# Supplementary material for: Transcriptome analysis of osmotic-responsive genes in ABA-dependent and -independent pathways in wheat (Triticum aestivum L.) roots
Source: PeerJ. 2019 Mar 5;7:e6519. doi: 10.7717/peerj.6519 (PMC6407504; doi:10.7717/peerj.6519)
Supplement: Supplemental Information 1 [file peerj-07-6519-s001.xlsx]

## Sheet: Sheet1
DEGs	Primers for qRT-PCR	Methods	Expression Levels						Correlation ( R2 )
			3hCK	3hPEG	3hABA	24hCK	24hPEG	24hABA
TRIAE_CS42_3AL_TGACv1_200876_AA0670290	TTTTGCTGTGGGTGTTCG(U)	qRT-PCR	1	142.848	9.70234	10.2556	29.6851	0.470304	0.99
	CTTCTTTACGGCTTGAGG(L)	RNA-seq	1.41917	131.545	3.66468	1.71156	6.74007	0.167088
TRIAE_CS42_2BS_TGACv1_146175_AA0457360	GGGTCTCGTCTGGATGGTGG(U)	qRT-PCR	1	2.55797	3.64268	5.78585	83.0937	10.1965	0.99
	TAGTTCGCCGAGGACGC(L)	RNA-seq	0.355894	2.59261	3.86258	0.61186	37.4097	1.36183
TRIAE_CS42_5BL_TGACv1_406750_AA1349490	AGTGCGGAGGTGAAGAGC(U)	qRT-PCR	1	15.6707	1068.72	23.8624	245.855	643.591	0.93
	GAACCGTCAATCATACATAGGG(L)	RNA-seq	1.26231	9.73625	915.115	9.61645	64.0062	948.719
TRIAE_CS42_5DL_TGACv1_434308_AA1433550	ATCCGATTGGAAAGTGCC(U)	qRT-PCR	1	0.284533	12.5679	1.77358	37.3577	0.0865693	0.91
	TCAAGCCATCAGGACGAG(L)	RNA-seq	4.01528	2.12396	54.6323	1.02928	67.4786	2.01462
TRIAE_CS42_5DL_TGACv1_433989_AA1426880	ATCCGATTGGAAAGTGCCG(U)	qRT-PCR	1	10.409	5.50427	2.0209	37.6175	0.0519524	0.99
	TATCAAGCCATCAGGACGAG(L)	RNA-seq	0.450368	4.91535	1.36076	0.331904	26.9901	1.15308
TRIAE_CS42_6DL_TGACv1_526736_AA1690960	CCATCCCTATCGCCTTGC(U)	qRT-PCR	1	0.812252	747.018	28.1163	115.094	96.3358	0.99
	ATTTCGCCCAGCGTGTC(L)	RNA-seq	2.0558	1.50077	247.565	1.72242	10.1036	34.4144
