# Supplementary material for: Transcriptome analysis of osmotic-responsive genes in ABA-dependent and -independent pathways in wheat (Triticum aestivum L.) roots
Source: PeerJ. 2019 Mar 5;7:e6519. doi: 10.7717/peerj.6519 (PMC6407504; doi:10.7717/peerj.6519)
Supplement: Supplemental Information 2 [file peerj-07-6519-s002.xlsx]

## Sheet: ABA-dependent signalling 3 h
Genes in red were up-regulated at 3 h osmotic stress, and the genes in green were down-regulated at 3 h osmotic stress in ABA-dependent signalling pathway.
Gene_id	CK_3 h (1)	CK_3 h (2)	CK_3 h (3)	PEG_3 h (1)	PEG_3 h (2)	PEG_3 h (3)	ABA_3 h (1)	ABA_3 h (2)	ABA_3 h (3)	Gene description
Novel00037	6	10	5	210	296	173	58	42	65	Subtilisin-like protease SDD1 [Triticum urartu]
Novel00211	6	1	2	40	73	39	401	246	235	hypothetical protein TRIUR3_27239 [Triticum urartu]
Novel00529	0	0	0	3	9	6	73	31	45	hypothetical protein TRIUR3_01061 [Triticum urartu]
Novel00692	3	1	3	22	38	19	1146	1235	952	TPA: plant-specific domain TIGR01568 family protein [Zea mays]>gi|645168135|gb|AIB05652.1| OFP transcription factor, partial [Zea mays]
Novel00842	3	9	4	89	53	48	410	901	806	hypothetical protein TRIUR3_17703 [Triticum urartu]
Novel01015	3	0	1	144	134	76	14	6	7	putative mitochondrial chaperone BCS1-B [Triticum urartu]
Novel01078	5	6	4	25	20	19	125	115	96	#N/A
Novel01091	54	51	50	230	180	293	425	467	454	#N/A
Novel01271	3	2	1	24	19	14	20	10	14	#N/A
Novel01278	5	10	6	230	172	162	47	16	18	retrotransposon protein, putative, unclassified [Oryza sativa Japonica Group]
Novel01588	1	3	1	12	27	20	1023	470	477	hypothetical protein TRIUR3_16882 [Triticum urartu]
Novel01734	0	4	1	27	25	18	14	12	5	PREDICTED: probable LRR receptor-like serine/threonine-protein kinase At3g47570 [Zea mays]
Novel01832	24	25	25	1265	325	994	390	91	180	putative cysteine desulfurase [Triticum urartu]
Novel02122	38	12	28	176	85	122	83	134	193	#N/A
Novel02149	44	25	58	557	317	573	410	150	352	#N/A
Novel02223	20	17	20	1101	397	907	174	72	107	predicted protein [Hordeum vulgare subsp. vulgare]
Novel02311	219	216	219	24319	13171	19807	4118	1263	1653	predicted protein [Hordeum vulgare subsp. vulgare]
Novel02326	103	55	69	670	643	420	277	261	307	predicted protein [Hordeum vulgare subsp. vulgare]
Novel02639	6	5	5	71	31	28	25	36	39	hypothetical protein F775_15371 [Aegilops tauschii]
Novel02671	0	0	1	19	4	6	42	49	80	#N/A
Novel02687	0	0	0	5	4	10	219	237	187	predicted protein [Hordeum vulgare subsp. vulgare]
Novel02912	9	33	23	106	77	95	155	81	93	Disease resistance protein RPM1 [Aegilops tauschii]
Novel02931	1	1	1	29	11	18	31	19	16	Subtilisin-like protease [Triticum urartu]
Novel03030	0	6	1	21	24	28	2193	3157	2452	hypothetical protein F775_52247 [Aegilops tauschii]
Novel03271	1022	953	1515	10183	6827	6899	6085	4206	4400	predicted protein [Hordeum vulgare subsp. vulgare]
Novel03307	15	15	18	621	632	603	212	134	157	heat shock factor protein 4 [Zea mays]
Novel03399	7	5	10	37	36	24	68	41	67	hypothetical protein TRIUR3_14659 [Triticum urartu]
Novel04098	2	1	1	28	14	35	28	11	17	hypothetical protein TRIUR3_07214 [Triticum urartu]
Novel04101	4	9	2	37	45	24	121	79	71	hypothetical protein TRIUR3_09710 [Triticum urartu]
Novel04290	19	46	21	429	406	401	251	105	137	hypothetical protein TRIUR3_11014 [Triticum urartu]
Novel04421	6	15	4	42	61	80	293	154	208	Tropinone reductase-like protein [Aegilops tauschii]
Novel04483	1	0	1	28	8	24	134	142	83	#N/A
Novel04761	15	23	21	688	507	668	235	85	82	unnamed protein product [Triticum aestivum]
Novel04762	35	42	42	1563	1548	1278	380	185	197	unnamed protein product [Triticum aestivum]
Novel04785	3	2	1	189	162	125	1493	2273	1623	#N/A
Novel04841	1	0	2	17	6	20	31	11	18	Putative pentatricopeptide repeat-containing protein [Aegilops tauschii]
Novel05233	3	2	6	162	117	164	261	186	272	hypothetical protein OsJ_03139 [Oryza sativa Japonica Group]
Novel05477	9	12	2	161	88	120	58	41	52	putative reverse transcriptase [Oryza sativa Japonica Group]>gi|108711395|gb|ABF99190.1| retrotransposon protein, putative, LINE subclass [Oryza sativa Japonica Group]
Novel05599	23	23	13	110	63	82	259	231	164	predicted protein [Hordeum vulgare subsp. vulgare]
Novel05618	0	3	0	12	6	12	56	97	91	#N/A
Novel05648	0	0	0	5	15	12	44	51	69	predicted protein [Hordeum vulgare subsp. vulgare]
Novel05656	81	21	39	509	313	451	513	401	406	predicted protein [Hordeum vulgare subsp. vulgare]
Novel05757	3	1	2	193	214	136	381	687	591	hypothetical protein F775_13911 [Aegilops tauschii]
Novel05842	9	10	4	174	160	226	4570	6291	5550	Acyltransferase-like protein [Aegilops tauschii]
Novel05960	84	51	45	356	214	253	215	344	324	predicted protein [Hordeum vulgare subsp. vulgare]
Novel05971	74	87	98	497	347	350	525	445	341	predicted protein [Hordeum vulgare subsp. vulgare]
Novel05990	5	7	0	127	116	93	1113	2385	2036	hypothetical protein F775_23973 [Aegilops tauschii]
Novel06032	14	22	12	317	316	269	2285	2445	1432	#N/A
Novel06202	1	2	0	62	27	36	44	70	88	hypothetical protein TRIUR3_30190 [Triticum urartu]
Novel06389	0	4	1	20	10	20	42	124	72	predicted protein [Hordeum vulgare subsp. vulgare]
Novel06418	3	6	0	50	49	48	23	24	20	GDSL esterase/lipase [Aegilops tauschii]
Novel06620	14	17	22	80	131	68	915	1098	793	DNA-binding protein EMBP-1 [Aegilops tauschii]
Novel07076	35	24	11	276	87	209	162	96	168	predicted protein [Hordeum vulgare subsp. vulgare]
Novel07274	2	5	3	26	11	19	76	58	46	unnamed protein product [Triticum aestivum]
Novel07335	0	2	0	8	20	16	117	118	93	predicted protein [Hordeum vulgare subsp. vulgare]
Novel07385	12	19	7	91	44	50	234	306	241	#N/A
Novel07582	53	40	64	285	321	226	2354	1516	1648	hypothetical protein TRIUR3_01061 [Triticum urartu]
Novel07611	1	0	1	18	5	6	25	59	24	hypothetical protein TRIUR3_01476 [Triticum urartu]
Novel07666	5	0	3	71	90	107	19	13	26	predicted protein [Hordeum vulgare subsp. vulgare]>gi|326531654|dbj|BAJ97831.1| predicted protein [Hordeum vulgare subsp. vulgare]
Novel07753	2	6	5	22	43	39	1083	1413	898	predicted protein [Hordeum vulgare subsp. vulgare]
Novel07824	20	47	26	212	123	190	299	233	249	hypothetical protein F775_20100 [Aegilops tauschii]
Novel08190	66	57	32	852	548	556	1617	2614	2077	#N/A
Novel08344	0	3	1	20	10	11	143	184	208	#N/A
Novel08392	3	0	2	26	29	23	448	343	174	#N/A
Novel08398	122	117	56	911	544	793	1117	1101	799	Subtilisin-like protease [Triticum urartu]
Novel08400	32	19	13	1149	1153	1063	432	330	565	hypothetical protein F775_30269 [Aegilops tauschii]
Novel08404	8	2	1	530	511	533	63	104	136	hypothetical protein TRIUR3_15912 [Triticum urartu]
Novel08456	394	235	301	1815	1227	1517	1213	1464	1776	PREDICTED: probable protein phosphatase 2C 34 [Zea mays]>gi|413932996|gb|AFW67547.1| hypothetical protein ZEAMMB73_941622 [Zea mays]>gi|645168642|gb|AIB05858.1| orphans transcription factor, partial [Zea mays]
Novel08481	0	0	0	15	11	11	23	7	3	#N/A
Novel08484	1	1	7	27	19	26	148	231	204	hypothetical protein TRIUR3_06504 [Triticum urartu]
Novel08501	120	149	93	892	596	1037	3690	3584	3240	hypothetical protein F775_23973 [Aegilops tauschii]
Novel08731	39	6	8	217	95	128	77	150	141	#N/A
Novel08796	16	40	11	1454	568	1082	1559	1934	1445	#N/A
Novel08856	12	3	6	41	31	32	58	31	37	Cellulose synthase-like protein E6 [Aegilops tauschii]
Novel08881	47	20	49	359	256	357	261	83	153	predicted protein [Hordeum vulgare subsp. vulgare]
Novel08968	2	1	0	82	77	55	169	32	61	unnamed protein product [Triticum aestivum]
Novel08971	6	5	9	90	111	70	69	27	27	hypothetical protein F775_01212 [Aegilops tauschii]
Novel09026	2	0	0	14	11	12	49	85	85	Sulfotransferase 17 [Aegilops tauschii]
Novel09129	14	24	12	147	175	98	2192	2700	2114	hypothetical protein F775_23760 [Aegilops tauschii]
Novel09242	228	225	260	1325	1012	1178	1193	875	1026	Ubiquitin carboxyl-terminal hydrolase 8 [Aegilops tauschii]
Novel09753	285	396	488	2877	1774	2010	1862	1265	1345	hypothetical protein TRIUR3_10566 [Triticum urartu]
Novel09799	5	4	0	17	30	22	285	277	244	hypothetical protein F775_24486 [Aegilops tauschii]
Novel09954	2	2	2	32	14	23	29	17	13	#N/A
Novel10297	0	0	0	7	10	8	10	12	18	gag polyprotein [Triticum monococcum subsp. aegilopoides]
Novel10300	127	135	168	9049	5183	7426	2006	732	976	#N/A
Novel10380	6	8	6	124	81	80	1526	1768	1656	hypothetical protein F775_42390 [Aegilops tauschii]
Novel10592	36	6	5	149	72	99	643	1024	947	hypothetical protein TRIUR3_13481 [Triticum urartu]
Novel10796	5	4	8	49	37	38	36	22	28	#N/A
Novel10804	11	3	6	308	291	269	143	30	43	PREDICTED: uncharacterized protein LOC101768421 [Setaria italica]
Novel11071	2	3	2	28	28	41	33	11	11	PREDICTED: putative ribonuclease H protein At1g65750-like [Setaria italica]
Novel11314	35	44	36	714	316	596	567	192	179	predicted protein [Hordeum vulgare subsp. vulgare]
Novel11381	13	22	11	54	82	80	256	296	306	Mismatch repair endonuclease PMS2 [Aegilops tauschii]
Novel11491	357	426	392	2314	1307	1673	3949	4794	4973	#N/A
Novel11558	4	7	2	28	30	21	521	868	543	hypothetical protein TRIUR3_11261 [Triticum urartu]
Novel11623	9	13	5	70	38	42	71	49	32	#N/A
Novel11676	1	1	1	46	35	39	260	302	378	hypothetical protein F775_42390 [Aegilops tauschii]
Novel11687	33	47	37	549	663	458	2516	2173	2086	hypothetical protein TRIUR3_06504 [Triticum urartu]
Novel11832	0	0	1	156	99	142	139	219	193	#N/A
Novel11976	0	0	2	30	59	22	312	45	44	hypothetical protein TRIUR3_10988 [Triticum urartu]
Novel12141	8	17	12	84	36	72	277	74	113	hypothetical protein F775_17175 [Aegilops tauschii]
Novel12244	484	535	448	3535	2687	3061	3064	2493	2089	predicted protein [Hordeum vulgare subsp. vulgare]
Novel12329	1	2	2	29	11	10	59	45	18	Putative glucan endo-1,3-beta-glucosidase A6 [Aegilops tauschii]
Novel12384	2	5	12	45	28	25	61	48	47	hypothetical protein TRIUR3_10557 [Triticum urartu]
Novel12479	37	28	35	763	321	429	1204	1564	1589	early salt-stress induced 2-2 [Triticum aestivum]
Novel12530	43	36	30	708	473	412	128	130	125	hypothetical protein F775_24328 [Aegilops tauschii]
Novel12652	32	91	53	848	481	672	372	453	381	Polygalacturonase [Aegilops tauschii]
Novel12768	3	3	0	29	11	29	95	89	84	hypothetical protein TRIUR3_13071 [Triticum urartu]
Novel12886	1	3	0	59	32	42	190	399	331	hypothetical protein TRIUR3_13071 [Triticum urartu]
Novel13360	3	1	5	25	33	17	14	13	17	#N/A
Novel13388	16	14	10	508	358	453	363	329	275	hypothetical protein TRIUR3_23739 [Triticum urartu]
Novel13407	43	32	16	231	151	120	155	241	186	hypothetical protein F775_08198 [Aegilops tauschii]
Novel13474	5	8	0	26	11	22	73	44	46	hypothetical protein F775_32167 [Aegilops tauschii]
Novel13982	3	3	0	21	18	6	16	17	10	unnamed protein product [Triticum aestivum]
Novel14026	79	84	88	897	609	880	324	334	344	Phospholipid-transporting ATPase 1 [Triticum urartu]
TRIAE_CS42_1AL_TGACv1_000076_AA0002640	30	17	28	378	211	205	162	124	99	#N/A
TRIAE_CS42_1AL_TGACv1_000157_AA0005000	465	448	517	3280	3327	3145	3211	2553	2488	Aldolase-type TIM barrel
TRIAE_CS42_1AL_TGACv1_000332_AA0009230	12	5	10	35	53	37	23	46	32	consensus disorder prediction
TRIAE_CS42_1AL_TGACv1_000597_AA0015440	13	9	8	90	32	66	154	45	65	consensus disorder prediction
TRIAE_CS42_1AL_TGACv1_000597_AA0015470	24	18	22	104	136	103	198	144	167	AP2/ERF domain
TRIAE_CS42_1AL_TGACv1_000725_AA0017970	66	50	119	1445	2001	1519	1948	762	556	Glutathione S-transferase, C-terminal-like
TRIAE_CS42_1AL_TGACv1_000762_AA0018590	23	60	10	138	257	191	4407	4548	3168	consensus disorder prediction
TRIAE_CS42_1AL_TGACv1_000790_AA0019130	12	8	1	80	69	55	155	395	512	#N/A
TRIAE_CS42_1AL_TGACv1_000794_AA0019280	18	3	16	275	126	200	64	52	85	Protein kinase-like domain
TRIAE_CS42_1AL_TGACv1_000986_AA0023230	8	11	5	35	53	28	4417	5786	4433	consensus disorder prediction
TRIAE_CS42_1AL_TGACv1_001032_AA0023820	0	0	2	28	4	12	10	13	9	Protein kinase-like domain
TRIAE_CS42_1AL_TGACv1_001050_AA0024030	56	27	33	866	546	709	127	140	187	Prokaryotic membrane lipoprotein lipid attachment site profile.
TRIAE_CS42_1AL_TGACv1_001063_AA0024240	20	23	12	199	113	186	265	190	243	consensus disorder prediction
TRIAE_CS42_1AL_TGACv1_001087_AA0024710	94	76	136	1855	1158	1698	1341	1294	1515	consensus disorder prediction
TRIAE_CS42_1AL_TGACv1_001135_AA0025630	10	4	6	72	16	48	62	24	36	GDP-fucose protein O-fucosyltransferase
TRIAE_CS42_1AL_TGACv1_001291_AA0028340	30	10	23	1113	496	674	376	479	597	consensus disorder prediction
TRIAE_CS42_1AL_TGACv1_001321_AA0028630	23	25	5	143	65	87	132	61	35	consensus disorder prediction
TRIAE_CS42_1AL_TGACv1_001355_AA0029210	18	1	9	143	66	68	191	531	663	NAD(P)-binding domain
TRIAE_CS42_1AL_TGACv1_001567_AA0032430	2	1	0	11	15	16	984	485	357	#N/A
TRIAE_CS42_1AL_TGACv1_001646_AA0033400	200	526	92	1604	1513	1701	51071	57132	52705	#N/A
TRIAE_CS42_1AL_TGACv1_001650_AA0033550	1	2	0	12	5	11	16	8	4	#N/A
TRIAE_CS42_1AL_TGACv1_001798_AA0035330	406	306	361	1792	1899	1425	1474	1654	2560	Glycoside hydrolase, family 14
TRIAE_CS42_1AL_TGACv1_001837_AA0035720	0	0	0	19	30	26	9	12	3	consensus disorder prediction
TRIAE_CS42_1AL_TGACv1_001912_AA0036610	168	167	252	928	842	822	1129	976	853	Multi antimicrobial extrusion protein
TRIAE_CS42_1AL_TGACv1_001993_AA0037630	8	5	3	29	28	39	658	965	756	PPM-type phosphatase domain
TRIAE_CS42_1AL_TGACv1_002007_AA0037760	96	59	77	1546	654	1221	271	240	389	Nucleotide-diphospho-sugar transferases
TRIAE_CS42_1AL_TGACv1_002057_AA0038220	30	66	14	293	507	269	606	246	275	Clp ATPase, C-terminal
TRIAE_CS42_1AL_TGACv1_002139_AA0039010	138	115	63	456	448	469	1859	1865	1809	NAC domain
TRIAE_CS42_1AL_TGACv1_002265_AA0040210	13	10	13	209	235	204	48	72	60	consensus disorder prediction
TRIAE_CS42_1AL_TGACv1_002415_AA0041640	12	20	11	48	56	81	3405	4530	4575	eRF1 domain 1/Pelota-like
TRIAE_CS42_1AL_TGACv1_002444_AA0042030	18	21	9	123	70	76	365	79	113	Serine/threonine-protein kinase, active site
TRIAE_CS42_1AL_TGACv1_002610_AA0043600	26	26	20	382	285	370	115	134	111	consensus disorder prediction
TRIAE_CS42_1AL_TGACv1_002675_AA0044370	111	147	46	686	673	616	21410	30387	25969	Phosphatidylethanolamine-binding protein
TRIAE_CS42_1AL_TGACv1_002766_AA0045020	88	134	118	562	424	500	1432	2050	1925	consensus disorder prediction
TRIAE_CS42_1AL_TGACv1_002870_AA0045710	376	411	355	2098	1466	1454	1347	1312	1594	consensus disorder prediction
TRIAE_CS42_1AL_TGACv1_003203_AA0048670	101	118	96	725	573	747	442	421	317	Thioredoxin-like fold
TRIAE_CS42_1AL_TGACv1_003763_AA0051440	35	21	21	168	127	124	248	342	219	Zinc finger, RING-CH-type
TRIAE_CS42_1AL_TGACv1_004249_AA0052940	336	105	358	2172	1493	1788	2105	2073	2329	EF-hand domain
TRIAE_CS42_1AS_TGACv1_019507_AA0067450	17	17	21	479	305	411	176	91	124	Homeodomain-like
TRIAE_CS42_1AS_TGACv1_019597_AA0068860	14	4	7	36	43	63	96	170	156	Peroxidases heam-ligand binding site
TRIAE_CS42_1AS_TGACv1_019639_AA0069270	32	71	19	186	163	202	10610	12387	10192	consensus disorder prediction
TRIAE_CS42_1AS_TGACv1_019706_AA0070290	154	58	75	661	278	406	320	364	475	#N/A
TRIAE_CS42_1AS_TGACv1_019982_AA0073540	62	82	94	1816	666	1228	2517	1322	1646	Chloramphenicol acetyltransferase-like domain
TRIAE_CS42_1AS_TGACv1_020470_AA0077680	100	163	65	1905	1193	1003	927	820	754	consensus disorder prediction
TRIAE_CS42_1AS_TGACv1_021065_AA0080880	80	40	112	990	394	666	1536	1715	2002	#N/A
TRIAE_CS42_1BL_TGACv1_030290_AA0085570	9	12	2	177	173	204	4878	5772	5115	Peptide Chain Release Factor eRF1/aRF1, N-terminal
TRIAE_CS42_1BL_TGACv1_030382_AA0088770	22	26	19	286	174	173	207	136	104	#N/A
TRIAE_CS42_1BL_TGACv1_030440_AA0090730	5	20	3	47	53	32	2666	3386	2035	consensus disorder prediction
TRIAE_CS42_1BL_TGACv1_030456_AA0091220	17	69	8	380	369	339	4124	5108	3494	consensus disorder prediction
TRIAE_CS42_1BL_TGACv1_030714_AA0098770	1314	1512	1788	18008	13799	18915	7211	8481	7852	Cytochrome P450, E-class, group I
TRIAE_CS42_1BL_TGACv1_030749_AA0099760	37	30	23	161	146	133	122	398	440	Glycerol-3-phosphate dehydrogenase, NAD-dependent, C-terminal
TRIAE_CS42_1BL_TGACv1_030762_AA0100080	4	4	2	71	50	61	238	393	399	Protein kinase, ATP binding site
TRIAE_CS42_1BL_TGACv1_030782_AA0100720	4	5	7	55	86	70	811	145	112	Enoyl-(Acyl carrier protein) reductase
TRIAE_CS42_1BL_TGACv1_030961_AA0104610	6	5	5	76	36	44	70	107	96	consensus disorder prediction
TRIAE_CS42_1BL_TGACv1_030979_AA0104980	411	320	431	2797	2747	2505	2336	2217	3027	Glycoside hydrolase, catalytic domain
TRIAE_CS42_1BL_TGACv1_031022_AA0105970	9	2	6	631	459	445	265	217	260	#N/A
TRIAE_CS42_1BL_TGACv1_031048_AA0106690	167	291	127	2739	2964	2264	2597	1535	1755	ATPase, AAA-type, core
TRIAE_CS42_1BL_TGACv1_031049_AA0106750	34	28	28	420	506	370	13272	20395	15897	consensus disorder prediction
TRIAE_CS42_1BL_TGACv1_031049_AA0106760	0	0	0	2	15	12	137	272	229	#N/A
TRIAE_CS42_1BL_TGACv1_031096_AA0107520	10	9	6	274	121	149	75	59	43	Protein kinase domain
TRIAE_CS42_1BL_TGACv1_031117_AA0108110	76	13	24	1426	880	991	339	350	528	Serine/threonine-protein kinase, active site
TRIAE_CS42_1BL_TGACv1_031136_AA0108450	5	4	8	43	19	57	62	89	148	GH18_hevamine_XipI_class_III
TRIAE_CS42_1BL_TGACv1_031159_AA0108940	169	196	134	1606	776	1365	905	629	745	consensus disorder prediction
TRIAE_CS42_1BL_TGACv1_031176_AA0109230	845	950	623	6146	3485	4538	3044	2912	2954	Coiled-coil domain containing protein 109, C-terminal
TRIAE_CS42_1BL_TGACv1_031254_AA0110410	184	33	65	792	538	505	654	486	721	EF-hand domain
TRIAE_CS42_1BL_TGACv1_031362_AA0112360	10	23	13	202	320	231	12145	15773	14943	#N/A
TRIAE_CS42_1BL_TGACv1_031443_AA0114190	139	103	106	1808	1760	1497	431	438	362	Heat shock factor (HSF)-type, DNA-binding
TRIAE_CS42_1BL_TGACv1_031605_AA0116990	686	448	258	3109	1815	2103	1417	1665	2079	Alpha/Beta hydrolase fold
TRIAE_CS42_1BL_TGACv1_031624_AA0117310	61	236	88	573	880	795	30725	35851	29451	#N/A
TRIAE_CS42_1BL_TGACv1_031640_AA0117720	48	58	76	311	328	266	338	275	221	Multi antimicrobial extrusion protein
TRIAE_CS42_1BL_TGACv1_031864_AA0121980	112	126	97	722	561	625	430	571	472	#N/A
TRIAE_CS42_1BL_TGACv1_031945_AA0123170	57	65	69	451	205	221	302	209	273	Wall-associated receptor kinase, C-terminal
TRIAE_CS42_1BL_TGACv1_031958_AA0123500	53	27	47	867	347	420	440	318	342	#N/A
TRIAE_CS42_1BL_TGACv1_032208_AA0126830	26	2	11	1429	888	1014	436	561	915	Protein kinase domain
TRIAE_CS42_1BL_TGACv1_032390_AA0129310	8	7	6	109	48	80	24	66	60	P-loop containing nucleoside triphosphate hydrolase
TRIAE_CS42_1BL_TGACv1_032454_AA0130080	90	187	64	531	581	544	22071	31401	25107	YbhB/YbcL
TRIAE_CS42_1BL_TGACv1_032519_AA0130850	43	34	57	381	405	394	1552	2343	1962	consensus disorder prediction
TRIAE_CS42_1BL_TGACv1_032826_AA0134520	139	143	127	584	808	630	2117	2982	2350	Homeobox domain
TRIAE_CS42_1BL_TGACv1_032965_AA0135820	46	77	33	565	254	526	685	778	890	#N/A
TRIAE_CS42_1BL_TGACv1_032973_AA0135890	8	2	3	87	21	65	12	39	26	#N/A
TRIAE_CS42_1BL_TGACv1_032980_AA0136000	5	6	8	26	36	20	495	727	428	Zinc finger, RING-CH-type
TRIAE_CS42_1BL_TGACv1_033018_AA0136240	18	1	6	391	243	275	601	819	910	consensus disorder prediction
TRIAE_CS42_1BL_TGACv1_033119_AA0137130	0	0	1	244	335	231	11	3	9	consensus disorder prediction
TRIAE_CS42_1BL_TGACv1_033678_AA0141260	573	206	268	2382	1501	1766	1212	1753	1843	consensus disorder prediction
TRIAE_CS42_1BL_TGACv1_033749_AA0141880	0	2	0	39	32	38	17	24	25	#N/A
TRIAE_CS42_1BL_TGACv1_033889_AA0142540	55	48	51	594	433	358	202	198	163	consensus disorder prediction
TRIAE_CS42_1BL_TGACv1_034040_AA0143180	964	765	1306	15722	12641	14000	6538	4255	4754	Glutathione S-transferase, C-terminal-like
TRIAE_CS42_1BL_TGACv1_034112_AA0143450	6	2	2	24	31	16	233	186	181	F-box domain
TRIAE_CS42_1BL_TGACv1_034275_AA0144060	0	1	0	25	21	32	18	6	3	Peptidase S8, subtilisin, Asp-active site
TRIAE_CS42_1BL_TGACv1_035095_AA0146140	5	5	6	37	39	26	19	38	18	Zinc finger, CCCH-type
TRIAE_CS42_1BL_TGACv1_037105_AA0147580	0	0	1	50	62	65	35	6	15	#N/A
TRIAE_CS42_1BS_TGACv1_049677_AA0159460	8	10	1	75	92	57	139	163	144	consensus disorder prediction
TRIAE_CS42_1BS_TGACv1_049914_AA0164140	7	4	5	262	97	228	45	12	20	#N/A
TRIAE_CS42_1BS_TGACv1_050178_AA0168680	2	3	3	12	10	19	327	573	385	PLAT/LH2 domain
TRIAE_CS42_1BS_TGACv1_052072_AA0181280	93	49	45	409	255	344	209	299	408	Glycosyltransferase AER61, uncharacterised
TRIAE_CS42_1DL_TGACv1_061115_AA0185890	126	161	210	953	457	854	752	779	1010	Cys/Met metabolism, pyridoxal phosphate-dependent enzyme
TRIAE_CS42_1DL_TGACv1_061177_AA0187930	106	265	119	813	640	608	26612	35973	30543	Phosphatidylethanolamine-binding protein
TRIAE_CS42_1DL_TGACv1_061266_AA0190520	359	326	404	6791	4549	5048	1511	1049	1365	Serine-threonine/tyrosine-protein kinase catalytic domain
TRIAE_CS42_1DL_TGACv1_061266_AA0190540	108	106	44	790	562	563	834	487	437	Enoyl-(Acyl carrier protein) reductase
TRIAE_CS42_1DL_TGACv1_061276_AA0190870	7	4	6	264	361	322	82	31	76	Peptidase S8, subtilisin, Asp-active site
TRIAE_CS42_1DL_TGACv1_061314_AA0192270	11	11	9	110	66	54	282	309	187	Protein of unknown function DUF3675
TRIAE_CS42_1DL_TGACv1_061321_AA0192370	10	15	16	249	289	179	224	119	199	P-type cation-transporting ATPase superfamily signature
TRIAE_CS42_1DL_TGACv1_061383_AA0193800	63	109	89	826	228	725	558	210	329	Heat shock factor (HSF)-type, DNA-binding
TRIAE_CS42_1DL_TGACv1_061388_AA0193890	4	3	6	34	57	32	20	23	18	#N/A
TRIAE_CS42_1DL_TGACv1_061394_AA0194010	70	68	56	626	330	443	584	304	403	consensus disorder prediction
TRIAE_CS42_1DL_TGACv1_061434_AA0195270	54	96	62	398	259	303	1455	910	821	PP2Cc
TRIAE_CS42_1DL_TGACv1_061442_AA0195380	160	202	123	987	843	920	3559	3630	3429	consensus disorder prediction
TRIAE_CS42_1DL_TGACv1_061488_AA0196760	10	6	13	32	90	66	553	452	276	NTF2-like domain
TRIAE_CS42_1DL_TGACv1_061505_AA0197140	0	0	0	155	231	149	9	6	3	consensus disorder prediction
TRIAE_CS42_1DL_TGACv1_061522_AA0197700	1	2	1	41	114	60	4449	5230	3963	consensus disorder prediction
TRIAE_CS42_1DL_TGACv1_061539_AA0198230	65	60	104	436	403	391	1625	2308	2236	consensus disorder prediction
TRIAE_CS42_1DL_TGACv1_061590_AA0199340	50	51	57	518	508	620	286	227	189	consensus disorder prediction
TRIAE_CS42_1DL_TGACv1_061597_AA0199590	5	7	0	189	137	167	3784	4600	3622	eRF1 domain 2
TRIAE_CS42_1DL_TGACv1_061629_AA0200390	3	0	0	116	53	92	38	34	65	consensus disorder prediction
TRIAE_CS42_1DL_TGACv1_061629_AA0200410	3	1	0	154	76	83	14	12	22	Protein kinase domain
TRIAE_CS42_1DL_TGACv1_061629_AA0200450	15	6	4	188	70	131	51	56	38	Protein kinase domain
TRIAE_CS42_1DL_TGACv1_061644_AA0200730	128	72	106	17409	7761	11792	668	338	326	AAA domain
TRIAE_CS42_1DL_TGACv1_061647_AA0200940	236	440	146	1651	1025	1487	67133	78588	70583	consensus disorder prediction
TRIAE_CS42_1DL_TGACv1_061688_AA0201750	0	0	0	12	3	8	7	15	10	#N/A
TRIAE_CS42_1DL_TGACv1_061713_AA0202190	90	145	75	1086	1268	892	1932	804	835	ATPase, AAA-type, core
TRIAE_CS42_1DL_TGACv1_061734_AA0202680	28	18	35	257	227	272	314	234	241	AP2/ERF domain
TRIAE_CS42_1DL_TGACv1_061772_AA0203220	4	6	7	100	119	59	238	107	115	#N/A
TRIAE_CS42_1DL_TGACv1_061840_AA0204140	7	2	6	58	32	40	50	27	51	#N/A
TRIAE_CS42_1DL_TGACv1_061867_AA0204830	7	40	5	127	233	186	1624	1583	1223	consensus disorder prediction
TRIAE_CS42_1DL_TGACv1_061990_AA0206980	72	7	23	1491	659	1082	325	472	662	Protein kinase-like domain
TRIAE_CS42_1DL_TGACv1_061990_AA0207010	85	8	27	1100	551	741	264	401	631	Protein kinase domain
TRIAE_CS42_1DL_TGACv1_062012_AA0207370	5	4	2	19	21	13	2226	2712	1620	consensus disorder prediction
TRIAE_CS42_1DL_TGACv1_062105_AA0208810	3	1	9	14	16	34	13	22	14	Xyloglucan fucosyltransferase
TRIAE_CS42_1DL_TGACv1_062221_AA0210720	222	260	200	1262	1117	1249	1768	2377	2009	Homeobox domain
TRIAE_CS42_1DL_TGACv1_062300_AA0212050	124	83	104	321	515	442	729	395	452	Glutathione S-transferase, N-terminal
TRIAE_CS42_1DL_TGACv1_062300_AA0212090	54	48	48	556	590	628	1061	575	365	Glutathione S-transferase, N-terminal
TRIAE_CS42_1DL_TGACv1_062322_AA0212530	38	35	30	893	624	705	529	1593	2053	NAD(P)-binding domain
TRIAE_CS42_1DL_TGACv1_062387_AA0213600	695	265	267	3418	2200	2297	1164	1766	1964	consensus disorder prediction
TRIAE_CS42_1DL_TGACv1_062460_AA0214820	29	26	26	182	129	138	212	182	183	#N/A
TRIAE_CS42_1DL_TGACv1_062547_AA0216250	58	94	59	3045	618	1374	505	244	241	Zinc finger, RING-type
TRIAE_CS42_1DL_TGACv1_062662_AA0217950	12	2	3	182	186	167	36	29	68	consensus disorder prediction
TRIAE_CS42_1DL_TGACv1_062756_AA0219430	23	21	19	240	85	175	324	108	84	GST_N_Tau
TRIAE_CS42_1DL_TGACv1_062818_AA0220420	3	3	10	35	29	26	82	125	121	#N/A
TRIAE_CS42_1DL_TGACv1_062917_AA0221660	18	20	17	173	104	192	170	134	231	consensus disorder prediction
TRIAE_CS42_1DL_TGACv1_062960_AA0222260	3	4	2	45	14	17	26	14	18	#N/A
TRIAE_CS42_1DL_TGACv1_063188_AA0224790	50	28	43	559	264	318	220	185	158	#N/A
TRIAE_CS42_1DL_TGACv1_063471_AA0227620	19	48	17	502	896	621	25725	34290	29950	Late embryogenesis abundant protein LEA
TRIAE_CS42_1DL_TGACv1_063686_AA0229870	0	0	0	8	10	12	141	41	39	Cytochrome P450, conserved site
TRIAE_CS42_1DL_TGACv1_063699_AA0230030	174	150	120	774	619	653	861	1040	1356	Alpha/Beta hydrolase fold
TRIAE_CS42_1DL_TGACv1_063704_AA0230100	109	118	129	1663	1328	1637	1901	1147	1383	consensus disorder prediction
TRIAE_CS42_1DL_TGACv1_063729_AA0230300	9	23	9	204	88	100	120	78	30	Protein kinase, ATP binding site
TRIAE_CS42_1DL_TGACv1_063778_AA0230750	261	93	232	2106	1218	1735	1683	1400	1967	EF-hand domain
TRIAE_CS42_1DL_TGACv1_064387_AA0234170	6	3	5	39	26	18	439	384	370	#N/A
TRIAE_CS42_1DL_TGACv1_064618_AA0235090	8	2	4	301	176	275	145	298	418	Protein kinase domain
TRIAE_CS42_1DL_TGACv1_064652_AA0235250	202	174	165	825	988	745	922	822	1271	Glycoside hydrolase, family 14
TRIAE_CS42_1DL_TGACv1_064894_AA0236060	97	75	104	2909	2060	2532	2000	1508	2049	consensus disorder prediction
TRIAE_CS42_1DS_TGACv1_080174_AA0242300	0	0	0	112	51	73	17	20	11	SGNH hydrolase-type esterase domain
TRIAE_CS42_1DS_TGACv1_080368_AA0246900	27	29	48	522	430	615	190	148	184	Homeodomain-like
TRIAE_CS42_1DS_TGACv1_080501_AA0249160	1	4	2	36	20	46	11	17	23	Non-haem dioxygenase N-terminal domain
TRIAE_CS42_1DS_TGACv1_080520_AA0249460	514	569	621	3802	1755	3249	7047	4498	5798	#N/A
TRIAE_CS42_1DS_TGACv1_080618_AA0251110	91	95	58	1733	1279	1039	1361	1386	1139	consensus disorder prediction
TRIAE_CS42_1DS_TGACv1_081061_AA0257260	509	209	359	3540	1490	2150	1180	1359	1950	consensus disorder prediction
TRIAE_CS42_1DS_TGACv1_081195_AA0258600	87	106	69	594	476	537	578	244	277	WD40-repeat-containing domain
TRIAE_CS42_1DS_TGACv1_081229_AA0258940	475	246	1171	6069	5413	6054	2219	2679	3373	#N/A
TRIAE_CS42_1DS_TGACv1_082067_AA0263710	42	45	32	217	121	204	234	160	173	consensus disorder prediction
TRIAE_CS42_1DS_TGACv1_082276_AA0264330	14	18	13	76	36	98	391	272	346	Chloramphenicol acetyltransferase-like domain
TRIAE_CS42_1DS_TGACv1_082418_AA0264600	25	55	48	533	244	346	1050	626	764	#N/A
TRIAE_CS42_2AL_TGACv1_092950_AA0267860	3	6	1	12	27	20	1640	1981	1596	consensus disorder prediction
TRIAE_CS42_2AL_TGACv1_093178_AA0274200	8	3	2	162	143	141	928	1315	976	consensus disorder prediction
TRIAE_CS42_2AL_TGACv1_093314_AA0277100	9	1	5	52	52	46	18	21	18	consensus disorder prediction
TRIAE_CS42_2AL_TGACv1_093504_AA0281410	194	176	245	1245	1460	1181	848	1202	1030	AP2/ERF domain
TRIAE_CS42_2AL_TGACv1_093545_AA0282360	119	93	102	11154	6089	9752	1992	484	799	consensus disorder prediction
TRIAE_CS42_2AL_TGACv1_093584_AA0283130	123	92	85	2138	1020	1767	811	373	559	Late embryogenesis abundant protein, LEA-14
TRIAE_CS42_2AL_TGACv1_093585_AA0283180	1004	947	1047	16004	9477	9822	5032	3217	3705	consensus disorder prediction
TRIAE_CS42_2AL_TGACv1_093707_AA0285450	10	7	10	35	44	42	91	68	116	#N/A
TRIAE_CS42_2AL_TGACv1_093757_AA0286150	103	94	134	909	880	787	399	720	486	Peptidase C13, legumain
TRIAE_CS42_2AL_TGACv1_093982_AA0290630	12	6	11	61	53	63	127	26	47	Phytocyanin
TRIAE_CS42_2AL_TGACv1_094403_AA0297090	25	13	11	463	232	259	147	151	174	Tify domain
TRIAE_CS42_2AL_TGACv1_094642_AA0300990	13	5	4	109	78	71	45	53	37	#N/A
TRIAE_CS42_2AL_TGACv1_094650_AA0301090	18	24	21	787	726	773	293	224	278	consensus disorder prediction
TRIAE_CS42_2AL_TGACv1_094734_AA0302330	5	2	2	34	12	25	158	250	243	#N/A
TRIAE_CS42_2AL_TGACv1_094976_AA0305460	80	57	202	1285	922	1291	1033	1033	951	Chloramphenicol acetyltransferase-like domain
TRIAE_CS42_2AL_TGACv1_095158_AA0307540	28	34	16	184	102	95	1359	1602	1866	consensus disorder prediction
TRIAE_CS42_2AL_TGACv1_095163_AA0307690	3	4	5	48	29	31	24	18	21	consensus disorder prediction
TRIAE_CS42_2AL_TGACv1_095454_AA0310940	5	3	11	27	40	38	392	1382	1830	consensus disorder prediction
TRIAE_CS42_2AL_TGACv1_095876_AA0315450	319	497	412	5740	2695	4606	1917	1842	2096	#N/A
TRIAE_CS42_2AL_TGACv1_096113_AA0317230	215	180	150	1541	680	1356	847	402	746	Aromatic amino acid lyase
TRIAE_CS42_2AL_TGACv1_096113_AA0317240	532	321	457	4080	1742	3406	2283	2435	3611	Phenylalanine ammonia-lyase, shielding domain
TRIAE_CS42_2AL_TGACv1_096574_AA0319940	8	6	9	55	46	48	80	65	47	Small auxin-up RNA
TRIAE_CS42_2AL_TGACv1_097009_AA0322570	31	9	16	240	200	179	149	49	123	Myb domain
TRIAE_CS42_2AL_TGACv1_097026_AA0322660	46	36	42	303	239	271	230	163	136	consensus disorder prediction
TRIAE_CS42_2AL_TGACv1_097129_AA0323080	0	0	0	22	27	24	15	3	7	#N/A
TRIAE_CS42_2AL_TGACv1_098345_AA0326010	716	708	676	4235	3287	3084	2260	2802	2858	#N/A
TRIAE_CS42_2AL_TGACv1_098554_AA0326400	190	137	167	1131	569	1011	944	500	656	Exocyst complex component Exo70
TRIAE_CS42_2AS_TGACv1_112079_AA0329750	372	198	401	11761	6917	10607	3083	2114	2621	Cytochrome P450
TRIAE_CS42_2AS_TGACv1_112164_AA0332090	8	15	10	72	16	63	1972	525	637	Oxoglutarate/iron-dependent dioxygenase
TRIAE_CS42_2AS_TGACv1_112193_AA0332790	4	6	1	36	29	46	976	1060	1023	consensus disorder prediction
TRIAE_CS42_2AS_TGACv1_112241_AA0333980	1596	2341	1598	19518	15996	16308	7944	10652	8529	Phosphoadenosine phosphosulphate reductase
TRIAE_CS42_2AS_TGACv1_112357_AA0336310	47	34	75	1878	2260	1882	369	991	1008	consensus disorder prediction
TRIAE_CS42_2AS_TGACv1_112483_AA0338910	474	965	522	9378	6094	7624	3055	3453	3392	Triose phosphate/phosphoenolpyruvate translocator
TRIAE_CS42_2AS_TGACv1_112606_AA0342130	8	2	11	41	37	26	78	37	20	P-loop containing nucleoside triphosphate hydrolase
TRIAE_CS42_2AS_TGACv1_112707_AA0343770	118	88	131	6275	4584	6224	1986	1442	1628	Cytochrome P450
TRIAE_CS42_2AS_TGACv1_112732_AA0344260	3	1	2	33	29	30	14	7	12	consensus disorder prediction
TRIAE_CS42_2AS_TGACv1_112861_AA0346250	108	127	134	987	861	846	1149	1780	1802	Sugar transporter, conserved site
TRIAE_CS42_2AS_TGACv1_112913_AA0347560	19	4	11	458	264	379	163	61	125	Xylanase inhibitor, N-terminal
TRIAE_CS42_2AS_TGACv1_113018_AA0349830	33	33	28	918	343	503	208	93	139	WRKY domain
TRIAE_CS42_2AS_TGACv1_113031_AA0350150	10	1	10	64	45	41	57	32	33	consensus disorder prediction
TRIAE_CS42_2AS_TGACv1_113045_AA0350420	0	0	0	37	33	24	36	42	41	#N/A
TRIAE_CS42_2AS_TGACv1_113337_AA0354650	205	149	200	5222	3327	5327	2379	1262	2116	Cytochrome P450, E-class, group I
TRIAE_CS42_2AS_TGACv1_113480_AA0356670	2	0	2	15	38	26	9	8	11	FAS1 domain
TRIAE_CS42_2AS_TGACv1_113480_AA0356680	4	0	2	85	59	86	13	26	17	FAS1 domain
TRIAE_CS42_2AS_TGACv1_113487_AA0356770	425	590	345	3283	2209	2581	6037	5916	5327	Heavy metal-associated domain, HMA
TRIAE_CS42_2AS_TGACv1_113688_AA0359340	0	0	0	7	8	6	46	26	19	consensus disorder prediction
TRIAE_CS42_2AS_TGACv1_113791_AA0360500	111	70	78	595	522	460	742	1054	747	Domain of unknown function DUF4408
TRIAE_CS42_2AS_TGACv1_113940_AA0362600	1	5	5	94	27	31	83	92	47	Nucleotide-diphospho-sugar transferases
TRIAE_CS42_2AS_TGACv1_114082_AA0363880	6	9	4	48	30	24	62	28	64	consensus disorder prediction
TRIAE_CS42_2AS_TGACv1_114517_AA0367750	10	6	13	402	504	421	40	47	50	Ovate protein family, C-terminal
TRIAE_CS42_2AS_TGACv1_114529_AA0367820	4	5	6	188	75	57	262	454	298	Glycosyl transferase, family 8
TRIAE_CS42_2AS_TGACv1_114665_AA0368710	18	10	5	82	49	80	277	381	626	Alpha/Beta hydrolase fold
TRIAE_CS42_2BL_TGACv1_129386_AA0381170	2	11	2	30	29	31	356	297	303	Pectinesterase inhibitor domain
TRIAE_CS42_2BL_TGACv1_129396_AA0381730	18	23	29	949	958	823	163	146	201	consensus disorder prediction
TRIAE_CS42_2BL_TGACv1_129417_AA0382710	11	8	7	107	96	142	184	70	49	UDP-glucuronosyl/UDP-glucosyltransferase
TRIAE_CS42_2BL_TGACv1_129417_AA0382730	0	0	0	68	31	53	35	20	10	UDP-glucuronosyl/UDP-glucosyltransferase
TRIAE_CS42_2BL_TGACv1_129449_AA0384160	16	27	11	117	91	79	130	123	54	retropepsin_like
TRIAE_CS42_2BL_TGACv1_129530_AA0387370	74	30	113	581	417	533	334	606	733	Homeodomain-like
TRIAE_CS42_2BL_TGACv1_129565_AA0388800	109	70	62	491	348	335	434	195	319	Cullin repeat-like-containing domain
TRIAE_CS42_2BL_TGACv1_129640_AA0391310	14	7	3	2069	1325	1505	29	20	43	HLH
TRIAE_CS42_2BL_TGACv1_129675_AA0392270	3	0	5	58	49	38	21	11	16	consensus disorder prediction
TRIAE_CS42_2BL_TGACv1_129759_AA0394990	758	688	812	11030	6818	6731	5111	3463	3284	consensus disorder prediction
TRIAE_CS42_2BL_TGACv1_129793_AA0396210	876	800	999	6366	5574	5908	7130	7791	7849	#N/A
TRIAE_CS42_2BL_TGACv1_129800_AA0396470	382	157	638	1979	1312	2219	1687	840	2110	SKP1/BTB/POZ domain
TRIAE_CS42_2BL_TGACv1_129802_AA0396560	71	46	32	1834	765	1282	387	174	215	Late embryogenesis abundant protein, LEA-14
TRIAE_CS42_2BL_TGACv1_129841_AA0397780	2	2	4	142	64	113	11	16	14	NAC domain
TRIAE_CS42_2BL_TGACv1_129886_AA0398750	13	29	9	64	87	110	8051	12079	10438	consensus disorder prediction
TRIAE_CS42_2BL_TGACv1_129918_AA0399400	14	7	8	116	44	62	226	90	109	Cytochrome P450
TRIAE_CS42_2BL_TGACv1_130139_AA0404850	24	14	12	72	64	87	78	86	76	GRAM domain
TRIAE_CS42_2BL_TGACv1_130392_AA0410240	49	21	10	263	151	157	121	86	75	Zinc finger, RING/FYVE/PHD-type
TRIAE_CS42_2BL_TGACv1_130743_AA0417190	18	11	6	107	43	70	74	22	33	consensus disorder prediction
TRIAE_CS42_2BL_TGACv1_130814_AA0418260	1	0	0	42	21	28	12	4	7	Myb domain
TRIAE_CS42_2BL_TGACv1_131158_AA0423420	6	4	8	53	49	38	38	22	17	#N/A
TRIAE_CS42_2BL_TGACv1_131423_AA0427530	39	72	43	402	147	243	1078	717	628	Fatty acid hydroxylase
TRIAE_CS42_2BL_TGACv1_131457_AA0428060	11	10	9	244	128	170	48	36	55	CO/COL/TOC1, conserved site
TRIAE_CS42_2BL_TGACv1_131657_AA0430340	285	158	231	3391	1400	2946	1424	1443	2375	Phenylalanine ammonia-lyase, shielding domain
TRIAE_CS42_2BL_TGACv1_131876_AA0433150	20	36	23	276	99	207	165	79	97	Hypoxia induced protein, domain
TRIAE_CS42_2BL_TGACv1_132304_AA0436650	94	42	143	699	757	565	486	305	806	Glycerophosphodiester phosphodiesterase domain
TRIAE_CS42_2BL_TGACv1_133225_AA0441930	13	11	13	79	45	72	74	19	44	Phytocyanin
TRIAE_CS42_2BL_TGACv1_133232_AA0441960	17	12	16	78	83	61	94	38	47	Small auxin-up RNA
TRIAE_CS42_2BL_TGACv1_134379_AA0444050	12	9	6	75	83	74	405	176	128	#N/A
TRIAE_CS42_2BL_TGACv1_134884_AA0444490	2	2	3	16	13	13	16	13	14	Myc-type, basic helix-loop-helix (bHLH) domain
TRIAE_CS42_2BS_TGACv1_145956_AA0450690	3	4	4	18	32	36	11	18	25	consensus disorder prediction
TRIAE_CS42_2BS_TGACv1_145963_AA0450940	413	689	844	13363	7912	12961	18655	3407	4752	Cytochrome P450
TRIAE_CS42_2BS_TGACv1_145966_AA0451020	0	2	0	69	57	62	61	82	68	#N/A
TRIAE_CS42_2BS_TGACv1_146029_AA0453490	46	60	88	600	416	483	600	343	313	Trehalose-phosphatase
TRIAE_CS42_2BS_TGACv1_146118_AA0455720	7	3	5	177	117	88	103	87	179	consensus disorder prediction
TRIAE_CS42_2BS_TGACv1_146175_AA0457360	20	14	27	6124	4669	6390	451	155	207	Cytochrome P450
TRIAE_CS42_2BS_TGACv1_146175_AA0457370	531	347	379	7658	4170	7244	2054	1452	2008	Cytochrome P450
TRIAE_CS42_2BS_TGACv1_146248_AA0460220	0	0	0	20	12	15	422	320	192	consensus disorder prediction
TRIAE_CS42_2BS_TGACv1_146251_AA0460280	2	1	15	25	22	41	53	76	110	#N/A
TRIAE_CS42_2BS_TGACv1_146276_AA0461230	2	6	3	35	104	69	3414	5731	4140	UDP-glucuronosyl/UDP-glucosyltransferase
TRIAE_CS42_2BS_TGACv1_146276_AA0461240	3	6	2	17	34	28	2458	4279	2714	#N/A
TRIAE_CS42_2BS_TGACv1_146286_AA0461540	1	4	2	18	26	22	2432	4108	2633	#N/A
TRIAE_CS42_2BS_TGACv1_146299_AA0461810	316	331	318	3376	2150	3036	1384	1463	1832	Triose phosphate/phosphoenolpyruvate translocator
TRIAE_CS42_2BS_TGACv1_146484_AA0466280	4	15	3	42	20	55	91	35	52	Jacalin-like lectin domain
TRIAE_CS42_2BS_TGACv1_146516_AA0467290	41	45	39	325	153	281	327	462	623	Alpha/Beta hydrolase fold
TRIAE_CS42_2BS_TGACv1_146564_AA0468320	219	240	373	1483	1280	1075	1138	1787	1906	Major facilitator superfamily domain
TRIAE_CS42_2BS_TGACv1_146749_AA0472060	3	1	0	28	29	24	688	1116	879	consensus disorder prediction
TRIAE_CS42_2BS_TGACv1_146798_AA0473050	9	2	3	120	112	100	101	46	61	pepsin_A_like_plant
TRIAE_CS42_2BS_TGACv1_146898_AA0475080	254	239	265	1159	927	1144	873	844	1244	consensus disorder prediction
TRIAE_CS42_2BS_TGACv1_147022_AA0476710	76	96	60	828	167	381	889	763	569	Glycosyl transferase, family 8
TRIAE_CS42_2BS_TGACv1_147287_AA0481160	19	31	39	179	119	165	360	146	210	Disease resistance protein signature
TRIAE_CS42_2BS_TGACv1_147292_AA0481270	148	173	134	997	734	749	670	678	579	Serine-threonine/tyrosine-protein kinase catalytic domain
TRIAE_CS42_2BS_TGACv1_147816_AA0487950	82	84	56	1942	1654	1613	2010	488	567	UDP-glucuronosyl/UDP-glucosyltransferase
TRIAE_CS42_2BS_TGACv1_148165_AA0491120	63	64	86	2877	2024	2299	425	325	310	Thioredoxin-like fold
TRIAE_CS42_2BS_TGACv1_148207_AA0491330	4	2	4	56	119	65	4546	6929	4993	#N/A
TRIAE_CS42_2BS_TGACv1_148526_AA0493470	39	14	38	659	1017	793	196	455	492	F-box domain
TRIAE_CS42_2BS_TGACv1_148599_AA0494010	11	14	7	80	61	49	110	118	107	Phospholipase A2 domain
TRIAE_CS42_2BS_TGACv1_148740_AA0494900	149	121	319	900	894	991	1082	1506	1668	consensus disorder prediction
TRIAE_CS42_2DL_TGACv1_158051_AA0507370	274	125	502	1731	1238	2040	1743	855	2109	BTB/POZ domain
TRIAE_CS42_2DL_TGACv1_158056_AA0507510	5	5	8	61	35	53	21	36	13	GRX_GRXh_1_2_like
TRIAE_CS42_2DL_TGACv1_158191_AA0511930	9	5	3	41	33	33	37	36	34	AP2/ERF domain
TRIAE_CS42_2DL_TGACv1_158205_AA0512310	0	0	0	39	64	33	8	22	32	HSP20-like chaperone
TRIAE_CS42_2DL_TGACv1_158333_AA0515860	363	222	232	3385	1620	2971	1770	731	803	#N/A
TRIAE_CS42_2DL_TGACv1_158616_AA0523230	16	0	2	23	32	23	30	47	61	#N/A
TRIAE_CS42_2DL_TGACv1_158641_AA0523830	3	4	0	94	46	93	28	27	26	consensus disorder prediction
TRIAE_CS42_2DL_TGACv1_158897_AA0528080	217	258	263	4821	1988	3547	1215	1229	1351	#N/A
TRIAE_CS42_2DL_TGACv1_159015_AA0530600	3	1	3	62	50	44	53	14	18	Homeodomain-like
TRIAE_CS42_2DL_TGACv1_159218_AA0534700	143	127	188	964	1368	871	999	1111	997	AP2/ERF domain
TRIAE_CS42_2DL_TGACv1_159362_AA0537130	214	162	138	4269	2179	3521	1309	805	1058	consensus disorder prediction
TRIAE_CS42_2DL_TGACv1_159535_AA0539510	26	17	21	469	353	486	131	52	66	Hypoxia induced protein, domain
TRIAE_CS42_2DL_TGACv1_159544_AA0539590	7	7	3	37	19	19	76	90	72	consensus disorder prediction
TRIAE_CS42_2DL_TGACv1_159678_AA0541380	32	9	60	268	128	223	92	106	159	consensus disorder prediction
TRIAE_CS42_2DL_TGACv1_159812_AA0543040	91	81	90	849	468	856	1492	527	496	UDP-glucuronosyl/UDP-glucosyltransferase
TRIAE_CS42_2DL_TGACv1_159933_AA0544600	29	33	82	442	316	467	304	390	377	consensus disorder prediction
TRIAE_CS42_2DL_TGACv1_160264_AA0548810	38	14	18	1134	576	695	288	158	254	Tify domain
TRIAE_CS42_2DL_TGACv1_160314_AA0549250	0	0	0	5	5	5	5	14	13	#N/A
TRIAE_CS42_2DL_TGACv1_160509_AA0551280	101	140	110	1602	649	915	1665	1098	1292	Cytochrome P450
TRIAE_CS42_2DL_TGACv1_160660_AA0552830	100	59	59	559	363	434	1007	403	309	Glutathione S-transferase, C-terminal-like
TRIAE_CS42_2DL_TGACv1_161295_AA0557770	274	259	281	4663	3179	4071	2702	879	948	Thioredoxin-like fold
TRIAE_CS42_2DL_TGACv1_161646_AA0559770	84	44	83	2308	1978	2226	573	270	260	UDP-glucuronosyl/UDP-glucosyltransferase
TRIAE_CS42_2DL_TGACv1_162116_AA0561930	6	6	3	47	26	24	55	26	15	#N/A
TRIAE_CS42_2DL_TGACv1_162315_AA0562440	76	65	99	25903	13656	19758	1649	471	896	Alternative oxidase
TRIAE_CS42_2DL_TGACv1_162396_AA0562610	3	11	2	95	105	75	887	1131	1019	#N/A
TRIAE_CS42_2DS_TGACv1_177229_AA0569580	29	40	36	6586	5475	7447	2796	632	661	Cytochrome P450
TRIAE_CS42_2DS_TGACv1_177274_AA0571740	194	219	192	3491	2164	3018	1467	874	1109	Cytochrome P450
TRIAE_CS42_2DS_TGACv1_177403_AA0575960	21	21	36	1892	1163	1602	185	73	51	#N/A
TRIAE_CS42_2DS_TGACv1_177422_AA0576700	17	18	28	193	185	165	178	97	122	Winged helix-turn-helix DNA-binding domain
TRIAE_CS42_2DS_TGACv1_177437_AA0577150	34	22	37	206	85	182	1203	567	741	consensus disorder prediction
TRIAE_CS42_2DS_TGACv1_177487_AA0578450	175	128	99	1059	564	840	814	1167	1546	Alpha/Beta hydrolase fold
TRIAE_CS42_2DS_TGACv1_177502_AA0578910	144	162	263	4449	2387	3375	2376	705	650	Methyltransferase type 11
TRIAE_CS42_2DS_TGACv1_177520_AA0579220	24	12	20	5931	4018	4712	195	51	104	Cytochrome P450
TRIAE_CS42_2DS_TGACv1_177648_AA0581890	114	133	139	986	812	835	370	788	801	Sugar transporter, conserved site
TRIAE_CS42_2DS_TGACv1_177710_AA0582890	2	2	4	1528	1167	1302	125	68	30	#N/A
TRIAE_CS42_2DS_TGACv1_177755_AA0584020	39	65	41	610	400	477	266	284	241	Spg1
TRIAE_CS42_2DS_TGACv1_177760_AA0584150	43	44	40	359	141	179	438	677	399	Glycosyl transferase, family 8
TRIAE_CS42_2DS_TGACv1_178033_AA0589680	3	3	4	134	69	68	2246	3317	2181	UDP-glucuronosyl/UDP-glucosyltransferase
TRIAE_CS42_2DS_TGACv1_178082_AA0590470	9	18	9	100	83	51	173	102	103	Phospholipase A2 domain
TRIAE_CS42_2DS_TGACv1_178094_AA0590720	152	131	194	2324	1495	2032	815	1009	1083	#N/A
TRIAE_CS42_2DS_TGACv1_178118_AA0591100	5	3	5	936	669	693	112	36	28	#N/A
TRIAE_CS42_2DS_TGACv1_178325_AA0594160	64	49	88	636	598	614	816	1514	1643	consensus disorder prediction
TRIAE_CS42_2DS_TGACv1_178383_AA0594800	9	8	25	406	349	323	82	38	53	consensus disorder prediction
TRIAE_CS42_2DS_TGACv1_178470_AA0596050	0	0	0	4	6	5	9	3	5	DEAD/DEAH box helicase domain
TRIAE_CS42_2DS_TGACv1_178537_AA0597250	26	57	23	480	196	252	2039	2524	3132	Nucleotide-diphospho-sugar transferases
TRIAE_CS42_2DS_TGACv1_178757_AA0600610	8	3	0	44	51	14	24	14	24	Short-chain dehydrogenase/reductase SDR
TRIAE_CS42_2DS_TGACv1_179008_AA0603420	377	466	296	2440	1233	1861	2602	2800	3187	Heavy metal-associated domain, HMA
TRIAE_CS42_2DS_TGACv1_179236_AA0605510	12	8	9	196	130	133	53	32	67	WRKY domain
TRIAE_CS42_2DS_TGACv1_179339_AA0606280	24	46	14	470	320	400	3307	3157	2805	PP2Cc
TRIAE_CS42_2DS_TGACv1_180054_AA0610000	106	73	87	3929	3573	3551	873	406	235	consensus disorder prediction
TRIAE_CS42_3AL_TGACv1_193567_AA0613230	34	63	16	291	209	292	4256	5357	4231	consensus disorder prediction
TRIAE_CS42_3AL_TGACv1_193567_AA0613240	16	24	12	90	102	86	553	713	617	#N/A
TRIAE_CS42_3AL_TGACv1_193607_AA0614700	12	15	6	331	174	195	1354	2380	1760	Heat shock factor (HSF)-type, DNA-binding
TRIAE_CS42_3AL_TGACv1_193670_AA0617220	49	53	54	2140	1462	1683	531	520	934	#N/A
TRIAE_CS42_3AL_TGACv1_193782_AA0619690	2	2	0	31	38	33	441	504	315	#N/A
TRIAE_CS42_3AL_TGACv1_193824_AA0620270	73	28	40	594	383	553	266	131	207	EF-hand domain pair
TRIAE_CS42_3AL_TGACv1_193835_AA0620520	27	29	29	165	147	145	119	108	99	S-adenosyl-L-methionine-dependent methyltransferase
TRIAE_CS42_3AL_TGACv1_193856_AA0621010	1	5	4	52	23	31	26	23	19	AP2/ERF domain
TRIAE_CS42_3AL_TGACv1_193889_AA0621900	15	7	20	47	78	59	59	91	97	Aspartic peptidase domain
TRIAE_CS42_3AL_TGACv1_194090_AA0626170	1	1	2	10	10	13	13	26	11	#N/A
TRIAE_CS42_3AL_TGACv1_194099_AA0626450	68	76	86	779	366	722	1229	912	962	#N/A
TRIAE_CS42_3AL_TGACv1_194186_AA0628110	24	39	21	122	123	107	218	198	154	Zf-FLZ domain
TRIAE_CS42_3AL_TGACv1_194298_AA0630730	147	121	134	5494	3490	4423	828	531	460	AAA+ ATPase domain
TRIAE_CS42_3AL_TGACv1_194363_AA0631800	47	24	73	2527	1769	1782	596	414	430	FAD-binding, type 2
TRIAE_CS42_3AL_TGACv1_194443_AA0633160	333	259	460	4112	4079	4650	1227	1324	1257	UDP-glucuronosyl/UDP-glucosyltransferase
TRIAE_CS42_3AL_TGACv1_194476_AA0633730	3	4	5	17	23	17	17	13	14	#N/A
TRIAE_CS42_3AL_TGACv1_194527_AA0635080	1	6	2	15	13	14	45	30	33	Zinc finger, C2H2
TRIAE_CS42_3AL_TGACv1_194694_AA0637990	0	1	2	18	21	11	43	46	64	#N/A
TRIAE_CS42_3AL_TGACv1_194859_AA0640810	193	166	157	1247	735	829	902	706	709	Regulator of chromosome condensation 1/beta-lactamase-inhibitor protein II
TRIAE_CS42_3AL_TGACv1_194877_AA0641260	56	46	64	458	401	370	1239	912	939	consensus disorder prediction
TRIAE_CS42_3AL_TGACv1_194893_AA0641610	147	151	563	6852	7179	6350	3050	1966	3198	consensus disorder prediction
TRIAE_CS42_3AL_TGACv1_195024_AA0643600	109	96	161	791	680	733	879	1191	925	Diacylglycerol kinase, catalytic domain
TRIAE_CS42_3AL_TGACv1_195097_AA0644720	218	173	277	3471	2205	2144	1763	1465	1556	Oxoglutarate/iron-dependent dioxygenase
TRIAE_CS42_3AL_TGACv1_195183_AA0646060	6	1	1	125	203	158	22	9	7	Flavoprotein-like domain
TRIAE_CS42_3AL_TGACv1_195184_AA0646080	136	110	186	3202	1719	2530	1368	634	941	Protein of unknown function DUF1645, plant
TRIAE_CS42_3AL_TGACv1_195712_AA0653000	137	114	134	1507	1908	1819	1253	636	568	Glutathione S-transferase, C-terminal-like
TRIAE_CS42_3AL_TGACv1_195781_AA0653850	4	4	1	23	24	19	32	42	41	Serpin domain
TRIAE_CS42_3AL_TGACv1_195804_AA0654230	4	2	1	20	12	29	20	39	41	Tubby C-terminal-like domain
TRIAE_CS42_3AL_TGACv1_195910_AA0655580	25	38	31	245	92	172	257	192	214	Cytokinin riboside 5'-monophosphate phosphoribohydrolase LOG
TRIAE_CS42_3AL_TGACv1_196210_AA0658310	30	38	18	402	317	520	3306	1469	1170	Domain unknown function DUF295
TRIAE_CS42_3AL_TGACv1_196306_AA0659310	2	2	3	30	38	26	20	11	12	Pre-SET domain
TRIAE_CS42_3AL_TGACv1_196503_AA0660930	125	128	234	6191	3734	4873	2690	590	1039	ABC transporter, conserved site
TRIAE_CS42_3AL_TGACv1_196840_AA0663220	26	17	12	624	461	491	844	946	1164	Protein kinase domain
TRIAE_CS42_3AL_TGACv1_196871_AA0663410	9	11	6	51	26	40	57	101	44	consensus disorder prediction
TRIAE_CS42_3AL_TGACv1_197045_AA0664510	878	877	885	6035	3049	5504	4150	2476	3191	#N/A
TRIAE_CS42_3AL_TGACv1_197181_AA0665310	63	44	88	462	334	401	204	274	250	consensus disorder prediction
TRIAE_CS42_3AL_TGACv1_197336_AA0665880	376	419	399	4832	2818	3678	2182	1121	1042	consensus disorder prediction
TRIAE_CS42_3AL_TGACv1_197370_AA0666070	140	107	158	1023	379	1166	2700	987	1388	#N/A
TRIAE_CS42_3AL_TGACv1_197844_AA0667390	15	25	18	151	65	114	104	50	57	Ribonuclease CAF1
TRIAE_CS42_3AL_TGACv1_198419_AA0668610	20	10	23	227	223	156	63	47	82	consensus disorder prediction
TRIAE_CS42_3AL_TGACv1_199326_AA0669650	413	570	304	3341	2358	2540	6496	6700	6731	PP2Cc
TRIAE_CS42_3AS_TGACv1_210427_AA0671780	9	21	15	94	27	86	729	183	412	Cytochrome P450
TRIAE_CS42_3AS_TGACv1_210643_AA0676220	22	26	34	183	132	163	685	858	823	Mitochondrial carrier domain
TRIAE_CS42_3AS_TGACv1_210681_AA0676990	1	2	1	73	86	87	39	92	123	Alpha crystallin/Hsp20 domain
TRIAE_CS42_3AS_TGACv1_210800_AA0679380	0	0	0	179	226	183	19	9	11	HSP20-like chaperone
TRIAE_CS42_3AS_TGACv1_210809_AA0679530	160	133	160	1372	835	1191	1604	588	581	Short-chain dehydrogenase/reductase SDR
TRIAE_CS42_3AS_TGACv1_210809_AA0679610	1	2	2	29	46	43	162	104	63	Alpha crystallin/Hsp20 domain
TRIAE_CS42_3AS_TGACv1_210853_AA0680280	33	32	37	576	421	469	255	190	132	consensus disorder prediction
TRIAE_CS42_3AS_TGACv1_210974_AA0682350	563	253	347	2355	1636	2099	3286	3505	3379	Arabinogalactan peptide, AGP
TRIAE_CS42_3AS_TGACv1_211303_AA0688210	303	248	369	3473	1708	2315	1809	1054	1444	consensus disorder prediction
TRIAE_CS42_3AS_TGACv1_211530_AA0691240	408	273	452	4114	3505	4008	3929	1577	1191	UDP-glucuronosyl/UDP-glucosyltransferase
TRIAE_CS42_3AS_TGACv1_211574_AA0691730	237	299	391	2030	603	1739	2060	1097	2080	Cytochrome P450
TRIAE_CS42_3AS_TGACv1_211663_AA0692670	0	0	0	4	8	3	66	5	28	GATase1_2
TRIAE_CS42_3AS_TGACv1_211725_AA0693400	180	152	231	1484	533	977	6312	8105	6397	Glycosyl hydrolases 36
TRIAE_CS42_3AS_TGACv1_211816_AA0694560	6	8	9	706	802	642	202	96	82	ACD_sHsps-like
TRIAE_CS42_3AS_TGACv1_211884_AA0695230	4	2	10	108	221	142	560	385	365	Class I glutamine amidotransferase-like
TRIAE_CS42_3AS_TGACv1_212016_AA0696780	42	32	29	553	298	254	933	2052	1626	Alpha/Beta hydrolase fold
TRIAE_CS42_3AS_TGACv1_212070_AA0697360	131	66	82	756	249	455	424	346	446	SGNH_plant_lipase_like
TRIAE_CS42_3AS_TGACv1_212093_AA0697650	590	349	329	4150	2541	3521	2151	2167	2042	EF-hand domain
TRIAE_CS42_3AS_TGACv1_212317_AA0699890	23	25	42	116	171	164	168	105	90	Chloramphenicol acetyltransferase-like domain
TRIAE_CS42_3AS_TGACv1_213446_AA0707010	81	83	91	1652	748	1490	1828	1314	1078	Alpha/beta hydrolase fold-3
TRIAE_CS42_3AS_TGACv1_214212_AA0708480	24	24	44	252	155	176	145	154	123	Protein of unknown function DUF1639
TRIAE_CS42_3B_TGACv1_220649_AA0713760	215	104	251	2111	1537	2039	1258	1238	1194	Glutaredoxin
TRIAE_CS42_3B_TGACv1_220699_AA0715850	978	1008	784	10133	5370	7286	6351	4349	4463	Cytochrome P450
TRIAE_CS42_3B_TGACv1_220700_AA0715960	81	75	79	414	308	391	1314	1464	1423	Mitochondrial substrate/solute carrier
TRIAE_CS42_3B_TGACv1_220718_AA0716570	52	129	91	1576	917	1362	521	534	584	Zinc finger, TAZ-type
TRIAE_CS42_3B_TGACv1_220746_AA0717870	316	209	262	5126	2700	3909	1328	920	1158	consensus disorder prediction
TRIAE_CS42_3B_TGACv1_220765_AA0718620	2	4	2	64	42	31	40	41	37	#N/A
TRIAE_CS42_3B_TGACv1_220882_AA0722380	2	5	0	18	22	28	185	155	150	Winged helix-turn-helix DNA-binding domain
TRIAE_CS42_3B_TGACv1_220890_AA0722780	1399	1499	1800	14977	11949	14679	8617	6422	5480	Cytochrome P450
TRIAE_CS42_3B_TGACv1_220919_AA0723690	26	13	44	714	1124	1010	881	256	152	#N/A
TRIAE_CS42_3B_TGACv1_220989_AA0726075	300	154	168	1327	744	1164	3338	3660	4025	Arabinogalactan peptide, AGP
TRIAE_CS42_3B_TGACv1_221052_AA0728390	3	5	6	55	72	42	28	27	22	NAC domain
TRIAE_CS42_3B_TGACv1_221078_AA0729510	2	2	0	53	98	80	18	26	13	Alpha crystallin/Hsp20 domain
TRIAE_CS42_3B_TGACv1_221177_AA0733010	18	14	10	387	175	198	117	99	80	Zinc finger, CCCH-type
TRIAE_CS42_3B_TGACv1_221246_AA0735060	50	37	56	1150	1037	1098	378	206	170	Glutathione S-transferase, C-terminal-like
TRIAE_CS42_3B_TGACv1_221271_AA0735820	2	9	7	46	78	45	1887	2991	2320	#N/A
TRIAE_CS42_3B_TGACv1_221323_AA0737350	27	58	29	278	144	167	328	224	165	pepsin_A_like_plant
TRIAE_CS42_3B_TGACv1_221373_AA0738640	466	533	549	3554	3216	4053	3029	1520	1829	#N/A
TRIAE_CS42_3B_TGACv1_221429_AA0740530	2	1	1	26	27	26	65	56	42	#N/A
TRIAE_CS42_3B_TGACv1_221666_AA0746940	4	12	9	613	730	628	135	35	47	Alpha crystallin/Hsp20 domain
TRIAE_CS42_3B_TGACv1_221765_AA0749500	433	238	268	2838	1935	2072	1273	1064	1309	WRKY domain
TRIAE_CS42_3B_TGACv1_221836_AA0751040	707	834	793	5415	4528	6398	6061	4741	3899	NAD(P)-binding domain
TRIAE_CS42_3B_TGACv1_221929_AA0753420	0	2	1	250	202	255	24	9	12	consensus disorder prediction
TRIAE_CS42_3B_TGACv1_221974_AA0754150	1	2	0	24	6	13	51	258	328	#N/A
TRIAE_CS42_3B_TGACv1_222057_AA0756170	8	1	5	27	28	34	28	13	21	EGF-like calcium-binding domain
TRIAE_CS42_3B_TGACv1_222176_AA0758950	3	0	0	99	108	84	14	4	9	HSP20-like chaperone
TRIAE_CS42_3B_TGACv1_222275_AA0760960	7	17	5	215	189	138	4565	6545	4707	#N/A
TRIAE_CS42_3B_TGACv1_222344_AA0762570	67	148	59	604	277	375	1273	1313	1062	consensus disorder prediction
TRIAE_CS42_3B_TGACv1_222583_AA0767250	143	241	183	1090	894	506	1886	941	552	#N/A
TRIAE_CS42_3B_TGACv1_222685_AA0768900	10	9	11	504	73	204	231	278	292	Glycoside hydrolase superfamily
TRIAE_CS42_3B_TGACv1_222879_AA0772310	23	6	6	624	626	501	55	40	74	#N/A
TRIAE_CS42_3B_TGACv1_222879_AA0772320	28	32	31	378	346	311	367	252	344	STKc_MAPKKK
TRIAE_CS42_3B_TGACv1_222891_AA0772640	170	127	311	4148	3147	3399	1753	1614	1550	Oxoglutarate/iron-dependent dioxygenase
TRIAE_CS42_3B_TGACv1_222971_AA0774430	24	19	15	107	53	93	551	554	654	consensus disorder prediction
TRIAE_CS42_3B_TGACv1_222993_AA0774760	1	1	0	34	38	27	14	19	16	#N/A
TRIAE_CS42_3B_TGACv1_223082_AA0776210	4	1	3	16	27	35	444	118	155	Thioredoxin-like fold
TRIAE_CS42_3B_TGACv1_223174_AA0777390	64	81	194	6085	6552	5343	1948	848	1634	NAC domain
TRIAE_CS42_3B_TGACv1_223254_AA0779030	10	7	1	57	35	51	27	15	25	EF-hand domain
TRIAE_CS42_3B_TGACv1_223389_AA0781480	40	20	52	275	292	301	288	396	354	Late embryogenesis abundant protein, LEA5-type
TRIAE_CS42_3B_TGACv1_223455_AA0782520	0	1	1	13	13	13	17	8	6	#N/A
TRIAE_CS42_3B_TGACv1_223615_AA0784590	70	83	88	592	334	448	301	422	527	F-box domain
TRIAE_CS42_3B_TGACv1_223778_AA0787050	46	57	53	4244	3089	3522	334	272	218	AAA+ ATPase domain
TRIAE_CS42_3B_TGACv1_223927_AA0789730	252	234	230	2700	799	1449	1053	672	819	consensus disorder prediction
TRIAE_CS42_3B_TGACv1_224115_AA0792490	154	160	240	2106	1091	1611	1871	1507	1445	#N/A
TRIAE_CS42_3B_TGACv1_224578_AA0798300	6	3	3	55	28	13	32	25	35	#N/A
TRIAE_CS42_3B_TGACv1_224655_AA0799460	101	118	125	961	934	881	613	615	675	Protein of unknown function DUF4228, plant
TRIAE_CS42_3B_TGACv1_224721_AA0800650	1	6	12	36	31	25	785	768	650	Protein of unknown function DUF599
TRIAE_CS42_3B_TGACv1_224830_AA0802110	70	87	67	548	356	381	570	169	234	Concanavalin A-like lectin/glucanase domain
TRIAE_CS42_3B_TGACv1_225193_AA0806030	31	27	30	1640	1006	1316	129	148	257	#N/A
TRIAE_CS42_3B_TGACv1_225319_AA0807040	4	3	4	160	78	104	77	49	78	Protein kinase domain
TRIAE_CS42_3B_TGACv1_225386_AA0807820	1	0	0	43	35	56	47	44	30	Zinc finger, C2H2
TRIAE_CS42_3B_TGACv1_225481_AA0808930	3	3	1	35	94	73	117	307	241	Alpha crystallin/Hsp20 domain
TRIAE_CS42_3B_TGACv1_225498_AA0809080	189	137	176	979	463	853	901	362	697	UDP-glucuronosyl/UDP-glucosyltransferase
TRIAE_CS42_3B_TGACv1_225517_AA0809330	0	1	5	21	16	22	43	22	24	Protein kinase domain
TRIAE_CS42_3B_TGACv1_225534_AA0809490	4	3	1	18	19	15	133	66	87	BTB/POZ domain
TRIAE_CS42_3B_TGACv1_225919_AA0812920	8	7	19	87	48	102	331	206	229	Class I glutamine amidotransferase-like
TRIAE_CS42_3B_TGACv1_225919_AA0812940	1	0	4	17	14	22	37	25	38	GATase1_2
TRIAE_CS42_3B_TGACv1_226451_AA0816990	297	438	241	3232	2483	2611	6258	6580	6837	PP2Cc
TRIAE_CS42_3B_TGACv1_226949_AA0820320	9	13	11	690	456	647	107	94	91	consensus disorder prediction
TRIAE_CS42_3B_TGACv1_227074_AA0821270	396	444	413	3495	2866	3121	2037	1402	1566	AAA+ ATPase domain
TRIAE_CS42_3B_TGACv1_227670_AA0824300	2	0	0	29	25	22	14	7	15	#N/A
TRIAE_CS42_3B_TGACv1_227755_AA0824610	25	26	27	293	208	216	156	86	83	#N/A
TRIAE_CS42_3B_TGACv1_227885_AA0825060	70	57	70	402	347	381	475	662	552	NAD kinase/diacylglycerol kinase-like domain
TRIAE_CS42_3B_TGACv1_231893_AA0830930	2	2	4	30	22	27	20	8	8	#N/A
TRIAE_CS42_3DL_TGACv1_249061_AA0836520	6	5	6	30	26	27	54	55	50	RING
TRIAE_CS42_3DL_TGACv1_249103_AA0837810	204	225	243	1664	1336	1219	1276	1715	1158	X8 domain
TRIAE_CS42_3DL_TGACv1_249134_AA0839110	90	43	54	303	217	279	523	167	207	EF-hand domain
TRIAE_CS42_3DL_TGACv1_249177_AA0840480	81	104	101	758	779	714	522	457	576	Protein of unknown function DUF4228, plant
TRIAE_CS42_3DL_TGACv1_249262_AA0843480	378	454	306	4231	3434	3068	6771	6826	6695	PPM-type phosphatase domain
TRIAE_CS42_3DL_TGACv1_249276_AA0843870	80	76	79	594	288	535	719	313	460	Glutathione S-transferase, C-terminal-like
TRIAE_CS42_3DL_TGACv1_249285_AA0844270	45	42	57	2478	1831	1886	709	514	529	FAD-binding, type 2
TRIAE_CS42_3DL_TGACv1_249304_AA0844730	151	85	161	2936	1673	2328	1112	559	845	consensus disorder prediction
TRIAE_CS42_3DL_TGACv1_249381_AA0847160	17	11	23	122	82	145	915	835	931	consensus disorder prediction
TRIAE_CS42_3DL_TGACv1_249436_AA0848690	137	108	95	1040	676	751	695	445	392	#N/A
TRIAE_CS42_3DL_TGACv1_249456_AA0849160	2	1	2	24	20	22	16	17	16	#N/A
TRIAE_CS42_3DL_TGACv1_249496_AA0850070	33	50	12	563	340	422	4740	5636	5115	consensus disorder prediction
TRIAE_CS42_3DL_TGACv1_249526_AA0850830	0	1	0	11	8	11	17	28	17	Plant peroxidase
TRIAE_CS42_3DL_TGACv1_249658_AA0853660	0	3	1	42	38	36	24	13	7	EF-hand domain
TRIAE_CS42_3DL_TGACv1_249699_AA0854620	94	43	54	2543	2010	2105	755	800	1031	Protein kinase domain
TRIAE_CS42_3DL_TGACv1_249782_AA0856230	4	11	2	43	84	72	1367	575	404	NAD(P)-binding domain
TRIAE_CS42_3DL_TGACv1_249799_AA0856660	0	0	0	7	6	24	7	11	12	Mrs2_Mfm1p-like
TRIAE_CS42_3DL_TGACv1_249811_AA0856750	2	0	0	112	74	75	665	1146	831	F-box domain
TRIAE_CS42_3DL_TGACv1_250022_AA0860570	244	86	254	1227	1158	1176	764	803	854	Glutaredoxin
TRIAE_CS42_3DL_TGACv1_250303_AA0865710	45	46	104	308	310	238	263	356	315	Protein of unknown function DUF761, plant
TRIAE_CS42_3DL_TGACv1_250354_AA0866690	2	2	1	9	10	20	31	34	14	consensus disorder prediction
TRIAE_CS42_3DL_TGACv1_250387_AA0867350	75	80	128	696	240	778	1968	712	1192	Zinc finger, C2H2
TRIAE_CS42_3DL_TGACv1_250395_AA0867450	84	87	127	1023	773	789	788	778	578	AAA domain
TRIAE_CS42_3DL_TGACv1_250562_AA0870310	166	135	331	1510	1104	1259	1813	1685	1880	Isopenicillin N synthase-like
TRIAE_CS42_3DL_TGACv1_250564_AA0870320	2	10	13	67	26	37	215	54	77	AP2/ERF domain
TRIAE_CS42_3DL_TGACv1_250625_AA0871190	102	96	267	10075	9022	8714	2676	1473	2449	NAC domain
TRIAE_CS42_3DL_TGACv1_250779_AA0873000	11	14	11	102	79	91	1283	2608	2149	consensus disorder prediction
TRIAE_CS42_3DL_TGACv1_251034_AA0876370	77	39	42	955	529	853	282	120	267	EF-hand domain
TRIAE_CS42_3DL_TGACv1_251122_AA0877690	0	1	0	139	73	83	30	12	26	INHIBITOR PROTEASE CYSTEINE PROTEINASE CYSTATIN THIOL MULTICYSTATIN MC REPEAT B
TRIAE_CS42_3DL_TGACv1_251344_AA0880410	9	6	2	63	54	48	15	30	39	2Fe-2S ferredoxin-type iron-sulfur binding domain
TRIAE_CS42_3DL_TGACv1_251482_AA0881890	35	11	43	439	209	341	399	168	253	GST_C_Tau
TRIAE_CS42_3DL_TGACv1_251482_AA0881900	21	21	25	407	548	392	251	140	90	GST_N_Tau
TRIAE_CS42_3DL_TGACv1_251482_AA0881910	152	135	119	2491	1902	2357	778	474	332	Thioredoxin-like fold
TRIAE_CS42_3DL_TGACv1_251485_AA0881960	28	20	20	150	72	181	120	171	123	Serpin domain
TRIAE_CS42_3DL_TGACv1_251724_AA0884250	424	556	663	6019	2928	4792	5935	4180	3701	consensus disorder prediction
TRIAE_CS42_3DL_TGACv1_251733_AA0884380	780	617	694	7348	4851	7043	3392	2334	3377	UDP-glucuronosyl/UDP-glucosyltransferase
TRIAE_CS42_3DL_TGACv1_251745_AA0884450	2	0	0	14	5	13	375	419	310	#N/A
TRIAE_CS42_3DL_TGACv1_252278_AA0889020	94	89	115	676	472	625	604	919	821	consensus disorder prediction
TRIAE_CS42_3DL_TGACv1_252357_AA0889540	62	54	53	1775	1761	1671	539	192	336	ABC transporter-like
TRIAE_CS42_3DL_TGACv1_252505_AA0890400	3	0	1	15	11	16	141	196	104	Reverse transcriptase zinc-binding domain
TRIAE_CS42_3DL_TGACv1_252505_AA0890410	0	2	0	30	29	35	285	449	221	Reverse transcriptase domain
TRIAE_CS42_3DL_TGACv1_252746_AA0891680	8	2	4	67	56	54	99	114	111	consensus disorder prediction
TRIAE_CS42_3DL_TGACv1_252837_AA0892250	16	11	27	138	235	270	364	188	98	UDP-glucuronosyl/UDP-glucosyltransferase
TRIAE_CS42_3DL_TGACv1_253186_AA0893720	23	32	36	153	151	173	152	121	93	Homeodomain-like
TRIAE_CS42_3DL_TGACv1_253277_AA0894020	1	2	1	62	68	42	17	20	17	#N/A
TRIAE_CS42_3DS_TGACv1_271534_AA0901640	0	5	2	93	99	109	20	17	24	HSP20-like chaperone
TRIAE_CS42_3DS_TGACv1_271534_AA0901650	12	35	16	810	659	836	365	523	463	Alpha crystallin/Hsp20 domain
TRIAE_CS42_3DS_TGACv1_271534_AA0901660	0	0	2	43	66	44	11	4	9	HSP20-like chaperone
TRIAE_CS42_3DS_TGACv1_271601_AA0903450	36	55	58	391	266	350	1176	1229	1034	Mitochondrial substrate/solute carrier
TRIAE_CS42_3DS_TGACv1_271649_AA0904750	9	11	25	84	45	76	122	88	104	Class I glutamine amidotransferase-like
TRIAE_CS42_3DS_TGACv1_271747_AA0907330	12	31	26	6564	4329	4385	533	300	218	#N/A
TRIAE_CS42_3DS_TGACv1_271986_AA0912330	62	54	54	1292	649	665	2271	3684	2610	Aldolase-type TIM barrel
TRIAE_CS42_3DS_TGACv1_271990_AA0912490	77	15	33	270	167	225	117	277	333	#N/A
TRIAE_CS42_3DS_TGACv1_272006_AA0913030	125	89	103	1405	1134	1218	1316	1277	946	consensus disorder prediction
TRIAE_CS42_3DS_TGACv1_272095_AA0914590	150	134	204	1589	1953	1995	3735	1484	960	GT1_Gtf_like
TRIAE_CS42_3DS_TGACv1_272121_AA0915220	0	0	0	34	46	33	24	17	14	HSP20-like chaperone
TRIAE_CS42_3DS_TGACv1_272166_AA0915970	453	324	643	4330	3332	4172	5107	5273	4840	Late embryogenesis abundant protein, LEA5-type
TRIAE_CS42_3DS_TGACv1_272324_AA0919020	310	148	250	1862	1332	1858	3128	3271	3454	#N/A
TRIAE_CS42_3DS_TGACv1_272365_AA0919640	52	22	11	451	318	374	107	93	101	EF-hand domain pair
TRIAE_CS42_3DS_TGACv1_272416_AA0920510	12	12	10	449	351	329	91	99	102	HSP20-like chaperone
TRIAE_CS42_3DS_TGACv1_272599_AA0922820	0	0	2	272	238	245	47	56	70	consensus disorder prediction
TRIAE_CS42_3DS_TGACv1_272742_AA0924550	3	7	5	34	31	22	17	23	15	consensus disorder prediction
TRIAE_CS42_3DS_TGACv1_272901_AA0926370	2	11	6	687	746	735	215	275	254	#N/A
TRIAE_CS42_3DS_TGACv1_273510_AA0931840	689	662	603	5531	3164	3820	3238	2315	2766	WRKY domain
TRIAE_CS42_3DS_TGACv1_273985_AA0934130	4	2	1	163	220	189	82	34	33	Alpha crystallin/Hsp20 domain
TRIAE_CS42_3DS_TGACv1_273985_AA0934140	3	0	0	121	206	150	24	15	24	ACD_sHsps-like
TRIAE_CS42_3DS_TGACv1_274373_AA0935620	6	6	6	698	492	704	433	63	99	Flavoprotein-like domain
TRIAE_CS42_3DS_TGACv1_274632_AA0936130	0	0	2	186	305	82	7	6	15	#N/A
TRIAE_CS42_3DS_TGACv1_277921_AA0937160	309	130	126	2906	2076	2231	1863	1448	1393	EF-hand domain pair
TRIAE_CS42_4AL_TGACv1_288311_AA0944420	5	1	1	211	158	170	23	19	27	Nucleotide-diphospho-sugar transferases
TRIAE_CS42_4AL_TGACv1_288481_AA0949930	203	150	288	1849	887	1596	1106	469	850	AP2/ERF domain
TRIAE_CS42_4AL_TGACv1_288539_AA0951460	63	57	52	270	262	312	1293	1526	1032	GST_N_Tau
TRIAE_CS42_4AL_TGACv1_288540_AA0951580	22	12	9	114	92	60	302	321	298	Serine aminopeptidase, S33
TRIAE_CS42_4AL_TGACv1_288876_AA0960340	5	1	7	19	20	33	39	10	34	#N/A
TRIAE_CS42_4AL_TGACv1_288956_AA0962050	173	143	128	4887	3135	4245	2060	1839	1848	Chloramphenicol acetyltransferase-like domain
TRIAE_CS42_4AL_TGACv1_289133_AA0965470	1759	1768	1328	9829	6654	6859	7337	4715	5425	Alanine racemase/group IV decarboxylase, C-terminal
TRIAE_CS42_4AL_TGACv1_289144_AA0965910	4	2	0	7	23	22	1596	2022	1760	#N/A
TRIAE_CS42_4AL_TGACv1_289430_AA0970950	19	13	5	149	56	60	250	303	218	Sodium/calcium exchanger membrane region
TRIAE_CS42_4AL_TGACv1_289634_AA0974460	19	14	9	68	76	65	148	170	191	Amino acid transporter, transmembrane domain
TRIAE_CS42_4AL_TGACv1_289676_AA0974980	2025	2605	2866	17267	7869	9017	10524	13865	12588	YbiR_permease
TRIAE_CS42_4AL_TGACv1_289771_AA0976640	0	2	2	10	31	22	188	310	214	consensus disorder prediction
TRIAE_CS42_4AL_TGACv1_289782_AA0976730	17	21	18	213	177	183	205	109	98	consensus disorder prediction
TRIAE_CS42_4AL_TGACv1_289784_AA0976810	4	6	0	40	19	18	46	23	28	#N/A
TRIAE_CS42_4AL_TGACv1_289830_AA0977440	6	5	5	35	50	22	19	48	45	Transposase (putative), gypsy type
TRIAE_CS42_4AL_TGACv1_289846_AA0977780	2	5	6	177	199	166	541	610	552	Alpha crystallin/Hsp20 domain
TRIAE_CS42_4AL_TGACv1_289858_AA0977890	364	325	417	2003	1413	1455	1647	2464	2343	Glycoside hydrolase family 17
TRIAE_CS42_4AL_TGACv1_289882_AA0978280	124	157	128	728	602	910	1969	1696	2035	Alpha/Beta hydrolase fold
TRIAE_CS42_4AL_TGACv1_289884_AA0978300	15	14	16	116	61	82	303	189	159	Oxoglutarate/iron-dependent dioxygenase
TRIAE_CS42_4AL_TGACv1_290011_AA0980440	24	16	17	198	123	138	179	278	295	#N/A
TRIAE_CS42_4AL_TGACv1_290130_AA0982040	37	42	57	615	187	424	413	374	603	consensus disorder prediction
TRIAE_CS42_4AL_TGACv1_290671_AA0988150	167	127	99	761	965	881	461	890	1221	SANT/Myb domain
TRIAE_CS42_4AL_TGACv1_290805_AA0989520	195	167	193	1306	878	1654	2474	759	908	Germin, manganese binding site
TRIAE_CS42_4AL_TGACv1_290814_AA0989610	134	65	62	1607	1363	1654	1566	748	897	Transferase
TRIAE_CS42_4AL_TGACv1_291203_AA0992820	6	10	9	74	24	34	398	246	426	Endonuclease/exonuclease/phosphatase
TRIAE_CS42_4AL_TGACv1_291355_AA0994160	49	75	45	340	247	447	372	121	171	Germin
TRIAE_CS42_4AL_TGACv1_291366_AA0994250	188	185	222	1521	1521	1465	1576	1554	1694	Major facilitator superfamily domain
TRIAE_CS42_4AL_TGACv1_291395_AA0994400	3	5	1	121	100	97	185	103	77	#N/A
TRIAE_CS42_4AL_TGACv1_291677_AA0996020	4	5	5	80	49	88	19	58	45	#N/A
TRIAE_CS42_4AL_TGACv1_297482_AA1002570	26	35	11	226	172	196	1128	1270	1258	#N/A
TRIAE_CS42_4AS_TGACv1_306563_AA1010230	1315	1192	1068	9030	4228	8405	5090	4236	5078	P-type ATPase, A domain
TRIAE_CS42_4AS_TGACv1_306619_AA1011070	175	491	653	3819	3131	4260	8443	2215	1999	Globin/Protoglobin
TRIAE_CS42_4AS_TGACv1_306643_AA1011400	1	2	1	105	118	129	71	10	22	HSP20-like chaperone
TRIAE_CS42_4AS_TGACv1_306669_AA1011840	142	137	152	4554	2637	3923	796	475	574	Serine O-acetyltransferase
TRIAE_CS42_4AS_TGACv1_306693_AA1012190	62	159	52	2128	1277	1486	10918	8049	6493	#N/A
TRIAE_CS42_4AS_TGACv1_306718_AA1012380	7	2	7	87	89	58	34	24	58	Zf-FLZ domain
TRIAE_CS42_4AS_TGACv1_306789_AA1013380	131	154	106	1017	651	771	929	1101	1185	consensus disorder prediction
TRIAE_CS42_4AS_TGACv1_306881_AA1014440	32	20	31	136	137	100	108	123	99	Cyclin-like
TRIAE_CS42_4AS_TGACv1_307021_AA1016220	14	9	7	68	42	52	206	278	164	consensus disorder prediction
TRIAE_CS42_4AS_TGACv1_307060_AA1016620	0	0	3	11	8	12	39	8	63	Coiled-coil domain containing protein 109, C-terminal
TRIAE_CS42_4AS_TGACv1_307146_AA1017580	2	1	8	27	14	28	14	13	22	Cyclin-like
TRIAE_CS42_4AS_TGACv1_307304_AA1019300	88	46	42	865	986	882	779	626	548	#N/A
TRIAE_CS42_4AS_TGACv1_307322_AA1019450	127	114	185	11787	7884	9403	1264	562	448	FAD/NAD(P)-binding domain
TRIAE_CS42_4AS_TGACv1_307330_AA1019560	9	9	6	85	44	65	39	29	44	Tify domain
TRIAE_CS42_4AS_TGACv1_307330_AA1019590	347	125	247	1989	1636	1658	1161	649	874	consensus disorder prediction
TRIAE_CS42_4AS_TGACv1_307507_AA1020930	6	9	7	37	28	42	77	136	95	Peptidase family A1 domain
TRIAE_CS42_4AS_TGACv1_307521_AA1021070	15	12	13	615	268	465	348	81	96	VQ
TRIAE_CS42_4AS_TGACv1_307652_AA1022370	8	9	3	87	93	71	364	293	194	consensus disorder prediction
TRIAE_CS42_4AS_TGACv1_307756_AA1023220	21	28	21	144	112	99	112	106	69	consensus disorder prediction
TRIAE_CS42_4AS_TGACv1_307993_AA1025080	27	19	19	343	146	279	172	120	158	#N/A
TRIAE_CS42_4AS_TGACv1_308413_AA1027820	224	210	584	5251	4539	4030	2193	1437	1558	Pyridoxal phosphate-dependent transferase, major region, subdomain 1
TRIAE_CS42_4AS_TGACv1_308833_AA1029630	50	30	35	1770	1811	1579	4815	5956	6437	PPM-type phosphatase domain
TRIAE_CS42_4AS_TGACv1_309211_AA1030590	11	34	5	99	130	111	11588	11815	7624	Late embryogenesis abundant protein LEA
TRIAE_CS42_4AS_TGACv1_309415_AA1030920	784	816	1109	7814	4879	6010	3270	3878	4411	#N/A
TRIAE_CS42_4BL_TGACv1_320257_AA1032680	6	7	2	66	58	52	1541	1963	1586	consensus disorder prediction
TRIAE_CS42_4BL_TGACv1_320276_AA1033600	97	82	207	6022	3721	4064	2031	1200	1607	Pyridoxal phosphate-dependent transferase
TRIAE_CS42_4BL_TGACv1_320289_AA1034070	25	34	7	175	162	186	1183	997	769	Winged helix-turn-helix DNA-binding domain
TRIAE_CS42_4BL_TGACv1_320328_AA1035500	56	45	60	7324	5117	5442	289	177	160	FAD/NAD(P)-binding domain
TRIAE_CS42_4BL_TGACv1_320435_AA1039000	50	22	22	1750	1776	1579	6602	7914	9230	PPM-type phosphatase, divalent cation binding
TRIAE_CS42_4BL_TGACv1_320443_AA1039400	1	3	2	123	97	60	259	409	379	consensus disorder prediction
TRIAE_CS42_4BL_TGACv1_320470_AA1040480	4	3	0	11	17	27	1196	1563	1134	Heat shock factor (HSF)-type, DNA-binding
TRIAE_CS42_4BL_TGACv1_320493_AA1041210	48	43	33	259	131	232	218	166	174	consensus disorder prediction
TRIAE_CS42_4BL_TGACv1_320493_AA1041220	52	29	23	208	65	213	165	105	133	consensus disorder prediction
TRIAE_CS42_4BL_TGACv1_320580_AA1043700	190	267	168	3154	1727	2007	908	968	865	consensus disorder prediction
TRIAE_CS42_4BL_TGACv1_320626_AA1045020	50	99	61	422	256	243	1987	2146	1401	Fatty acid hydroxylase
TRIAE_CS42_4BL_TGACv1_320634_AA1045210	145	139	105	745	544	592	1160	1934	1885	consensus disorder prediction
TRIAE_CS42_4BL_TGACv1_320641_AA1045350	51	54	48	272	205	198	2855	4089	3540	Glycoside hydrolase, catalytic domain
TRIAE_CS42_4BL_TGACv1_320675_AA1045990	17	17	9	79	96	127	1938	2201	1790	Heat shock factor (HSF)-type, DNA-binding
TRIAE_CS42_4BL_TGACv1_320685_AA1046210	70	89	80	507	286	389	382	353	274	SNARE associated Golgi protein
TRIAE_CS42_4BL_TGACv1_320819_AA1049430	18	16	13	128	48	91	217	53	73	P-type ATPase, cytoplasmic domain N
TRIAE_CS42_4BL_TGACv1_320819_AA1049450	499	361	363	4823	1829	4702	2107	1365	1741	HAD-like domain
TRIAE_CS42_4BL_TGACv1_321002_AA1053380	15	14	16	222	187	244	76	70	42	FAD/NAD(P)-binding domain
TRIAE_CS42_4BL_TGACv1_321069_AA1054650	32	120	22	1224	789	935	10695	6839	5090	#N/A
TRIAE_CS42_4BL_TGACv1_321325_AA1059030	402	402	403	7425	4058	4714	1876	1618	1717	#N/A
TRIAE_CS42_4BL_TGACv1_321400_AA1059880	4	14	4	31	56	43	5420	5075	2986	#N/A
TRIAE_CS42_4BL_TGACv1_321419_AA1060190	179	181	195	2620	2024	2042	749	725	694	HSP20-like chaperone
TRIAE_CS42_4BL_TGACv1_321434_AA1060340	7	6	3	249	59	170	33	21	53	Armadillo-type fold
TRIAE_CS42_4BL_TGACv1_321506_AA1061560	104	33	70	768	537	676	727	889	962	consensus disorder prediction
TRIAE_CS42_4BL_TGACv1_321617_AA1063140	4	8	7	514	376	426	87	38	58	RING
TRIAE_CS42_4BL_TGACv1_321627_AA1063340	34	41	30	284	191	186	683	1007	716	Senescence/spartin-associated
TRIAE_CS42_4BL_TGACv1_321831_AA1066030	19	7	10	400	124	259	373	110	107	consensus disorder prediction
TRIAE_CS42_4BL_TGACv1_321844_AA1066150	30	15	34	349	204	329	172	183	271	secoisolariciresinol-DH_like_SDR_c
TRIAE_CS42_4BL_TGACv1_321861_AA1066360	2	1	0	9	11	18	450	378	247	WD40-repeat-containing domain
TRIAE_CS42_4BL_TGACv1_321969_AA1067320	22	58	54	2204	1624	1686	416	95	208	HSP20-like chaperone
TRIAE_CS42_4BL_TGACv1_322078_AA1068370	315	367	248	3372	1528	2562	2215	2267	2120	consensus disorder prediction
TRIAE_CS42_4BL_TGACv1_322243_AA1069930	14	25	13	527	380	402	296	190	127	#N/A
TRIAE_CS42_4BL_TGACv1_322532_AA1071830	24	45	22	226	131	166	758	1251	1189	Myb domain
TRIAE_CS42_4BS_TGACv1_327835_AA1075690	25	16	15	421	273	309	1208	1615	1796	consensus disorder prediction
TRIAE_CS42_4BS_TGACv1_327870_AA1077090	526	595	1016	10148	5225	7893	5649	2257	2805	Poly(ADP-ribose) polymerase, catalytic domain
TRIAE_CS42_4BS_TGACv1_327885_AA1077740	3	9	7	58	48	72	1125	1543	1283	#N/A
TRIAE_CS42_4BS_TGACv1_327904_AA1078200	3	2	0	40	55	46	669	896	634	#N/A
TRIAE_CS42_4BS_TGACv1_328092_AA1082640	0	5	0	83	60	61	55	63	42	consensus disorder prediction
TRIAE_CS42_4BS_TGACv1_328152_AA1083600	9	9	6	809	740	532	79	36	30	Inosine triphosphate pyrophosphatase-like
TRIAE_CS42_4BS_TGACv1_328194_AA1084350	18	45	36	757	155	470	202	63	122	Vacuolar protein sorting-associated protein Ist1
TRIAE_CS42_4BS_TGACv1_328195_AA1084420	396	261	373	1612	1197	1916	3256	1828	1545	Germin
TRIAE_CS42_4BS_TGACv1_328344_AA1086580	95	113	103	575	361	476	574	536	474	consensus disorder prediction
TRIAE_CS42_4BS_TGACv1_328352_AA1086700	3	1	7	24	30	16	67	46	28	#N/A
TRIAE_CS42_4BS_TGACv1_328523_AA1089410	83	61	120	486	575	447	1767	765	717	#N/A
TRIAE_CS42_4BS_TGACv1_328532_AA1089710	15	15	17	257	319	264	261	149	147	VQ
TRIAE_CS42_4BS_TGACv1_328561_AA1090060	598	602	484	6154	4315	5039	2340	2046	2092	#N/A
TRIAE_CS42_4BS_TGACv1_328815_AA1094040	5	5	3	59	77	53	422	810	637	Amino acid transporter, transmembrane domain
TRIAE_CS42_4BS_TGACv1_328846_AA1094470	0	1	1	5	7	16	57	67	62	consensus disorder prediction
TRIAE_CS42_4BS_TGACv1_328846_AA1094490	16	14	20	178	125	155	189	210	228	#N/A
TRIAE_CS42_4BS_TGACv1_329517_AA1102190	70	105	40	367	353	339	1214	1486	997	P-loop containing nucleoside triphosphate hydrolase
TRIAE_CS42_4BS_TGACv1_329520_AA1102250	8	11	16	104	88	66	187	149	84	#N/A
TRIAE_CS42_4BS_TGACv1_329625_AA1102780	21	13	18	119	84	150	173	152	87	consensus disorder prediction
TRIAE_CS42_4BS_TGACv1_329761_AA1103770	4	3	13	93	116	101	1485	1882	2026	#N/A
TRIAE_CS42_4BS_TGACv1_330329_AA1107230	7	7	12	538	550	444	59	16	36	#N/A
TRIAE_CS42_4BS_TGACv1_330733_AA1108680	220	339	256	1420	1133	1240	1194	1233	939	CCT domain
TRIAE_CS42_4BS_TGACv1_331090_AA1109480	2574	1581	2831	16347	13627	17112	13637	13540	12458	Aldolase-type TIM barrel
TRIAE_CS42_4DL_TGACv1_342478_AA1114690	23	9	17	416	394	362	103	52	70	Alpha crystallin/Hsp20 domain
TRIAE_CS42_4DL_TGACv1_342480_AA1114720	19	53	11	1594	1294	1116	9890	6018	4283	#N/A
TRIAE_CS42_4DL_TGACv1_342613_AA1118080	48	73	61	250	274	283	2968	4486	3829	Glycoside hydrolase, catalytic domain
TRIAE_CS42_4DL_TGACv1_342708_AA1120160	736	604	632	5447	2475	5426	2365	1928	2850	#N/A
TRIAE_CS42_4DL_TGACv1_342747_AA1120860	21	32	18	349	236	208	402	128	187	DOMON_CIL1_like
TRIAE_CS42_4DL_TGACv1_343021_AA1127630	1	6	0	10	19	23	25	5	17	Coiled-coil domain containing protein 109, C-terminal
TRIAE_CS42_4DL_TGACv1_343033_AA1127950	33	21	15	102	162	104	624	923	642	consensus disorder prediction
TRIAE_CS42_4DL_TGACv1_343034_AA1128000	193	183	208	10243	7103	8559	1685	945	699	FAD/NAD(P)-binding domain
TRIAE_CS42_4DL_TGACv1_343040_AA1128160	583	685	654	7489	3939	4971	2435	2148	2471	#N/A
TRIAE_CS42_4DL_TGACv1_343055_AA1128650	156	151	87	6167	3963	4924	713	343	367	#N/A
TRIAE_CS42_4DL_TGACv1_343111_AA1129970	1117	1439	1194	13282	6144	6605	6184	7362	7042	consensus disorder prediction
TRIAE_CS42_4DL_TGACv1_343117_AA1130150	598	756	1211	11876	6011	8941	7711	2941	3879	RST domain of plant C-terminal
TRIAE_CS42_4DL_TGACv1_343127_AA1130270	41	24	10	1718	1502	1413	3633	4809	5494	PPM-type phosphatase domain
TRIAE_CS42_4DL_TGACv1_343139_AA1130400	13	6	1	131	69	89	42	18	60	Tify domain
TRIAE_CS42_4DL_TGACv1_343139_AA1130410	335	439	291	2406	1348	1791	1928	1263	1727	CO/COL/TOC1, conserved site
TRIAE_CS42_4DL_TGACv1_343139_AA1130420	576	244	300	2476	1893	2248	1873	1259	1630	consensus disorder prediction
TRIAE_CS42_4DL_TGACv1_343285_AA1132680	39	45	23	393	223	438	844	247	218	Cytochrome P450
TRIAE_CS42_4DL_TGACv1_343329_AA1133330	1	1	1	27	13	6	74	97	77	#N/A
TRIAE_CS42_4DL_TGACv1_343518_AA1135780	40	72	25	326	212	233	1267	1497	930	consensus disorder prediction
TRIAE_CS42_4DL_TGACv1_343575_AA1136840	0	6	2	82	72	69	59	72	42	consensus disorder prediction
TRIAE_CS42_4DL_TGACv1_343739_AA1138930	11	14	4	50	46	45	1235	1373	1091	Heat shock factor (HSF)-type, DNA-binding
TRIAE_CS42_4DL_TGACv1_343873_AA1140790	307	328	476	3350	2254	2602	1176	1473	1755	#N/A
TRIAE_CS42_4DL_TGACv1_343889_AA1141080	3	1	2	20	18	13	49	27	14	#N/A
TRIAE_CS42_4DL_TGACv1_343907_AA1141350	0	0	0	44	67	53	2	7	7	HSP20-like chaperone
TRIAE_CS42_4DL_TGACv1_343946_AA1141890	114	100	77	605	325	449	630	499	529	Alpha/Beta hydrolase fold
TRIAE_CS42_4DL_TGACv1_344177_AA1144620	60	32	28	334	430	372	308	286	243	AP2/ERF domain
TRIAE_CS42_4DL_TGACv1_344211_AA1144960	61	71	55	437	393	473	1648	663	477	UDP-glucuronosyl/UDP-glucosyltransferase
TRIAE_CS42_4DL_TGACv1_344268_AA1145680	13	2	4	443	216	305	214	50	51	consensus disorder prediction
TRIAE_CS42_4DL_TGACv1_344468_AA1147440	170	188	89	1345	845	1218	6438	6594	5014	Heat shock factor (HSF)-type, DNA-binding
TRIAE_CS42_4DL_TGACv1_344552_AA1147870	20	5	2	165	126	182	874	1415	987	consensus disorder prediction
TRIAE_CS42_4DL_TGACv1_344742_AA1149420	98	52	93	1085	770	955	335	278	400	Short-chain dehydrogenase/reductase SDR
TRIAE_CS42_4DL_TGACv1_344775_AA1149720	216	227	639	8841	4790	7169	5511	2064	2344	Glutamate decarboxylase
TRIAE_CS42_4DL_TGACv1_345064_AA1151400	7	2	6	52	95	109	4423	4417	4020	consensus disorder prediction
TRIAE_CS42_4DL_TGACv1_345634_AA1154020	92	39	129	340	502	400	374	331	368	Aluminum-activated malate transporter
TRIAE_CS42_4DS_TGACv1_361266_AA1164520	15	12	2	62	63	55	3673	5210	2914	consensus disorder prediction
TRIAE_CS42_4DS_TGACv1_361306_AA1165430	540	596	626	3526	1827	2412	2964	3332	3095	Glycoside hydrolase, catalytic domain
TRIAE_CS42_4DS_TGACv1_361353_AA1166160	22	36	27	722	646	633	479	319	317	consensus disorder prediction
TRIAE_CS42_4DS_TGACv1_361374_AA1166430	5	4	1	717	528	429	26	9	22	Nucleotide-diphospho-sugar transferases
TRIAE_CS42_4DS_TGACv1_361384_AA1166680	112	157	90	562	478	480	471	379	421	Serine aminopeptidase, S33
TRIAE_CS42_4DS_TGACv1_361414_AA1167530	249	101	216	776	1178	1381	1579	1134	1142	Cupin 1
TRIAE_CS42_4DS_TGACv1_361435_AA1168000	33	27	19	477	498	267	735	1292	1051	consensus disorder prediction
TRIAE_CS42_4DS_TGACv1_361436_AA1168010	108	171	82	756	674	661	1431	1711	1223	P-loop containing nucleoside triphosphate hydrolase
TRIAE_CS42_4DS_TGACv1_361556_AA1170060	8	7	3	44	49	45	3502	6739	6125	#N/A
TRIAE_CS42_4DS_TGACv1_361560_AA1170100	33	33	23	383	622	984	756	314	239	Germin
TRIAE_CS42_4DS_TGACv1_361603_AA1170580	413	441	392	5420	3766	4437	2095	2023	2005	Major facilitator superfamily domain
TRIAE_CS42_4DS_TGACv1_361639_AA1170980	9	2	8	34	34	29	31	20	20	Transcription factor GRAS
TRIAE_CS42_4DS_TGACv1_361717_AA1171960	53	54	104	787	847	1211	558	367	328	RmlC-like cupin domain
TRIAE_CS42_4DS_TGACv1_361717_AA1171970	230	155	263	1213	1504	1876	1002	884	862	Germin
TRIAE_CS42_4DS_TGACv1_361832_AA1173380	12	6	7	59	77	50	325	185	167	consensus disorder prediction
TRIAE_CS42_4DS_TGACv1_361927_AA1174410	111	211	85	2499	1263	1745	732	1109	900	Amino acid transporter, transmembrane domain
TRIAE_CS42_4DS_TGACv1_361964_AA1174830	2	1	0	373	390	310	56	25	28	HSP20-like chaperone
TRIAE_CS42_4DS_TGACv1_361978_AA1175200	5	10	17	42	59	33	48	64	45	PP2Cc
TRIAE_CS42_4DS_TGACv1_362037_AA1176000	15	17	11	99	121	85	859	1863	1865	Amino acid transporter, transmembrane domain
TRIAE_CS42_4DS_TGACv1_362143_AA1177130	2	2	2	473	183	199	257	347	289	WD40/YVTN repeat-like-containing domain
TRIAE_CS42_4DS_TGACv1_362143_AA1177150	26	8	6	101	59	62	451	674	782	WD40 repeat
TRIAE_CS42_4DS_TGACv1_362302_AA1178670	95	63	135	1925	1246	2131	1012	896	908	Chloramphenicol acetyltransferase-like domain
TRIAE_CS42_4DS_TGACv1_362363_AA1179150	16	18	31	103	131	100	1686	1558	1133	consensus disorder prediction
TRIAE_CS42_4DS_TGACv1_362517_AA1180320	0	0	1	10	15	13	72	81	89	consensus disorder prediction
TRIAE_CS42_4DS_TGACv1_362517_AA1180330	1	0	6	16	35	27	194	252	215	consensus disorder prediction
TRIAE_CS42_4DS_TGACv1_362583_AA1180770	631	611	927	4380	3388	3433	4526	4675	5387	Pyrimidine 5-nucleotidase
TRIAE_CS42_4DS_TGACv1_362583_AA1180780	2	2	1	66	100	62	14	6	9	Pre-mRNA processing factor 4 (PRP4)-like
TRIAE_CS42_4DS_TGACv1_362975_AA1182940	35	51	45	946	227	555	204	93	169	Vacuolar protein sorting-associated protein Ist1
TRIAE_CS42_4DS_TGACv1_363252_AA1183590	11	15	16	184	222	129	259	185	167	2Fe-2S ferredoxin-type iron-sulfur binding domain
TRIAE_CS42_4DS_TGACv1_363372_AA1183740	195	143	316	2859	2062	2779	1838	1844	1727	#N/A
TRIAE_CS42_4DS_TGACv1_363654_AA1184060	4	0	8	31	9	25	70	28	21	Protein of unknown function DUF1677, Oryza sativa
TRIAE_CS42_5AL_TGACv1_373968_AA1185690	179	153	133	2749	1740	2284	1416	655	523	Orn/DAP/Arg decarboxylase 2, N-terminal
TRIAE_CS42_5AL_TGACv1_373968_AA1185750	15	17	43	134	94	100	149	42	135	Chloramphenicol acetyltransferase-like domain
TRIAE_CS42_5AL_TGACv1_373971_AA1185940	1013	622	1107	17205	13045	14105	5285	5401	5360	NAC domain
TRIAE_CS42_5AL_TGACv1_374079_AA1189780	7	8	4	40	31	24	57	37	29	Ribulose-phosphate binding barrel
TRIAE_CS42_5AL_TGACv1_374164_AA1192140	0	8	1	13	18	20	51	42	29	Coiled-coil domain containing protein 109, C-terminal
TRIAE_CS42_5AL_TGACv1_374167_AA1192220	9	3	4	129	38	47	96	126	143	Myc-type, basic helix-loop-helix (bHLH) domain
TRIAE_CS42_5AL_TGACv1_374190_AA1192920	1	0	0	6	8	8	13	5	3	Glutathione S-transferase, C-terminal domain
TRIAE_CS42_5AL_TGACv1_374191_AA1193010	7	8	3	57	91	45	42	34	11	consensus disorder prediction
TRIAE_CS42_5AL_TGACv1_374345_AA1197340	9	4	10	402	253	374	86	25	82	#N/A
TRIAE_CS42_5AL_TGACv1_374417_AA1199760	105	33	33	1162	862	845	219	192	280	Cytochrome P450
TRIAE_CS42_5AL_TGACv1_374496_AA1201560	27	24	20	211	156	142	554	452	394	consensus disorder prediction
TRIAE_CS42_5AL_TGACv1_374550_AA1202980	6	6	0	591	368	410	57	45	45	P-loop containing nucleoside triphosphate hydrolase
TRIAE_CS42_5AL_TGACv1_374601_AA1204180	41	25	10	419	247	269	203	205	143	Carotenoid oxygenase
TRIAE_CS42_5AL_TGACv1_374656_AA1205740	6	5	4	1818	722	1307	100	22	38	Protein of unknown function DUF4228, plant
TRIAE_CS42_5AL_TGACv1_374690_AA1206640	172	38	59	1901	993	1289	550	360	400	EF-hand domain
TRIAE_CS42_5AL_TGACv1_374802_AA1209190	137	103	191	1485	1011	1643	1130	541	870	consensus disorder prediction
TRIAE_CS42_5AL_TGACv1_374835_AA1209850	315	299	239	3685	2800	2846	3240	2701	2108	Zinc finger, RING/FYVE/PHD-type
TRIAE_CS42_5AL_TGACv1_374946_AA1212530	141	165	119	2585	1271	1892	829	350	531	consensus disorder prediction
TRIAE_CS42_5AL_TGACv1_375074_AA1215460	25	14	19	438	305	445	816	484	645	Zinc finger, C2H2-like
TRIAE_CS42_5AL_TGACv1_375074_AA1215480	54	10	37	291	215	216	207	127	170	Zinc finger, C2H2
TRIAE_CS42_5AL_TGACv1_375074_AA1215510	28	9	6	207	132	219	151	83	152	Zinc finger C2H2-type/integrase DNA-binding domain
TRIAE_CS42_5AL_TGACv1_375076_AA1215560	0	4	12	85	60	81	22	48	41	EF-hand domain pair
TRIAE_CS42_5AL_TGACv1_375076_AA1215570	4	0	8	33	23	16	22	37	38	EF-hand domain pair
TRIAE_CS42_5AL_TGACv1_375294_AA1219340	8	11	30	1124	645	831	1169	216	266	Glutathione S-transferase, C-terminal-like
TRIAE_CS42_5AL_TGACv1_375294_AA1219350	2174	2132	2413	13074	9314	11612	9144	8449	7003	Glutathione S-transferase, C-terminal-like
TRIAE_CS42_5AL_TGACv1_375320_AA1219750	0	8	1	94	26	132	112	26	42	Ribosome-inactivating protein, subdomain 1
TRIAE_CS42_5AL_TGACv1_375357_AA1220390	3	2	1	16	10	11	57	20	29	#N/A
TRIAE_CS42_5AL_TGACv1_375382_AA1220800	129	48	102	636	688	761	507	342	312	#N/A
TRIAE_CS42_5AL_TGACv1_375435_AA1221520	31	55	28	196	133	192	12601	13314	9889	Late embryogenesis abundant protein, LEA-25/LEA-D113
TRIAE_CS42_5AL_TGACv1_375495_AA1222760	51	40	47	1112	1047	1166	316	167	222	Membrane transport protein
TRIAE_CS42_5AL_TGACv1_375497_AA1222770	115	79	109	2921	2311	2398	6200	5343	5130	consensus disorder prediction
TRIAE_CS42_5AL_TGACv1_375551_AA1223530	793	832	536	5225	2094	4108	2843	3292	3610	Clp ATPase, C-terminal
TRIAE_CS42_5AL_TGACv1_375621_AA1224680	15	18	16	843	411	741	160	178	185	consensus disorder prediction
TRIAE_CS42_5AL_TGACv1_375649_AA1225080	19	5	12	187	145	134	35	63	101	C2 domain
TRIAE_CS42_5AL_TGACv1_375680_AA1225470	733	727	842	4663	3080	3955	4694	6171	6176	Isoprenoid synthase domain
TRIAE_CS42_5AL_TGACv1_375750_AA1226620	9	29	23	131	121	135	311	123	104	consensus disorder prediction
TRIAE_CS42_5AL_TGACv1_375867_AA1228210	3	8	5	117	95	94	114	72	63	Inhibitor of apoptosis-promoting Bax1
TRIAE_CS42_5AL_TGACv1_375932_AA1229040	26	7	17	400	321	401	397	315	540	consensus disorder prediction
TRIAE_CS42_5AL_TGACv1_375932_AA1229080	13	3	1	433	307	378	188	199	312	Zinc finger, C2H2-like
TRIAE_CS42_5AL_TGACv1_375968_AA1229680	12	34	61	199	221	343	269	92	259	Chloramphenicol acetyltransferase-like domain
TRIAE_CS42_5AL_TGACv1_376140_AA1232720	7	2	5	20	29	27	33	26	31	consensus disorder prediction
TRIAE_CS42_5AL_TGACv1_376215_AA1233830	2	2	1	77	33	65	76	191	162	Chlorophyll A-B binding protein
TRIAE_CS42_5AL_TGACv1_376215_AA1233860	1	0	0	22	9	3	3	14	10	#N/A
TRIAE_CS42_5AL_TGACv1_376343_AA1235490	82	125	34	504	269	354	4252	4103	3713	#N/A
TRIAE_CS42_5AL_TGACv1_376349_AA1235590	58	109	86	834	462	442	1371	1675	1060	Fatty acid hydroxylase
TRIAE_CS42_5AL_TGACv1_376359_AA1235820	12	0	1	75	41	45	29	12	32	#N/A
TRIAE_CS42_5AL_TGACv1_376359_AA1235830	13	4	3	687	492	583	50	12	27	Zinc finger, C2H2
TRIAE_CS42_5AL_TGACv1_376359_AA1235840	5	0	0	137	137	154	24	7	10	Zinc finger, C2H2
TRIAE_CS42_5AL_TGACv1_376455_AA1237180	15	11	7	108	66	81	521	536	499	Basic-leucine zipper domain
TRIAE_CS42_5AL_TGACv1_376467_AA1237310	31	42	37	134	183	179	1754	2217	1791	Glycoside hydrolase superfamily
TRIAE_CS42_5AL_TGACv1_376487_AA1237570	12	12	3	39	35	40	472	806	669	consensus disorder prediction
TRIAE_CS42_5AL_TGACv1_376853_AA1241570	9	24	7	95	49	76	101	75	87	#N/A
TRIAE_CS42_5AL_TGACv1_376864_AA1241720	5	1	0	7	17	17	1132	1310	996	Heat shock factor (HSF)-type, DNA-binding
TRIAE_CS42_5AL_TGACv1_376882_AA1241990	121	96	98	2503	1569	2025	473	335	420	consensus disorder prediction
TRIAE_CS42_5AL_TGACv1_376920_AA1242340	1378	1317	1183	7136	3850	6380	6334	5098	5723	consensus disorder prediction
TRIAE_CS42_5AL_TGACv1_376955_AA1242720	1	1	0	14	6	7	28	95	29	consensus disorder prediction
TRIAE_CS42_5AL_TGACv1_376988_AA1243030	441	234	346	5093	4157	4356	1417	1115	1245	Mitochondrial brown fat uncoupling protein
TRIAE_CS42_5AL_TGACv1_377361_AA1246180	834	998	1632	11985	9186	10725	8159	3453	2895	#N/A
TRIAE_CS42_5AL_TGACv1_377381_AA1246320	4	7	0	26	15	16	24	12	7	#N/A
TRIAE_CS42_5AL_TGACv1_377447_AA1246910	1629	1650	3345	19520	6158	14392	32117	35387	36372	consensus disorder prediction
TRIAE_CS42_5AL_TGACv1_377595_AA1248190	1	2	4	1692	917	1206	59	41	55	consensus disorder prediction
TRIAE_CS42_5AL_TGACv1_377599_AA1248240	49	46	54	6533	4787	5372	452	274	259	UDP-glucuronosyl/UDP-glucosyltransferase
TRIAE_CS42_5AL_TGACv1_377599_AA1248250	14	5	4	611	496	529	2891	3324	2847	consensus disorder prediction
TRIAE_CS42_5AL_TGACv1_377777_AA1249420	6	2	0	93	107	93	322	360	244	#N/A
TRIAE_CS42_5AL_TGACv1_378226_AA1252070	330	253	512	3156	1419	2861	2592	1245	2283	Protein of unknown function DUF716 (TMEM45)
TRIAE_CS42_5AL_TGACv1_378411_AA1253150	16	25	84	890	701	711	229	251	513	EF-hand domain
TRIAE_CS42_5AL_TGACv1_379543_AA1256510	275	241	318	5793	5513	4444	757	1145	1076	Heat shock factor (HSF)-type, DNA-binding
TRIAE_CS42_5AS_TGACv1_392545_AA1260580	1	2	0	27	16	23	149	230	140	#N/A
TRIAE_CS42_5AS_TGACv1_392798_AA1264830	27	80	66	570	475	384	1992	1125	1673	AP2/ERF domain
TRIAE_CS42_5AS_TGACv1_393108_AA1268550	262	228	389	13921	10111	14447	3643	1227	1678	P-loop containing nucleoside triphosphate hydrolase
TRIAE_CS42_5AS_TGACv1_393299_AA1270880	4	8	23	290	278	245	1086	1101	1192	#N/A
TRIAE_CS42_5AS_TGACv1_393552_AA1273770	26	35	21	149	127	81	175	90	63	Serine/threonine-protein kinase, active site
TRIAE_CS42_5AS_TGACv1_394529_AA1280810	5	7	6	56	20	31	17	27	31	consensus disorder prediction
TRIAE_CS42_5BL_TGACv1_404109_AA1284230	1	1	1	8	10	9	19	11	4	Homeodomain-like
TRIAE_CS42_5BL_TGACv1_404125_AA1285180	31	20	5	287	195	177	218	211	128	Carotenoid oxygenase
TRIAE_CS42_5BL_TGACv1_404131_AA1285740	231	259	196	2400	1616	1765	2124	1822	1566	Zinc finger, RING/FYVE/PHD-type
TRIAE_CS42_5BL_TGACv1_404144_AA1286510	22	34	32	161	83	178	143	172	216	Zinc finger, CCHC-type
TRIAE_CS42_5BL_TGACv1_404156_AA1287190	4	4	1	72	86	63	74	98	103	#N/A
TRIAE_CS42_5BL_TGACv1_404158_AA1287320	141	144	119	919	841	664	711	986	710	#N/A
TRIAE_CS42_5BL_TGACv1_404184_AA1288920	86	82	96	4787	1809	3729	1213	403	677	GT1_Gtf_like
TRIAE_CS42_5BL_TGACv1_404273_AA1293400	0	0	1	20	8	9	39	38	22	#N/A
TRIAE_CS42_5BL_TGACv1_404300_AA1294570	0	0	0	16	5	10	12	39	22	#N/A
TRIAE_CS42_5BL_TGACv1_404312_AA1295080	29	28	50	303	224	335	246	63	139	Chloramphenicol acetyltransferase-like domain
TRIAE_CS42_5BL_TGACv1_404315_AA1295210	7	4	6	228	179	245	168	52	61	#N/A
TRIAE_CS42_5BL_TGACv1_404396_AA1298380	7	5	22	904	518	704	411	1187	974	Alpha crystallin/Hsp20 domain
TRIAE_CS42_5BL_TGACv1_404414_AA1298930	8	8	5	36	54	24	2482	2211	1617	consensus disorder prediction
TRIAE_CS42_5BL_TGACv1_404565_AA1304380	187	89	176	1268	900	1263	450	512	770	#N/A
TRIAE_CS42_5BL_TGACv1_404570_AA1304490	5	13	3	53	56	50	60	51	40	Inhibitor of apoptosis-promoting Bax1
TRIAE_CS42_5BL_TGACv1_404605_AA1305870	434	448	668	6537	2463	4473	22885	24772	23080	consensus disorder prediction
TRIAE_CS42_5BL_TGACv1_404666_AA1307790	62	67	52	671	824	697	21881	34985	28012	Dehydrin, conserved site
TRIAE_CS42_5BL_TGACv1_404669_AA1307890	114	112	133	3495	1799	2614	1987	582	602	Mitochondrial substrate/solute carrier
TRIAE_CS42_5BL_TGACv1_404769_AA1310440	433	344	321	5776	3800	4760	1431	1168	1638	Zinc finger, RING/FYVE/PHD-type
TRIAE_CS42_5BL_TGACv1_404813_AA1311470	162	130	141	1412	876	1097	719	664	478	#N/A
TRIAE_CS42_5BL_TGACv1_404911_AA1314640	274	352	227	2588	1131	2088	1349	1291	1560	Clp, N-terminal
TRIAE_CS42_5BL_TGACv1_405048_AA1318790	12	16	8	100	41	51	102	57	30	Sugar/inositol transporter
TRIAE_CS42_5BL_TGACv1_405085_AA1319580	818	909	753	4577	3052	4306	3686	3927	4116	Multi antimicrobial extrusion protein
TRIAE_CS42_5BL_TGACv1_405098_AA1319870	134	88	106	5001	3148	4220	673	368	418	consensus disorder prediction
TRIAE_CS42_5BL_TGACv1_405098_AA1319900	17	10	18	1300	685	1138	187	79	110	consensus disorder prediction
TRIAE_CS42_5BL_TGACv1_405122_AA1320650	6	2	10	125	70	90	34	17	36	#N/A
TRIAE_CS42_5BL_TGACv1_405192_AA1321810	20	21	31	644	751	533	368	247	244	Membrane transport protein
TRIAE_CS42_5BL_TGACv1_405340_AA1325400	15	7	22	1024	683	714	114	37	43	Zinc finger, C2H2-like
TRIAE_CS42_5BL_TGACv1_405340_AA1325450	19	7	21	641	426	597	126	103	123	consensus disorder prediction
TRIAE_CS42_5BL_TGACv1_405340_AA1325460	25	19	39	689	596	541	126	130	178	Zinc finger, C2H2
TRIAE_CS42_5BL_TGACv1_405536_AA1329720	39	53	39	382	255	278	264	144	149	#N/A
TRIAE_CS42_5BL_TGACv1_405558_AA1330270	4	1	4	74	51	60	20	15	10	#N/A
TRIAE_CS42_5BL_TGACv1_405635_AA1331840	19	19	16	117	123	132	619	809	796	consensus disorder prediction
TRIAE_CS42_5BL_TGACv1_405759_AA1334850	23	24	19	885	514	918	2816	2210	2451	UDP-glucuronosyl/UDP-glucosyltransferase
TRIAE_CS42_5BL_TGACv1_405868_AA1336770	136	150	199	1168	646	1124	906	519	759	#N/A
TRIAE_CS42_5BL_TGACv1_405971_AA1338410	60	45	95	3647	2882	2869	2386	931	837	Thioredoxin-like fold
TRIAE_CS42_5BL_TGACv1_406085_AA1340490	2	3	6	26	11	21	17	22	18	consensus disorder prediction
TRIAE_CS42_5BL_TGACv1_406391_AA1345000	14	18	11	296	252	372	165	70	54	UDP-glucuronosyl/UDP-glucosyltransferase
TRIAE_CS42_5BL_TGACv1_406407_AA1345180	0	1	3	22	8	9	28	11	11	Prenylated rab acceptor PRA1
TRIAE_CS42_5BL_TGACv1_406522_AA1346530	24	4	11	1392	1236	1291	468	243	370	Zinc finger, C2H2
TRIAE_CS42_5BL_TGACv1_406541_AA1346800	22	23	45	1070	936	1082	625	955	1289	#N/A
TRIAE_CS42_5BL_TGACv1_406562_AA1347100	606	480	498	3937	1556	3616	4709	2717	3866	#N/A
TRIAE_CS42_5BL_TGACv1_406580_AA1347370	0	0	0	3	9	5	350	292	171	Proline rich extensin signature
TRIAE_CS42_5BL_TGACv1_406645_AA1348080	219	85	125	1723	915	1345	690	401	627	#N/A
TRIAE_CS42_5BL_TGACv1_406750_AA1349490	29	36	21	179	316	272	20706	29164	26311	ADF-H/Gelsolin-like domain
TRIAE_CS42_5BL_TGACv1_407166_AA1354040	789	439	659	13629	10451	11730	6496	7513	7268	NAC domain
TRIAE_CS42_5BL_TGACv1_407272_AA1355070	19	21	23	618	309	541	149	75	113	Protein of unknown function DUF761, plant
TRIAE_CS42_5BL_TGACv1_407475_AA1357290	4	2	4	12	22	28	87	25	38	NADP-dependent oxidoreductase domain
TRIAE_CS42_5BL_TGACv1_407520_AA1357660	38	53	40	641	198	539	569	415	574	Cytokinin riboside 5'-monophosphate phosphoribohydrolase LOG
TRIAE_CS42_5BL_TGACv1_407608_AA1358340	3	2	6	24	25	23	25	40	17	DnaJ domain
TRIAE_CS42_5BL_TGACv1_407800_AA1359720	180	327	306	7657	4706	7055	6174	1483	1552	Cytochrome P450, E-class, group I
TRIAE_CS42_5BL_TGACv1_407845_AA1359940	74	22	50	1715	1429	1712	820	765	1027	#N/A
TRIAE_CS42_5BL_TGACv1_407857_AA1360010	119	54	121	7491	3997	4876	889	409	509	consensus disorder prediction
TRIAE_CS42_5BL_TGACv1_407961_AA1360690	20	21	8	1327	914	985	3036	3109	2758	PPM-type phosphatase domain
TRIAE_CS42_5BL_TGACv1_408009_AA1361040	3	3	5	15	27	26	30	16	26	#N/A
TRIAE_CS42_5BL_TGACv1_408009_AA1361050	12	20	33	348	223	278	335	139	180	AP2/ERF domain
TRIAE_CS42_5BL_TGACv1_408035_AA1361270	40	43	46	2582	1176	1844	251	112	218	CO/COL/TOC1, conserved site
TRIAE_CS42_5BL_TGACv1_408036_AA1361280	82	22	55	2219	1713	1993	332	169	282	Zinc finger, C2H2
TRIAE_CS42_5BL_TGACv1_408036_AA1361290	6	5	10	200	93	178	140	84	83	Zinc finger, C2H2
TRIAE_CS42_5BL_TGACv1_408289_AA1362630	5	1	2	24	18	28	377	354	320	consensus disorder prediction
TRIAE_CS42_5BL_TGACv1_408450_AA1363440	0	1	0	954	562	649	20	7	8	F-box domain
TRIAE_CS42_5BL_TGACv1_409111_AA1365440	42	38	31	504	343	349	334	257	237	ENTH/VHS
TRIAE_CS42_5BL_TGACv1_409737_AA1366440	3	2	0	394	414	353	72	78	142	Zinc finger, C2H2
TRIAE_CS42_5BL_TGACv1_410124_AA1366800	37	39	37	358	556	554	959	536	335	Cytochrome P450, conserved site
TRIAE_CS42_5BL_TGACv1_412328_AA1367790	0	2	0	48	47	30	59	81	65	#N/A
TRIAE_CS42_5BL_TGACv1_413043_AA1367940	170	147	121	889	519	553	434	722	554	#N/A
TRIAE_CS42_5BL_TGACv1_413157_AA1367970	6	5	9	240	162	166	28	31	37	consensus disorder prediction
TRIAE_CS42_5BS_TGACv1_423293_AA1373550	2	1	2	9	12	14	134	159	124	Domain of unknown function DUF588
TRIAE_CS42_5BS_TGACv1_423363_AA1375180	8	2	7	31	29	34	50	39	43	Zinc finger, RING-type
TRIAE_CS42_5BS_TGACv1_423429_AA1376700	0	2	1	5	12	16	947	771	609	consensus disorder prediction
TRIAE_CS42_5BS_TGACv1_423479_AA1377730	99	105	75	526	446	365	1156	736	869	Nucleotide-diphospho-sugar transferases
TRIAE_CS42_5BS_TGACv1_423773_AA1382940	247	151	101	1044	775	787	1830	1938	1458	TB2/DP1/HVA22-related protein
TRIAE_CS42_5BS_TGACv1_423804_AA1383550	16	4	2	149	129	132	1019	1203	870	#N/A
TRIAE_CS42_5BS_TGACv1_424253_AA1388060	0	0	0	23	8	10	113	39	29	consensus disorder prediction
TRIAE_CS42_5BS_TGACv1_424302_AA1388540	20	6	13	90	116	87	99	124	99	consensus disorder prediction
TRIAE_CS42_5DL_TGACv1_432926_AA1394650	32	15	39	355	245	384	320	142	147	consensus disorder prediction
TRIAE_CS42_5DL_TGACv1_432941_AA1395460	50	57	28	643	708	671	19650	27595	24577	Dehydrin, conserved site
TRIAE_CS42_5DL_TGACv1_433011_AA1398010	2	1	0	13	16	14	19	17	17	#N/A
TRIAE_CS42_5DL_TGACv1_433011_AA1398050	76	45	34	310	176	251	438	430	472	#N/A
TRIAE_CS42_5DL_TGACv1_433016_AA1398280	21	11	6	683	506	594	537	129	240	Zinc finger, C2H2
TRIAE_CS42_5DL_TGACv1_433088_AA1401500	175	215	258	5204	3125	4295	3511	1228	1439	#N/A
TRIAE_CS42_5DL_TGACv1_433148_AA1403670	155	104	122	1534	1044	1407	508	586	847	consensus disorder prediction
TRIAE_CS42_5DL_TGACv1_433178_AA1404830	3	0	0	9	12	12	15	13	11	consensus disorder prediction
TRIAE_CS42_5DL_TGACv1_433219_AA1406030	29	27	12	1406	988	1088	2933	2735	2204	PPM-type phosphatase domain
TRIAE_CS42_5DL_TGACv1_433239_AA1406630	46	40	47	313	186	204	1620	2114	1902	Domain of unknown function DUF588
TRIAE_CS42_5DL_TGACv1_433246_AA1406920	93	74	57	3166	2113	2669	585	447	659	consensus disorder prediction
TRIAE_CS42_5DL_TGACv1_433270_AA1407710	13	26	19	211	249	184	164	150	118	Inhibitor of apoptosis-promoting Bax1
TRIAE_CS42_5DL_TGACv1_433317_AA1409350	141	77	200	2446	2062	2278	1120	407	587	Membrane transport protein
TRIAE_CS42_5DL_TGACv1_433412_AA1412460	100	69	66	694	463	544	300	279	259	ENTH/VHS
TRIAE_CS42_5DL_TGACv1_433478_AA1414210	1276	1335	1224	14398	6838	11316	4334	4866	4851	Multi antimicrobial extrusion protein
TRIAE_CS42_5DL_TGACv1_433481_AA1414370	189	102	155	3734	2900	3323	1037	675	718	UDP-glucuronosyl/UDP-glucosyltransferase
TRIAE_CS42_5DL_TGACv1_433506_AA1415020	6	13	2	101	86	104	26	26	24	CALMODULIN-BINDING PROTEIN60
TRIAE_CS42_5DL_TGACv1_433640_AA1418200	8	17	16	700	439	508	546	380	279	Glutathione S-transferase, C-terminal domain
TRIAE_CS42_5DL_TGACv1_433673_AA1419180	245	307	234	2398	1455	1724	1650	1510	1173	Zinc finger, RING-type
TRIAE_CS42_5DL_TGACv1_433703_AA1419820	5	5	4	1348	719	963	25	21	20	Uncharacterised protein family UPF0114
TRIAE_CS42_5DL_TGACv1_433792_AA1422170	68	51	52	460	270	276	340	234	308	Serine/threonine-protein kinase, active site
TRIAE_CS42_5DL_TGACv1_433804_AA1422600	5	2	5	28	26	20	72	56	54	#N/A
TRIAE_CS42_5DL_TGACv1_433809_AA1422730	343	243	386	2575	2382	2665	1902	4096	3995	Ferritin-like superfamily
TRIAE_CS42_5DL_TGACv1_433817_AA1422930	12	5	11	102	31	67	84	101	64	Chlorophyll A-B binding protein
TRIAE_CS42_5DL_TGACv1_433853_AA1423720	38	50	30	910	456	707	320	206	218	UDP-glucuronosyl/UDP-glucosyltransferase
TRIAE_CS42_5DL_TGACv1_433922_AA1425340	43	37	46	211	142	218	291	102	160	Protein of unknown function DUF761, plant
TRIAE_CS42_5DL_TGACv1_433934_AA1425570	175	162	118	1430	1370	953	1200	1308	1161	Serine/threonine-protein kinase, active site
TRIAE_CS42_5DL_TGACv1_433973_AA1426480	5	10	1	95	81	59	282	230	159	#N/A
TRIAE_CS42_5DL_TGACv1_434043_AA1427790	3	3	1	20	15	14	67	125	123	consensus disorder prediction
TRIAE_CS42_5DL_TGACv1_434077_AA1428460	14	21	20	428	148	362	421	322	466	#N/A
TRIAE_CS42_5DL_TGACv1_434088_AA1428790	2654	3456	2764	23045	16421	18697	15365	15084	12732	Glutathione S-transferase, N-terminal
TRIAE_CS42_5DL_TGACv1_434230_AA1432120	15	21	29	229	288	233	1345	559	777	AP2/ERF domain
TRIAE_CS42_5DL_TGACv1_434236_AA1432300	32	36	34	332	251	259	492	376	265	Glutathione S-transferase, N-terminal
TRIAE_CS42_5DL_TGACv1_434688_AA1440070	24	24	50	174	173	189	291	494	400	Heavy metal-associated domain, HMA
TRIAE_CS42_5DL_TGACv1_434778_AA1441490	3	1	2	68	73	76	79	16	44	#N/A
TRIAE_CS42_5DL_TGACv1_434828_AA1442260	251	363	331	13458	10198	13226	11318	4730	3636	Cytochrome P450, conserved site
TRIAE_CS42_5DL_TGACv1_434857_AA1442630	3	0	0	9	11	9	8	16	7	consensus disorder prediction
TRIAE_CS42_5DL_TGACv1_434862_AA1442720	354	195	459	2315	1650	1388	1705	2032	1767	Tubby C-terminal-like domain
TRIAE_CS42_5DL_TGACv1_434930_AA1443690	6	1	4	170	153	191	125	163	227	Zinc finger, C2H2-like
TRIAE_CS42_5DL_TGACv1_434930_AA1443700	30	10	19	733	556	623	237	117	226	Zinc finger, C2H2
TRIAE_CS42_5DL_TGACv1_434930_AA1443710	38	32	56	1070	741	954	1209	987	1385	Zinc finger, C2H2-like
TRIAE_CS42_5DL_TGACv1_434930_AA1443720	9	0	5	176	173	144	19	15	19	#N/A
TRIAE_CS42_5DL_TGACv1_435380_AA1449810	6	2	0	83	83	51	13	8	19	Zinc finger, C2H2
TRIAE_CS42_5DL_TGACv1_435380_AA1449820	9	0	1	235	163	185	31	17	46	Zinc finger, C2H2
TRIAE_CS42_5DL_TGACv1_435380_AA1449850	9	5	1	90	77	94	76	120	248	Zinc finger, C2H2
TRIAE_CS42_5DL_TGACv1_435426_AA1450500	431	295	509	4754	1124	2690	4583	1368	2199	RmlC-like jelly roll fold
TRIAE_CS42_5DL_TGACv1_435790_AA1454970	123	130	158	1628	842	1539	828	645	822	Alpha/Beta hydrolase fold
TRIAE_CS42_5DL_TGACv1_435806_AA1455090	421	538	746	18450	13715	16520	7892	3193	3234	Cytochrome P450, conserved site
TRIAE_CS42_5DL_TGACv1_435856_AA1455630	563	538	701	3437	2051	2848	2867	2512	3303	RelA/SpoT
TRIAE_CS42_5DL_TGACv1_435998_AA1457130	652	570	1087	12048	5582	9394	25670	27576	27152	GRAM domain
TRIAE_CS42_5DL_TGACv1_436296_AA1459790	82	85	256	1985	832	1425	1584	2266	2134	EF-hand domain pair
TRIAE_CS42_5DL_TGACv1_436541_AA1461810	2788	2681	2120	13349	8441	12279	12689	11792	14017	NAD(P)-binding domain
TRIAE_CS42_5DL_TGACv1_436676_AA1462650	553	738	408	6084	3003	4804	3684	3794	4175	P-loop containing nucleoside triphosphate hydrolase
TRIAE_CS42_5DL_TGACv1_436752_AA1463080	1	3	6	611	534	499	215	47	67	Zinc finger, C2H2
TRIAE_CS42_5DL_TGACv1_436794_AA1463240	11	9	17	77	46	55	308	416	500	Myc-type, basic helix-loop-helix (bHLH) domain
TRIAE_CS42_5DL_TGACv1_436796_AA1463260	12	3	6	644	489	674	106	58	104	consensus disorder prediction
TRIAE_CS42_5DL_TGACv1_436878_AA1463780	35	41	60	550	369	422	200	200	233	Epoxide hydrolase-like
TRIAE_CS42_5DL_TGACv1_437065_AA1464880	10	14	8	87	72	66	728	859	680	#N/A
TRIAE_CS42_5DL_TGACv1_437074_AA1464980	24	38	18	82	154	129	9640	11066	8664	AWPM-19-like
TRIAE_CS42_5DL_TGACv1_438120_AA1467920	669	375	721	14571	10761	12774	5711	6084	5977	NAC domain
TRIAE_CS42_5DS_TGACv1_456680_AA1476140	4	3	3	16	22	21	32	26	28	VQ
TRIAE_CS42_5DS_TGACv1_456795_AA1478140	4	9	7	68	56	37	221	273	163	consensus disorder prediction
TRIAE_CS42_5DS_TGACv1_456850_AA1479220	2	3	0	37	21	13	10	23	31	#N/A
TRIAE_CS42_5DS_TGACv1_457217_AA1483860	14	3	5	486	315	331	2779	2761	2028	Carotenoid oxygenase
TRIAE_CS42_5DS_TGACv1_457254_AA1484350	81	17	55	245	309	263	213	272	280	consensus disorder prediction
TRIAE_CS42_5DS_TGACv1_457440_AA1486590	367	298	307	1712	1162	1473	1552	1016	1235	Ubiquitin specific protease, conserved site
TRIAE_CS42_5DS_TGACv1_458256_AA1492960	55	26	83	368	359	398	181	414	533	Major facilitator superfamily domain
TRIAE_CS42_5DS_TGACv1_458591_AA1494130	0	0	0	132	118	116	32	8	25	Zinc finger, C2H2
TRIAE_CS42_5DS_TGACv1_458827_AA1494600	13	4	10	66	45	75	3322	4497	3685	#N/A
TRIAE_CS42_6AL_TGACv1_470976_AA1499970	4	12	65	137	111	135	205	349	444	NAD(P)-binding domain
TRIAE_CS42_6AL_TGACv1_471055_AA1501800	6	3	4	86	69	78	38	14	38	Armadillo-type fold
TRIAE_CS42_6AL_TGACv1_471532_AA1510490	40	28	34	1135	612	878	128	138	213	SANT/Myb domain
TRIAE_CS42_6AL_TGACv1_471580_AA1511200	70	86	75	468	839	647	1195	271	379	UDP-glucuronosyl/UDP-glucosyltransferase
TRIAE_CS42_6AL_TGACv1_471757_AA1513880	0	0	0	5	8	5	11	23	16	Heavy metal-associated domain, HMA
TRIAE_CS42_6AL_TGACv1_471860_AA1515380	211	439	228	4819	2615	3545	11211	9691	8236	Isopenicillin N synthase-like
TRIAE_CS42_6AL_TGACv1_471895_AA1515700	24	6	11	116	82	46	80	22	62	AP2/ERF domain
TRIAE_CS42_6AL_TGACv1_471999_AA1516750	24	45	11	742	822	726	332	157	173	HSP20-like chaperone
TRIAE_CS42_6AL_TGACv1_472020_AA1516870	18	30	9	110	118	86	3580	5832	4711	Late embryogenesis abundant protein, LEA-25/LEA-D113
TRIAE_CS42_6AL_TGACv1_472039_AA1517140	18	5	11	78	130	70	67	31	63	consensus disorder prediction
TRIAE_CS42_6AL_TGACv1_472130_AA1518100	15	10	8	189	232	177	142	62	159	Cytochrome P450
TRIAE_CS42_6AL_TGACv1_472199_AA1519050	532	621	689	4189	2312	3025	3794	5263	4511	#N/A
TRIAE_CS42_6AL_TGACv1_472246_AA1519780	1	0	5	837	692	818	59	93	151	NAD-dependent epimerase/dehydratase
TRIAE_CS42_6AL_TGACv1_472246_AA1519790	5	12	64	778	451	1105	354	399	1086	NAD(P)-binding domain
TRIAE_CS42_6AL_TGACv1_472386_AA1521600	465	419	617	8930	3937	7444	2692	1896	2173	PPM-type phosphatase, divalent cation binding
TRIAE_CS42_6AL_TGACv1_472504_AA1522850	30	11	59	156	202	173	127	150	152	consensus disorder prediction
TRIAE_CS42_6AL_TGACv1_472560_AA1523640	369	284	261	1511	1048	1461	1562	1476	1580	S-adenosylmethionine decarboxylase
TRIAE_CS42_6AL_TGACv1_472803_AA1526190	5	3	20	57	56	48	77	33	68	EF-hand domain
TRIAE_CS42_6AL_TGACv1_472950_AA1527420	5	2	3	255	145	172	25	13	12	Zinc finger, RING/FYVE/PHD-type
TRIAE_CS42_6AL_TGACv1_472980_AA1527800	2	3	2	43	47	23	405	361	258	GAF domain
TRIAE_CS42_6AL_TGACv1_473165_AA1529140	17	16	13	186	327	226	92	50	43	UDP-glucuronosyl/UDP-glucosyltransferase
TRIAE_CS42_6AL_TGACv1_473188_AA1529340	141	111	200	817	650	736	2156	1351	1611	Transferase
TRIAE_CS42_6AL_TGACv1_473438_AA1531100	599	571	501	2790	2324	2741	4014	1624	1443	GST_C_Phi
TRIAE_CS42_6AL_TGACv1_474408_AA1535120	52	81	105	671	322	560	709	554	870	#N/A
TRIAE_CS42_6AL_TGACv1_474771_AA1535870	0	0	1	19	16	11	14	19	6	Pleckstrin homology domain
TRIAE_CS42_6AS_TGACv1_485242_AA1541460	31	34	41	341	303	261	217	126	85	consensus disorder prediction
TRIAE_CS42_6AS_TGACv1_485318_AA1543100	167	173	154	1750	869	1500	1169	611	654	GT1_Gtf_like
TRIAE_CS42_6AS_TGACv1_485604_AA1548360	60	48	38	436	257	343	1171	354	337	Cytochrome P450, conserved site
TRIAE_CS42_6AS_TGACv1_485688_AA1550110	31	51	30	290	191	213	384	245	164	Glycoside hydrolase family 18, catalytic domain
TRIAE_CS42_6AS_TGACv1_485852_AA1553340	489	352	371	6648	4256	4375	2262	1628	2048	VQ
TRIAE_CS42_6AS_TGACv1_486348_AA1560130	581	491	720	3722	2239	3052	2398	2061	2203	Glutathione S-transferase (GST)
TRIAE_CS42_6AS_TGACv1_486353_AA1560340	14	8	24	355	318	289	116	40	90	#N/A
TRIAE_CS42_6AS_TGACv1_486356_AA1560380	14	36	22	191	195	196	182	188	170	consensus disorder prediction
TRIAE_CS42_6AS_TGACv1_486559_AA1562640	72	69	88	499	248	562	589	205	248	UDP-glucuronosyl/UDP-glucosyltransferase
TRIAE_CS42_6AS_TGACv1_486616_AA1563260	5	6	4	29	17	29	223	214	183	#N/A
TRIAE_CS42_6AS_TGACv1_487226_AA1569160	145	79	177	3798	2227	3059	1285	361	591	consensus disorder prediction
TRIAE_CS42_6AS_TGACv1_487229_AA1569260	192	170	154	1187	585	712	1766	1442	1148	consensus disorder prediction
TRIAE_CS42_6AS_TGACv1_487883_AA1573410	0	0	0	21	22	22	17	3	4	#N/A
TRIAE_CS42_6AS_TGACv1_488046_AA1574160	2132	2048	2471	13092	7616	13861	17627	10782	14019	Glutathione S-transferase, C-terminal-like
TRIAE_CS42_6AS_TGACv1_488407_AA1575410	4	0	3	11	14	15	18	22	29	#N/A
TRIAE_CS42_6BL_TGACv1_499345_AA1578760	141	120	175	770	570	913	784	534	667	Armadillo-like helical
TRIAE_CS42_6BL_TGACv1_499717_AA1589910	93	71	79	1168	497	722	678	580	657	consensus disorder prediction
TRIAE_CS42_6BL_TGACv1_499746_AA1590940	0	0	4	19	32	28	715	69	95	#N/A
TRIAE_CS42_6BL_TGACv1_499801_AA1592120	116	63	236	1084	1051	942	1744	2518	2068	Phosphate-induced protein 1
TRIAE_CS42_6BL_TGACv1_499809_AA1592240	38	18	4	195	48	79	169	114	156	Zinc finger, RING-type
TRIAE_CS42_6BL_TGACv1_499891_AA1594130	136	125	128	838	833	613	411	855	749	#N/A
TRIAE_CS42_6BL_TGACv1_499915_AA1594660	60	43	75	427	207	251	287	169	195	F-box domain
TRIAE_CS42_6BL_TGACv1_500027_AA1597560	576	413	510	2773	2027	2241	4072	3881	4573	Cytochrome P450
TRIAE_CS42_6BL_TGACv1_500036_AA1597670	132	147	227	8976	7301	7531	917	1368	1397	#N/A
TRIAE_CS42_6BL_TGACv1_500231_AA1601800	57	62	48	435	326	311	579	173	230	#N/A
TRIAE_CS42_6BL_TGACv1_500444_AA1604700	4	3	28	50	68	58	807	1295	1171	Dehydrin
TRIAE_CS42_6BL_TGACv1_500473_AA1605280	365	405	480	2514	1824	2010	3819	6548	5351	consensus disorder prediction
TRIAE_CS42_6BL_TGACv1_500618_AA1607370	16	18	209	2719	1845	3175	1718	2512	3662	FR_SDR_e
TRIAE_CS42_6BL_TGACv1_500747_AA1609190	119	144	246	2455	2498	2657	1248	1191	1407	Protein of unknown function DUF4228, plant
TRIAE_CS42_6BL_TGACv1_501073_AA1613180	39	24	31	238	144	207	214	230	277	SANT/Myb domain
TRIAE_CS42_6BL_TGACv1_501075_AA1613210	22	31	8	103	116	97	1796	1712	1654	homeodomain
TRIAE_CS42_6BL_TGACv1_501116_AA1613740	19	17	15	89	101	75	219	121	309	Major facilitator superfamily domain
TRIAE_CS42_6BL_TGACv1_501132_AA1613940	0	0	0	7	17	5	5	4	6	#N/A
TRIAE_CS42_6BL_TGACv1_501265_AA1615410	402	325	570	10074	6968	8878	2415	1757	1611	Cytochrome P450, E-class, group I
TRIAE_CS42_6BL_TGACv1_501383_AA1616820	223	303	275	1522	865	1130	1542	2129	1543	consensus disorder prediction
TRIAE_CS42_6BL_TGACv1_501447_AA1617650	7	8	8	114	97	145	34	20	53	#N/A
TRIAE_CS42_6BL_TGACv1_502041_AA1622620	600	533	805	15457	7922	12727	3930	2852	3495	PPM-type phosphatase, divalent cation binding
TRIAE_CS42_6BL_TGACv1_502092_AA1623040	11	5	3	737	476	500	41	26	27	#N/A
TRIAE_CS42_6BL_TGACv1_502176_AA1623570	35	40	19	613	469	550	906	1019	943	#N/A
TRIAE_CS42_6BL_TGACv1_502415_AA1624650	10	16	17	60	105	60	163	43	61	consensus disorder prediction
TRIAE_CS42_6BL_TGACv1_502904_AA1626630	3	8	7	56	46	41	75	39	46	#N/A
TRIAE_CS42_6BL_TGACv1_503059_AA1627150	80	58	872	3295	2289	3783	2852	3728	4730	NAD(P)-binding domain
TRIAE_CS42_6BS_TGACv1_513127_AA1631020	3	5	5	41	47	30	24	24	19	P-loop containing nucleoside triphosphate hydrolase
TRIAE_CS42_6BS_TGACv1_513174_AA1632920	679	449	466	3143	1555	2848	3012	1938	2635	ABC transporter-like
TRIAE_CS42_6BS_TGACv1_513468_AA1642560	141	73	117	4029	2357	3266	1143	362	509	#N/A
TRIAE_CS42_6BS_TGACv1_513490_AA1643020	23	16	9	170	136	123	1402	1949	996	#N/A
TRIAE_CS42_6BS_TGACv1_513586_AA1645330	7	18	6	280	204	285	104	54	70	Glycoside hydrolase superfamily
TRIAE_CS42_6BS_TGACv1_513669_AA1646900	121	85	144	8401	3117	5960	877	456	614	vWFA
TRIAE_CS42_6BS_TGACv1_513845_AA1650550	62	48	68	567	422	378	322	409	333	#N/A
TRIAE_CS42_6BS_TGACv1_514290_AA1658030	58	42	48	572	315	472	563	155	240	Uncharacterised conserved protein UCP015417, vWA
TRIAE_CS42_6BS_TGACv1_514318_AA1658270	72	44	74	820	553	860	542	292	277	GT1_Gtf_like
TRIAE_CS42_6BS_TGACv1_514356_AA1658720	0	1	2	5	11	9	88	84	76	Heavy metal-associated domain, HMA
TRIAE_CS42_6BS_TGACv1_514681_AA1663170	7	12	2	160	112	162	126	65	72	Glycoside hydrolase family 18, catalytic domain
TRIAE_CS42_6BS_TGACv1_514843_AA1665000	0	0	0	5	6	4	6	6	3	#N/A
TRIAE_CS42_6BS_TGACv1_514983_AA1666410	2	0	0	22	7	21	43	59	19	#N/A
TRIAE_CS42_6BS_TGACv1_515059_AA1666900	86	66	129	4757	2868	4099	1538	339	490	consensus disorder prediction
TRIAE_CS42_6BS_TGACv1_515239_AA1668520	81	41	66	1136	686	1083	298	150	263	Protein of unknown function DUF4228, plant
TRIAE_CS42_6BS_TGACv1_515466_AA1670270	90	82	67	452	293	327	443	386	439	Alpha/Beta hydrolase fold
TRIAE_CS42_6BS_TGACv1_515661_AA1671630	0	1	0	74	22	49	9	7	9	Hemocyanin/hexamerin
TRIAE_CS42_6BS_TGACv1_515900_AA1672790	4	4	13	53	44	33	196	106	78	#N/A
TRIAE_CS42_6DL_TGACv1_526318_AA1679410	106	68	118	3048	2559	3166	369	426	391	Nitrite/sulphite reductase iron-sulphur/sirohaem-binding site
TRIAE_CS42_6DL_TGACv1_526383_AA1681360	30	27	40	1228	646	1260	237	115	189	Serine/threonine-protein kinase, active site
TRIAE_CS42_6DL_TGACv1_526392_AA1681950	3	8	1	96	46	51	27	51	109	Heavy metal-associated domain, HMA
TRIAE_CS42_6DL_TGACv1_526414_AA1682800	13	14	22	110	140	86	71	98	83	Oxoglutarate/iron-dependent dioxygenase
TRIAE_CS42_6DL_TGACv1_526575_AA1687400	9	6	13	98	49	69	36	44	47	consensus disorder prediction
TRIAE_CS42_6DL_TGACv1_526602_AA1688040	87	55	201	750	731	725	1285	2068	1898	Phosphate-induced protein 1
TRIAE_CS42_6DL_TGACv1_526602_AA1688050	134	65	241	761	730	735	566	888	912	Phosphate-induced protein 1
TRIAE_CS42_6DL_TGACv1_526602_AA1688060	307	144	700	1843	1896	1728	2557	3442	3491	Phosphate-induced protein 1
TRIAE_CS42_6DL_TGACv1_526629_AA1688510	627	444	569	3115	2328	2749	1432	2099	2308	Glutathione peroxidase active site
TRIAE_CS42_6DL_TGACv1_526661_AA1689260	7	43	9	179	270	243	6062	6911	5136	#N/A
TRIAE_CS42_6DL_TGACv1_526732_AA1690780	0	1	0	62	36	39	5	11	3	PGG domain
TRIAE_CS42_6DL_TGACv1_526736_AA1690940	162	142	142	1340	832	874	1057	912	1035	Peptidoglycan binding-like
TRIAE_CS42_6DL_TGACv1_526736_AA1690950	114	90	74	610	381	465	641	905	1166	consensus disorder prediction
TRIAE_CS42_6DL_TGACv1_526742_AA1691170	50	41	69	536	274	522	691	407	403	NAD-dependent epimerase/dehydratase
TRIAE_CS42_6DL_TGACv1_526775_AA1691850	47	22	26	302	123	219	400	368	403	consensus disorder prediction
TRIAE_CS42_6DL_TGACv1_526953_AA1695920	8	10	4	85	84	76	2874	2649	2453	#N/A
TRIAE_CS42_6DL_TGACv1_527065_AA1698010	33	38	12	867	861	847	1249	837	844	ACD_sHsps-like
TRIAE_CS42_6DL_TGACv1_527100_AA1698580	25	64	16	461	352	344	6829	12343	10932	Late embryogenesis abundant protein, LEA-25/LEA-D113
TRIAE_CS42_6DL_TGACv1_527107_AA1698680	5	1	3	28	24	19	25	39	30	Ethylene receptor
TRIAE_CS42_6DL_TGACv1_527185_AA1700110	425	378	515	12801	6806	9689	2135	1860	2199	PPM-type phosphatase domain
TRIAE_CS42_6DL_TGACv1_527316_AA1702110	14	8	190	386	191	528	601	1082	1600	NAD(P)-binding domain
TRIAE_CS42_6DL_TGACv1_527354_AA1702670	108	70	92	382	503	400	652	271	246	#N/A
TRIAE_CS42_6DL_TGACv1_527691_AA1707490	1	0	3	38	34	29	45	24	15	BES1/BZR1 plant transcription factor, N-terminal
TRIAE_CS42_6DL_TGACv1_527801_AA1708720	40	31	29	159	145	126	176	105	110	Armadillo-like helical
TRIAE_CS42_6DL_TGACv1_527980_AA1710380	5	2	2	21	14	19	22	23	13	Regulator of chromosome condensation, RCC1
TRIAE_CS42_6DL_TGACv1_527980_AA1710400	47	61	44	709	426	572	263	274	310	SANT/Myb domain
TRIAE_CS42_6DL_TGACv1_527996_AA1710550	39	59	30	318	233	232	185	125	148	Cytochrome b5-like heme/steroid binding domain
TRIAE_CS42_6DL_TGACv1_528125_AA1711790	6	4	11	107	144	129	103	28	34	consensus disorder prediction
TRIAE_CS42_6DL_TGACv1_528127_AA1711800	345	436	778	15363	11315	13192	1768	2272	2292	#N/A
TRIAE_CS42_6DL_TGACv1_528296_AA1713110	3	4	2	32	20	30	26	43	26	Pleckstrin homology domain
TRIAE_CS42_6DL_TGACv1_528520_AA1714750	10	2	2	532	292	326	44	26	15	Zinc finger, RING/FYVE/PHD-type
TRIAE_CS42_6DL_TGACv1_528583_AA1715140	65	34	62	399	268	344	984	203	351	Chloramphenicol acetyltransferase-like domain
TRIAE_CS42_6DS_TGACv1_542487_AA1722070	133	134	173	1825	814	1598	828	434	655	Protein of unknown function DUF4228, plant
TRIAE_CS42_6DS_TGACv1_542696_AA1728140	80	79	110	974	521	987	1133	518	573	UDP-glucuronosyl/UDP-glucosyltransferase
TRIAE_CS42_6DS_TGACv1_542788_AA1730440	232	221	171	1892	727	1015	1204	1008	720	consensus disorder prediction
TRIAE_CS42_6DS_TGACv1_542805_AA1730740	0	0	1	27	31	24	15	18	17	HSP20-like chaperone
TRIAE_CS42_6DS_TGACv1_543125_AA1735830	8220	6295	8304	40240	24794	39379	38587	27585	32775	Glutathione S-transferase, C-terminal
TRIAE_CS42_6DS_TGACv1_543125_AA1735850	129	131	79	4665	4427	4473	916	775	511	NADP-dependent oxidoreductase domain
TRIAE_CS42_6DS_TGACv1_543230_AA1737280	4	4	1	24	9	18	124	155	113	#N/A
TRIAE_CS42_6DS_TGACv1_543292_AA1738070	69	84	66	665	292	509	825	370	411	Alpha/Beta hydrolase fold
TRIAE_CS42_6DS_TGACv1_543630_AA1742350	97	140	58	383	736	535	1358	441	542	GT1_Gtf_like
TRIAE_CS42_6DS_TGACv1_543780_AA1744110	238	210	142	2756	1785	2875	1707	1489	1448	UDP-glucuronosyl/UDP-glucosyltransferase
TRIAE_CS42_7AL_TGACv1_555988_AA1751810	15	18	9	175	68	150	1917	2231	1698	Cleavage/polyadenylation specificity factor subunit 5
TRIAE_CS42_7AL_TGACv1_556071_AA1754550	41	33	40	263	136	235	284	154	172	VQ
TRIAE_CS42_7AL_TGACv1_556167_AA1757280	16	7	19	120	59	60	96	51	26	Amino acid transporter, transmembrane domain
TRIAE_CS42_7AL_TGACv1_556255_AA1759280	30	14	14	554	339	348	507	255	74	PMEI_like
TRIAE_CS42_7AL_TGACv1_556267_AA1759600	113	33	50	1090	615	766	656	1745	2746	AdipoR/Haemolysin-III-related
TRIAE_CS42_7AL_TGACv1_556453_AA1763360	7	8	1	76	66	58	2853	2886	2267	Late embryogenesis abundant protein, LEA-25/LEA-D113
TRIAE_CS42_7AL_TGACv1_556459_AA1763570	6	7	5	37	13	41	606	744	909	P-loop containing nucleoside triphosphate hydrolase
TRIAE_CS42_7AL_TGACv1_556681_AA1768690	5	16	5	249	63	128	1635	1492	1640	AP2/ERF domain
TRIAE_CS42_7AL_TGACv1_556751_AA1770290	5	0	1	50	48	41	15	34	33	consensus disorder prediction
TRIAE_CS42_7AL_TGACv1_557021_AA1775250	20	44	8	148	85	118	165	118	93	NAD(P)-binding domain
TRIAE_CS42_7AL_TGACv1_557348_AA1780060	78	51	43	916	258	617	411	311	404	Cysteine-rich transmembrane CYSTM domain
TRIAE_CS42_7AL_TGACv1_557348_AA1780070	3	1	0	16	12	28	222	560	689	Cysteine-rich transmembrane CYSTM domain
TRIAE_CS42_7AL_TGACv1_557388_AA1780620	364	314	244	4575	2058	2841	8471	10753	10218	Phytocyanin domain
TRIAE_CS42_7AL_TGACv1_557587_AA1783630	15	20	27	91	95	88	104	85	119	consensus disorder prediction
TRIAE_CS42_7AL_TGACv1_557894_AA1787480	58	27	33	650	348	433	220	146	293	Peptidase family A1 domain
TRIAE_CS42_7AL_TGACv1_559127_AA1798230	25	15	30	114	130	123	194	64	76	GNAT domain
TRIAE_CS42_7AL_TGACv1_559348_AA1799240	310	238	357	2548	1787	1523	1612	1809	2262	Cytochrome P450, conserved site
TRIAE_CS42_7AL_TGACv1_559622_AA1800320	41	41	74	629	241	477	5787	7159	5333	PPM-type phosphatase domain
TRIAE_CS42_7AL_TGACv1_560178_AA1801810	21	20	37	131	120	109	157	161	163	consensus disorder prediction
TRIAE_CS42_7AL_TGACv1_560178_AA1801820	80	77	105	518	350	448	586	647	524	consensus disorder prediction
TRIAE_CS42_7AL_TGACv1_560184_AA1801850	25	28	18	164	106	145	256	214	172	consensus disorder prediction
TRIAE_CS42_7AS_TGACv1_569084_AA1806770	33	35	66	1552	843	1278	432	168	265	consensus disorder prediction
TRIAE_CS42_7AS_TGACv1_569099_AA1807130	15	23	23	230	124	206	442	162	135	consensus disorder prediction
TRIAE_CS42_7AS_TGACv1_569427_AA1815550	2	9	0	21	47	29	3822	4889	4629	Late embryogenesis abundant protein, LEA-25/LEA-D113
TRIAE_CS42_7AS_TGACv1_569447_AA1816180	676	686	550	4395	4175	3681	3147	4068	4173	Cytochrome b561/ferric reductase transmembrane
TRIAE_CS42_7AS_TGACv1_569473_AA1816900	41	40	55	965	287	1162	937	223	325	Glutathione S-transferase, N-terminal
TRIAE_CS42_7AS_TGACv1_569501_AA1817630	3	8	2	125	88	68	520	372	248	consensus disorder prediction
TRIAE_CS42_7AS_TGACv1_569501_AA1817640	7	9	2	29	31	26	847	807	728	Linker histone H1/H5, domain H15
TRIAE_CS42_7AS_TGACv1_569634_AA1820740	38	66	29	578	380	336	684	872	683	DnaJ domain
TRIAE_CS42_7AS_TGACv1_570012_AA1828650	4	4	1	71	39	48	39	13	28	#N/A
TRIAE_CS42_7AS_TGACv1_570040_AA1829250	32	46	44	1340	1118	962	425	414	372	Winged helix-turn-helix DNA-binding domain
TRIAE_CS42_7AS_TGACv1_570286_AA1833310	8	9	14	77	18	60	366	161	173	Glutathione S-transferase, N-terminal
TRIAE_CS42_7AS_TGACv1_570399_AA1835100	8	19	15	145	76	90	234	236	176	Protein kinase domain
TRIAE_CS42_7AS_TGACv1_570690_AA1839360	1	4	0	59	71	72	1813	2344	1969	AP2/ERF domain
TRIAE_CS42_7AS_TGACv1_570690_AA1839370	35	4	3	241	242	225	1291	1493	1311	DNA-binding domain
TRIAE_CS42_7AS_TGACv1_570837_AA1841510	35	9	25	142	102	152	95	85	103	consensus disorder prediction
TRIAE_CS42_7AS_TGACv1_571347_AA1847000	48	42	35	532	431	476	408	140	162	Pentatricopeptide repeat
TRIAE_CS42_7AS_TGACv1_571347_AA1847010	582	435	808	6767	3026	4966	3840	1581	2246	#N/A
TRIAE_CS42_7AS_TGACv1_571537_AA1848440	9	4	7	39	34	18	90	70	70	ATPase, AAA-type, conserved site
TRIAE_CS42_7AS_TGACv1_571539_AA1848450	40	23	47	747	498	594	435	225	205	#N/A
TRIAE_CS42_7AS_TGACv1_571584_AA1848770	13	14	5	99	71	67	51	42	25	Protein of unknown function DUF868, plant
TRIAE_CS42_7AS_TGACv1_572705_AA1852410	282	240	277	1476	917	1163	2852	1131	1396	consensus disorder prediction
TRIAE_CS42_7BL_TGACv1_576809_AA1855610	5	16	6	114	68	50	77	68	23	Pectinesterase inhibitor domain
TRIAE_CS42_7BL_TGACv1_576926_AA1860160	129	77	98	1454	572	1061	645	338	420	consensus disorder prediction
TRIAE_CS42_7BL_TGACv1_577044_AA1863860	544	489	376	7462	4623	6098	2596	1720	1444	#N/A
TRIAE_CS42_7BL_TGACv1_577127_AA1866660	393	248	253	3078	1271	2025	4354	5311	5087	OsENODL1_like
TRIAE_CS42_7BL_TGACv1_577128_AA1866750	41	34	36	1391	774	974	401	255	144	P-loop containing nucleoside triphosphate hydrolase
TRIAE_CS42_7BL_TGACv1_577469_AA1876020	34	39	37	2833	1796	2248	294	108	117	consensus disorder prediction
TRIAE_CS42_7BL_TGACv1_577674_AA1880700	260	321	293	5580	3234	3266	1383	1536	2034	Cytochrome P450
TRIAE_CS42_7BL_TGACv1_577927_AA1886320	5	9	7	141	55	91	1510	1926	1242	PPM-type phosphatase domain
TRIAE_CS42_7BL_TGACv1_578186_AA1890760	2	4	2	22	35	45	2090	2536	1818	#N/A
TRIAE_CS42_7BL_TGACv1_578253_AA1891990	1	0	1	16	7	8	80	81	57	B-box-type zinc finger
TRIAE_CS42_7BL_TGACv1_578443_AA1895050	98	94	130	720	211	558	741	218	300	consensus disorder prediction
TRIAE_CS42_7BL_TGACv1_578619_AA1897830	353	336	431	2975	1407	2435	5645	7063	8853	consensus disorder prediction
TRIAE_CS42_7BL_TGACv1_578619_AA1897840	79	50	60	964	491	782	2294	3776	4441	consensus disorder prediction
TRIAE_CS42_7BL_TGACv1_579094_AA1904050	85	40	51	1717	948	1202	612	1620	2607	AdipoR/Haemolysin-III-related
TRIAE_CS42_7BL_TGACv1_579153_AA1904680	44	95	21	532	308	329	3707	4714	3855	Cleavage/polyadenylation specificity factor subunit 5
TRIAE_CS42_7BL_TGACv1_579314_AA1906350	5	18	3	53	35	45	392	298	233	#N/A
TRIAE_CS42_7BL_TGACv1_579475_AA1907670	3	10	4	94	84	61	91	55	67	consensus disorder prediction
TRIAE_CS42_7BL_TGACv1_579560_AA1908430	0	4	2	21	8	9	21	22	14	Casparian strip membrane protein
TRIAE_CS42_7BL_TGACv1_579731_AA1909750	3	12	9	40	34	35	39	41	27	consensus disorder prediction
TRIAE_CS42_7BL_TGACv1_580104_AA1912060	138	258	252	1592	1016	1443	1293	446	651	#N/A
TRIAE_CS42_7BL_TGACv1_580707_AA1915150	213	247	270	2936	2179	2456	2067	765	645	NAD(P)-binding domain
TRIAE_CS42_7BL_TGACv1_731192_AA2173260	0	1	0	21	30	13	179	383	348	#N/A
TRIAE_CS42_7BS_TGACv1_591794_AA1921410	162	61	104	1307	751	710	1618	2773	2909	Protein of unknown function DUF761, plant
TRIAE_CS42_7BS_TGACv1_591928_AA1925890	69	29	67	1092	618	958	327	145	257	consensus disorder prediction
TRIAE_CS42_7BS_TGACv1_591938_AA1926050	48	34	33	613	367	388	754	282	220	2'-5' RNA ligase superfamily
TRIAE_CS42_7BS_TGACv1_592106_AA1930640	14	9	7	71	28	56	50	16	43	#N/A
TRIAE_CS42_7BS_TGACv1_592120_AA1931070	186	226	261	1576	1077	1529	1404	669	889	OYE_like_FMN
TRIAE_CS42_7BS_TGACv1_592186_AA1932820	92	167	104	1177	569	834	1088	657	686	#N/A
TRIAE_CS42_7BS_TGACv1_592325_AA1935670	77	108	77	1817	1373	1230	428	443	419	consensus disorder prediction
TRIAE_CS42_7BS_TGACv1_592446_AA1938310	7	6	6	88	58	61	44	28	38	Protein of unknown function DUF868, plant
TRIAE_CS42_7BS_TGACv1_592587_AA1940840	179	76	84	3715	1981	2025	567	754	1131	#N/A
TRIAE_CS42_7BS_TGACv1_592638_AA1942000	11	12	17	270	125	201	102	40	67	consensus disorder prediction
TRIAE_CS42_7BS_TGACv1_592687_AA1943100	38	30	31	297	217	328	140	122	110	Helicase, C-terminal
TRIAE_CS42_7BS_TGACv1_592829_AA1944830	21	15	14	175	133	151	376	385	256	consensus disorder prediction
TRIAE_CS42_7BS_TGACv1_593131_AA1948450	283	197	234	2231	1290	1890	1872	851	1306	consensus disorder prediction
TRIAE_CS42_7BS_TGACv1_593276_AA1950030	13	30	11	151	168	105	125	163	71	consensus disorder prediction
TRIAE_CS42_7BS_TGACv1_593677_AA1953710	0	2	0	5	10	11	34	19	12	consensus disorder prediction
TRIAE_CS42_7BS_TGACv1_593837_AA1954700	140	142	140	866	556	668	2280	2829	2072	PB1 domain
TRIAE_CS42_7DL_TGACv1_602708_AA1966080	25	19	26	161	121	141	804	876	852	consensus disorder prediction
TRIAE_CS42_7DL_TGACv1_602796_AA1968890	3	3	3	51	9	63	187	44	40	#N/A
TRIAE_CS42_7DL_TGACv1_602965_AA1972830	398	332	325	2344	1337	2723	4549	6156	7737	consensus disorder prediction
TRIAE_CS42_7DL_TGACv1_602965_AA1972840	20	17	18	420	263	428	310	482	618	Cysteine-rich transmembrane CYSTM domain
TRIAE_CS42_7DL_TGACv1_603013_AA1973770	31	9	19	798	746	706	81	60	122	consensus disorder prediction
TRIAE_CS42_7DL_TGACv1_603335_AA1981190	6	4	8	521	531	496	102	36	93	WRKY domain
TRIAE_CS42_7DL_TGACv1_603335_AA1981210	1	0	0	122	85	79	18	5	9	WRKY domain
TRIAE_CS42_7DL_TGACv1_603422_AA1983410	21	36	18	168	102	109	535	588	567	P-loop containing nucleoside triphosphate hydrolase
TRIAE_CS42_7DL_TGACv1_603434_AA1983620	16	24	31	3805	2047	2907	131	113	104	consensus disorder prediction
TRIAE_CS42_7DL_TGACv1_603474_AA1984410	145	86	123	2088	1130	1261	612	497	638	Aspartic peptidase A1 family
TRIAE_CS42_7DL_TGACv1_603500_AA1984880	49	110	96	1746	847	1082	12488	14510	12216	PPM-type phosphatase domain
TRIAE_CS42_7DL_TGACv1_603768_AA1988840	11	32	10	362	265	295	7855	7188	6016	Late embryogenesis abundant protein, LEA-25/LEA-D113
TRIAE_CS42_7DL_TGACv1_603795_AA1989350	1600	1633	1737	14777	11520	14650	8019	7139	6284	Cytochrome P450, E-class, group I
TRIAE_CS42_7DL_TGACv1_603857_AA1990250	120	162	126	1720	927	956	757	814	966	Cytochrome P450
TRIAE_CS42_7DL_TGACv1_603892_AA1990770	4	2	2	17	14	17	17	7	13	Reverse transcriptase domain
TRIAE_CS42_7DL_TGACv1_603892_AA1990780	7	5	8	56	32	42	66	29	33	consensus disorder prediction
TRIAE_CS42_7DL_TGACv1_603896_AA1990910	11	21	13	259	168	255	153	203	172	#N/A
TRIAE_CS42_7DL_TGACv1_603941_AA1991460	146	110	116	1203	937	942	440	441	456	consensus disorder prediction
TRIAE_CS42_7DL_TGACv1_603951_AA1991560	189	174	186	1437	1376	1351	951	761	676	#N/A
TRIAE_CS42_7DL_TGACv1_604021_AA1992540	117	126	52	970	339	746	4842	4770	3886	Cleavage/polyadenylation specificity factor subunit 5
TRIAE_CS42_7DL_TGACv1_604075_AA1993380	3	4	4	24	12	19	21	17	26	consensus disorder prediction
TRIAE_CS42_7DL_TGACv1_604135_AA1994270	55	41	36	214	304	205	160	381	363	Acyl transferase/acyl hydrolase/lysophospholipase
TRIAE_CS42_7DL_TGACv1_604291_AA1996320	18	26	21	426	247	263	531	217	84	PMEI_like
TRIAE_CS42_7DL_TGACv1_604464_AA1998380	255	214	249	11250	5906	8358	1780	660	718	P-loop containing nucleoside triphosphate hydrolase
TRIAE_CS42_7DL_TGACv1_604512_AA1998880	230	97	183	3129	1585	2339	1074	861	1034	consensus disorder prediction
TRIAE_CS42_7DL_TGACv1_604512_AA1998890	80	23	40	581	332	397	208	181	269	Cysteine-rich transmembrane CYSTM domain
TRIAE_CS42_7DL_TGACv1_604737_AA2001160	68	37	31	1303	1068	916	750	1886	2735	AdipoR/Haemolysin-III-related
TRIAE_CS42_7DL_TGACv1_605072_AA2004460	0	1	0	31	25	43	110	110	121	#N/A
TRIAE_CS42_7DL_TGACv1_605193_AA2005320	2	2	4	66	69	65	17	29	18	consensus disorder prediction
TRIAE_CS42_7DL_TGACv1_605451_AA2006630	19	29	12	138	270	152	11725	15554	11532	Seed maturation protein
TRIAE_CS42_7DL_TGACv1_605679_AA2007650	5	3	4	37	52	35	63	24	14	consensus disorder prediction
TRIAE_CS42_7DL_TGACv1_606497_AA2010280	6	0	10	18	27	46	139	199	303	RING
TRIAE_CS42_7DL_TGACv1_606740_AA2010540	3	4	3	16	47	29	699	636	597	#N/A
TRIAE_CS42_7DS_TGACv1_621369_AA2013160	8	0	3	43	41	30	19	22	32	#N/A
TRIAE_CS42_7DS_TGACv1_621369_AA2013170	840	756	716	4279	3613	3481	2844	4367	4442	DOMON domain
TRIAE_CS42_7DS_TGACv1_621432_AA2015310	258	163	150	1415	1049	1183	1272	1959	2452	#N/A
TRIAE_CS42_7DS_TGACv1_621446_AA2015840	36	90	79	1147	771	843	373	349	391	Winged helix-turn-helix DNA-binding domain
TRIAE_CS42_7DS_TGACv1_621499_AA2017470	9	3	0	19	76	59	2345	3140	2731	AP2/ERF domain
TRIAE_CS42_7DS_TGACv1_621499_AA2017480	6	0	0	26	41	26	1234	1659	1384	DNA-binding domain
TRIAE_CS42_7DS_TGACv1_621664_AA2022610	25	0	0	140	143	130	29	45	71	CO/COL/TOC1, conserved site
TRIAE_CS42_7DS_TGACv1_621699_AA2023540	9	16	9	86	45	68	193	102	81	consensus disorder prediction
TRIAE_CS42_7DS_TGACv1_621709_AA2023960	2	3	4	84	51	79	72	21	20	#N/A
TRIAE_CS42_7DS_TGACv1_621741_AA2025020	1	1	1	12	4	17	196	336	432	Pyridoxal phosphate-dependent transferase
TRIAE_CS42_7DS_TGACv1_621781_AA2025940	0	1	1	14	4	10	7	5	9	Endonuclease/exonuclease/phosphatase
TRIAE_CS42_7DS_TGACv1_621836_AA2027270	54	30	41	422	171	321	488	178	203	#N/A
TRIAE_CS42_7DS_TGACv1_621836_AA2027280	87	28	63	865	426	571	368	266	379	#N/A
TRIAE_CS42_7DS_TGACv1_621955_AA2030260	357	349	439	3466	1775	2819	2930	1039	1544	consensus disorder prediction
TRIAE_CS42_7DS_TGACv1_622038_AA2031410	165	212	324	1241	1095	1303	1195	1036	1159	#N/A
TRIAE_CS42_7DS_TGACv1_622117_AA2033050	165	415	113	1634	1047	1078	8169	9539	7332	consensus disorder prediction
TRIAE_CS42_7DS_TGACv1_622140_AA2033640	56	54	99	2869	1440	1952	531	207	318	Aldolase-type TIM barrel
TRIAE_CS42_7DS_TGACv1_622141_AA2033670	4	6	3	50	24	33	66	60	53	RNA ligase/cyclic nucleotide phosphodiesterase
TRIAE_CS42_7DS_TGACv1_622143_AA2033770	67	53	108	2071	1838	1837	752	487	364	NAD(P)-binding domain
TRIAE_CS42_7DS_TGACv1_622185_AA2034810	581	324	451	4532	2688	3490	1431	1726	2166	#N/A
TRIAE_CS42_7DS_TGACv1_622253_AA2036430	1	0	4	34	14	25	17	6	15	#N/A
TRIAE_CS42_7DS_TGACv1_622259_AA2036610	3	1	3	78	25	36	8	21	15	#N/A
TRIAE_CS42_7DS_TGACv1_622427_AA2039520	21	26	23	1743	1119	1273	215	90	133	NADH:flavin oxidoreductase/NADH oxidase, N-terminal
TRIAE_CS42_7DS_TGACv1_622552_AA2041690	183	279	248	1690	973	1376	1443	1550	1572	DnaJ domain
TRIAE_CS42_7DS_TGACv1_622598_AA2042330	12	16	12	80	45	77	50	68	59	Protein of unknown function DUF868, plant
TRIAE_CS42_7DS_TGACv1_622653_AA2043310	119	59	63	621	509	523	558	371	512	U box domain
TRIAE_CS42_7DS_TGACv1_623109_AA2049690	0	1	1	7	12	5	17	4	6	#N/A
TRIAE_CS42_7DS_TGACv1_623278_AA2051550	27	19	46	487	555	375	660	157	187	EF-hand domain pair
TRIAE_CS42_7DS_TGACv1_623292_AA2051660	9	4	4	211	196	181	26	23	32	Tify domain
TRIAE_CS42_7DS_TGACv1_623297_AA2051700	146	133	73	462	596	580	820	1463	2004	Homeodomain-like
TRIAE_CS42_7DS_TGACv1_623526_AA2054180	2	0	1	21	17	22	12	5	9	consensus disorder prediction
TRIAE_CS42_7DS_TGACv1_623759_AA2055930	6	4	9	56	32	38	30	31	22	#N/A
TRIAE_CS42_7DS_TGACv1_623960_AA2057810	17	4	6	60	42	38	66	36	54	consensus disorder prediction
TRIAE_CS42_7DS_TGACv1_624199_AA2059650	227	240	231	1482	890	1076	3495	3937	2695	#N/A
TRIAE_CS42_7DS_TGACv1_624462_AA2061550	6	1	11	362	274	435	54	13	25	Cupredoxin
TRIAE_CS42_7DS_TGACv1_624872_AA2063640	35	27	27	334	454	453	9557	10491	9204	Late embryogenesis abundant protein, LEA-25/LEA-D113
TRIAE_CS42_7DS_TGACv1_624980_AA2064150	21	6	21	204	170	181	173	101	64	#N/A
TRIAE_CS42_7DS_TGACv1_625862_AA2065960	4	2	0	36	21	16	92	172	141	Myb domain
TRIAE_CS42_U_TGACv1_640710_AA2070430	40	42	27	623	641	609	315	154	201	Alpha crystallin/Hsp20 domain
TRIAE_CS42_U_TGACv1_640727_AA2071170	24	32	36	245	145	170	168	208	204	consensus disorder prediction
TRIAE_CS42_U_TGACv1_640727_AA2071180	27	66	42	378	324	286	375	519	459	DnaJ domain
TRIAE_CS42_U_TGACv1_640819_AA2075650	2	1	0	106	91	74	650	957	549	F-box domain
TRIAE_CS42_U_TGACv1_640921_AA2079150	44	59	60	310	255	256	286	197	197	#N/A
TRIAE_CS42_U_TGACv1_640945_AA2080110	5	9	5	29	43	33	463	475	329	Protein of unknown function DUF599
TRIAE_CS42_U_TGACv1_641065_AA2084010	19	10	8	512	412	541	357	111	93	#N/A
TRIAE_CS42_U_TGACv1_641143_AA2086540	80	60	167	3985	4085	3710	915	1469	1825	consensus disorder prediction
TRIAE_CS42_U_TGACv1_641160_AA2087000	7	30	26	134	71	97	131	75	114	Proton-dependent oligopeptide transporter family
TRIAE_CS42_U_TGACv1_641488_AA2096270	5	4	12	92	142	118	165	176	197	#N/A
TRIAE_CS42_U_TGACv1_641524_AA2097150	21	22	23	190	208	132	222	115	91	consensus disorder prediction
TRIAE_CS42_U_TGACv1_641545_AA2097630	159	204	198	942	839	860	3609	4436	4164	Basic-leucine zipper domain
TRIAE_CS42_U_TGACv1_641571_AA2098410	72	25	43	936	568	564	460	384	483	Aspartic peptidase domain
TRIAE_CS42_U_TGACv1_641767_AA2103740	56	88	101	4052	3272	2627	472	154	308	#N/A
TRIAE_CS42_U_TGACv1_641880_AA2106590	24	44	2	100	215	174	8135	8140	6161	#N/A
TRIAE_CS42_U_TGACv1_642095_AA2111320	8	2	11	718	424	422	150	256	354	STKc_MAPKKK
TRIAE_CS42_U_TGACv1_642113_AA2111690	0	10	6	42	24	25	136	130	140	Chloramphenicol acetyltransferase-like domain
TRIAE_CS42_U_TGACv1_642157_AA2112440	106	73	108	3676	2278	2925	1032	323	452	consensus disorder prediction
TRIAE_CS42_U_TGACv1_642157_AA2112450	122	93	199	6334	3115	5517	1985	650	992	consensus disorder prediction
TRIAE_CS42_U_TGACv1_642190_AA2112970	67	152	101	2023	416	830	634	327	392	consensus disorder prediction
TRIAE_CS42_U_TGACv1_642209_AA2113380	10	7	22	111	61	82	645	1336	1411	WD40 repeat
TRIAE_CS42_U_TGACv1_642676_AA2121380	8	8	14	88	58	59	223	245	224	consensus disorder prediction
TRIAE_CS42_U_TGACv1_642775_AA2123100	39	23	14	266	153	123	472	636	432	Sodium/calcium exchanger membrane region
TRIAE_CS42_U_TGACv1_643016_AA2126240	5	9	1	171	220	122	106	39	62	#N/A
TRIAE_CS42_U_TGACv1_643140_AA2127810	40	37	46	217	214	211	177	166	117	#N/A
TRIAE_CS42_U_TGACv1_643392_AA2131580	74	159	37	773	643	731	29127	34934	29117	consensus disorder prediction
TRIAE_CS42_U_TGACv1_643560_AA2132980	47	66	54	560	461	445	718	204	263	EF-hand domain
TRIAE_CS42_U_TGACv1_643560_AA2133000	1449	790	2067	7820	6540	8337	5765	3461	7472	consensus disorder prediction
TRIAE_CS42_U_TGACv1_643616_AA2133590	26	80	78	1129	1028	714	3658	2337	2896	consensus disorder prediction
TRIAE_CS42_U_TGACv1_643740_AA2134580	41	12	19	460	209	371	151	107	133	#N/A
TRIAE_CS42_U_TGACv1_643770_AA2134850	196	242	391	1405	1464	1581	1183	981	831	Glycoside hydrolase superfamily
TRIAE_CS42_U_TGACv1_644144_AA2137560	142	171	175	835	696	849	1261	517	461	Glycoside hydrolase family 18, catalytic domain
TRIAE_CS42_U_TGACv1_644603_AA2140590	31	30	41	537	363	444	217	143	213	UDP-glucuronosyl/UDP-glucosyltransferase
TRIAE_CS42_U_TGACv1_644604_AA2140600	32	17	16	1219	1081	959	169	66	175	#N/A
TRIAE_CS42_U_TGACv1_667220_AA2154590	21	16	15	171	301	123	2705	2982	2284	consensus disorder prediction
TRIAE_CS42_U_TGACv1_671876_AA2155860	12	14	5	241	69	138	229	246	137	#N/A
TRIAE_CS42_U_TGACv1_712376_AA2166870	20	19	17	629	578	691	201	112	141	Heat shock factor (HSF)-type, DNA-binding
TRIAE_CS42_U_TGACv1_733723_AA2174200	2	6	1	198	137	119	149	158	142	#N/A
Novel00568	16	4	18	0	0	3	0	0	0	Peroxidase 2 [Triticum urartu]
Novel01551	89	62	53	19	16	11	13	10	20	#N/A
Novel01684	97	53	74	21	5	15	4	6	9	Putative disease resistance protein [Aegilops tauschii]
Novel01798	31	46	21	8	3	10	4	3	4	#N/A
Novel02016	116	155	65	5	6	16	54	15	5	Putative ribonuclease H protein [Aegilops tauschii]
Novel02158	306	342	183	70	28	38	19	17	15	Putative disease resistance protein RGA4 [Aegilops tauschii]
Novel02909	17	19	11	1	5	3	2	1	1	predicted protein [Hordeum vulgare subsp. vulgare]>gi|326523161|dbj|BAJ88621.1| predicted protein [Hordeum vulgare subsp. vulgare]
Novel03417	49	39	25	3	1	1	0	2	0	Disease resistance protein RGA2 [Aegilops tauschii]
Novel03580	55	57	24	14	4	9	6	3	3	#N/A
Novel04413	123	136	82	23	24	15	35	22	9	predicted protein [Hordeum vulgare subsp. vulgare]
Novel04458	113	99	75	2	7	6	15	11	12	hypothetical protein TRIUR3_31648 [Triticum urartu]
Novel05030	15	7	7	0	0	0	1	0	2	PREDICTED: uncharacterized protein LOC103627826 isoform X1 [Zea mays]
Novel05112	289	238	195	51	22	32	5	5	9	glucan endo-1,3-beta-glucosidase GII precursor,putative, expressed [Triticum aestivum]
Novel05124	258	314	196	71	43	44	38	37	43	putative cytochrome P450 [Lolium rigidum]
Novel05463	112	58	45	26	5	20	13	15	7	hypothetical protein F775_13942 [Aegilops tauschii]
Novel05749	50	40	41	1	6	3	4	1	2	putative cytochrome P450 [Lolium rigidum]
Novel05922	64	54	24	13	5	5	1	1	0	hypothetical protein F775_04286 [Aegilops tauschii]
Novel06046	710	323	458	161	19	84	20	68	123	Potassium transporter 1 [Triticum urartu]
Novel06698	40	16	34	3	5	3	0	0	0	predicted protein [Hordeum vulgare subsp. vulgare]
Novel07646	37	58	25	6	7	3	6	8	3	ribosomal protein S2, partial (chloroplast) [Triticum timopheevii]
Novel07844	34	49	32	16	7	7	10	6	6	predicted protein [Hordeum vulgare subsp. vulgare]
Novel07998	17	9	13	0	0	0	0	0	0	unnamed protein product [Triticum aestivum]
Novel08251	23	11	15	1	0	5	1	1	2	Cellulose synthase-like protein D4 [Triticum urartu]
Novel08677	25	24	22	5	3	2	3	4	6	hypothetical protein TRIUR3_11267 [Triticum urartu]
Novel08696	322	431	336	72	43	79	64	74	55	hypothetical protein TRIUR3_01416 [Triticum urartu]
Novel08812	19	23	21	6	1	3	1	5	3	#N/A
Novel08950	40	47	37	9	4	6	2	1	2	#N/A
Novel10284	62	62	28	8	10	12	10	12	3	PREDICTED: LOW QUALITY PROTEIN: 50S ribosomal protein L2, chloroplastic-like [Solanum lycopersicum]
Novel10341	33	9	20	6	0	1	0	0	0	high affinity nitrate transporter [Triticum aestivum]
Novel10359	28	8	13	1	0	2	0	0	5	Disease resistance protein RPM1 [Aegilops tauschii]
Novel11488	11	4	11	1	0	0	0	2	0	#N/A
Novel12024	38	25	25	9	2	2	0	2	2	PREDICTED: disease resistance protein RPM1-like [Brachypodium distachyon]
Novel12448	55	81	51	24	12	14	9	0	2	AP-2 complex subunit mu [Aegilops tauschii]
Novel13135	25	32	9	4	3	0	4	1	4	Iron sulfur cluster assembly protein 1, mitochondrial [Triticum urartu]
TRIAE_CS42_1AL_TGACv1_000407_AA0011380	272	245	318	58	51	59	23	56	47	RlpA-like protein, double-psi beta-barrel domain
TRIAE_CS42_1AL_TGACv1_001027_AA0023700	37	11	37	11	6	2	0	1	2	Protein kinase-like domain
TRIAE_CS42_1AL_TGACv1_001032_AA0023810	267	250	509	58	72	61	21	88	53	consensus disorder prediction
TRIAE_CS42_1AL_TGACv1_001208_AA0027000	161	156	107	39	28	43	2	1	2	#N/A
TRIAE_CS42_1AL_TGACv1_001490_AA0031240	30	36	34	9	5	5	0	1	0	DVL
TRIAE_CS42_1AL_TGACv1_002021_AA0037930	23	22	17	2	3	6	2	3	0	#N/A
TRIAE_CS42_1AL_TGACv1_002159_AA0039260	28	19	20	7	0	8	0	1	0	consensus disorder prediction
TRIAE_CS42_1AL_TGACv1_002689_AA0044440	26	28	25	2	7	2	0	0	1	Non-haem dioxygenase N-terminal domain
TRIAE_CS42_1AL_TGACv1_003247_AA0048900	544	679	557	162	128	140	88	172	119	Expansin, cellulose-binding-like domain
TRIAE_CS42_1AL_TGACv1_004277_AA0053020	16	10	9	3	3	1	0	1	0	Major facilitator superfamily domain
TRIAE_CS42_1AS_TGACv1_019185_AA0062580	1233	855	791	319	76	225	50	59	40	Sugar transporter, conserved site
TRIAE_CS42_1AS_TGACv1_019644_AA0069350	191	202	196	56	35	46	9	8	15	P-loop containing nucleoside triphosphate hydrolase
TRIAE_CS42_1AS_TGACv1_019754_AA0071040	33	15	28	5	3	1	0	0	0	Serine/threonine-protein kinase, active site
TRIAE_CS42_1AS_TGACv1_019754_AA0071050	32	39	31	0	1	3	0	0	0	consensus disorder prediction
TRIAE_CS42_1AS_TGACv1_019754_AA0071070	13	18	6	3	4	1	0	0	0	Protein of unknown function DUF247, plant
TRIAE_CS42_1BL_TGACv1_030243_AA0083490	19	20	24	1	6	2	0	0	2	#N/A
TRIAE_CS42_1BL_TGACv1_030348_AA0087660	25	29	35	5	12	4	2	2	4	DnaJ domain
TRIAE_CS42_1BL_TGACv1_030557_AA0093940	93	107	95	30	20	27	12	16	23	#N/A
TRIAE_CS42_1BL_TGACv1_030589_AA0094880	1013	1361	683	289	173	213	166	158	234	Homeodomain-like
TRIAE_CS42_1BL_TGACv1_030980_AA0105010	97	112	82	19	18	17	4	8	6	consensus disorder prediction
TRIAE_CS42_1BL_TGACv1_031095_AA0107460	23	12	19	3	5	4	0	0	0	Protein of unknown function DUF247, plant
TRIAE_CS42_1BL_TGACv1_031149_AA0108720	123	115	112	18	22	35	5	1	9	Reverse transcriptase domain
TRIAE_CS42_1BL_TGACv1_031523_AA0115550	924	976	757	254	172	158	96	80	53	Rubredoxin-type fold
TRIAE_CS42_1BL_TGACv1_031639_AA0117690	15	13	5	0	1	0	0	0	2	Uncharacterised domain Wax2, C-terminal
TRIAE_CS42_1BL_TGACv1_031702_AA0119210	107	90	82	24	26	21	2	8	4	Chalcone/stilbene synthase, C-terminal
TRIAE_CS42_1BL_TGACv1_031813_AA0121000	105	119	59	21	17	16	21	11	10	consensus disorder prediction
TRIAE_CS42_1BL_TGACv1_033437_AA0139410	11	25	8	0	1	0	4	0	0	consensus disorder prediction
TRIAE_CS42_1BL_TGACv1_034214_AA0143800	181	230	131	48	37	40	38	10	17	Expansin, cellulose-binding-like domain
TRIAE_CS42_1BL_TGACv1_035347_AA0146460	42	55	28	18	4	6	2	2	2	Transcription factor GRAS
TRIAE_CS42_1BS_TGACv1_049780_AA0161240	65	56	63	12	18	11	4	1	4	Arabinogalactan peptide, AGP
TRIAE_CS42_1BS_TGACv1_050582_AA0173640	22	13	21	5	1	8	1	3	4	Cytochrome P450
TRIAE_CS42_1BS_TGACv1_050697_AA0174530	37	59	44	9	15	8	10	10	5	Protein of unknown function DUF4228, plant
TRIAE_CS42_1DL_TGACv1_061085_AA0184620	19	18	17	5	2	4	0	0	0	#N/A
TRIAE_CS42_1DL_TGACv1_061147_AA0186980	16	7	28	0	2	4	0	1	0	SANT/Myb domain
TRIAE_CS42_1DL_TGACv1_061325_AA0192410	207	164	230	44	35	36	4	4	7	Ovate protein family, C-terminal
TRIAE_CS42_1DL_TGACv1_061346_AA0192800	20	48	29	8	8	8	3	6	6	#N/A
TRIAE_CS42_1DL_TGACv1_061424_AA0194950	47	51	57	14	14	12	7	7	4	Cytochrome b561/ferric reductase transmembrane
TRIAE_CS42_1DL_TGACv1_062107_AA0208850	388	513	185	85	45	76	92	42	27	Major pollen allergen Lol pI
TRIAE_CS42_1DL_TGACv1_062839_AA0220750	441	395	428	65	90	135	34	53	80	#N/A
TRIAE_CS42_1DL_TGACv1_063088_AA0223760	43	28	18	12	6	3	2	1	0	FAD-binding, type 2
TRIAE_CS42_1DL_TGACv1_064458_AA0234560	8	9	12	3	1	1	1	0	0	Protein kinase domain
TRIAE_CS42_1DL_TGACv1_065209_AA0236720	42	44	41	8	4	8	0	2	0	Protein of unknown function DUF247, plant
TRIAE_CS42_1DS_TGACv1_080114_AA0239890	12	14	3	2	1	1	1	0	1	Chloramphenicol acetyltransferase-like domain
TRIAE_CS42_1DS_TGACv1_080114_AA0239920	123	74	79	18	10	19	20	20	12	NB-ARC
TRIAE_CS42_1DS_TGACv1_080468_AA0248530	5	14	6	1	1	1	0	0	0	Protein of unknown function DUF247, plant
TRIAE_CS42_1DS_TGACv1_080658_AA0251730	171	303	213	48	53	70	11	13	11	consensus disorder prediction
TRIAE_CS42_1DS_TGACv1_081076_AA0257470	237	200	249	62	34	42	10	24	14	#N/A
TRIAE_CS42_2AL_TGACv1_093085_AA0271580	30	27	20	0	0	2	0	0	1	#N/A
TRIAE_CS42_2AL_TGACv1_093085_AA0271600	57	27	66	1	9	6	0	0	2	Protein of unknown function DUF247, plant
TRIAE_CS42_2AL_TGACv1_093114_AA0272300	15	19	24	5	1	3	1	1	0	Ankyrin repeat
TRIAE_CS42_2AL_TGACv1_093217_AA0275290	13	36	19	4	1	5	2	6	0	S-adenosyl-L-methionine-dependent methyltransferase
TRIAE_CS42_2AL_TGACv1_093231_AA0275570	69	108	31	13	7	5	8	4	13	Zinc finger, Dof-type
TRIAE_CS42_2AL_TGACv1_093301_AA0276980	110	21	66	18	3	4	2	0	2	UDP-glucuronosyl/UDP-glucosyltransferase
TRIAE_CS42_2AL_TGACv1_093976_AA0290530	17	31	44	1	1	0	6	5	2	Galactose-binding domain-like
TRIAE_CS42_2AL_TGACv1_094027_AA0291250	20	14	10	5	1	0	0	0	0	Leucine-rich repeat domain, L domain-like
TRIAE_CS42_2AL_TGACv1_094156_AA0293440	31	43	32	8	3	4	3	2	5	#N/A
TRIAE_CS42_2AL_TGACv1_094197_AA0294150	45	16	32	11	4	10	4	3	4	Concanavalin A-like lectin/glucanase domain
TRIAE_CS42_2AL_TGACv1_094218_AA0294690	119	164	125	20	29	41	34	14	23	Protein of unknown function wound-induced
TRIAE_CS42_2AL_TGACv1_094679_AA0301370	118	76	119	49	17	20	12	6	5	Protein of unknown function DUF247, plant
TRIAE_CS42_2AL_TGACv1_094687_AA0301520	3443	2932	3342	1079	482	707	314	255	313	Isopenicillin N synthase-like
TRIAE_CS42_2AL_TGACv1_094691_AA0301620	1316	2557	935	441	226	350	195	164	179	consensus disorder prediction
TRIAE_CS42_2AL_TGACv1_095265_AA0308900	33	68	67	17	11	11	7	10	9	Protein of unknown function wound-induced
TRIAE_CS42_2AL_TGACv1_095934_AA0315860	28	32	32	6	7	7	6	0	5	Leucine-rich repeat domain, L domain-like
TRIAE_CS42_2AL_TGACv1_095996_AA0316490	13	19	16	0	2	0	0	3	4	Aluminum-activated malate transporter
TRIAE_CS42_2AL_TGACv1_096807_AA0321470	16	21	12	1	5	4	7	1	2	#N/A
TRIAE_CS42_2AS_TGACv1_112078_AA0329720	33	15	13	2	5	3	0	1	1	Sulfotransferase domain
TRIAE_CS42_2AS_TGACv1_112464_AA0338550	19	21	26	3	2	2	2	4	4	Myc-type, basic helix-loop-helix (bHLH) domain
TRIAE_CS42_2AS_TGACv1_112491_AA0339150	64	49	64	5	5	7	0	1	0	#N/A
TRIAE_CS42_2AS_TGACv1_112491_AA0339200	5	13	8	1	2	0	0	0	0	Haem peroxidase, plant/fungal/bacterial
TRIAE_CS42_2AS_TGACv1_112570_AA0341380	29	24	17	1	1	5	2	6	1	P-loop containing nucleoside triphosphate hydrolase
TRIAE_CS42_2AS_TGACv1_112618_AA0342400	93	44	43	16	12	17	0	5	13	PAN/Apple domain
TRIAE_CS42_2AS_TGACv1_113028_AA0350050	29	86	43	3	8	4	1	1	0	#N/A
TRIAE_CS42_2AS_TGACv1_113184_AA0352740	17	18	32	9	1	6	5	5	2	Nucleotide-diphospho-sugar transferase
TRIAE_CS42_2AS_TGACv1_113204_AA0353050	335	414	265	93	32	106	19	46	36	Plant peroxidase
TRIAE_CS42_2AS_TGACv1_113240_AA0353400	77	63	78	7	11	7	0	1	0	Protein of unknown function DUF594
TRIAE_CS42_2AS_TGACv1_113398_AA0355530	26	11	17	1	1	4	1	0	0	Transferase
TRIAE_CS42_2AS_TGACv1_114183_AA0364730	16	16	11	5	0	0	0	3	2	Haem peroxidase
TRIAE_CS42_2AS_TGACv1_115279_AA0371790	45	48	50	9	8	6	4	7	2	Haem peroxidase, plant/fungal/bacterial
TRIAE_CS42_2BL_TGACv1_129452_AA0384410	93	65	53	10	1	8	3	21	16	Cytochrome P450
TRIAE_CS42_2BL_TGACv1_129470_AA0385160	238	97	240	24	23	43	26	26	16	Carbohydrate binding domain CBM49
TRIAE_CS42_2BL_TGACv1_129478_AA0385480	20	24	25	5	2	11	0	0	1	Cytochrome P450
TRIAE_CS42_2BL_TGACv1_129537_AA0387610	15	35	20	8	4	2	1	0	0	#N/A
TRIAE_CS42_2BL_TGACv1_129624_AA0390940	37	32	28	11	4	11	1	2	0	consensus disorder prediction
TRIAE_CS42_2BL_TGACv1_129644_AA0391500	102	157	84	38	12	12	30	21	19	consensus disorder prediction
TRIAE_CS42_2BL_TGACv1_129691_AA0392780	34	37	17	7	3	4	9	3	3	consensus disorder prediction
TRIAE_CS42_2BL_TGACv1_129815_AA0397060	17	15	11	2	4	3	1	1	0	Leucine-rich repeat domain, L domain-like
TRIAE_CS42_2BL_TGACv1_129974_AA0400790	69	64	74	14	20	19	1	3	1	consensus disorder prediction
TRIAE_CS42_2BL_TGACv1_130086_AA0403460	59	98	58	8	14	13	6	11	3	consensus disorder prediction
TRIAE_CS42_2BL_TGACv1_130133_AA0404620	30	29	19	6	5	4	5	1	2	#N/A
TRIAE_CS42_2BL_TGACv1_130225_AA0406700	85	56	46	17	5	8	5	7	13	#N/A
TRIAE_CS42_2BL_TGACv1_130416_AA0410900	42	8	45	1	3	6	1	1	0	#N/A
TRIAE_CS42_2BL_TGACv1_130665_AA0415560	234	123	250	59	39	43	11	5	26	Cytochrome P450
TRIAE_CS42_2BL_TGACv1_130715_AA0416520	16	13	11	5	1	2	2	2	1	#N/A
TRIAE_CS42_2BL_TGACv1_131206_AA0424420	33	59	53	5	15	3	6	11	4	Zinc finger, RING/FYVE/PHD-type
TRIAE_CS42_2BL_TGACv1_131244_AA0424920	273	310	282	91	63	70	8	8	12	ABC transporter-like
TRIAE_CS42_2BL_TGACv1_131246_AA0424960	14	23	10	0	5	2	0	1	1	Cytochrome P450
TRIAE_CS42_2BL_TGACv1_131340_AA0426340	111	117	113	35	20	18	3	2	6	#N/A
TRIAE_CS42_2BL_TGACv1_132027_AA0434630	32	57	15	5	3	5	1	3	2	Pyridoxal phosphate-dependent transferase, major region, subdomain 2
TRIAE_CS42_2BL_TGACv1_132289_AA0436540	21	12	37	3	4	5	2	3	5	Alpha/Beta hydrolase fold
TRIAE_CS42_2BL_TGACv1_132811_AA0439890	170	194	109	13	21	39	33	25	15	#N/A
TRIAE_CS42_2BL_TGACv1_132941_AA0440580	54	44	32	7	8	13	0	0	5	Protein of unknown function DUF594
TRIAE_CS42_2BL_TGACv1_727308_AA2170970	22	11	16	4	0	2	1	1	3	Cytochrome P450, conserved site
TRIAE_CS42_2BS_TGACv1_146114_AA0455550	39	17	46	14	6	8	4	4	3	Protein of unknown function DUF594
TRIAE_CS42_2BS_TGACv1_146129_AA0456070	201	139	219	54	15	23	4	11	7	Sulfotransferase domain
TRIAE_CS42_2BS_TGACv1_146129_AA0456090	202	210	258	70	25	38	24	57	36	P-loop containing nucleoside triphosphate hydrolase
TRIAE_CS42_2BS_TGACv1_146223_AA0459500	1235	787	1055	386	168	255	13	43	48	Protein of unknown function DUF594
TRIAE_CS42_2BS_TGACv1_146237_AA0459840	78	39	46	20	11	8	2	3	4	Ankyrin repeat-containing domain
TRIAE_CS42_2BS_TGACv1_146297_AA0461720	18	9	33	3	4	1	0	1	0	Cytochrome P450, E-class, group I
TRIAE_CS42_2BS_TGACv1_146421_AA0464720	59	27	66	15	3	11	5	5	3	Zinc finger, RING/FYVE/PHD-type
TRIAE_CS42_2BS_TGACv1_146481_AA0466080	87	55	68	19	12	12	7	11	14	Plant disease resistance response protein
TRIAE_CS42_2BS_TGACv1_146536_AA0467660	192	182	161	54	14	35	10	10	13	#N/A
TRIAE_CS42_2BS_TGACv1_146639_AA0469920	235	251	141	56	30	57	10	28	16	#N/A
TRIAE_CS42_2BS_TGACv1_146709_AA0471300	69	36	73	16	5	21	9	9	5	Haem peroxidase, plant/fungal/bacterial
TRIAE_CS42_2BS_TGACv1_147153_AA0478850	96	48	71	12	4	14	0	0	3	Late embryogenesis abundant protein, LEA-14
TRIAE_CS42_2BS_TGACv1_147450_AA0483280	25	31	9	2	3	2	2	2	1	Prokaryotic membrane lipoprotein lipid attachment site profile.
TRIAE_CS42_2BS_TGACv1_147557_AA0484840	121	108	120	26	26	35	17	13	19	P-loop containing nucleoside triphosphate hydrolase
TRIAE_CS42_2BS_TGACv1_148016_AA0489800	17	15	16	1	4	7	2	1	5	consensus disorder prediction
TRIAE_CS42_2BS_TGACv1_148103_AA0490610	216	144	198	52	38	46	25	40	47	#N/A
TRIAE_CS42_2BS_TGACv1_148216_AA0491410	119	138	109	26	22	29	13	11	8	Wax synthase domain
TRIAE_CS42_2BS_TGACv1_149143_AA0496390	52	23	47	3	1	13	9	7	9	Haem peroxidase, plant/fungal/bacterial
TRIAE_CS42_2BS_TGACv1_149754_AA0497570	190	118	175	24	14	37	6	13	1	#N/A
TRIAE_CS42_2DL_TGACv1_158017_AA0506150	61	30	80	15	4	9	2	4	1	#N/A
TRIAE_CS42_2DL_TGACv1_158079_AA0508190	61	42	88	9	10	19	6	13	8	Expansin, cellulose-binding-like domain
TRIAE_CS42_2DL_TGACv1_158100_AA0509100	10	17	8	3	3	2	0	0	1	consensus disorder prediction
TRIAE_CS42_2DL_TGACv1_158124_AA0509880	5	16	8	0	0	0	0	1	0	Domain of unknown function DUF4220
TRIAE_CS42_2DL_TGACv1_158297_AA0515060	30	13	24	6	3	3	8	5	1	Prokaryotic membrane lipoprotein lipid attachment site profile.
TRIAE_CS42_2DL_TGACv1_158411_AA0518040	22	15	15	7	3	3	1	0	8	FAS1 domain
TRIAE_CS42_2DL_TGACv1_158553_AA0521690	118	127	124	30	35	30	14	28	19	Pectinesterase inhibitor domain
TRIAE_CS42_2DL_TGACv1_158600_AA0522950	400	418	346	96	86	99	60	29	43	Cytochrome P450
TRIAE_CS42_2DL_TGACv1_158719_AA0524880	22	21	19	2	0	2	3	0	0	P-loop containing nucleoside triphosphate hydrolase
TRIAE_CS42_2DL_TGACv1_158728_AA0525020	22	37	43	1	0	0	0	2	1	Galactose-binding domain-like
TRIAE_CS42_2DL_TGACv1_159079_AA0531900	65	30	34	20	2	4	2	5	6	Serine/threonine-protein kinase, active site
TRIAE_CS42_2DL_TGACv1_159079_AA0531920	15	12	8	1	0	1	0	0	1	Serine/threonine-protein kinase, active site
TRIAE_CS42_2DL_TGACv1_159120_AA0532880	51	48	55	9	7	13	2	7	4	Protein of unknown function DUF247, plant
TRIAE_CS42_2DL_TGACv1_159136_AA0533100	54	62	21	18	9	7	5	7	3	consensus disorder prediction
TRIAE_CS42_2DL_TGACv1_159531_AA0539390	53	82	44	12	14	14	12	10	15	Zinc finger, Dof-type
TRIAE_CS42_2DL_TGACv1_160485_AA0551000	43	63	14	3	5	8	2	0	2	Gnk2-homologous domain
TRIAE_CS42_2DL_TGACv1_160694_AA0553210	526	295	411	166	60	110	75	68	69	#N/A
TRIAE_CS42_2DL_TGACv1_161136_AA0557000	511	773	541	165	137	138	103	44	36	Chloramphenicol acetyltransferase-like domain
TRIAE_CS42_2DS_TGACv1_177143_AA0566450	23	6	10	3	0	0	0	0	0	AP2/ERF domain
TRIAE_CS42_2DS_TGACv1_177196_AA0568440	29	27	36	12	3	9	5	10	5	#N/A
TRIAE_CS42_2DS_TGACv1_177198_AA0568560	72	94	118	20	18	35	8	25	21	SGNH hydrolase-type esterase domain
TRIAE_CS42_2DS_TGACv1_177201_AA0568830	30	29	42	3	8	5	0	1	0	Domain of unknown function DUF4220
TRIAE_CS42_2DS_TGACv1_177392_AA0575390	421	148	217	51	74	69	2	7	13	ABC transporter-like
TRIAE_CS42_2DS_TGACv1_177968_AA0588390	24	24	44	5	4	8	3	3	1	Nucleotide-diphospho-sugar transferase
TRIAE_CS42_2DS_TGACv1_178659_AA0599140	83	65	78	10	22	9	3	2	5	Haem peroxidase, plant/fungal/bacterial
TRIAE_CS42_2DS_TGACv1_178698_AA0599900	31	30	28	3	2	10	0	0	1	consensus disorder prediction
TRIAE_CS42_2DS_TGACv1_179218_AA0605300	224	274	188	23	37	25	34	29	24	#N/A
TRIAE_CS42_2DS_TGACv1_179391_AA0606740	18	23	23	5	4	3	1	2	0	Gnk2-homologous domain
TRIAE_CS42_3AL_TGACv1_193776_AA0619600	244	289	243	59	55	84	5	8	5	#N/A
TRIAE_CS42_3AL_TGACv1_193917_AA0622560	99	80	81	7	9	15	3	3	7	#N/A
TRIAE_CS42_3AL_TGACv1_194070_AA0625880	600	960	807	116	163	163	64	42	40	SANT
TRIAE_CS42_3AL_TGACv1_194533_AA0635220	92	58	58	31	8	10	15	10	6	S-adenosyl-L-methionine-dependent methyltransferase
TRIAE_CS42_3AL_TGACv1_195318_AA0647990	58	47	29	4	11	12	0	3	0	Thioredoxin-like fold
TRIAE_CS42_3AL_TGACv1_195717_AA0653040	186	157	125	16	34	24	10	10	5	Protein kinase-like domain
TRIAE_CS42_3AL_TGACv1_195891_AA0655330	47	66	27	5	6	12	3	1	2	Alpha/Beta hydrolase fold
TRIAE_CS42_3AL_TGACv1_197490_AA0666490	32	42	23	11	8	6	13	2	3	S-locus glycoprotein domain
TRIAE_CS42_3AS_TGACv1_210785_AA0678950	26	32	17	3	7	5	1	3	6	Cytochrome P450
TRIAE_CS42_3AS_TGACv1_210954_AA0682090	157	88	90	30	13	30	14	10	16	consensus disorder prediction
TRIAE_CS42_3AS_TGACv1_211115_AA0685290	30	25	28	6	6	4	0	3	2	#N/A
TRIAE_CS42_3AS_TGACv1_211797_AA0694260	37	15	25	7	5	3	0	0	0	Expansin, cellulose-binding-like domain
TRIAE_CS42_3AS_TGACv1_213051_AA0705020	23	22	16	5	6	3	2	2	4	#N/A
TRIAE_CS42_3AS_TGACv1_213270_AA0706310	22	10	18	3	3	3	0	5	4	Myc-type, basic helix-loop-helix (bHLH) domain
TRIAE_CS42_3B_TGACv1_220646_AA0713620	17	26	11	1	4	1	1	2	3	Myb domain
TRIAE_CS42_3B_TGACv1_220776_AA0718930	62	86	41	3	9	9	5	1	2	Alpha/Beta hydrolase fold
TRIAE_CS42_3B_TGACv1_220814_AA0720040	221	373	297	48	53	57	14	12	13	Homeodomain-like
TRIAE_CS42_3B_TGACv1_220915_AA0723560	69	69	31	15	3	11	0	7	9	Cytochrome P450
TRIAE_CS42_3B_TGACv1_220963_AA0725150	9	7	5	2	0	0	0	0	0	DVL
TRIAE_CS42_3B_TGACv1_221277_AA0735990	209	408	153	69	47	29	32	45	40	#N/A
TRIAE_CS42_3B_TGACv1_221332_AA0737520	24	25	17	5	2	9	3	4	3	Thioredoxin-like fold
TRIAE_CS42_3B_TGACv1_221406_AA0739940	79	66	55	26	2	15	7	4	3	Protein kinase-like domain
TRIAE_CS42_3B_TGACv1_221504_AA0742090	20	16	12	5	1	1	1	1	2	Protein kinase, ATP binding site
TRIAE_CS42_3B_TGACv1_221542_AA0743720	52	62	18	6	7	18	1	6	1	Ankyrin repeat-containing domain
TRIAE_CS42_3B_TGACv1_221719_AA0748260	60	58	48	12	8	21	3	14	4	#N/A
TRIAE_CS42_3B_TGACv1_221921_AA0753160	28	17	36	2	2	8	4	7	1	Cathepsin propeptide inhibitor domain (I29)
TRIAE_CS42_3B_TGACv1_221987_AA0754590	72	54	51	15	8	14	3	6	6	Protein kinase-like domain
TRIAE_CS42_3B_TGACv1_222171_AA0758880	80	113	61	25	18	17	9	6	10	#N/A
TRIAE_CS42_3B_TGACv1_222297_AA0761560	80	138	88	11	29	16	6	7	4	Cytochrome b561/ferric reductase transmembrane
TRIAE_CS42_3B_TGACv1_222612_AA0767810	363	457	288	57	86	85	48	28	25	PTR2 family proton/oligopeptide symporter, conserved site
TRIAE_CS42_3B_TGACv1_222870_AA0772100	22	16	37	6	2	7	2	3	0	#N/A
TRIAE_CS42_3B_TGACv1_223603_AA0784420	28	22	31	7	4	5	4	3	2	Pollen proteins Ole e I like
TRIAE_CS42_3B_TGACv1_223731_AA0786350	23	32	15	5	3	7	4	4	0	Ovate protein family, C-terminal
TRIAE_CS42_3B_TGACv1_223765_AA0786860	17	19	22	0	0	4	0	1	2	#N/A
TRIAE_CS42_3B_TGACv1_224677_AA0799850	212	364	195	82	47	42	38	42	45	#N/A
TRIAE_CS42_3B_TGACv1_224701_AA0800190	202	365	144	65	35	41	38	40	45	#N/A
TRIAE_CS42_3B_TGACv1_227313_AA0822740	34	18	18	3	2	10	2	3	9	consensus disorder prediction
TRIAE_CS42_3B_TGACv1_227482_AA0823520	608	1086	243	155	66	120	69	51	79	Cytochrome P450, E-class, group I
TRIAE_CS42_3B_TGACv1_227709_AA0824430	111	217	105	29	30	35	20	23	12	#N/A
TRIAE_CS42_3B_TGACv1_229413_AA0828660	140	208	167	48	22	33	38	16	17	Protein of unknown function DUF247, plant
TRIAE_CS42_3DL_TGACv1_249418_AA0848250	191	202	175	31	45	33	2	3	2	#N/A
TRIAE_CS42_3DL_TGACv1_249562_AA0851530	92	141	101	23	36	24	6	8	10	Cytochrome b561/ferric reductase transmembrane
TRIAE_CS42_3DL_TGACv1_249723_AA0855230	41	27	53	10	6	16	6	1	14	Transferase
TRIAE_CS42_3DL_TGACv1_249919_AA0858550	434	650	134	61	15	63	46	29	30	Cytochrome P450
TRIAE_CS42_3DL_TGACv1_250863_AA0874320	22	23	21	3	2	1	2	0	0	P-loop containing nucleoside triphosphate hydrolase
TRIAE_CS42_3DL_TGACv1_250912_AA0874930	401	588	325	76	62	72	22	38	41	Heavy metal-associated domain, HMA
TRIAE_CS42_3DL_TGACv1_251131_AA0877870	295	137	267	36	48	52	16	33	25	consensus disorder prediction
TRIAE_CS42_3DL_TGACv1_251940_AA0886170	86	138	67	34	20	21	4	2	7	Zinc finger, RING/FYVE/PHD-type
TRIAE_CS42_3DL_TGACv1_252375_AA0889690	236	423	286	19	30	36	55	28	28	Homeodomain-like
TRIAE_CS42_3DL_TGACv1_252997_AA0892910	13	8	12	1	0	0	0	0	0	consensus disorder prediction
TRIAE_CS42_3DS_TGACv1_271533_AA0901450	101	42	118	28	26	13	7	23	19	#N/A
TRIAE_CS42_3DS_TGACv1_271533_AA0901490	21	5	21	1	3	2	0	2	1	#N/A
TRIAE_CS42_3DS_TGACv1_271584_AA0903040	63	55	68	3	7	19	3	7	5	Disease resistance protein signature
TRIAE_CS42_3DS_TGACv1_271933_AA0911320	113	169	70	27	16	22	9	15	14	#N/A
TRIAE_CS42_3DS_TGACv1_271978_AA0912230	253	219	177	63	24	67	26	20	24	Leucine-rich repeat
TRIAE_CS42_3DS_TGACv1_272073_AA0914230	76	91	108	17	5	23	17	7	11	#N/A
TRIAE_CS42_3DS_TGACv1_272103_AA0914830	27	24	40	2	3	6	0	0	4	Protein of unknown function DUF594
TRIAE_CS42_3DS_TGACv1_272537_AA0922020	35	23	39	8	2	12	1	1	1	Ribonuclease H-like domain
TRIAE_CS42_3DS_TGACv1_272592_AA0922770	18	12	17	6	0	5	0	2	0	Oxoglutarate/iron-dependent dioxygenase
TRIAE_CS42_3DS_TGACv1_272888_AA0926170	21	26	23	9	2	2	3	0	2	consensus disorder prediction
TRIAE_CS42_3DS_TGACv1_274013_AA0934360	86	103	44	35	10	16	0	0	0	Homeodomain-like
TRIAE_CS42_3DS_TGACv1_274214_AA0935080	35	35	33	5	5	6	4	3	3	Zinc finger, DHHC-type, palmitoyltransferase
TRIAE_CS42_3DS_TGACv1_274299_AA0935350	26	22	29	4	3	7	0	2	2	Protein of unknown function DUF3339
TRIAE_CS42_4AL_TGACv1_288347_AA0945660	770	723	472	124	106	85	103	91	98	consensus disorder prediction
TRIAE_CS42_4AL_TGACv1_288409_AA0948190	28	27	23	5	1	7	1	4	4	consensus disorder prediction
TRIAE_CS42_4AL_TGACv1_288496_AA0950170	120	115	170	26	34	19	21	26	37	Glycoside hydrolase family 3 C-terminal domain
TRIAE_CS42_4AL_TGACv1_288580_AA0952620	42	20	39	3	3	8	3	3	8	Expansin, cellulose-binding-like domain
TRIAE_CS42_4AL_TGACv1_288645_AA0954420	22	13	26	8	5	3	3	4	0	Calreticulin/calnexin
TRIAE_CS42_4AL_TGACv1_289183_AA0966750	105	39	110	11	10	11	8	7	5	LbR_Ice_bind
TRIAE_CS42_4AL_TGACv1_289183_AA0966760	40	39	40	8	6	11	7	2	5	Leucine-rich repeat signature
TRIAE_CS42_4AL_TGACv1_289423_AA0970820	5401	2753	3864	2011	264	1109	208	788	1096	Potassium transporter
TRIAE_CS42_4AL_TGACv1_289710_AA0975760	21	20	18	5	3	4	5	1	3	#N/A
TRIAE_CS42_4AL_TGACv1_289712_AA0975830	128	116	130	13	13	29	10	26	36	RlpA-like protein, double-psi beta-barrel domain
TRIAE_CS42_4AL_TGACv1_290746_AA0988870	50	52	21	9	5	6	7	5	2	#N/A
TRIAE_CS42_4AL_TGACv1_290760_AA0989060	115	32	38	9	3	2	1	7	2	Major facilitator superfamily domain
TRIAE_CS42_4AL_TGACv1_290937_AA0990730	843	978	639	201	217	210	41	41	33	consensus disorder prediction
TRIAE_CS42_4AL_TGACv1_290947_AA0990870	30	19	15	7	3	3	2	0	0	UDP-glucuronosyl/UDP-glucosyltransferase
TRIAE_CS42_4AL_TGACv1_291545_AA0995290	63	44	53	17	2	7	4	6	8	#N/A
TRIAE_CS42_4AS_TGACv1_306221_AA1004560	23	28	30	2	2	4	1	0	0	#N/A
TRIAE_CS42_4AS_TGACv1_306553_AA1010090	39	79	49	15	10	5	9	1	5	#N/A
TRIAE_CS42_4BL_TGACv1_320302_AA1034400	268	112	110	27	1	15	3	6	10	Major facilitator superfamily domain
TRIAE_CS42_4BL_TGACv1_320705_AA1046720	48	28	39	10	3	7	2	8	5	Pyridoxal phosphate-dependent transferase, major region, subdomain 2
TRIAE_CS42_4BL_TGACv1_320969_AA1052810	341	452	440	117	65	116	64	28	36	DNA-binding domain
TRIAE_CS42_4BL_TGACv1_321261_AA1058110	23	24	13	7	3	5	0	3	6	#N/A
TRIAE_CS42_4BL_TGACv1_321685_AA1064100	6431	4159	4330	1806	330	1254	239	568	690	Potassium transporter
TRIAE_CS42_4BS_TGACv1_327817_AA1074900	397	729	275	101	52	116	91	90	43	Leucine-rich repeat domain, L domain-like
TRIAE_CS42_4BS_TGACv1_328270_AA1085430	47	40	48	5	9	8	3	5	6	Myc-type, basic helix-loop-helix (bHLH) domain
TRIAE_CS42_4BS_TGACv1_328313_AA1086130	81	76	50	5	5	8	4	4	5	Protein kinase-like domain
TRIAE_CS42_4BS_TGACv1_328522_AA1089370	23	16	29	7	3	8	2	4	3	Tyrosine-protein kinase, catalytic domain
TRIAE_CS42_4BS_TGACv1_328596_AA1090760	15	18	17	3	2	5	1	2	0	#N/A
TRIAE_CS42_4BS_TGACv1_328596_AA1090800	137	136	124	34	17	24	30	11	21	Isopenicillin N synthase-like
TRIAE_CS42_4BS_TGACv1_328640_AA1091510	12	8	20	5	1	2	2	0	4	Protein of unknown function DUF241, plant
TRIAE_CS42_4BS_TGACv1_329461_AA1101630	1638	992	1175	479	82	286	91	355	337	Isopenicillin N synthase-like
TRIAE_CS42_4BS_TGACv1_340112_AA1111360	19	12	25	8	5	0	5	4	0	#N/A
TRIAE_CS42_4DL_TGACv1_342519_AA1115680	56	41	88	11	18	17	1	4	2	Concanavalin A-like lectin/glucanase domain
TRIAE_CS42_4DL_TGACv1_342567_AA1116800	14	5	18	0	3	2	1	0	2	#N/A
TRIAE_CS42_4DL_TGACv1_342600_AA1117520	321	333	275	111	54	86	47	32	30	Cytochrome P450
TRIAE_CS42_4DL_TGACv1_342800_AA1122450	19	21	15	4	1	2	0	1	0	Major facilitator superfamily domain
TRIAE_CS42_4DL_TGACv1_342852_AA1123790	110	62	54	33	3	27	2	15	18	consensus disorder prediction
TRIAE_CS42_4DL_TGACv1_343255_AA1132260	25	24	12	1	1	3	1	1	0	#N/A
TRIAE_CS42_4DL_TGACv1_343636_AA1137540	3574	1185	2409	1197	180	617	115	344	346	Potassium transporter
TRIAE_CS42_4DL_TGACv1_343895_AA1141150	33	14	46	2	2	4	7	4	2	#N/A
TRIAE_CS42_4DL_TGACv1_344639_AA1148630	16	21	30	8	3	2	3	1	1	#N/A
TRIAE_CS42_4DL_TGACv1_345164_AA1151960	16	13	7	3	0	1	0	2	0	Zinc finger, RING-type
TRIAE_CS42_4DS_TGACv1_361029_AA1159200	604	727	410	219	64	154	78	94	94	Leucine-rich repeat-containing N-terminal, plant-type
TRIAE_CS42_4DS_TGACv1_361334_AA1165960	154	99	169	31	45	28	8	15	11	consensus disorder prediction
TRIAE_CS42_4DS_TGACv1_361561_AA1170170	16	4	12	2	0	3	1	1	0	consensus disorder prediction
TRIAE_CS42_4DS_TGACv1_362070_AA1176380	8	14	22	2	5	0	2	1	2	Lateral organ boundaries, LOB
TRIAE_CS42_4DS_TGACv1_362222_AA1177850	28	25	50	1	1	8	1	7	4	Glycoside hydrolase superfamily
TRIAE_CS42_4DS_TGACv1_362233_AA1178000	25	32	34	13	2	8	10	1	6	Cytochrome P450, E-class, group I
TRIAE_CS42_4DS_TGACv1_362883_AA1182570	22	10	29	4	3	8	1	5	4	consensus disorder prediction
TRIAE_CS42_5AL_TGACv1_374102_AA1190440	56	48	41	3	8	5	14	6	3	Zinc finger, RING-type
TRIAE_CS42_5AL_TGACv1_374111_AA1190680	587	544	541	140	38	92	90	113	112	Small auxin-up RNA
TRIAE_CS42_5AL_TGACv1_374111_AA1190690	31	26	25	5	3	1	1	4	1	Small auxin-up RNA
TRIAE_CS42_5AL_TGACv1_374111_AA1190700	1219	1002	828	262	95	160	145	158	173	Small auxin-up RNA
TRIAE_CS42_5AL_TGACv1_374111_AA1190720	1133	868	890	358	104	261	162	186	216	Small auxin-up RNA
TRIAE_CS42_5AL_TGACv1_374191_AA1193100	47	79	55	17	13	16	2	1	1	Nucleotide-diphospho-sugar transferases
TRIAE_CS42_5AL_TGACv1_374413_AA1199550	116	96	87	45	12	21	6	19	21	Leucine-rich repeat domain, L domain-like
TRIAE_CS42_5AL_TGACv1_374630_AA1204890	49	39	43	7	6	11	2	3	3	Prokaryotic membrane lipoprotein lipid attachment site profile.
TRIAE_CS42_5AL_TGACv1_374750_AA1208130	108	134	112	19	23	27	13	25	23	Late embryogenesis abundant protein, LEA-14
TRIAE_CS42_5AL_TGACv1_374914_AA1211800	225	207	184	27	10	48	10	6	15	Gnk2-homologous domain
TRIAE_CS42_5AL_TGACv1_374914_AA1211810	343	278	251	81	30	64	31	10	22	Protein kinase domain
TRIAE_CS42_5AL_TGACv1_374931_AA1212310	83	92	97	11	18	21	0	0	1	Amino acid/polyamine transporter I
TRIAE_CS42_5AL_TGACv1_374948_AA1212610	23	17	9	3	0	2	1	5	3	Reverse transcriptase zinc-binding domain
TRIAE_CS42_5AL_TGACv1_375027_AA1214290	674	798	418	92	122	93	37	43	38	Zf-FLZ domain
TRIAE_CS42_5AL_TGACv1_375132_AA1216620	15	31	14	0	2	0	0	0	0	DNA-binding domain
TRIAE_CS42_5AL_TGACv1_375361_AA1220440	51	50	98	19	10	23	2	4	0	Cytochrome P450
TRIAE_CS42_5AL_TGACv1_375472_AA1222340	19	33	11	4	2	8	2	3	0	AP2/ERF domain
TRIAE_CS42_5AL_TGACv1_376502_AA1237720	115	82	47	23	10	9	6	9	14	Glycolipid transfer protein domain
TRIAE_CS42_5AL_TGACv1_376873_AA1241900	28	22	18	2	0	1	2	1	0	#N/A
TRIAE_CS42_5AL_TGACv1_377016_AA1243230	36	57	32	6	0	6	3	2	1	consensus disorder prediction
TRIAE_CS42_5AL_TGACv1_378145_AA1251520	16	5	17	3	0	1	0	2	1	Ribosomal protein S16 domain
TRIAE_CS42_5AL_TGACv1_379359_AA1256190	35	44	26	8	6	9	3	4	3	#N/A
TRIAE_CS42_5AS_TGACv1_394198_AA1278680	123	269	107	13	17	24	5	4	1	Serine/threonine-protein kinase, active site
TRIAE_CS42_5AS_TGACv1_394239_AA1279100	6	3	9	0	0	1	0	0	0	Transcription factor, MADS-box
TRIAE_CS42_5BL_TGACv1_404183_AA1288770	13	11	13	0	0	0	0	0	0	AP2/ERF domain
TRIAE_CS42_5BL_TGACv1_404237_AA1291710	16	17	7	1	2	2	0	0	1	DNA-binding domain
TRIAE_CS42_5BL_TGACv1_404293_AA1294240	53	54	44	8	11	18	1	10	6	Expansin/Lol pI
TRIAE_CS42_5BL_TGACv1_404407_AA1298720	57	111	42	20	10	19	3	3	1	Xylanase inhibitor, N-terminal
TRIAE_CS42_5BL_TGACv1_404422_AA1299410	17	27	13	9	3	1	0	0	0	AP2/ERF domain
TRIAE_CS42_5BL_TGACv1_404519_AA1302750	36	11	45	1	8	4	0	0	1	Tobacco mosaic virus-like, coat protein
TRIAE_CS42_5BL_TGACv1_404990_AA1317200	129	76	70	32	8	21	1	6	12	Small auxin-up RNA
TRIAE_CS42_5BL_TGACv1_404990_AA1317210	353	192	282	74	11	37	16	21	35	Small auxin-up RNA
TRIAE_CS42_5BL_TGACv1_404990_AA1317250	334	189	224	102	27	78	14	37	30	Small auxin-up RNA
TRIAE_CS42_5BL_TGACv1_404990_AA1317260	797	706	561	117	51	96	71	77	80	Small auxin-up RNA
TRIAE_CS42_5BL_TGACv1_405270_AA1323630	38	31	29	0	5	2	0	1	1	Expansin, cellulose-binding-like domain
TRIAE_CS42_5BL_TGACv1_405292_AA1324180	141	210	135	31	45	40	18	49	22	#N/A
TRIAE_CS42_5BL_TGACv1_405370_AA1325990	345	130	202	25	12	22	18	23	45	Ammonium/urea transporter
TRIAE_CS42_5BL_TGACv1_405520_AA1329310	1085	995	908	342	102	187	152	157	175	#N/A
TRIAE_CS42_5BL_TGACv1_406061_AA1340050	41	54	51	14	8	3	11	2	2	AP2/ERF domain
TRIAE_CS42_5BL_TGACv1_406240_AA1342700	60	38	45	11	4	4	8	7	11	Flavin monooxygenase-like
TRIAE_CS42_5BL_TGACv1_406313_AA1343910	12	7	16	3	1	2	1	2	1	Calreticulin/calnexin, P domain
TRIAE_CS42_5BL_TGACv1_406891_AA1351220	611	774	385	114	107	59	69	77	62	#N/A
TRIAE_CS42_5BL_TGACv1_408285_AA1362600	59	22	72	4	11	6	0	2	0	Plant peroxidase
TRIAE_CS42_5BL_TGACv1_409916_AA1366600	15	11	9	0	0	0	0	3	1	Nucleotide-diphospho-sugar transferases
TRIAE_CS42_5BL_TGACv1_412119_AA1367740	54	31	61	9	7	5	11	11	1	Histone H2A, C-terminal domain
TRIAE_CS42_5BS_TGACv1_423221_AA1371420	162	155	112	43	10	35	5	3	7	Cytochrome P450
TRIAE_CS42_5BS_TGACv1_423610_AA1380580	16	22	14	3	2	3	0	3	2	Disease resistance protein signature
TRIAE_CS42_5BS_TGACv1_424218_AA1387660	49	49	71	16	16	11	2	1	5	consensus disorder prediction
TRIAE_CS42_5DL_TGACv1_432912_AA1393960	216	268	154	49	29	35	23	16	15	Protein kinase domain
TRIAE_CS42_5DL_TGACv1_432950_AA1395800	7	11	11	2	1	1	0	0	1	Protein of unknown function DUF594
TRIAE_CS42_5DL_TGACv1_433013_AA1398140	9	21	18	1	3	0	4	0	3	AP2/ERF domain
TRIAE_CS42_5DL_TGACv1_433013_AA1398160	37	25	25	4	2	2	0	3	1	AP2/ERF domain
TRIAE_CS42_5DL_TGACv1_433013_AA1398170	105	177	97	24	12	18	13	9	12	consensus disorder prediction
TRIAE_CS42_5DL_TGACv1_433034_AA1399060	190	270	154	46	55	23	18	11	15	F-box domain
TRIAE_CS42_5DL_TGACv1_433102_AA1402060	25	41	31	12	5	8	1	1	0	P-loop containing nucleoside triphosphate hydrolase
TRIAE_CS42_5DL_TGACv1_433226_AA1406230	84	115	120	17	20	36	35	10	8	Chloramphenicol acetyltransferase-like domain
TRIAE_CS42_5DL_TGACv1_433228_AA1406320	19	17	20	3	4	5	3	3	2	Leucine-rich repeat domain, L domain-like
TRIAE_CS42_5DL_TGACv1_433263_AA1407500	14	25	15	8	2	2	2	0	0	AP2/ERF domain
TRIAE_CS42_5DL_TGACv1_433263_AA1407520	27	18	26	2	2	3	0	0	0	consensus disorder prediction
TRIAE_CS42_5DL_TGACv1_433462_AA1413750	448	346	418	129	51	83	21	65	99	Small auxin-up RNA
TRIAE_CS42_5DL_TGACv1_433462_AA1413760	43	37	24	7	5	5	1	3	1	Small auxin-up RNA
TRIAE_CS42_5DL_TGACv1_433519_AA1415440	20	33	33	3	5	8	1	2	2	AP2/ERF domain
TRIAE_CS42_5DL_TGACv1_433534_AA1415760	42	33	91	10	9	10	2	9	3	Cytochrome P450
TRIAE_CS42_5DL_TGACv1_433714_AA1420300	145	158	180	42	24	42	16	25	19	RlpA-like protein, double-psi beta-barrel domain
TRIAE_CS42_5DL_TGACv1_433740_AA1420990	111	129	69	25	25	16	18	23	16	#N/A
TRIAE_CS42_5DL_TGACv1_433757_AA1421380	14	25	14	1	5	3	2	1	1	#N/A
TRIAE_CS42_5DL_TGACv1_434021_AA1427370	63	70	34	14	7	5	8	11	1	#N/A
TRIAE_CS42_5DL_TGACv1_434221_AA1432040	319	211	220	49	53	67	39	27	36	AP2/ERF domain
TRIAE_CS42_5DL_TGACv1_434235_AA1432270	172	122	121	65	17	26	48	6	15	Protein kinase domain
TRIAE_CS42_5DL_TGACv1_434954_AA1444060	96	76	139	30	21	22	3	12	8	Zinc finger, RING-type
TRIAE_CS42_5DL_TGACv1_435281_AA1448380	21	22	10	6	2	2	1	2	3	consensus disorder prediction
TRIAE_CS42_5DL_TGACv1_435356_AA1449460	81	21	85	3	6	19	5	1	2	Haem peroxidase, plant/fungal/bacterial
TRIAE_CS42_5DL_TGACv1_435586_AA1452390	101	74	106	31	10	18	10	18	25	Prokaryotic membrane lipoprotein lipid attachment site profile.
TRIAE_CS42_5DL_TGACv1_436104_AA1458060	21	9	18	2	1	1	2	3	2	#N/A
TRIAE_CS42_5DL_TGACv1_436444_AA1461040	111	151	93	5	19	12	16	31	25	Late embryogenesis abundant protein, LEA-14
TRIAE_CS42_5DL_TGACv1_437498_AA1466410	38	23	21	6	3	7	0	1	3	P-loop containing nucleoside triphosphate hydrolase
TRIAE_CS42_5DS_TGACv1_456541_AA1473570	135	163	110	41	31	19	8	8	7	Cytochrome P450, conserved site
TRIAE_CS42_5DS_TGACv1_456689_AA1476260	97	89	92	18	20	26	2	11	8	Leucine-rich repeat domain, L domain-like
TRIAE_CS42_5DS_TGACv1_458105_AA1492060	80	86	148	18	32	24	1	0	2	consensus disorder prediction
TRIAE_CS42_6AL_TGACv1_470871_AA1497330	43	48	17	4	6	5	1	5	9	#N/A
TRIAE_CS42_6AL_TGACv1_470891_AA1497860	8	8	8	1	0	0	0	0	0	consensus disorder prediction
TRIAE_CS42_6AL_TGACv1_470955_AA1499380	195	147	223	34	47	29	4	9	8	#N/A
TRIAE_CS42_6AL_TGACv1_471103_AA1502940	157	101	218	36	30	57	25	23	18	Peroxidases heam-ligand binding site
TRIAE_CS42_6AL_TGACv1_471764_AA1514000	21	9	26	2	5	5	0	1	4	Concanavalin A-like lectin/glucanase domain
TRIAE_CS42_6AL_TGACv1_473099_AA1528640	651	491	439	171	71	147	59	108	141	Protein kinase, ATP binding site
TRIAE_CS42_6AL_TGACv1_473175_AA1529250	111	111	82	31	12	20	23	17	18	Alpha/Beta hydrolase fold
TRIAE_CS42_6AL_TGACv1_473330_AA1530250	136	197	125	75	16	27	19	30	12	consensus disorder prediction
TRIAE_CS42_6AS_TGACv1_485520_AA1546830	109	106	119	25	18	13	12	32	13	#N/A
TRIAE_CS42_6AS_TGACv1_485637_AA1549280	192	266	181	10	6	12	27	30	38	ATP-dependent protease La (LON), substrate-binding domain
TRIAE_CS42_6AS_TGACv1_485722_AA1550780	219	131	177	35	15	26	16	25	42	Leucine rich repeat 4
TRIAE_CS42_6AS_TGACv1_485824_AA1552810	259	314	345	46	94	69	26	35	25	consensus disorder prediction
TRIAE_CS42_6AS_TGACv1_487556_AA1571480	140	167	148	46	9	29	26	15	18	#N/A
TRIAE_CS42_6BL_TGACv1_499375_AA1580140	10	8	2	0	0	0	0	0	0	Leucine-rich repeat domain, L domain-like
TRIAE_CS42_6BL_TGACv1_499393_AA1581140	63	46	63	4	4	8	7	16	11	EF-hand domain pair
TRIAE_CS42_6BL_TGACv1_499697_AA1589410	60	36	29	9	6	12	2	2	6	#N/A
TRIAE_CS42_6BL_TGACv1_501524_AA1618400	32	16	21	8	2	3	4	3	5	SGNH hydrolase-type esterase domain
TRIAE_CS42_6BL_TGACv1_502086_AA1622990	25	25	10	3	2	6	1	1	0	Leucine-rich repeat domain, L domain-like
TRIAE_CS42_6BL_TGACv1_502922_AA1626700	93	80	79	42	6	19	4	10	10	#N/A
TRIAE_CS42_6BS_TGACv1_513143_AA1631860	13	23	12	3	2	1	3	2	2	Cytochrome P450, conserved site
TRIAE_CS42_6BS_TGACv1_513690_AA1647370	71	83	71	1	4	12	7	13	23	ATP-dependent protease La (LON), substrate-binding domain
TRIAE_CS42_6BS_TGACv1_513763_AA1648870	77	67	181	24	2	24	0	1	3	Major facilitator superfamily
TRIAE_CS42_6BS_TGACv1_513763_AA1648880	142	72	152	17	6	11	0	9	19	Major facilitator superfamily domain
TRIAE_CS42_6BS_TGACv1_514321_AA1658340	47	25	34	5	4	3	0	0	0	Protein of unknown function DUF247, plant
TRIAE_CS42_6BS_TGACv1_514503_AA1660660	128	115	66	25	17	31	20	11	11	Galactose oxidase/kelch, beta-propeller
TRIAE_CS42_6BS_TGACv1_514827_AA1664770	19	27	20	1	2	5	0	2	2	Chlorophyll a/b binding protein domain
TRIAE_CS42_6BS_TGACv1_516198_AA1674330	51	50	34	18	7	9	3	1	4	#N/A
TRIAE_CS42_6DL_TGACv1_526416_AA1682830	197	243	215	66	45	62	44	14	23	Gnk2-homologous domain
TRIAE_CS42_6DL_TGACv1_526842_AA1693190	96	52	154	18	6	17	12	10	12	Major facilitator superfamily domain
TRIAE_CS42_6DL_TGACv1_526930_AA1695360	70	56	72	15	6	9	4	2	2	Protein kinase domain
TRIAE_CS42_6DS_TGACv1_542665_AA1726840	109	73	58	29	10	26	12	10	25	Protein kinase domain
TRIAE_CS42_6DS_TGACv1_542688_AA1727710	109	119	71	42	14	23	7	5	9	P-loop containing nucleoside triphosphate hydrolase
TRIAE_CS42_6DS_TGACv1_542951_AA1733140	190	178	130	46	35	35	32	14	14	#N/A
TRIAE_CS42_6DS_TGACv1_543122_AA1735770	46	58	40	16	8	9	15	7	8	#N/A
TRIAE_CS42_7AL_TGACv1_556001_AA1752110	26	27	13	2	6	1	1	4	2	consensus disorder prediction
TRIAE_CS42_7AL_TGACv1_556337_AA1761200	59	81	39	13	9	11	21	3	6	Small auxin-up RNA
TRIAE_CS42_7AL_TGACv1_556497_AA1764130	236	167	183	38	8	17	9	11	15	Cation transporter
TRIAE_CS42_7AL_TGACv1_556503_AA1764280	56	39	28	11	10	4	1	2	0	Ankyrin repeat-containing domain
TRIAE_CS42_7AL_TGACv1_556707_AA1769420	147	95	114	11	19	21	5	9	12	#N/A
TRIAE_CS42_7AL_TGACv1_556785_AA1770740	22	32	29	12	4	7	3	1	3	consensus disorder prediction
TRIAE_CS42_7AL_TGACv1_556856_AA1772170	163	333	151	79	25	51	17	15	30	Expansin, cellulose-binding-like domain
TRIAE_CS42_7AL_TGACv1_557075_AA1776090	194	105	216	43	43	42	11	7	9	Glycoside hydrolase family 16
TRIAE_CS42_7AL_TGACv1_557464_AA1781650	340	297	251	87	47	71	43	41	41	#N/A
TRIAE_CS42_7AL_TGACv1_557511_AA1782360	35	84	52	10	13	13	19	8	8	consensus disorder prediction
TRIAE_CS42_7AL_TGACv1_557519_AA1782440	45	39	24	5	8	11	1	10	8	Proteolipid membrane potential modulator
TRIAE_CS42_7AL_TGACv1_557747_AA1785560	104	234	91	22	14	12	16	1	4	Small auxin-up RNA
TRIAE_CS42_7AL_TGACv1_557847_AA1787020	17	10	19	3	6	1	0	1	6	Cytochrome P450, conserved site
TRIAE_CS42_7AL_TGACv1_558293_AA1792060	182	212	173	30	21	37	4	2	2	consensus disorder prediction
TRIAE_CS42_7AL_TGACv1_558334_AA1792500	37	56	30	7	6	6	1	0	0	Expansin, cellulose-binding-like domain
TRIAE_CS42_7AL_TGACv1_558402_AA1793140	49	41	66	17	5	13	5	1	0	Protein of unknown function DUF247, plant
TRIAE_CS42_7AL_TGACv1_558473_AA1793650	114	223	108	42	16	33	12	5	13	Expansin, cellulose-binding-like domain
TRIAE_CS42_7AL_TGACv1_558911_AA1796870	49	69	22	11	8	10	9	6	1	#N/A
TRIAE_CS42_7AL_TGACv1_558959_AA1797160	123	158	106	18	11	13	17	6	19	#N/A
TRIAE_CS42_7AL_TGACv1_558970_AA1797200	944	955	829	150	225	174	11	24	9	Peroxidase, active site
TRIAE_CS42_7AL_TGACv1_558993_AA1797370	672	543	804	144	124	192	13	30	22	Plant peroxidase
TRIAE_CS42_7AL_TGACv1_559253_AA1798860	47	18	26	13	0	4	1	0	7	Plant disease resistance response protein
TRIAE_CS42_7AL_TGACv1_559613_AA1800300	244	504	137	53	25	37	11	20	18	Hydrophobic seed protein
TRIAE_CS42_7AS_TGACv1_569064_AA1806110	11	7	13	1	4	1	1	0	0	Chlorophyll A-B binding protein
TRIAE_CS42_7AS_TGACv1_569130_AA1808230	13	12	12	1	1	2	0	3	2	Protein of unknown function DUF241, plant
TRIAE_CS42_7AS_TGACv1_569409_AA1815100	146	170	99	34	26	26	8	11	8	consensus disorder prediction
TRIAE_CS42_7AS_TGACv1_569534_AA1818370	50	50	49	6	11	11	4	6	13	Protein of unknown function DUF247, plant
TRIAE_CS42_7AS_TGACv1_569844_AA1825100	38	16	28	8	1	3	0	1	0	B3 DNA binding domain
TRIAE_CS42_7AS_TGACv1_569889_AA1826350	17	35	36	8	5	7	7	6	6	consensus disorder prediction
TRIAE_CS42_7AS_TGACv1_569938_AA1827220	71	88	55	13	3	31	11	14	9	Protein of unknown function DUF617, plant
TRIAE_CS42_7AS_TGACv1_569995_AA1828380	8	9	15	0	2	0	1	0	0	Expansin, cellulose-binding-like domain
TRIAE_CS42_7AS_TGACv1_570084_AA1829950	89	65	31	21	7	14	10	15	7	Legume lectin, beta chain, Mn/Ca-binding site
TRIAE_CS42_7AS_TGACv1_570528_AA1837110	53	40	42	7	3	4	1	2	0	Glutathione S-transferase, N-terminal
TRIAE_CS42_7AS_TGACv1_570528_AA1837120	71	57	43	7	2	6	0	4	4	Glutathione S-transferase, C-terminal-like
TRIAE_CS42_7AS_TGACv1_570997_AA1843490	10	21	12	3	2	1	2	2	1	#N/A
TRIAE_CS42_7AS_TGACv1_571457_AA1847820	23	23	21	7	4	3	0	1	3	homeodomain
TRIAE_CS42_7BL_TGACv1_576846_AA1857220	34	78	107	5	10	13	12	14	15	Small auxin-up RNA
TRIAE_CS42_7BL_TGACv1_576895_AA1858970	47	47	35	5	4	0	1	3	0	Small auxin-up RNA
TRIAE_CS42_7BL_TGACv1_576986_AA1861960	65	75	80	26	15	18	11	14	16	#N/A
TRIAE_CS42_7BL_TGACv1_577032_AA1863340	883	602	1035	223	159	222	9	10	8	Phospholipase D/Transphosphatidylase
TRIAE_CS42_7BL_TGACv1_577283_AA1871300	615	476	554	94	137	174	1	11	7	Peroxidases heam-ligand binding site
TRIAE_CS42_7BL_TGACv1_577356_AA1873290	26	26	11	4	3	8	0	1	2	consensus disorder prediction
TRIAE_CS42_7BL_TGACv1_577434_AA1875370	19	39	24	5	3	1	1	2	0	Expansin/pollen allergen, DPBB domain
TRIAE_CS42_7BL_TGACv1_577569_AA1878740	415	447	288	112	68	101	11	14	27	bZIP_plant_BZIP46
TRIAE_CS42_7BL_TGACv1_577982_AA1887220	34	44	39	5	1	8	5	6	4	#N/A
TRIAE_CS42_7BL_TGACv1_578158_AA1890360	31	28	13	8	0	5	4	0	0	#N/A
TRIAE_CS42_7BL_TGACv1_578202_AA1891050	2858	1958	2231	1158	147	664	324	279	407	Cation transporter
TRIAE_CS42_7BL_TGACv1_578372_AA1893700	19	23	15	11	2	1	1	0	0	Cytochrome P450, conserved site
TRIAE_CS42_7BL_TGACv1_578867_AA1901180	237	388	261	55	39	62	87	54	48	Small auxin-up RNA
TRIAE_CS42_7BL_TGACv1_579235_AA1905600	34	50	37	8	6	8	1	5	2	PGG domain
TRIAE_CS42_7BL_TGACv1_579719_AA1909620	32	18	11	8	3	3	0	0	2	Proteolipid membrane potential modulator
TRIAE_CS42_7BS_TGACv1_591822_AA1922690	280	112	331	55	42	55	35	48	28	Haem peroxidase, plant/fungal/bacterial
TRIAE_CS42_7BS_TGACv1_592021_AA1928500	11	32	16	7	1	3	0	0	1	Zinc finger, C2H2
TRIAE_CS42_7BS_TGACv1_592109_AA1930670	15	12	12	2	4	2	1	2	3	#N/A
TRIAE_CS42_7BS_TGACv1_592371_AA1936870	110	36	43	13	7	6	0	2	1	consensus disorder prediction
TRIAE_CS42_7BS_TGACv1_592657_AA1942480	234	188	325	39	39	57	23	28	29	#N/A
TRIAE_CS42_7BS_TGACv1_592863_AA1945400	11	8	10	1	3	1	0	0	0	Xyloglucan fucosyltransferase
TRIAE_CS42_7BS_TGACv1_592887_AA1945780	14	12	13	2	3	5	1	1	0	Oxoglutarate/iron-dependent dioxygenase
TRIAE_CS42_7BS_TGACv1_592971_AA1946880	219	181	135	36	40	53	5	4	5	Disease resistance protein signature
TRIAE_CS42_7DL_TGACv1_602549_AA1960290	294	286	232	74	54	65	34	13	8	consensus disorder prediction
TRIAE_CS42_7DL_TGACv1_602590_AA1961690	20	18	25	2	7	4	11	0	2	Zinc finger, RING-type
TRIAE_CS42_7DL_TGACv1_602700_AA1965590	22	31	21	4	1	10	2	4	2	Cytochrome P450, E-class, group I
TRIAE_CS42_7DL_TGACv1_603033_AA1974180	4908	4662	2659	1139	544	934	231	188	258	Protein kinase domain
TRIAE_CS42_7DL_TGACv1_603101_AA1975900	135	204	109	17	5	9	0	3	0	Expansin/Lol pI
TRIAE_CS42_7DL_TGACv1_603101_AA1975920	352	676	362	91	62	82	40	56	45	RlpA-like protein, double-psi beta-barrel domain
TRIAE_CS42_7DL_TGACv1_603350_AA1981560	213	155	130	67	20	43	15	26	19	Leucine-rich repeat domain, L domain-like
TRIAE_CS42_7DL_TGACv1_603699_AA1987530	46	28	39	9	1	5	2	0	1	consensus disorder prediction
TRIAE_CS42_7DL_TGACv1_603703_AA1987640	611	504	409	202	62	139	144	65	98	Protein kinase domain
TRIAE_CS42_7DL_TGACv1_604498_AA1998680	45	52	36	3	5	5	2	5	0	Small auxin-up RNA
TRIAE_CS42_7DL_TGACv1_604758_AA2001360	157	134	89	25	33	36	26	10	11	#N/A
TRIAE_CS42_7DL_TGACv1_604887_AA2002700	261	209	369	66	76	77	17	23	19	Glycoside hydrolase, family 16, active site
TRIAE_CS42_7DL_TGACv1_605103_AA2004780	67	57	80	6	10	9	11	14	6	Small auxin-up RNA
TRIAE_CS42_7DL_TGACv1_605438_AA2006570	31	14	11	6	3	0	0	0	0	Cytochrome P450, conserved site
TRIAE_CS42_7DL_TGACv1_605493_AA2006850	29	23	20	8	5	4	1	0	7	Bulb-type lectin domain
TRIAE_CS42_7DS_TGACv1_621427_AA2015150	13	6	11	1	1	1	0	1	1	Peroxidases heam-ligand binding site
TRIAE_CS42_7DS_TGACv1_621445_AA2015690	57	42	55	11	8	19	8	14	10	P-loop containing nucleoside triphosphate hydrolase
TRIAE_CS42_7DS_TGACv1_621601_AA2020590	35	14	23	5	2	3	4	0	0	Transferase
TRIAE_CS42_7DS_TGACv1_621613_AA2021080	171	124	191	43	29	37	22	15	31	Haem peroxidase, plant/fungal/bacterial
TRIAE_CS42_7DS_TGACv1_621613_AA2021090	125	47	84	21	11	17	14	10	13	Plant peroxidase
TRIAE_CS42_7DS_TGACv1_621645_AA2022040	22	17	16	1	6	6	3	1	0	Aspartic peptidase domain
TRIAE_CS42_7DS_TGACv1_621731_AA2024510	232	93	273	49	29	52	22	19	25	Haem peroxidase
TRIAE_CS42_7DS_TGACv1_621832_AA2027170	62	41	48	7	10	14	9	4	5	Haem peroxidase, plant/fungal/bacterial
TRIAE_CS42_7DS_TGACv1_621832_AA2027180	127	93	147	23	29	37	13	22	5	Haem peroxidase, plant/fungal/bacterial
TRIAE_CS42_7DS_TGACv1_621856_AA2027690	15	16	12	3	5	1	3	2	0	consensus disorder prediction
TRIAE_CS42_7DS_TGACv1_622152_AA2033970	208	210	186	42	37	67	30	15	16	Haem peroxidase, plant/fungal/bacterial
TRIAE_CS42_7DS_TGACv1_622226_AA2035840	181	65	106	53	5	26	9	5	9	consensus disorder prediction
TRIAE_CS42_7DS_TGACv1_622347_AA2038120	16	12	26	9	3	3	1	3	4	consensus disorder prediction
TRIAE_CS42_7DS_TGACv1_622353_AA2038220	164	59	176	10	24	34	22	19	29	Expansin, cellulose-binding-like domain
TRIAE_CS42_7DS_TGACv1_622658_AA2043410	358	383	146	77	66	66	22	9	7	Protein kinase domain
TRIAE_CS42_7DS_TGACv1_622703_AA2044120	55	25	31	13	4	6	0	0	0	Leucine-rich repeat domain, L domain-like
TRIAE_CS42_7DS_TGACv1_622703_AA2044130	199	92	81	53	3	23	0	3	0	Disease resistance protein signature
TRIAE_CS42_7DS_TGACv1_624465_AA2061560	79	49	67	19	5	23	5	4	6	consensus disorder prediction
TRIAE_CS42_7DS_TGACv1_625472_AA2065270	39	19	27	5	2	2	0	0	1	#N/A
TRIAE_CS42_U_TGACv1_640728_AA2071360	97	89	69	20	21	21	13	2	2	NAD(P)-binding domain
TRIAE_CS42_U_TGACv1_640842_AA2076840	15	8	20	3	0	2	1	0	0	#N/A
TRIAE_CS42_U_TGACv1_640956_AA2080670	24	14	12	6	3	4	1	1	1	Domain unknown function DUF295
TRIAE_CS42_U_TGACv1_640959_AA2080990	36	21	39	4	5	5	6	2	4	Chloramphenicol acetyltransferase-like domain
TRIAE_CS42_U_TGACv1_641120_AA2086080	21	15	10	1	0	1	1	0	0	#N/A
TRIAE_CS42_U_TGACv1_641234_AA2089150	32	18	38	5	6	10	2	1	0	Domain of unknown function DUF4220
TRIAE_CS42_U_TGACv1_641365_AA2093120	179	110	145	35	19	35	6	10	6	Major facilitator superfamily domain
TRIAE_CS42_U_TGACv1_641524_AA2097160	32	24	27	4	8	7	6	2	0	Glycosyl hydrolases family 9, Asp/Glu active sites
TRIAE_CS42_U_TGACv1_641607_AA2099380	10	9	12	0	1	3	0	0	0	consensus disorder prediction
TRIAE_CS42_U_TGACv1_641612_AA2099460	64	56	61	11	9	3	4	3	4	Bulb-type lectin domain
TRIAE_CS42_U_TGACv1_641703_AA2102040	45	45	30	8	2	8	16	8	3	Eggshell protein signature
TRIAE_CS42_U_TGACv1_642196_AA2113120	8	15	7	3	0	2	1	0	0	Basic-leucine zipper domain
TRIAE_CS42_U_TGACv1_642634_AA2120690	27	49	41	4	2	2	0	9	1	#N/A
TRIAE_CS42_U_TGACv1_642634_AA2120720	45	72	56	1	6	0	1	1	0	#N/A
TRIAE_CS42_U_TGACv1_643081_AA2127030	31	38	25	8	6	7	5	5	7	Endonuclease/exonuclease/phosphatase
TRIAE_CS42_U_TGACv1_643334_AA2130850	114	109	86	12	7	23	32	18	7	F-box domain
TRIAE_CS42_U_TGACv1_644020_AA2136550	130	192	109	31	27	23	20	27	29	#N/A
TRIAE_CS42_U_TGACv1_644240_AA2138290	51	20	31	17	4	5	14	0	6	consensus disorder prediction
TRIAE_CS42_U_TGACv1_644501_AA2140020	193	199	160	43	23	48	34	40	44	Peroxidases heam-ligand binding site
TRIAE_CS42_U_TGACv1_645910_AA2145700	144	204	119	53	10	28	12	32	42	#N/A
TRIAE_CS42_U_TGACv1_689693_AA2160560	44	13	24	3	4	4	0	2	1	#N/A

## Sheet: ABA-independent signalling 3 h
Genes in red were up-regulated at 3 h osmotic stress, and the genes in green were down-regulated at 3 h osmotic stress in ABA-independent signalling pathway.
Gene_id	CK_3 h (1)	CK_3 h (2)	CK_3 h (3)	PEG_3 h (1)	PEG_3 h (2)	PEG_3 h (3)	ABA_3 h (1)	ABA_3 h (2)	ABA_3 h (3)	Gene description
Novel00020	1	0	0	17	5	12	1	2	0	hypothetical protein F775_30343 [Aegilops tauschii]
Novel00022	299	195	373	2281	2006	1890	455	453	493	predicted protein [Hordeum vulgare subsp. vulgare]
Novel00198	18	7	5	71	64	56	7	5	7	predicted protein [Hordeum vulgare subsp. vulgare]
Novel00254	260	240	213	5472	2962	3945	155	166	161	predicted protein [Hordeum vulgare subsp. vulgare]
Novel00266	49	59	48	382	262	226	49	52	37	hypothetical protein TRIUR3_23565 [Triticum urartu]
Novel00499	321	257	283	2451	1968	1785	511	507	582	predicted protein [Hordeum vulgare subsp. vulgare]>gi|326528287|dbj|BAJ93325.1| predicted protein [Hordeum vulgare subsp. vulgare]
Novel00579	8	8	3	57	52	38	6	13	5	#N/A
Novel00602	12	4	9	49	38	33	16	6	8	#N/A
Novel00624	8	12	12	81	94	53	12	7	7	#N/A
Novel00645	6	10	4	26	33	25	31	9	2	Endo-1,3;1,4-beta-D-glucanase [Triticum urartu]
Novel00666	3	3	0	16	17	14	3	2	2	#N/A
Novel00682	31	31	35	210	85	165	31	26	42	predicted protein [Hordeum vulgare subsp. vulgare]>gi|326527957|dbj|BAJ89030.1| predicted protein [Hordeum vulgare subsp. vulgare]
Novel00690	3	2	1	29	44	13	59	7	13	Chromosome-associated kinesin KIF4A [Triticum urartu]
Novel00773	2	8	4	25	24	11	32	11	5	Pyruvate kinase, cytosolic isozyme [Aegilops tauschii]
Novel00778	6	1	6	35	38	21	9	8	7	predicted protein [Hordeum vulgare subsp. vulgare]
Novel00781	5	5	6	24	24	22	0	4	4	MADS-box transcription factor 56 [Triticum urartu]
Novel00809	22	15	15	110	62	74	14	6	11	hypothetical protein F775_23746 [Aegilops tauschii]
Novel00833	1	0	1	16	4	8	1	0	1	PREDICTED: probable carboxylesterase 15-like [Oryza brachyantha]
Novel00933	46	46	53	295	187	185	38	25	30	predicted protein [Hordeum vulgare subsp. vulgare]
Novel01038	464	455	449	4220	2098	5022	861	398	560	O-methyltransferase ZRP4 [Aegilops tauschii]
Novel01082	478	440	578	2472	2126	1890	560	409	417	NADP-dependent malic enzyme [Triticum aestivum]
Novel01107	10	6	9	54	59	31	11	7	5	predicted protein [Hordeum vulgare subsp. vulgare]
Novel01160	9	15	24	68	75	59	17	17	13	#N/A
Novel01200	4	9	7	70	37	47	21	10	14	hypothetical protein F775_24321 [Aegilops tauschii]
Novel01216	2	4	0	75	95	72	31	1	7	threonyl-tRNA synthetase [Oryza sativa Japonica Group]
Novel01241	1	1	3	75	60	59	14	2	4	Putative WRKY transcription factor 38 [Aegilops tauschii]
Novel01267	5	8	6	32	37	25	19	8	8	PREDICTED: pumilio homolog 4-like [Phoenix dactylifera]
Novel01287	0	0	2	9	24	16	1	0	0	PREDICTED: stachyose synthase-like [Setaria italica]
Novel01291	3	4	10	24	31	33	43	14	10	hypothetical protein F775_24992 [Aegilops tauschii]
Novel01573	15	14	7	81	58	59	12	15	10	hypothetical protein F775_24321 [Aegilops tauschii]
Novel01614	11	4	8	74	42	51	0	2	0	hypothetical protein F775_02490 [Aegilops tauschii]
Novel01617	0	0	1	94	96	49	11	1	1	PREDICTED: rop guanine nucleotide exchange factor 2-like [Brachypodium distachyon]
Novel01696	0	0	0	84	79	66	1	0	0	PREDICTED: uncharacterized protein LOC101757508 [Setaria italica]
Novel01711	18	13	19	6451	4186	6171	974	60	184	Alternative oxidase 1a, mitochondrial [Triticum urartu]
Novel01753	0	0	0	31	17	26	0	1	0	putative AP2 protein [Hordeum vulgare]
Novel01756	385	317	314	2443	1335	1454	1577	743	820	Arogenate dehydratase/prephenate dehydratase 6, chloroplastic [Triticum urartu]
Novel01809	14	6	4	69	36	37	22	14	29	#N/A
Novel01948	68	51	54	502	229	186	212	136	102	Mitochondrial protein, putative [Medicago truncatula]
Novel01952	3	5	5	61	84	84	178	8	7	putative glutathione S-transferase [Triticum urartu]
Novel01953	0	0	1	13	8	9	9	1	2	#N/A
Novel02008	19	19	14	110	80	88	33	10	14	hypothetical protein TRIUR3_20134 [Triticum urartu]
Novel02139	2	1	5	34	15	19	0	0	4	Cytochrome P450 99A2 [Triticum urartu]
Novel02206	7	9	23	134	118	139	325	31	14	PREDICTED: probable serine/threonine-protein kinase kinX-like [Oryza brachyantha]
Novel02398	1	0	1	14	13	16	13	3	2	CDK5RAP1-like protein [Triticum urartu]
Novel02599	749	379	455	4367	2544	3282	945	1486	1931	predicted protein [Hordeum vulgare subsp. vulgare]
Novel02654	28	22	30	184	96	109	27	51	71	Ubiquitin carboxyl-terminal hydrolase 9 [Triticum urartu]
Novel02720	0	0	0	8	9	5	5	1	4	#N/A
Novel02749	72	76	44	484	243	246	33	18	19	hypothetical protein F775_25131 [Aegilops tauschii]
Novel02798	12	5	6	55	41	47	2	1	4	PREDICTED: UDP-glycosyltransferase 76C2-like [Brachypodium distachyon]
Novel02802	12	12	4	48	39	38	64	9	8	hypothetical protein MIMGU_mgv1a007193mg [Erythranthe guttata]
Novel02930	1	2	1	8	13	12	7	3	3	hypothetical protein TRIUR3_33596 [Triticum urartu]
Novel03125	0	0	0	9	15	8	0	0	0	hypothetical protein TRIUR3_13982 [Triticum urartu]
Novel03186	26	27	18	207	102	78	28	38	17	hypothetical protein SORBIDRAFT_09g002195 [Sorghum bicolor]>gi|241944487|gb|EES17632.1| hypothetical protein SORBIDRAFT_09g002195 [Sorghum bicolor]
Novel03203	6	8	8	144	134	96	11	6	5	predicted protein [Hordeum vulgare subsp. vulgare]
Novel03231	1	0	1	22	31	23	0	0	1	hypothetical protein F775_52582 [Aegilops tauschii]
Novel03255	22	18	22	95	91	81	30	18	19	hypothetical protein F775_09857 [Aegilops tauschii]
Novel03297	7	9	6	52	29	25	12	9	9	hypothetical protein F775_24119 [Aegilops tauschii]
Novel03329	49	34	43	14996	9564	12900	767	72	161	Alternative oxidase 1a, mitochondrial [Triticum urartu]
Novel03339	8	0	1	487	161	273	17	5	4	hypothetical protein F775_43817 [Aegilops tauschii]
Novel03373	10	26	20	110	80	84	77	41	39	hypothetical protein TRIUR3_26052 [Triticum urartu]
Novel03437	165	160	125	875	435	685	445	336	275	putative gag-pol polyprotein [Triticum monococcum subsp. aegilopoides]
Novel03478	72	23	65	361	199	280	516	73	196	hypothetical protein F775_04286 [Aegilops tauschii]
Novel03492	11	10	9	56	56	38	9	4	5	hypothetical protein TRIUR3_27340 [Triticum urartu]
Novel03500	0	0	0	39	30	28	0	0	0	Putative UDP-glucosyltransferase [Aegilops tauschii]
Novel03584	9	2	6	53	59	34	8	1	3	#N/A
Novel03585	72	12	64	4002	3141	4212	122	101	196	PREDICTED: cytochrome P450 734A6-like [Oryza brachyantha]
Novel03690	52	51	49	239	232	214	116	50	45	Os01g0838100 [Oryza sativa Japonica Group]>gi|56784643|dbj|BAD81690.1| helicase-like protein [Oryza sativa Japonica Group]>gi|113534274|dbj|BAF06657.1| Os01g0838100 [Oryza sativa Japonica Group]
Novel03783	7	16	6	1139	796	1001	172	21	18	unnamed protein product [Triticum aestivum]
Novel03865	6	8	6	117	48	69	20	2	13	unnamed protein product [Triticum aestivum]
Novel03866	0	0	0	10	18	4	1	0	1	28 kDa ribonucleoprotein, chloroplastic [Triticum urartu]
Novel03887	4	7	1	26	13	19	4	5	6	hypothetical protein TRIUR3_19894 [Triticum urartu]
Novel03891	7	6	2	42	21	34	11	3	4	unnamed protein product [Triticum aestivum]
Novel03908	7	9	7	48	25	32	12	11	4	#N/A
Novel03919	26	7	3	304	665	423	918	32	26	predicted protein [Hordeum vulgare subsp. vulgare]
Novel04019	13	8	4	34	37	46	2	2	4	hypothetical protein TRIUR3_23678 [Triticum urartu]
Novel04059	3	2	5	49	46	47	7	7	5	Disease resistance protein RPM1 [Aegilops tauschii]
Novel04080	2	1	0	13	6	9	5	1	3	hypothetical protein EUGRSUZ_I01852 [Eucalyptus grandis]
Novel04179	1	3	3	14	27	13	3	3	1	hypothetical protein TRIUR3_29849 [Triticum urartu]
Novel04266	91	94	106	649	629	554	20	31	38	Peroxidase 72 [Aegilops tauschii]
Novel04300	18	26	18	222	155	128	51	20	13	retrotransposon protein, putative, unclassified, expressed [Oryza sativa Japonica Group]
Novel04425	3	6	3	189	135	165	17	13	10	Putative calcium-binding protein CML31 [Aegilops tauschii]
Novel04429	11	5	11	36	41	39	3	5	2	OSJNBa0035M09.1 [Oryza sativa Japonica Group]>gi|38346911|emb|CAE03883.2| OSJNBb0015N08.11 [Oryza sativa Japonica Group]
Novel04464	2	0	0	13	6	6	6	1	0	hypothetical protein F775_52464 [Aegilops tauschii]
Novel04469	106	100	121	562	541	485	187	132	127	DNA replication licensing factor MCM8 [Triticum urartu]
Novel04517	9	11	14	71	35	81	11	9	5	NPR1-like 1 protein [Triticum turgidum subsp. durum]
Novel04683	98	86	115	693	307	767	524	98	136	unnamed protein product [Triticum aestivum]
Novel04698	15	12	6	89	47	57	14	19	8	#N/A
Novel04752	1	3	1	21	11	6	4	3	0	hypothetical protein F775_10732 [Aegilops tauschii]
Novel04812	792	333	436	8436	4979	5120	1568	781	968	predicted protein [Hordeum vulgare subsp. vulgare]
Novel04830	2	5	0	44	36	28	11	4	2	predicted protein [Hordeum vulgare subsp. vulgare]>gi|326519414|dbj|BAJ96706.1| predicted protein [Hordeum vulgare subsp. vulgare]>gi|326532770|dbj|BAJ89230.1| predicted protein [Hordeum vulgare subsp. vulgare]
Novel04858	13	14	21	125	48	80	201	25	34	hypothetical protein TAA_ctg0954b.00210.1 [Triticum aestivum]
Novel04902	0	0	0	24	21	13	0	0	0	hypothetical protein F775_23144 [Aegilops tauschii]
Novel04903	3	1	1	18	7	23	2	0	5	#N/A
Novel04934	6	8	5	51	33	38	7	0	9	Ubiquitin carrier protein E2 28 [Aegilops tauschii]
Novel04986	0	1	0	59	60	32	3	1	3	hypothetical protein TRIUR3_08303 [Triticum urartu]
Novel05048	6	10	11	57	31	39	29	26	24	predicted protein [Hordeum vulgare subsp. vulgare]
Novel05203	2	3	3	20	32	15	9	6	3	#N/A
Novel05216	3	3	5	29	16	19	10	4	13	#N/A
Novel05356	1	1	0	26	18	26	3	2	1	putative calcium-binding protein CML31 [Triticum urartu]
Novel05373	21	11	13	643	306	473	85	21	51	hypothetical protein F775_32176 [Aegilops tauschii]
Novel05400	43	35	30	332	145	187	46	27	27	unnamed protein product [Triticum aestivum]
Novel05449	315	311	303	2175	1676	1579	235	101	105	predicted protein [Hordeum vulgare subsp. vulgare]
Novel05453	14	8	19	96	61	70	25	19	20	Spastin [Aegilops tauschii]
Novel05454	16	16	20	103	89	54	27	34	20	unnamed protein product [Triticum aestivum]
Novel05596	4	1	3	18	10	11	14	14	5	#N/A
Novel05628	4	7	1	195	173	131	59	2	0	predicted protein [Hordeum vulgare subsp. vulgare]
Novel05733	15	34	24	123	123	105	19	16	20	putative WRKY transcription factor 69 [Triticum urartu]
Novel05739	49	12	12	211	149	179	63	60	87	unnamed protein product [Triticum aestivum]
Novel05832	0	1	1	18	28	23	1	1	1	hypothetical protein F775_18624 [Aegilops tauschii]
Novel05841	125	108	164	1214	776	939	246	208	269	predicted protein [Hordeum vulgare subsp. vulgare]>gi|326524279|dbj|BAK00523.1| predicted protein [Hordeum vulgare subsp. vulgare]
Novel05845	3	5	1	29	30	24	15	8	2	hypothetical protein F775_09498 [Aegilops tauschii]
Novel05874	5	3	1	20	11	17	4	1	1	#N/A
Novel05931	8	7	3	204	117	147	6	4	6	hypothetical protein F775_09348 [Aegilops tauschii]
Novel05934	3	3	1	19	7	14	8	0	0	#N/A
Novel06017	0	0	1	9	14	10	2	0	1	hypothetical protein F775_11310 [Aegilops tauschii]
Novel06018	3	0	1	19	9	8	6	1	2	hypothetical protein TRIUR3_04340 [Triticum urartu]
Novel06100	19	15	9	72	52	58	22	7	6	#N/A
Novel06114	4	8	7	44	25	22	7	9	7	#N/A
Novel06192	491	537	505	2965	1971	2252	343	152	239	predicted protein [Hordeum vulgare subsp. vulgare]>gi|326531472|dbj|BAJ97740.1| predicted protein [Hordeum vulgare subsp. vulgare]
Novel06201	10	12	7	126	48	66	197	42	53	hypothetical protein TRIUR3_30190 [Triticum urartu]
Novel06332	18	7	4	263	148	183	0	0	1	GDSL esterase/lipase [Aegilops tauschii]
Novel06341	465	405	289	9671	6503	8000	983	672	722	predicted protein [Hordeum vulgare subsp. vulgare]
Novel06369	1	5	2	18	14	12	2	2	1	#N/A
Novel06370	0	1	0	36	20	19	4	2	5	Disease resistance protein RPM1 [Aegilops tauschii]
Novel06503	18	18	26	196	35	155	83	43	39	PREDICTED: uncharacterized protein LOC100824438 [Brachypodium distachyon]
Novel06682	0	0	1	19	35	13	175	5	6	#N/A
Novel06693	0	0	0	51	37	46	0	0	0	hypothetical protein TRIUR3_26310 [Triticum urartu]
Novel06791	35	42	22	948	791	672	86	34	47	Alanyl-tRNA synthetase, mitochondrial [Aegilops tauschii]
Novel06833	2	3	3	347	200	287	15	2	1	predicted protein [Hordeum vulgare subsp. vulgare]
Novel06891	7	12	7	30	42	36	16	16	21	putative polyprotein [Oryza sativa Japonica Group]>gi|108710909|gb|ABF98704.1| retrotransposon protein, putative, unclassified [Oryza sativa Japonica Group]
Novel07045	8	11	14	111	100	70	6	9	4	unnamed protein product [Triticum aestivum]
Novel07063	98	83	72	1649	1201	1290	281	79	116	Blue copper protein [Aegilops tauschii]
Novel07179	36	33	19	161	118	133	48	62	32	hypothetical protein F775_31950 [Aegilops tauschii]
Novel07184	55	37	29	212	207	146	52	45	39	hypothetical protein TRIUR3_07861 [Triticum urartu]
Novel07187	2	6	1	17	10	14	4	9	3	#N/A
Novel07254	1	4	0	15	4	18	7	10	4	#N/A
Novel07355	0	2	0	22	19	34	2	4	2	hypothetical protein F775_06281 [Aegilops tauschii]
Novel07356	0	2	0	49	56	47	8	8	4	PREDICTED: probable WRKY transcription factor 7-like [Brachypodium distachyon]
Novel07443	258	275	260	6880	3376	5469	578	176	186	Protein TRANSPARENT TESTA 12 [Aegilops tauschii]
Novel07456	11	20	7	83	51	56	12	8	1	#N/A
Novel07486	0	0	0	11	6	11	2	0	0	PREDICTED: elongation factor 1-delta-like [Brachypodium distachyon]
Novel07514	393	393	443	2624	1544	1759	432	341	313	hypothetical protein TRIUR3_34484 [Triticum urartu]
Novel07539	284	209	356	2653	1036	1496	106	149	160	Flavonoid 3',5'-hydroxylase 1 [Aegilops tauschii]
Novel07540	399	306	307	3248	1151	1786	77	68	66	Flavonoid 3',5'-hydroxylase 1 [Aegilops tauschii]
Novel07573	0	0	0	6	8	4	1	0	0	hypothetical protein SORBIDRAFT_01g020751 [Sorghum bicolor]>gi|241918413|gb|EER91557.1| hypothetical protein SORBIDRAFT_01g020751 [Sorghum bicolor]
Novel07635	0	1	2	29	13	8	0	1	0	#N/A
Novel07649	6	5	3	58	46	32	14	3	2	hypothetical protein TRIUR3_04945 [Triticum urartu]
Novel07656	1	2	1	13	7	10	11	1	2	#N/A
Novel07681	0	0	0	18	24	22	0	0	0	hypothetical protein OsI_13900 [Oryza sativa Indica Group]
Novel07710	195	182	199	2245	872	1518	711	363	453	predicted protein [Hordeum vulgare subsp. vulgare]
Novel07764	250	62	112	1128	708	945	371	272	504	hypothetical protein TRIUR3_12375 [Triticum urartu]
Novel07796	1	0	0	13	13	18	0	1	3	Beta-fructofuranosidase, insoluble isoenzyme 4 [Triticum urartu]
Novel07903	24	24	28	122	109	104	35	20	15	predicted protein [Hordeum vulgare subsp. vulgare]
Novel08063	2	1	0	10	9	8	1	0	0	#N/A
Novel08076	61	48	50	274	230	241	78	55	53	hypothetical protein TRIUR3_31986 [Triticum urartu]
Novel08118	177	101	102	927	268	669	168	96	145	predicted protein [Hordeum vulgare subsp. vulgare]>gi|326531602|dbj|BAJ97805.1| predicted protein [Hordeum vulgare subsp. vulgare]
Novel08245	35	18	14	129	90	104	42	31	16	hypothetical protein TRIUR3_13865 [Triticum urartu]
Novel08273	8	8	8	34	39	33	35	29	17	predicted protein [Hordeum vulgare subsp. vulgare]>gi|326521802|dbj|BAK00477.1| predicted protein [Hordeum vulgare subsp. vulgare]
Novel08281	3	1	0	17	6	9	7	5	1	Myb-related protein 3R-1 [Triticum urartu]
Novel08288	0	1	0	658	387	431	27	2	10	hypothetical protein TRIUR3_01065 [Triticum urartu]
Novel08347	2	11	11	102	59	73	17	18	7	hypothetical protein F775_24119 [Aegilops tauschii]
Novel08368	12	9	4	82	139	72	49	11	6	Pleiotropic drug resistance protein 4 [Triticum urartu]
Novel08381	2	2	1	11	13	8	14	5	1	Serine/threonine phosphatase BSL1-like protein [Aegilops tauschii]
Novel08409	8	4	6	30	39	23	9	20	10	hypothetical protein F775_00516 [Aegilops tauschii]
Novel08413	162	155	143	1201	788	927	182	164	133	hypothetical protein F775_22814 [Aegilops tauschii]
Novel08425	53	44	75	267	280	201	128	72	73	predicted protein [Hordeum vulgare subsp. vulgare]
Novel08449	525	350	334	3960	3448	3785	1018	946	1167	predicted protein [Hordeum vulgare subsp. vulgare]
Novel08496	0	0	4	27	80	36	1	4	0	#N/A
Novel08572	5	8	1	26	22	37	9	12	8	predicted protein [Hordeum vulgare subsp. vulgare]
Novel08581	6	2	0	15	16	10	9	7	3	hypothetical protein OsJ_17229 [Oryza sativa Japonica Group]
Novel08639	8	9	14	85	90	62	37	17	17	uncharacterized protein LOC100383209 [Zea mays]>gi|224028827|gb|ACN33489.1| unknown [Zea mays]
Novel08702	37	55	42	299	168	328	1456	243	228	hypothetical protein TRIUR3_34545 [Triticum urartu]
Novel08718	30	18	10	122	115	58	10	8	14	hypothetical protein TRIUR3_17639 [Triticum urartu]
Novel08723	87	74	66	643	308	452	95	120	127	hAT family dimerisation domain containing protein [Oryza sativa Japonica Group]
Novel08774	33	40	39	165	189	212	24	42	82	Auxin-responsive protein IAA14 [Aegilops tauschii]
Novel08912	61	69	104	778	365	506	139	112	199	ABC transporter G family member 11 [Triticum urartu]
Novel08913	17	12	22	133	52	110	41	25	49	predicted protein [Hordeum vulgare subsp. vulgare]
Novel08976	474	482	470	4003	2610	3434	1070	743	772	PREDICTED: NADPH--cytochrome P450 reductase-like [Brachypodium distachyon]
Novel08983	360	337	344	2623	1523	1915	431	420	366	hypothetical protein F775_22814 [Aegilops tauschii]
Novel09006	17	11	19	251	67	243	34	15	33	predicted protein [Hordeum vulgare subsp. vulgare]
Novel09007	35	39	41	680	301	494	45	28	66	ABC transporter G family member 11 [Triticum urartu]
Novel09023	6	7	8	30	49	34	21	12	14	hypothetical protein F775_52714 [Aegilops tauschii]
Novel09083	207	71	112	1832	1149	1527	519	330	513	#N/A
Novel09257	0	4	1	40	23	23	6	6	1	hypothetical protein F775_24119 [Aegilops tauschii]
Novel09365	15	14	14	149	115	90	32	16	17	hypothetical protein F775_09470 [Aegilops tauschii]
Novel09403	0	0	0	5	3	7	5	4	3	Endoglucanase E1 [Aegilops tauschii]
Novel09469	3	3	2	15	7	22	8	1	3	Metal-nicotianamine transporter YSL2 [Triticum urartu]
Novel09514	15	0	6	1184	864	864	12	7	6	hypothetical protein TRIUR3_01950 [Triticum urartu]
Novel09521	0	0	0	27	49	28	0	2	0	#N/A
Novel09532	42	41	47	333	309	235	36	30	36	predicted protein [Hordeum vulgare subsp. vulgare]
Novel09667	7	5	6	43	24	30	8	11	4	Secretory carrier-associated membrane protein 3 [Triticum urartu]
Novel09693	216	230	174	2141	1185	1539	180	139	108	Endoglucanase 5 [Aegilops tauschii]
Novel09703	49	39	39	381	176	372	81	29	40	L-aspartate oxidase 1 [Triticum urartu]
Novel09717	1	4	0	15	12	17	7	7	3	ABC transporter B family member 19 [Aegilops tauschii]
Novel09723	14	7	0	45	19	47	51	16	4	hypothetical protein TRIUR3_13071 [Triticum urartu]
Novel09811	21	21	17	97	83	68	34	17	17	hypothetical protein F775_02274 [Aegilops tauschii]
Novel09914	13	12	10	55	65	53	9	9	15	hypothetical protein F775_25131 [Aegilops tauschii]
Novel09926	7	11	1	96	55	54	17	16	8	hypothetical protein F775_10149 [Aegilops tauschii]
Novel09973	111	137	120	692	400	570	357	341	305	hypothetical protein F775_24407 [Aegilops tauschii]
Novel10301	45	37	18	184	132	154	23	35	45	hypothetical protein F775_05731 [Aegilops tauschii]
Novel10317	7	7	6	42	27	30	12	13	8	predicted protein [Hordeum vulgare subsp. vulgare]>gi|326532154|dbj|BAK01453.1| predicted protein [Hordeum vulgare subsp. vulgare]
Novel10369	1	0	0	11	9	21	2	0	1	hypothetical protein TRIUR3_26289 [Triticum urartu]
Novel10548	1	1	2	37	20	35	7	5	1	hypothetical protein F775_06504 [Aegilops tauschii]
Novel10595	7	10	12	54	38	34	21	18	11	phosphate transporter 2-1 [Triticum aestivum]
Novel10719	0	0	0	2	9	7	108	5	4	2-alpha-hydroxytaxane 2-O-benzoyltransferase [Aegilops tauschii]
Novel10861	2	1	1	539	459	471	5	0	4	hypothetical protein F775_18647 [Aegilops tauschii]
Novel10881	2	0	0	11	6	13	9	2	0	hypothetical protein SORBIDRAFT_10g002373 [Sorghum bicolor]>gi|241914653|gb|EER87797.1| hypothetical protein SORBIDRAFT_10g002373 [Sorghum bicolor]
Novel10918	0	0	2	17	26	12	6	7	5	Polyphenol oxidase A1, chloroplastic [Triticum urartu]
Novel10954	0	0	0	10	3	5	4	1	1	putative O-methyltransferase 2 [Triticum urartu]
Novel10956	4	6	1	31	12	18	2	1	1	Glucan endo-1,3-beta-glucosidase 14 [Triticum urartu]
Novel10983	7	2	5	53	43	34	19	5	4	elicitor and UV light related transcription factor [Oryza sativa]
Novel11007	1	6	1	19	18	10	3	2	3	hypothetical protein TRIUR3_28538 [Triticum urartu]
Novel11031	6	10	8	59	39	32	23	14	14	Receptor-like serine/threonine-protein kinase SD1-6 [Triticum urartu]
Novel11047	5	2	11	108	108	61	9	10	16	Putative disease resistance protein [Aegilops tauschii]
Novel11151	2	1	3	10	18	18	4	5	6	Sodium/hydrogen exchanger 7 [Aegilops tauschii]
Novel11162	18	7	7	94	49	45	23	16	11	hypothetical protein TRIUR3_28601 [Triticum urartu]
Novel11178	33	7	14	89	91	69	13	13	11	Cyclopropane-fatty-acyl-phospholipid synthase [Triticum urartu]
Novel11180	7	2	5	30	25	34	20	10	7	#N/A
Novel11181	11	13	1	57	68	55	59	15	20	predicted protein [Hordeum vulgare subsp. vulgare]
Novel11217	5	2	2	16	18	12	7	7	8	PREDICTED: glycogen synthase kinase-3 homolog MsK-3-like [Fragaria vesca subsp. vesca]
Novel11282	247	50	69	2016	998	1045	306	189	276	predicted protein [Hordeum vulgare subsp. vulgare]
Novel11332	124	95	193	865	540	654	223	262	312	#N/A
Novel11342	5	5	1	28	12	11	3	3	6	#N/A
Novel11346	2	2	0	17	20	14	8	2	2	Tryptophanyl-tRNA synthetase, cytoplasmic [Triticum urartu]
Novel11362	5	8	0	39	15	30	2	3	1	#N/A
Novel11577	1	4	4	95	127	105	32	5	8	predicted protein [Hordeum vulgare subsp. vulgare]>gi|326519128|dbj|BAJ96563.1| predicted protein [Hordeum vulgare subsp. vulgare]
Novel11604	9	6	6	51	23	30	11	58	29	predicted protein [Hordeum vulgare subsp. vulgare]
Novel11613	892	836	598	4699	2502	3534	2890	1412	1658	arginine decarboxylase [Triticum aestivum]
Novel11615	3	2	1	92	14	66	2	1	1	Subtilisin-like protease [Aegilops tauschii]
Novel11783	0	1	1	30	17	27	5	7	3	Os10g0317000 [Oryza sativa Japonica Group]>gi|15217201|gb|AAK92545.1|AC051624_3 Putative retroelement [Oryza sativa Japonica Group]>gi|31431040|gb|AAP52878.1| retrotransposon protein, putative, unclassified, expressed [Oryza sativa Japonica Group]>gi|113638940|dbj|BAF26245.1| Os10g0317000 [Oryza sativa Japonica Group]
Novel11985	72	87	72	508	310	364	69	54	47	PREDICTED: probable protein phosphatase 2C 65-like [Brachypodium distachyon]
Novel12020	9	7	2	65	30	37	17	5	1	hypothetical protein F775_06595 [Aegilops tauschii]
Novel12070	4	2	4	24	21	7	34	4	10	Ji1 putative pol protein [Zea mays]
Novel12175	66	64	40	461	232	296	50	29	22	hypothetical protein F775_15833 [Aegilops tauschii]
Novel12297	0	0	0	10	20	17	4	4	1	Leucoanthocyanidin reductase [Aegilops tauschii]
Novel12356	6	0	10	115	82	114	9	38	28	hypothetical protein OsJ_07834 [Oryza sativa Japonica Group]
Novel12382	73	90	77	570	409	568	311	34	20	hypothetical protein F775_19336 [Aegilops tauschii]
Novel12435	1	0	2	40	38	28	8	0	2	hAT family dimerisation domain containing protein [Oryza sativa Japonica Group]
Novel12511	4	10	4	45	28	18	43	5	13	hypothetical protein TRIUR3_13402 [Triticum urartu]
Novel12537	7	8	12	60	32	62	22	29	30	#N/A
Novel12587	15	15	37	429	163	337	50	32	45	predicted protein [Hordeum vulgare subsp. vulgare]
Novel12613	7	5	6	966	613	664	62	10	2	BRCT domain-containing protein [Aegilops tauschii]
Novel12627	0	0	1	8	15	11	6	3	8	#N/A
Novel12637	2	0	1	20	14	16	5	3	1	#N/A
Novel12772	2	1	2	82	26	41	9	10	8	hypothetical protein F775_00984 [Aegilops tauschii]
Novel12785	3	4	1	22	12	23	0	1	2	hypothetical protein F775_25131 [Aegilops tauschii]
Novel12813	20	36	12	153	203	138	600	32	19	hypothetical protein F775_16794 [Aegilops tauschii]
Novel12826	19	12	17	127	94	85	41	26	18	hypothetical protein F775_24119 [Aegilops tauschii]
Novel12932	5	19	2	28	49	36	496	20	7	hypothetical protein F775_19336 [Aegilops tauschii]
Novel12937	17	7	18	60	57	63	21	12	12	Ubiquitin carboxyl-terminal hydrolase 2 [Aegilops tauschii]
Novel13062	2	4	3	15	11	16	3	0	2	#N/A
Novel13105	0	1	0	0	36	52	19	0	0	#N/A
Novel13110	7	14	4	36	51	41	14	10	9	#N/A
Novel13159	14	0	2	253	295	207	7	13	6	hypothetical protein TRIUR3_11311 [Triticum urartu]
Novel13164	11	10	16	89	78	109	2	0	0	MATE efflux family protein 5 [Triticum urartu]
Novel13220	2	2	4	12	15	16	7	6	1	predicted protein [Hordeum vulgare subsp. vulgare]>gi|326502376|dbj|BAJ95251.1| predicted protein [Hordeum vulgare subsp. vulgare]
Novel13223	120	142	65	650	406	432	61	52	48	Putative vacuolar protein sorting-associated protein 13A [Triticum urartu]
Novel13251	2	6	6	48	18	26	13	18	10	predicted protein [Hordeum vulgare subsp. vulgare]
Novel13290	26	17	24	189	132	109	37	28	29	predicted protein [Hordeum vulgare subsp. vulgare]
Novel13303	74	90	53	578	427	405	49	47	57	hypothetical protein F775_25131 [Aegilops tauschii]
Novel13412	2	7	3	87	88	67	14	10	1	hypothetical protein F775_52197 [Aegilops tauschii]
Novel13508	8	23	8	110	67	44	9	5	10	predicted protein [Hordeum vulgare subsp. vulgare]
Novel13542	0	0	0	76	116	61	11	3	2	PREDICTED: uncharacterized protein LOC103849841, partial [Brassica rapa]
Novel13544	1	0	1	2	21	23	148	14	6	hypothetical protein TRIUR3_09772 [Triticum urartu]
Novel13571	6	4	3	30	19	18	15	0	2	hypothetical protein TRIUR3_23939 [Triticum urartu]
Novel13614	18	13	15	63	61	76	52	23	24	hypothetical protein F775_24407 [Aegilops tauschii]
Novel13659	39	27	41	280	205	210	46	50	59	Ubiquitin fusion degradation protein 1-like protein [Triticum urartu]
Novel13917	288	216	183	1462	656	1364	912	425	565	Ubiquitin fusion degradation protein 1-like protein [Triticum urartu]
Novel13980	30	28	21	366	270	254	86	31	47	OSJNBb0118P14.3 [Oryza sativa Japonica Group]
Novel14051	1	2	0	20	10	16	13	2	4	putative mutator protein [Oryza sativa Japonica Group]
Novel14150	2	1	1	21	3	18	15	0	2	Germin-like protein 8-5 [Triticum urartu]
Novel14166	1	4	1	14	30	20	4	10	3	predicted protein [Hordeum vulgare subsp. vulgare]
Novel14209	346	283	286	2249	1492	1927	970	427	436	Chain A, The Structure Of A Tau Class Glutathione S-Transferase From Wheat, Active In Herbicide Detoxification>gi|21730249|pdb|1GWC|B Chain B, The Structure Of A Tau Class Glutathione S-Transferase From Wheat, Active In Herbicide Detoxification>gi|21730250|pdb|1GWC|C Chain C, The Structure Of A Tau Class Glutathione S-Transferase From Wheat, Active In Herbicide Detoxification>gi|2190992|gb|AAD101…
TRIAE_CS42_1AL_TGACv1_000085_AA0002790	39	33	26	170	120	133	63	51	40	consensus disorder prediction
TRIAE_CS42_1AL_TGACv1_000153_AA0004910	4	1	4	27	27	21	1	5	2	consensus disorder prediction
TRIAE_CS42_1AL_TGACv1_000158_AA0005040	452	116	200	1297	1102	1020	542	763	944	consensus disorder prediction
TRIAE_CS42_1AL_TGACv1_000165_AA0005190	24	21	20	174	51	101	29	20	30	NB-ARC
TRIAE_CS42_1AL_TGACv1_000222_AA0006610	524	504	420	2723	1600	2168	856	444	433	consensus disorder prediction
TRIAE_CS42_1AL_TGACv1_000265_AA0007680	37	59	45	399	338	363	170	158	127	LPLAT_MGAT-like
TRIAE_CS42_1AL_TGACv1_000306_AA0008480	199	134	216	1095	720	806	427	352	370	consensus disorder prediction
TRIAE_CS42_1AL_TGACv1_000360_AA0009990	6	4	6	28	30	22	17	8	14	Tesmin/TSO1-like CXC domain
TRIAE_CS42_1AL_TGACv1_000361_AA0010050	14	5	19	185	188	191	25	10	8	#N/A
TRIAE_CS42_1AL_TGACv1_000398_AA0011100	81	39	88	573	170	267	35	43	64	Alpha/Beta hydrolase fold
TRIAE_CS42_1AL_TGACv1_000494_AA0013470	0	0	1	44	19	11	1	0	0	Peroxidases heam-ligand binding site
TRIAE_CS42_1AL_TGACv1_000494_AA0013480	0	0	3	17	6	12	1	0	1	Haem peroxidase, plant/fungal/bacterial
TRIAE_CS42_1AL_TGACv1_000504_AA0013540	88	68	105	741	495	544	142	98	80	#N/A
TRIAE_CS42_1AL_TGACv1_000509_AA0013590	1	4	0	31	19	41	3	4	4	Pyridoxal-phosphate binding site
TRIAE_CS42_1AL_TGACv1_000532_AA0014050	5	3	2	41	25	18	6	2	2	ZnF_GATA
TRIAE_CS42_1AL_TGACv1_000582_AA0015140	8	1	7	131	76	98	6	4	4	Voltage-dependent anion channel
TRIAE_CS42_1AL_TGACv1_000582_AA0015150	5	3	0	131	41	48	23	9	5	TDT_SLAC1_like
TRIAE_CS42_1AL_TGACv1_000591_AA0015400	229	196	277	2362	1996	2092	554	362	304	#N/A
TRIAE_CS42_1AL_TGACv1_000619_AA0015990	108	48	76	5589	2912	3823	165	85	121	#N/A
TRIAE_CS42_1AL_TGACv1_000619_AA0016000	13	2	6	1071	609	684	4	2	1	F-box domain
TRIAE_CS42_1AL_TGACv1_000644_AA0016380	15	3	8	187	133	166	16	22	16	#N/A
TRIAE_CS42_1AL_TGACv1_000668_AA0016690	1	0	1	71	104	40	5	0	9	#N/A
TRIAE_CS42_1AL_TGACv1_000668_AA0016720	47	2	6	238	429	288	30	19	103	#N/A
TRIAE_CS42_1AL_TGACv1_000668_AA0016740	8	2	1	125	212	131	6	6	32	#N/A
TRIAE_CS42_1AL_TGACv1_000694_AA0017160	0	5	4	20	18	14	17	9	7	#N/A
TRIAE_CS42_1AL_TGACv1_000696_AA0017290	46	67	70	554	127	258	741	199	203	#N/A
TRIAE_CS42_1AL_TGACv1_000725_AA0017980	88	112	98	583	387	434	393	222	195	GST_N_Tau
TRIAE_CS42_1AL_TGACv1_000794_AA0019270	2	1	0	27	18	35	5	1	5	Protein kinase-like domain
TRIAE_CS42_1AL_TGACv1_000900_AA0021420	2	0	0	47	27	25	24	2	3	LOG family
TRIAE_CS42_1AL_TGACv1_000988_AA0023260	6	13	13	135	85	76	0	2	5	Fungal lipase-like domain
TRIAE_CS42_1AL_TGACv1_001026_AA0023650	135	68	103	14225	7198	10342	228	153	167	P-loop containing nucleoside triphosphate hydrolase
TRIAE_CS42_1AL_TGACv1_001026_AA0023660	6	2	3	1908	1258	1095	11	16	10	ATPase, AAA-type, conserved site
TRIAE_CS42_1AL_TGACv1_001026_AA0023670	51	34	54	8345	4401	5507	158	59	69	ATPase, AAA-type, conserved site
TRIAE_CS42_1AL_TGACv1_001026_AA0023680	23	11	17	3033	2099	2393	56	32	36	P-loop containing nucleoside triphosphate hydrolase
TRIAE_CS42_1AL_TGACv1_001085_AA0024680	4	4	6	63	39	38	5	5	3	#N/A
TRIAE_CS42_1AL_TGACv1_001153_AA0026120	6	1	2	16	18	18	4	3	0	#N/A
TRIAE_CS42_1AL_TGACv1_001291_AA0028350	90	9	32	1314	566	846	107	149	322	#N/A
TRIAE_CS42_1AL_TGACv1_001291_AA0028360	13	2	14	343	138	226	32	16	44	Protein kinase domain
TRIAE_CS42_1AL_TGACv1_001381_AA0029640	74	85	75	619	410	353	183	161	108	Zinc finger, Dof-type
TRIAE_CS42_1AL_TGACv1_001517_AA0031620	0	0	0	11	4	6	3	0	0	Protein of unknown function DUF810
TRIAE_CS42_1AL_TGACv1_001560_AA0032280	158	139	181	1228	734	1078	303	214	232	consensus disorder prediction
TRIAE_CS42_1AL_TGACv1_001628_AA0033170	0	0	0	8	5	6	0	0	0	consensus disorder prediction
TRIAE_CS42_1AL_TGACv1_001637_AA0033280	6	1	10	69	147	68	583	20	11	Helicase, C-terminal
TRIAE_CS42_1AL_TGACv1_001652_AA0033600	1195	1104	1213	8199	6828	8830	2109	2039	1442	consensus disorder prediction
TRIAE_CS42_1AL_TGACv1_001862_AA0035990	21	31	24	177	91	169	241	33	47	haloacid dehalogenase-like hydrolase
TRIAE_CS42_1AL_TGACv1_001903_AA0036460	1	1	2	41	35	31	5	2	1	TDT_SLAC1_like
TRIAE_CS42_1AL_TGACv1_001969_AA0037330	1	2	1	40	41	23	15	2	4	#N/A
TRIAE_CS42_1AL_TGACv1_002004_AA0037690	285	232	213	1580	762	1205	322	208	181	Protein kinase-like domain
TRIAE_CS42_1AL_TGACv1_002051_AA0038150	6	3	3	186	85	89	107	20	4	WRKY domain
TRIAE_CS42_1AL_TGACv1_002144_AA0039090	12	14	12	115	99	105	4	0	0	Protein of unknown function DUF241, plant
TRIAE_CS42_1AL_TGACv1_002176_AA0039480	0	0	2	113	155	113	5	1	1	consensus disorder prediction
TRIAE_CS42_1AL_TGACv1_002245_AA0040020	328	214	352	1845	958	1270	388	112	235	Cytochrome P450
TRIAE_CS42_1AL_TGACv1_002296_AA0040640	48	77	68	1025	678	688	37	43	50	Homeodomain-like
TRIAE_CS42_1AL_TGACv1_002296_AA0040650	33	50	48	308	163	190	44	84	68	Homeodomain-like
TRIAE_CS42_1AL_TGACv1_002343_AA0041030	0	1	0	31	8	7	7	0	0	AP2/ERF domain
TRIAE_CS42_1AL_TGACv1_002367_AA0041240	0	0	1	33	24	4	16	2	0	FAD/NAD(P)-binding domain
TRIAE_CS42_1AL_TGACv1_002432_AA0041870	66	59	66	803	364	440	149	120	160	#N/A
TRIAE_CS42_1AL_TGACv1_002432_AA0041900	756	707	633	4321	2728	3635	1902	1420	1397	AP2/ERF domain
TRIAE_CS42_1AL_TGACv1_002524_AA0042830	3	2	1	18	13	15	6	2	5	Protein kinase domain
TRIAE_CS42_1AL_TGACv1_002630_AA0043970	2	1	3	24	8	16	0	0	0	consensus disorder prediction
TRIAE_CS42_1AL_TGACv1_002674_AA0044350	267	203	321	1864	1213	1423	318	339	400	CBS domain
TRIAE_CS42_1AL_TGACv1_002725_AA0044760	17	12	17	71	76	62	22	26	18	WRKY domain
TRIAE_CS42_1AL_TGACv1_002725_AA0044780	12	11	10	120	182	77	23	23	15	WRKY domain
TRIAE_CS42_1AL_TGACv1_002856_AA0045590	9	27	24	107	100	89	48	40	26	consensus disorder prediction
TRIAE_CS42_1AL_TGACv1_002900_AA0046040	138	160	166	1037	633	684	519	426	376	Zinc finger, Dof-type
TRIAE_CS42_1AL_TGACv1_002916_AA0046300	0	0	0	6	15	19	2	1	1	Sucrose synthase
TRIAE_CS42_1AL_TGACv1_002968_AA0046780	5	5	4	30	19	16	3	0	0	#N/A
TRIAE_CS42_1AL_TGACv1_003051_AA0047310	27	24	26	135	204	148	50	48	26	consensus disorder prediction
TRIAE_CS42_1AL_TGACv1_003124_AA0048030	297	268	243	3960	3623	3712	475	460	365	Heat shock factor (HSF)-type, DNA-binding
TRIAE_CS42_1AL_TGACv1_003210_AA0048680	172	214	427	4679	2406	3165	1250	413	609	consensus disorder prediction
TRIAE_CS42_1AL_TGACv1_003346_AA0049260	8	25	13	101	40	70	26	35	8	consensus disorder prediction
TRIAE_CS42_1AL_TGACv1_003384_AA0049460	47	51	40	631	360	526	173	97	81	Thioredoxin-like fold
TRIAE_CS42_1AL_TGACv1_003535_AA0050290	1	0	1	44	12	21	0	0	0	consensus disorder prediction
TRIAE_CS42_1AL_TGACv1_003747_AA0051340	1169	1304	1426	14706	7135	11281	5157	1963	2329	Cytochrome P450, conserved site
TRIAE_CS42_1AL_TGACv1_003853_AA0051750	5	22	17	90	66	79	52	27	25	consensus disorder prediction
TRIAE_CS42_1AL_TGACv1_003895_AA0051880	0	3	1	685	453	710	103	2	5	consensus disorder prediction
TRIAE_CS42_1AL_TGACv1_004134_AA0052540	53	60	40	485	270	384	115	57	60	CcmE/CycJ protein
TRIAE_CS42_1AL_TGACv1_004153_AA0052620	163	122	98	1099	593	692	242	154	215	Alpha/beta hydrolase fold-1
TRIAE_CS42_1AL_TGACv1_004495_AA0053680	155	123	149	4892	3629	4285	515	219	337	Cysteine-tRNA ligase
TRIAE_CS42_1AS_TGACv1_019036_AA0058530	13	17	12	145	163	141	10	20	19	Glutathione S-transferase, C-terminal-like
TRIAE_CS42_1AS_TGACv1_019043_AA0058850	436	10	58	1033	867	668	34	21	118	consensus disorder prediction
TRIAE_CS42_1AS_TGACv1_019089_AA0060420	0	1	0	16	9	14	0	0	2	NB-ARC
TRIAE_CS42_1AS_TGACv1_019182_AA0062370	61	60	89	742	428	877	96	103	116	consensus disorder prediction
TRIAE_CS42_1AS_TGACv1_019295_AA0064470	0	0	0	135	108	105	3	1	1	Myb domain, plants
TRIAE_CS42_1AS_TGACv1_019317_AA0064810	5	6	10	59	37	55	43	14	17	GST_C_Phi
TRIAE_CS42_1AS_TGACv1_019404_AA0066200	7	21	20	86	75	70	41	43	31	RT_nLTR_like
TRIAE_CS42_1AS_TGACv1_019480_AA0067170	1	6	0	14	17	8	5	4	4	HLH
TRIAE_CS42_1AS_TGACv1_019501_AA0067410	4449	3748	4662	25923	17335	21113	5563	3328	3274	Malic enzyme, NAD-binding
TRIAE_CS42_1AS_TGACv1_019551_AA0068090	19	19	16	190	258	232	11	7	2	Aldolase-type TIM barrel
TRIAE_CS42_1AS_TGACv1_019570_AA0068550	518	336	388	10400	6863	7786	1303	679	955	WRKY domain
TRIAE_CS42_1AS_TGACv1_019676_AA0069770	208	158	141	1062	1014	993	710	445	484	WD40 repeat
TRIAE_CS42_1AS_TGACv1_019685_AA0069860	73	77	57	1753	541	830	264	62	57	Non-haem dioxygenase N-terminal domain
TRIAE_CS42_1AS_TGACv1_019716_AA0070510	86	42	33	889	466	748	264	138	136	Fumarase/histidase, N-terminal
TRIAE_CS42_1AS_TGACv1_019880_AA0072370	72	57	55	505	228	416	246	80	108	consensus disorder prediction
TRIAE_CS42_1AS_TGACv1_020112_AA0074810	3	2	4	22	16	14	2	2	0	#N/A
TRIAE_CS42_1AS_TGACv1_020114_AA0074820	102	149	91	1302	587	756	507	154	160	#N/A
TRIAE_CS42_1AS_TGACv1_020114_AA0074830	0	0	0	23	8	10	1	0	1	G-patch domain
TRIAE_CS42_1AS_TGACv1_020251_AA0076000	548	336	510	2835	2039	2362	499	405	340	consensus disorder prediction
TRIAE_CS42_1AS_TGACv1_020340_AA0076790	127	69	177	1054	175	867	166	170	343	Haem peroxidase
TRIAE_CS42_1AS_TGACv1_020422_AA0077450	0	2	0	27	17	8	12	5	3	SGNH hydrolase-type esterase domain
TRIAE_CS42_1AS_TGACv1_020449_AA0077560	89	38	142	1498	184	897	167	52	118	Haem peroxidase
TRIAE_CS42_1AS_TGACv1_020459_AA0077630	303	352	442	2929	588	1894	897	318	665	Secretory peroxidase
TRIAE_CS42_1AS_TGACv1_020683_AA0079260	22	10	44	229	93	158	46	19	38	Secretory peroxidase
TRIAE_CS42_1AS_TGACv1_020792_AA0079870	1941	1738	1834	12955	6176	9800	3404	2767	3177	P-type ATPase
TRIAE_CS42_1AS_TGACv1_020889_AA0080370	10	5	14	55	50	75	9	8	8	#N/A
TRIAE_CS42_1BL_TGACv1_030266_AA0084590	23	0	2	90	98	76	10	2	35	consensus disorder prediction
TRIAE_CS42_1BL_TGACv1_030277_AA0084960	21	14	20	114	132	92	58	22	23	consensus disorder prediction
TRIAE_CS42_1BL_TGACv1_030290_AA0085600	4	3	7	25	28	20	10	3	4	Phosphatidylinositol N-acetylglucosaminyltransferase subunit Y
TRIAE_CS42_1BL_TGACv1_030290_AA0085610	2	3	5	1470	1336	1253	13	3	2	#N/A
TRIAE_CS42_1BL_TGACv1_030300_AA0085930	34	47	30	1337	301	592	75	20	31	Zinc finger, RING/FYVE/PHD-type
TRIAE_CS42_1BL_TGACv1_030373_AA0088390	86	77	123	711	670	757	289	247	245	Glycosyl transferase, family 14
TRIAE_CS42_1BL_TGACv1_030390_AA0089250	108	98	105	610	400	487	125	125	133	consensus disorder prediction
TRIAE_CS42_1BL_TGACv1_030417_AA0090090	18	17	20	123	72	76	38	18	21	Zinc finger, RING-type
TRIAE_CS42_1BL_TGACv1_030482_AA0092100	259	163	275	1848	1057	1449	609	144	291	Cytochrome P450
TRIAE_CS42_1BL_TGACv1_030496_AA0092320	66	55	65	518	242	372	134	130	65	Pectinesterase inhibitor domain
TRIAE_CS42_1BL_TGACv1_030514_AA0092940	1	1	0	8	15	9	2	3	3	Reverse transcriptase zinc-binding domain
TRIAE_CS42_1BL_TGACv1_030570_AA0094320	88	110	103	2143	1389	1754	53	38	46	Aminoacyl-tRNA synthetase, class Ia, anticodon-binding
TRIAE_CS42_1BL_TGACv1_030633_AA0096450	3	4	6	23	30	14	5	8	1	Protein kinase-like domain
TRIAE_CS42_1BL_TGACv1_030669_AA0097440	18	6	21	146	161	154	36	65	38	consensus disorder prediction
TRIAE_CS42_1BL_TGACv1_030678_AA0097680	25	12	18	182	62	95	2	2	0	Peroxidases heam-ligand binding site
TRIAE_CS42_1BL_TGACv1_030683_AA0097870	99	61	65	2169	1012	1472	109	16	50	F-box domain
TRIAE_CS42_1BL_TGACv1_030734_AA0099370	79	76	67	776	364	516	267	120	110	consensus disorder prediction
TRIAE_CS42_1BL_TGACv1_030848_AA0102220	1	6	2	25	20	27	4	9	6	CCT domain
TRIAE_CS42_1BL_TGACv1_030850_AA0102270	2	1	3	10	10	14	4	1	2	Zinc finger, LIM-type
TRIAE_CS42_1BL_TGACv1_030930_AA0103950	742	763	761	4447	2669	4110	2667	1117	1365	Thioredoxin-like fold
TRIAE_CS42_1BL_TGACv1_031025_AA0106050	148	178	289	1376	814	994	576	264	355	NAD(P)-binding domain
TRIAE_CS42_1BL_TGACv1_031097_AA0107550	158	102	103	866	259	610	160	139	207	Nucleotide-diphospho-sugar transferases
TRIAE_CS42_1BL_TGACv1_031101_AA0107730	83	78	95	403	302	394	111	114	82	#N/A
TRIAE_CS42_1BL_TGACv1_031152_AA0108780	211	102	172	1872	1276	1424	373	159	155	#N/A
TRIAE_CS42_1BL_TGACv1_031170_AA0109090	43	41	43	374	127	177	60	22	33	Multi antimicrobial extrusion protein
TRIAE_CS42_1BL_TGACv1_031186_AA0109330	193	194	223	1331	1089	1119	631	559	530	Glutathione S-transferase, N-terminal
TRIAE_CS42_1BL_TGACv1_031218_AA0109790	3	0	6	33	38	16	93	3	1	DEXDc
TRIAE_CS42_1BL_TGACv1_031218_AA0109800	0	1	1	12	13	4	49	1	3	consensus disorder prediction
TRIAE_CS42_1BL_TGACv1_031241_AA0110230	47	27	29	391	137	150	304	93	79	WRKY domain
TRIAE_CS42_1BL_TGACv1_031393_AA0113050	5	7	0	91	39	60	90	28	14	Concanavalin A-like lectin/glucanase domain
TRIAE_CS42_1BL_TGACv1_031407_AA0113400	1745	1913	2090	20661	13526	16802	9210	3913	5003	Cytochrome P450, conserved site
TRIAE_CS42_1BL_TGACv1_031415_AA0113550	12	1	3	91	39	65	5	7	5	consensus disorder prediction
TRIAE_CS42_1BL_TGACv1_031547_AA0115860	2	11	2	27	24	28	6	2	0	consensus disorder prediction
TRIAE_CS42_1BL_TGACv1_031569_AA0116310	4	4	9	35	28	38	13	22	14	Protein of unknown function DUF4228, plant
TRIAE_CS42_1BL_TGACv1_031571_AA0116350	97	60	107	930	492	383	9	5	7	NOX_Duox_like_FAD_NADP
TRIAE_CS42_1BL_TGACv1_031589_AA0116600	467	424	461	4918	3327	4026	1228	810	734	Chaperone DnaJ, C-terminal
TRIAE_CS42_1BL_TGACv1_031655_AA0118060	614	671	524	3417	2155	2556	904	523	465	NMD3
TRIAE_CS42_1BL_TGACv1_031678_AA0118640	1	1	1	12	12	4	3	2	6	Pre-mRNA-splicing factor 38
TRIAE_CS42_1BL_TGACv1_031713_AA0119490	755	790	711	4358	2626	3573	1366	1093	1151	AP2/ERF domain
TRIAE_CS42_1BL_TGACv1_031790_AA0120610	1465	1119	2142	11094	7635	10314	2529	2438	1666	Cytochrome P450, conserved site
TRIAE_CS42_1BL_TGACv1_031850_AA0121710	2723	2824	3057	17024	13537	17155	5561	5648	4522	Nitrite/Sulfite reductase ferredoxin-like domain
TRIAE_CS42_1BL_TGACv1_031860_AA0121880	1	5	1	23	10	16	17	9	6	The fantastic four family
TRIAE_CS42_1BL_TGACv1_031863_AA0121910	65	48	54	437	144	439	177	86	114	consensus disorder prediction
TRIAE_CS42_1BL_TGACv1_031955_AA0123430	6	9	3	852	370	658	43	9	17	Cysteinyl-tRNA synthetase/mycothiol ligase
TRIAE_CS42_1BL_TGACv1_032016_AA0124230	33	27	24	350	176	229	27	24	11	Alpha/Beta hydrolase fold
TRIAE_CS42_1BL_TGACv1_032219_AA0126980	9	3	1	21	17	17	16	4	15	Jacalin-like lectin domain
TRIAE_CS42_1BL_TGACv1_032241_AA0127300	14	5	13	150	113	118	8	23	8	#N/A
TRIAE_CS42_1BL_TGACv1_032262_AA0127620	3	1	1	10	15	14	0	4	0	consensus disorder prediction
TRIAE_CS42_1BL_TGACv1_032269_AA0127730	2	2	3	27	25	19	8	5	0	Dual specificity phosphatase, catalytic domain
TRIAE_CS42_1BL_TGACv1_032287_AA0128020	139	102	246	1035	535	806	525	385	407	Xylanase inhibitor, N-terminal
TRIAE_CS42_1BL_TGACv1_032451_AA0130060	1	2	0	17	28	11	2	2	0	#N/A
TRIAE_CS42_1BL_TGACv1_032549_AA0131320	210	248	272	1652	1015	1371	572	399	429	Zinc finger, C3HC4 type (RING finger)
TRIAE_CS42_1BL_TGACv1_032588_AA0131720	15	13	17	276	79	158	18	13	3	Alpha/beta hydrolase fold-3
TRIAE_CS42_1BL_TGACv1_032669_AA0132640	39	62	42	327	212	254	101	75	53	#N/A
TRIAE_CS42_1BL_TGACv1_032766_AA0133950	737	281	508	2765	2080	1945	1067	1100	1198	consensus disorder prediction
TRIAE_CS42_1BL_TGACv1_032814_AA0134350	37	6	10	110	75	69	19	2	5	DNA-binding domain
TRIAE_CS42_1BL_TGACv1_032872_AA0134940	14	22	17	120	76	45	14	11	15	#N/A
TRIAE_CS42_1BL_TGACv1_032872_AA0134970	26	12	11	109	53	65	39	17	11	Prenylated rab acceptor PRA1
TRIAE_CS42_1BL_TGACv1_032899_AA0135220	25	15	17	806	566	574	63	18	30	Prokaryotic membrane lipoprotein lipid attachment site profile.
TRIAE_CS42_1BL_TGACv1_032966_AA0135850	3	3	5	78	61	57	1	1	7	Alpha/Beta hydrolase fold
TRIAE_CS42_1BL_TGACv1_032984_AA0136020	47	63	140	2709	1069	1730	165	59	89	ATPase, AAA-type, core
TRIAE_CS42_1BL_TGACv1_033176_AA0137550	0	0	0	6	9	4	2	0	0	#N/A
TRIAE_CS42_1BL_TGACv1_033429_AA0139390	299	248	241	1839	839	1398	394	267	370	#N/A
TRIAE_CS42_1BL_TGACv1_033796_AA0142110	77	74	75	603	408	739	96	70	86	Plant methyltransferase dimerisation
TRIAE_CS42_1BL_TGACv1_033888_AA0142510	163	131	131	4623	1796	3005	323	192	158	ATPase, AAA-type, core
TRIAE_CS42_1BL_TGACv1_033888_AA0142520	21	22	32	8645	4494	4572	195	50	47	ATPase, AAA-type, core
TRIAE_CS42_1BL_TGACv1_034035_AA0143170	0	1	0	10	7	7	4	2	1	#N/A
TRIAE_CS42_1BL_TGACv1_034151_AA0143640	199	131	191	1514	887	1081	261	208	206	HAD-superfamily hydrolase, subfamily IIB
TRIAE_CS42_1BL_TGACv1_034218_AA0143810	0	0	0	42	30	39	0	1	0	consensus disorder prediction
TRIAE_CS42_1BL_TGACv1_034262_AA0144000	56	32	28	319	110	167	71	67	79	consensus disorder prediction
TRIAE_CS42_1BL_TGACv1_034386_AA0144360	129	128	99	834	732	666	70	67	61	consensus disorder prediction
TRIAE_CS42_1BL_TGACv1_034437_AA0144510	17	2	5	154	74	94	14	17	3	consensus disorder prediction
TRIAE_CS42_1BL_TGACv1_035378_AA0146540	10	6	4	148	82	113	3	2	1	Protein of unknown function DUF241, plant
TRIAE_CS42_1BL_TGACv1_036899_AA0147510	7	1	4	18	21	14	6	3	3	#N/A
TRIAE_CS42_1BL_TGACv1_038611_AA0148010	179	167	194	1175	634	1581	308	142	207	Plant methyltransferase dimerisation
TRIAE_CS42_1BL_TGACv1_039046_AA0148100	424	164	363	4616	2554	2020	8	27	35	Peroxidases heam-ligand binding site
TRIAE_CS42_1BL_TGACv1_039922_AA0148280	51	22	18	772	429	367	9	3	16	Peroxidases heam-ligand binding site
TRIAE_CS42_1BL_TGACv1_041773_AA0148600	323	318	280	3347	1802	3647	598	286	392	#N/A
TRIAE_CS42_1BL_TGACv1_046447_AA0149120	7	2	5	36	18	43	11	3	7	S-adenosyl-L-methionine-dependent methyltransferase
TRIAE_CS42_1BL_TGACv1_726346_AA2170290	74	67	63	583	323	651	130	61	79	S-adenosyl-L-methionine-dependent methyltransferase
TRIAE_CS42_1BS_TGACv1_049540_AA0156160	39	31	31	262	65	175	60	49	65	Haem peroxidase, plant/fungal/bacterial
TRIAE_CS42_1BS_TGACv1_049829_AA0162290	0	0	0	0	15	16	0	0	0	CS domain
TRIAE_CS42_1BS_TGACv1_049914_AA0164150	7	8	9	262	135	209	58	13	11	Phenylalanine ammonia-lyase, shielding domain
TRIAE_CS42_1BS_TGACv1_049914_AA0164170	16	2	5	151	60	109	27	5	9	Phenylalanine ammonia-lyase, shielding domain
TRIAE_CS42_1BS_TGACv1_049924_AA0164400	127	122	168	963	541	685	75	48	55	Thioredoxin-like fold
TRIAE_CS42_1BS_TGACv1_049952_AA0164700	15	17	33	66	145	141	9	22	3	#N/A
TRIAE_CS42_1BS_TGACv1_049965_AA0164870	5	8	3	64	33	109	25	6	20	Fumarase/histidase, N-terminal
TRIAE_CS42_1BS_TGACv1_050068_AA0166910	1	2	3	17	11	14	5	1	4	consensus disorder prediction
TRIAE_CS42_1BS_TGACv1_050118_AA0167600	2	1	1	9	5	15	3	0	5	consensus disorder prediction
TRIAE_CS42_1BS_TGACv1_050237_AA0169430	0	1	0	8	23	9	1	0	1	Myb domain
TRIAE_CS42_1BS_TGACv1_050442_AA0172070	12	12	10	89	67	72	47	8	8	#N/A
TRIAE_CS42_1BS_TGACv1_050459_AA0172380	0	3	3	39	41	32	2	4	1	Thioredoxin-like fold
TRIAE_CS42_1BS_TGACv1_050467_AA0172460	50	58	84	476	146	325	223	109	143	ENTH/VHS
TRIAE_CS42_1BS_TGACv1_050538_AA0173160	261	264	233	1428	712	1465	469	345	428	#N/A
TRIAE_CS42_1BS_TGACv1_050671_AA0174330	789	558	1080	3770	3341	3836	2285	2328	2455	#N/A
TRIAE_CS42_1BS_TGACv1_050729_AA0174830	14	8	2	172	99	306	36	7	4	L-Aspartase-like
TRIAE_CS42_1BS_TGACv1_050776_AA0175370	22	13	10	91	75	86	63	40	33	consensus disorder prediction
TRIAE_CS42_1BS_TGACv1_050830_AA0175980	8	5	6	17	29	39	4	10	8	Peptidase S59, nucleoporin
TRIAE_CS42_1BS_TGACv1_050906_AA0176590	5	7	1	102	162	319	4	6	17	consensus disorder prediction
TRIAE_CS42_1BS_TGACv1_051029_AA0177320	4	7	6	66	22	81	16	6	15	Aromatic amino acid lyase
TRIAE_CS42_1BS_TGACv1_051121_AA0177900	3	2	6	45	23	29	35	6	9	Concanavalin A-like lectin/glucanase domain
TRIAE_CS42_1BS_TGACv1_051537_AA0180290	17	6	10	87	87	124	12	15	16	Serine-threonine/tyrosine-protein kinase catalytic domain
TRIAE_CS42_1DL_TGACv1_061085_AA0184560	260	171	190	1628	712	1218	124	118	139	consensus disorder prediction
TRIAE_CS42_1DL_TGACv1_061096_AA0185030	559	497	541	7497	5022	5770	1061	724	684	consensus disorder prediction
TRIAE_CS42_1DL_TGACv1_061101_AA0185260	157	167	165	1761	1159	1379	419	316	353	Trehalose-phosphatase
TRIAE_CS42_1DL_TGACv1_061112_AA0185790	14	11	13	105	90	71	1	6	15	Alpha/Beta hydrolase fold
TRIAE_CS42_1DL_TGACv1_061182_AA0188050	30	14	24	4186	2423	3147	95	12	19	#N/A
TRIAE_CS42_1DL_TGACv1_061195_AA0188480	84	37	91	564	395	430	5	31	32	NADPH oxidase Respiratory burst
TRIAE_CS42_1DL_TGACv1_061202_AA0188570	2	3	2	24	6	16	1	0	0	Leucine-rich repeat, typical subtype
TRIAE_CS42_1DL_TGACv1_061203_AA0188720	44	24	32	588	411	453	79	62	57	#N/A
TRIAE_CS42_1DL_TGACv1_061213_AA0189050	7	5	7	405	330	325	21	4	9	Prokaryotic membrane lipoprotein lipid attachment site profile.
TRIAE_CS42_1DL_TGACv1_061246_AA0189850	3	0	0	18	8	8	2	1	5	RlpA-like protein, double-psi beta-barrel domain
TRIAE_CS42_1DL_TGACv1_061262_AA0190390	3	5	7	62	69	71	8	27	17	consensus disorder prediction
TRIAE_CS42_1DL_TGACv1_061266_AA0190530	0	1	0	7	10	13	4	1	5	Inorganic pyrophosphatase
TRIAE_CS42_1DL_TGACv1_061266_AA0190560	1346	955	1353	11692	5619	8854	1856	1035	1168	ABC transporter-like
TRIAE_CS42_1DL_TGACv1_061273_AA0190810	0	3	0	13	5	9	2	0	0	Protein kinase domain
TRIAE_CS42_1DL_TGACv1_061281_AA0191170	80	49	69	430	322	335	99	72	67	F-box domain
TRIAE_CS42_1DL_TGACv1_061299_AA0191710	69	108	107	986	437	524	109	75	57	Zinc finger, Dof-type
TRIAE_CS42_1DL_TGACv1_061304_AA0191880	3	11	5	51	17	32	20	2	11	LOG family
TRIAE_CS42_1DL_TGACv1_061314_AA0192280	70	65	70	439	219	264	88	71	54	#N/A
TRIAE_CS42_1DL_TGACv1_061349_AA0192830	381	305	201	2734	1863	1950	871	879	1188	Alpha/Beta hydrolase fold
TRIAE_CS42_1DL_TGACv1_061355_AA0192920	5	8	4	265	209	183	8	3	1	Protein of unknown function DUF241, plant
TRIAE_CS42_1DL_TGACv1_061441_AA0195350	677	264	401	2639	2084	1979	739	676	788	consensus disorder prediction
TRIAE_CS42_1DL_TGACv1_061467_AA0196070	13	0	0	194	274	156	6	1	67	AP2/ERF domain
TRIAE_CS42_1DL_TGACv1_061472_AA0196240	176	130	222	1934	1297	1559	256	193	104	#N/A
TRIAE_CS42_1DL_TGACv1_061476_AA0196370	2597	2906	2994	15306	12140	15784	4227	3821	3071	#N/A
TRIAE_CS42_1DL_TGACv1_061579_AA0199110	271	224	202	3177	2929	2829	234	230	165	Winged helix-turn-helix DNA-binding domain
TRIAE_CS42_1DL_TGACv1_061589_AA0199260	4	10	2	23	24	23	8	2	3	PPM-type phosphatase, divalent cation binding
TRIAE_CS42_1DL_TGACv1_061625_AA0200320	2	4	10	63	34	31	8	11	7	Zinc finger, CCCH-type
TRIAE_CS42_1DL_TGACv1_061644_AA0200720	18	17	12	2668	1715	1847	10	3	10	ATPase, AAA-type, core
TRIAE_CS42_1DL_TGACv1_061644_AA0200750	11	2	5	3493	1790	1972	39	13	4	ATPase, AAA-type, conserved site
TRIAE_CS42_1DL_TGACv1_061644_AA0200760	195	163	204	9570	4477	6270	409	255	185	AAA-type ATPase, N-terminal domain
TRIAE_CS42_1DL_TGACv1_061647_AA0200910	446	382	575	6128	3552	5016	357	334	411	Methionyl/Valyl/Leucyl/Isoleucyl-tRNA synthetase, anticodon-binding
TRIAE_CS42_1DL_TGACv1_061654_AA0201150	3	3	1	67	23	29	7	3	0	Voltage-dependent anion channel
TRIAE_CS42_1DL_TGACv1_061663_AA0201260	24	8	17	230	137	107	18	18	10	#N/A
TRIAE_CS42_1DL_TGACv1_061663_AA0201290	38	18	27	256	146	170	32	52	35	consensus disorder prediction
TRIAE_CS42_1DL_TGACv1_061688_AA0201770	1	0	1	279	206	205	71	1	0	#N/A
TRIAE_CS42_1DL_TGACv1_061765_AA0203080	37	46	25	221	177	155	85	107	56	consensus disorder prediction
TRIAE_CS42_1DL_TGACv1_061859_AA0204470	36	65	64	328	185	232	302	96	121	Protein kinase, ATP binding site
TRIAE_CS42_1DL_TGACv1_061871_AA0205010	9	2	3	117	111	93	18	2	2	AP2/ERF domain
TRIAE_CS42_1DL_TGACv1_061939_AA0205980	549	556	539	3868	2260	2845	589	571	536	Copine
TRIAE_CS42_1DL_TGACv1_061940_AA0206010	17	11	13	78	57	46	25	25	38	consensus disorder prediction
TRIAE_CS42_1DL_TGACv1_061968_AA0206610	78	43	89	776	341	460	62	86	100	consensus disorder prediction
TRIAE_CS42_1DL_TGACv1_061972_AA0206670	167	204	200	1230	1131	941	131	93	73	Tetratricopeptide repeat
TRIAE_CS42_1DL_TGACv1_062032_AA0207790	201	149	228	1336	798	938	481	109	182	Cytochrome P450
TRIAE_CS42_1DL_TGACv1_062044_AA0207990	1	2	1	9	7	13	0	0	0	Potassium transporter
TRIAE_CS42_1DL_TGACv1_062121_AA0209040	51	32	36	953	728	547	28	36	30	Exonuclease, RNase T/DNA polymerase III
TRIAE_CS42_1DL_TGACv1_062121_AA0209050	13	6	6	298	207	251	18	16	6	#N/A
TRIAE_CS42_1DL_TGACv1_062222_AA0210760	32	37	44	211	182	186	48	58	66	Protein of unknown function DUF1645, plant
TRIAE_CS42_1DL_TGACv1_062276_AA0211780	2	0	1	58	31	49	14	2	3	consensus disorder prediction
TRIAE_CS42_1DL_TGACv1_062300_AA0212070	134	115	165	816	618	815	371	204	160	Glutathione S-transferase, C-terminal-like
TRIAE_CS42_1DL_TGACv1_062371_AA0213400	880	626	1258	12894	9695	12606	2380	2756	1817	Cytochrome P450, E-class, group I
TRIAE_CS42_1DL_TGACv1_062467_AA0214900	151	160	108	1096	693	862	989	224	227	Glutathione S-transferase, C-terminal-like
TRIAE_CS42_1DL_TGACv1_062487_AA0215130	3	4	3	2118	1239	1674	90	5	9	#N/A
TRIAE_CS42_1DL_TGACv1_062526_AA0215840	0	0	0	21	14	16	11	2	1	Ulp1 protease family, C-terminal catalytic domain
TRIAE_CS42_1DL_TGACv1_062736_AA0218950	9	1	4	174	225	164	5	2	67	DNA-binding domain
TRIAE_CS42_1DL_TGACv1_062736_AA0218970	47	0	4	262	444	295	21	6	90	consensus disorder prediction
TRIAE_CS42_1DL_TGACv1_062751_AA0219310	0	0	3	33	34	21	4	0	0	TDT_SLAC1_like
TRIAE_CS42_1DL_TGACv1_062754_AA0219410	1	10	2	26	10	24	23	5	3	#N/A
TRIAE_CS42_1DL_TGACv1_062789_AA0219970	3	7	6	32	54	25	8	5	10	RING
TRIAE_CS42_1DL_TGACv1_062801_AA0220160	601	556	539	3302	1985	2730	1126	904	912	AP2/ERF domain
TRIAE_CS42_1DL_TGACv1_062807_AA0220280	2	0	3	155	67	58	60	3	1	#N/A
TRIAE_CS42_1DL_TGACv1_062916_AA0221630	1507	1527	1780	12320	7131	10299	5075	1051	1122	Glutathione S-transferase, N-terminal
TRIAE_CS42_1DL_TGACv1_062916_AA0221640	98	102	90	660	405	592	148	62	61	Glutathione S-transferase, N-terminal
TRIAE_CS42_1DL_TGACv1_062962_AA0222290	11	2	7	71	82	44	6	4	5	consensus disorder prediction
TRIAE_CS42_1DL_TGACv1_063032_AA0223250	150	162	187	1327	806	1110	324	252	277	consensus disorder prediction
TRIAE_CS42_1DL_TGACv1_063064_AA0223510	0	3	3	410	210	365	65	5	8	AAA+ ATPase domain
TRIAE_CS42_1DL_TGACv1_063112_AA0224050	33	24	25	218	50	136	26	19	10	Membrane attack complex component/perforin (MACPF) domain
TRIAE_CS42_1DL_TGACv1_063151_AA0224440	19	11	15	326	289	257	17	31	19	Basic-leucine zipper domain
TRIAE_CS42_1DL_TGACv1_063317_AA0226240	7	6	3	76	62	35	106	15	21	Jacalin-like lectin domain
TRIAE_CS42_1DL_TGACv1_063317_AA0226270	3	1	5	136	100	86	14	2	10	Domain of unknown function DUF1618
TRIAE_CS42_1DL_TGACv1_063374_AA0226750	0	0	1	6	12	10	0	1	6	consensus disorder prediction
TRIAE_CS42_1DL_TGACv1_063879_AA0231420	1113	1247	1702	10611	5748	9107	8106	2169	2743	Cytochrome P450, conserved site
TRIAE_CS42_1DL_TGACv1_063962_AA0231970	4	0	1	34	26	18	0	0	1	Peroxidases heam-ligand binding site
TRIAE_CS42_1DL_TGACv1_064048_AA0232300	370	409	357	2301	1260	1531	423	216	233	Multi antimicrobial extrusion protein
TRIAE_CS42_1DL_TGACv1_064082_AA0232460	293	58	108	877	488	658	119	73	86	#N/A
TRIAE_CS42_1DL_TGACv1_064113_AA0232690	0	0	0	25	5	25	0	0	0	F-box domain
TRIAE_CS42_1DL_TGACv1_064143_AA0232860	915	591	919	7310	3043	5853	824	610	697	ABC transporter-like
TRIAE_CS42_1DL_TGACv1_064163_AA0233000	2	1	3	47	11	28	3	0	1	NAC domain
TRIAE_CS42_1DL_TGACv1_064175_AA0233080	15	9	30	150	163	152	39	45	45	Protein of unknown function DUF4228, plant
TRIAE_CS42_1DL_TGACv1_064248_AA0233500	1	3	0	20	9	19	0	0	2	Aromatic-L-amino-acid decarboxylase
TRIAE_CS42_1DL_TGACv1_064347_AA0234070	1	0	0	62	19	30	0	0	0	#N/A
TRIAE_CS42_1DL_TGACv1_064444_AA0234510	7	4	3	66	98	54	60	10	0	FAD dependent oxidoreductase
TRIAE_CS42_1DS_TGACv1_080107_AA0239320	38	31	23	975	326	791	153	29	40	Phenylalanine ammonia-lyase
TRIAE_CS42_1DS_TGACv1_080107_AA0239330	60	48	41	551	209	442	193	88	132	#N/A
TRIAE_CS42_1DS_TGACv1_080107_AA0239340	119	77	74	1483	429	1025	357	138	243	Fumarase/histidase, N-terminal
TRIAE_CS42_1DS_TGACv1_080107_AA0239360	373	252	199	6283	2494	4839	1009	194	255	Phenylalanine ammonia-lyase
TRIAE_CS42_1DS_TGACv1_080190_AA0242530	1833	1648	1741	15737	6864	13206	4258	3046	3347	P-type ATPase, cytoplasmic domain N
TRIAE_CS42_1DS_TGACv1_080190_AA0242540	66	57	46	484	215	448	87	43	109	Cytochrome P450
TRIAE_CS42_1DS_TGACv1_080209_AA0243170	770	468	668	10413	7212	8484	1771	1135	1509	consensus disorder prediction
TRIAE_CS42_1DS_TGACv1_080216_AA0243400	1280	976	1546	7674	3935	7230	1994	1132	1374	Malic enzyme, N-terminal domain
TRIAE_CS42_1DS_TGACv1_080270_AA0244820	38	39	31	883	620	760	60	60	37	Protein dehydration-induced 19, C-terminal
TRIAE_CS42_1DS_TGACv1_080400_AA0247400	1	0	1	8	7	8	0	2	3	#N/A
TRIAE_CS42_1DS_TGACv1_080417_AA0247570	26	28	19	220	105	128	52	52	37	GST_C_Phi
TRIAE_CS42_1DS_TGACv1_080417_AA0247590	73	82	74	581	257	435	122	84	153	Glutathione S-transferase, C-terminal-like
TRIAE_CS42_1DS_TGACv1_080446_AA0248180	54	24	33	683	725	590	103	103	54	NADH:flavin oxidoreductase/NADH oxidase, N-terminal
TRIAE_CS42_1DS_TGACv1_080451_AA0248270	34	39	21	202	127	211	125	27	35	consensus disorder prediction
TRIAE_CS42_1DS_TGACv1_080697_AA0252340	27	36	19	173	103	124	31	8	11	WRKY domain
TRIAE_CS42_1DS_TGACv1_080861_AA0254810	212	47	71	2813	1546	2178	411	77	89	Aromatic amino acid lyase
TRIAE_CS42_1DS_TGACv1_080951_AA0255960	52	12	69	397	196	214	83	29	49	Plant peroxidase
TRIAE_CS42_1DS_TGACv1_080951_AA0255990	9	12	10	230	145	152	17	21	12	consensus disorder prediction
TRIAE_CS42_1DS_TGACv1_081075_AA0257440	0	0	0	254	237	223	1	0	3	SANT
TRIAE_CS42_1DS_TGACv1_081079_AA0257520	53	52	41	645	281	525	132	90	127	Alpha/Beta hydrolase fold
TRIAE_CS42_1DS_TGACv1_081310_AA0259720	3	7	9	29	29	25	3	5	1	consensus disorder prediction
TRIAE_CS42_1DS_TGACv1_081312_AA0259740	3350	2676	1953	14017	10490	10209	3659	2306	2706	consensus disorder prediction
TRIAE_CS42_1DS_TGACv1_081323_AA0259860	97	46	59	1275	529	735	263	75	118	Protein kinase domain
TRIAE_CS42_1DS_TGACv1_081556_AA0261430	4	3	3	16	14	14	7	4	3	Ubiquitin-conjugating enzyme/RWD-like
TRIAE_CS42_1DS_TGACv1_081683_AA0262270	411	286	279	2883	1858	2030	394	293	332	consensus disorder prediction
TRIAE_CS42_1DS_TGACv1_081885_AA0263200	158	194	123	1079	391	731	463	121	132	#N/A
TRIAE_CS42_1DS_TGACv1_082067_AA0263700	0	2	1	12	7	12	0	2	2	consensus disorder prediction
TRIAE_CS42_1DS_TGACv1_082230_AA0264230	198	215	156	1832	528	986	463	119	165	#N/A
TRIAE_CS42_2AL_TGACv1_092905_AA0266710	370	363	295	2339	1344	1532	619	597	571	consensus disorder prediction
TRIAE_CS42_2AL_TGACv1_092910_AA0266810	2	1	0	21	12	8	0	0	2	#N/A
TRIAE_CS42_2AL_TGACv1_092910_AA0266830	10	16	20	1215	640	865	19	12	33	#N/A
TRIAE_CS42_2AL_TGACv1_092924_AA0267190	99	60	47	521	323	358	148	98	103	Protein kinase domain
TRIAE_CS42_2AL_TGACv1_092944_AA0267640	0	0	0	5	6	9	0	0	0	#N/A
TRIAE_CS42_2AL_TGACv1_092944_AA0267690	60	17	46	367	190	207	1	2	0	#N/A
TRIAE_CS42_2AL_TGACv1_092944_AA0267700	13	1	5	178	67	64	2	0	0	#N/A
TRIAE_CS42_2AL_TGACv1_092944_AA0267720	1	2	0	136	40	52	0	0	1	#N/A
TRIAE_CS42_2AL_TGACv1_092944_AA0267730	38	10	15	753	220	311	15	7	5	Heavy metal-associated domain, HMA
TRIAE_CS42_2AL_TGACv1_092986_AA0268690	377	304	922	19512	10910	13858	863	985	1130	Heavy metal-associated domain, HMA
TRIAE_CS42_2AL_TGACv1_092986_AA0268720	11	2	20	590	324	371	16	16	18	consensus disorder prediction
TRIAE_CS42_2AL_TGACv1_092986_AA0268740	114	226	182	2600	1582	1890	44	33	38	consensus disorder prediction
TRIAE_CS42_2AL_TGACv1_092997_AA0269100	16	16	9	131	42	77	20	11	19	consensus disorder prediction
TRIAE_CS42_2AL_TGACv1_093000_AA0269160	9	2	4	37	45	29	6	9	4	DNA-binding pseudobarrel domain
TRIAE_CS42_2AL_TGACv1_093055_AA0270740	4	1	1	21	18	12	8	2	7	#N/A
TRIAE_CS42_2AL_TGACv1_093125_AA0272690	10	17	7	97	135	119	44	7	4	Cytochrome P450, conserved site
TRIAE_CS42_2AL_TGACv1_093159_AA0273550	2	0	0	11	9	14	29	2	0	Protein kinase-like domain
TRIAE_CS42_2AL_TGACv1_093170_AA0274020	18	12	16	181	62	149	96	15	32	Concanavalin A-like lectin/glucanase domain
TRIAE_CS42_2AL_TGACv1_093194_AA0274680	87	86	42	1051	541	641	353	77	65	#N/A
TRIAE_CS42_2AL_TGACv1_093197_AA0274930	17	21	20	178	191	212	1339	81	147	Cytochrome P450
TRIAE_CS42_2AL_TGACv1_093215_AA0275240	1	2	2	164	89	85	8	0	3	SANT/Myb domain
TRIAE_CS42_2AL_TGACv1_093227_AA0275470	782	189	317	4900	2670	3379	526	192	406	Ribonuclease CAF1
TRIAE_CS42_2AL_TGACv1_093272_AA0276390	4	30	9	61	82	73	83	31	168	Oxoglutarate/iron-dependent dioxygenase
TRIAE_CS42_2AL_TGACv1_093300_AA0276970	22	8	28	272	117	179	32	5	9	consensus disorder prediction
TRIAE_CS42_2AL_TGACv1_093322_AA0277490	493	507	611	3271	2046	2796	724	754	777	consensus disorder prediction
TRIAE_CS42_2AL_TGACv1_093325_AA0277700	18	23	19	178	102	185	355	43	55	#N/A
TRIAE_CS42_2AL_TGACv1_093330_AA0277780	541	341	439	4870	2220	4506	1944	1132	1343	#N/A
TRIAE_CS42_2AL_TGACv1_093330_AA0277810	997	995	782	5992	3246	5173	1659	1267	1760	#N/A
TRIAE_CS42_2AL_TGACv1_093379_AA0278850	6	5	1	66	15	27	28	12	3	GRX_GRXh_1_2_like
TRIAE_CS42_2AL_TGACv1_093381_AA0278900	116	112	131	833	510	628	265	277	240	#N/A
TRIAE_CS42_2AL_TGACv1_093422_AA0279900	0	0	0	9	6	4	3	1	1	Helitron helicase-like domain
TRIAE_CS42_2AL_TGACv1_093569_AA0282720	26	31	66	284	213	232	21	15	22	Amino acid transporter, transmembrane domain
TRIAE_CS42_2AL_TGACv1_093585_AA0283190	69	54	66	383	318	296	102	90	77	#N/A
TRIAE_CS42_2AL_TGACv1_093592_AA0283330	18	31	24	314	144	221	8	17	15	SANT
TRIAE_CS42_2AL_TGACv1_093618_AA0283710	7	8	13	179	143	150	20	8	8	NAC domain
TRIAE_CS42_2AL_TGACv1_093624_AA0283900	546	959	864	12207	7714	8751	8833	797	873	AOX
TRIAE_CS42_2AL_TGACv1_093664_AA0284840	9	10	17	82	80	63	19	23	22	#N/A
TRIAE_CS42_2AL_TGACv1_093713_AA0285520	257	255	214	1059	1068	899	525	266	338	Cysteine-rich transmembrane CYSTM domain
TRIAE_CS42_2AL_TGACv1_093757_AA0286160	352	249	367	2868	2249	2435	407	202	242	Tetratricopeptide-like helical domain
TRIAE_CS42_2AL_TGACv1_093773_AA0286430	108	58	64	468	302	364	151	165	162	Late embryogenesis abundant protein, LEA-14
TRIAE_CS42_2AL_TGACv1_093791_AA0286760	57	58	69	322	248	318	92	79	68	Uncharacterised protein family UPF0503
TRIAE_CS42_2AL_TGACv1_093800_AA0287020	266	163	241	1470	989	1117	53	45	39	consensus disorder prediction
TRIAE_CS42_2AL_TGACv1_093803_AA0287050	13	16	16	81	69	64	14	12	13	consensus disorder prediction
TRIAE_CS42_2AL_TGACv1_093808_AA0287180	203	136	332	5511	3158	4484	237	157	162	#N/A
TRIAE_CS42_2AL_TGACv1_093808_AA0287220	126	109	121	881	737	752	222	96	173	consensus disorder prediction
TRIAE_CS42_2AL_TGACv1_093902_AA0288980	25	4	13	1552	605	949	49	7	11	Heavy metal-associated domain, HMA
TRIAE_CS42_2AL_TGACv1_093902_AA0288990	1	0	3	27	10	18	0	0	0	Heavy metal-associated domain, HMA
TRIAE_CS42_2AL_TGACv1_093911_AA0289230	67	46	65	3808	2374	2519	69	185	251	#N/A
TRIAE_CS42_2AL_TGACv1_093911_AA0289240	215	168	322	11427	6594	8538	524	310	286	consensus disorder prediction
TRIAE_CS42_2AL_TGACv1_093949_AA0289940	274	273	334	1776	1172	1453	301	295	336	SANT
TRIAE_CS42_2AL_TGACv1_093980_AA0290590	174	122	164	1512	1003	1175	462	325	427	Transcription factor GRAS
TRIAE_CS42_2AL_TGACv1_094002_AA0291010	1	0	0	69	64	49	2	1	0	Homeodomain-like
TRIAE_CS42_2AL_TGACv1_094039_AA0291530	38	23	22	175	132	109	36	26	20	Alpha-ketoglutarate-dependent dioxygenase AlkB-like
TRIAE_CS42_2AL_TGACv1_094081_AA0292300	54	93	56	768	612	629	154	133	152	Transcription factor, MADS-box
TRIAE_CS42_2AL_TGACv1_094212_AA0294380	14	13	6	250	193	126	28	25	24	Protein kinase domain
TRIAE_CS42_2AL_TGACv1_094336_AA0295990	30	20	13	174	169	157	47	10	16	consensus disorder prediction
TRIAE_CS42_2AL_TGACv1_094340_AA0296080	6	15	13	109	55	73	17	13	11	consensus disorder prediction
TRIAE_CS42_2AL_TGACv1_094341_AA0296120	665	605	585	3994	1756	2881	1965	1482	1493	Leucine-rich repeat domain, L domain-like
TRIAE_CS42_2AL_TGACv1_094436_AA0297550	1096	1094	1348	10310	6790	7659	3065	2826	2522	Lipoxygenase, plant
TRIAE_CS42_2AL_TGACv1_094444_AA0297600	453	147	397	3588	1597	2449	184	173	197	WRKY domain
TRIAE_CS42_2AL_TGACv1_094471_AA0298290	163	113	126	1106	335	759	352	49	67	Transferase
TRIAE_CS42_2AL_TGACv1_094480_AA0298540	4	7	14	77	80	44	15	11	23	Amino acid/polyamine transporter I
TRIAE_CS42_2AL_TGACv1_094549_AA0299530	1832	1621	2097	9325	7693	7799	1947	1241	1562	AP2/ERF domain
TRIAE_CS42_2AL_TGACv1_094636_AA0300940	58	11	57	298	342	261	6	17	25	Armadillo-like helical
TRIAE_CS42_2AL_TGACv1_094669_AA0301250	0	0	0	119	73	102	2	0	0	#N/A
TRIAE_CS42_2AL_TGACv1_094693_AA0301680	2	2	6	17	18	17	7	12	4	consensus disorder prediction
TRIAE_CS42_2AL_TGACv1_094713_AA0301970	1	4	2	10	19	30	13	3	4	Transketolase, N-terminal
TRIAE_CS42_2AL_TGACv1_094717_AA0302070	0	0	1	171	150	163	23	1	2	AOX
TRIAE_CS42_2AL_TGACv1_094824_AA0303680	1	0	0	7	7	9	4	3	10	Ribonuclease H-like domain
TRIAE_CS42_2AL_TGACv1_094864_AA0304160	341	297	347	1940	1012	1465	746	528	477	Argonaute, linker 1 domain
TRIAE_CS42_2AL_TGACv1_094969_AA0305350	93	98	131	8020	4598	5708	256	86	91	Multi antimicrobial extrusion protein
TRIAE_CS42_2AL_TGACv1_094969_AA0305370	170	164	167	1666	814	951	318	143	96	Multi antimicrobial extrusion protein
TRIAE_CS42_2AL_TGACv1_094976_AA0305470	5	5	13	90	42	60	33	19	17	Chloramphenicol acetyltransferase-like domain
TRIAE_CS42_2AL_TGACv1_095099_AA0306910	1	1	2	21	11	15	60	4	6	#N/A
TRIAE_CS42_2AL_TGACv1_095213_AA0308330	92	111	60	908	281	462	163	57	70	Protein kinase-like domain
TRIAE_CS42_2AL_TGACv1_095357_AA0309910	36	21	20	141	120	139	17	13	15	ABC transporter-like
TRIAE_CS42_2AL_TGACv1_095371_AA0310130	10	9	10	71	34	76	21	13	14	Mog1/PsbP, alpha/beta/alpha sandwich
TRIAE_CS42_2AL_TGACv1_095386_AA0310290	195	103	120	1898	751	1420	247	283	337	consensus disorder prediction
TRIAE_CS42_2AL_TGACv1_095469_AA0311210	4	1	0	21	9	15	8	4	1	#N/A
TRIAE_CS42_2AL_TGACv1_095504_AA0311680	233	172	140	1105	760	734	218	143	128	consensus disorder prediction
TRIAE_CS42_2AL_TGACv1_095506_AA0311710	279	65	160	1153	722	782	186	180	250	consensus disorder prediction
TRIAE_CS42_2AL_TGACv1_095550_AA0312040	0	0	0	33	28	13	1	4	1	Leucine-rich repeat domain, L domain-like
TRIAE_CS42_2AL_TGACv1_095599_AA0312630	0	0	0	5	6	9	2	1	0	PTR2 family proton/oligopeptide symporter, conserved site
TRIAE_CS42_2AL_TGACv1_095872_AA0315380	121	15	38	642	579	426	64	49	38	U box domain
TRIAE_CS42_2AL_TGACv1_095875_AA0315440	75	109	71	705	655	695	121	176	148	#N/A
TRIAE_CS42_2AL_TGACv1_095880_AA0315520	8	15	3	41	44	25	6	4	5	#N/A
TRIAE_CS42_2AL_TGACv1_095884_AA0315570	43	39	40	522	519	372	76	161	162	consensus disorder prediction
TRIAE_CS42_2AL_TGACv1_096168_AA0317560	0	0	0	3	9	6	0	0	0	#N/A
TRIAE_CS42_2AL_TGACv1_096244_AA0318180	189	173	169	3521	1912	2530	120	85	100	Indole-3-glycerol phosphate synthase
TRIAE_CS42_2AL_TGACv1_096364_AA0318930	58	58	39	280	249	276	46	20	20	consensus disorder prediction
TRIAE_CS42_2AL_TGACv1_096521_AA0319660	135	153	146	831	498	686	139	155	97	Myc-type, basic helix-loop-helix (bHLH) domain
TRIAE_CS42_2AL_TGACv1_096561_AA0319890	225	203	225	1145	813	1016	377	345	419	consensus disorder prediction
TRIAE_CS42_2AL_TGACv1_097152_AA0323200	0	0	0	4	6	7	42	1	0	Aromatic-L-amino-acid decarboxylase
TRIAE_CS42_2AL_TGACv1_097459_AA0324280	299	416	280	2445	1398	1811	243	190	209	Protein kinase domain
TRIAE_CS42_2AL_TGACv1_097781_AA0325100	25	11	12	122	61	73	95	23	32	Myb domain
TRIAE_CS42_2AL_TGACv1_098021_AA0325500	123	56	83	3029	1349	1568	86	47	64	Heavy metal-associated domain, HMA
TRIAE_CS42_2AL_TGACv1_098281_AA0325880	227	182	237	14752	8395	9862	253	240	202	consensus disorder prediction
TRIAE_CS42_2AL_TGACv1_098394_AA0326180	3	0	1	31	16	15	4	3	0	SANT
TRIAE_CS42_2AL_TGACv1_098394_AA0326190	28	18	22	264	180	127	25	2	4	Homeodomain-like
TRIAE_CS42_2AL_TGACv1_105695_AA0328280	0	2	1	10	9	9	8	4	1	#N/A
TRIAE_CS42_2AS_TGACv1_112109_AA0330670	1	0	1	8	10	10	7	8	6	consensus disorder prediction
TRIAE_CS42_2AS_TGACv1_112142_AA0331320	144	69	105	1585	1013	1154	114	88	96	Late embryogenesis abundant protein, LEA-14
TRIAE_CS42_2AS_TGACv1_112150_AA0331520	236	204	192	1188	737	897	417	252	241	consensus disorder prediction
TRIAE_CS42_2AS_TGACv1_112150_AA0331530	6	4	2	107	47	64	15	3	0	GST_N_Tau
TRIAE_CS42_2AS_TGACv1_112164_AA0331900	6	1	1	58	13	35	0	1	0	Non-haem dioxygenase N-terminal domain
TRIAE_CS42_2AS_TGACv1_112164_AA0331910	6	2	3	83	33	55	1	1	0	#N/A
TRIAE_CS42_2AS_TGACv1_112164_AA0332040	5	6	5	67	29	83	8	14	9	Oxoglutarate/iron-dependent dioxygenase
TRIAE_CS42_2AS_TGACv1_112168_AA0332230	321	228	347	1550	1284	1336	313	200	334	consensus disorder prediction
TRIAE_CS42_2AS_TGACv1_112201_AA0333090	179	163	151	1093	647	742	198	133	140	Glycosyl transferase, family 43
TRIAE_CS42_2AS_TGACv1_112330_AA0335600	531	462	576	6643	3502	5373	2052	1342	1672	ABCG_EPDR
TRIAE_CS42_2AS_TGACv1_112339_AA0335910	41	15	21	199	106	183	8	9	10	P-loop containing nucleoside triphosphate hydrolase
TRIAE_CS42_2AS_TGACv1_112339_AA0335960	8	0	6	42	20	15	1	3	3	Cullin repeat-like-containing domain
TRIAE_CS42_2AS_TGACv1_112339_AA0335970	9	4	7	80	66	73	19	27	17	Exocyst complex component Exo70
TRIAE_CS42_2AS_TGACv1_112388_AA0337020	68	9	11	904	710	582	28	13	30	consensus disorder prediction
TRIAE_CS42_2AS_TGACv1_112389_AA0337070	46	21	14	554	299	405	13	16	19	consensus disorder prediction
TRIAE_CS42_2AS_TGACv1_112391_AA0337140	140	183	135	793	967	690	517	410	217	consensus disorder prediction
TRIAE_CS42_2AS_TGACv1_112396_AA0337300	68	38	53	549	114	234	153	164	191	Nucleotide-diphospho-sugar transferases
TRIAE_CS42_2AS_TGACv1_112398_AA0337320	69	19	52	279	304	235	34	33	19	EF-hand domain
TRIAE_CS42_2AS_TGACv1_112465_AA0338580	321	232	385	1851	1734	1156	544	453	608	GH3 family
TRIAE_CS42_2AS_TGACv1_112504_AA0339490	61	81	94	767	693	831	252	185	187	GST_N_Tau
TRIAE_CS42_2AS_TGACv1_112511_AA0339640	3	3	4	56	10	23	31	4	8	#N/A
TRIAE_CS42_2AS_TGACv1_112531_AA0339980	10	3	6	60	22	37	4	4	6	Leucine-rich repeat domain, L domain-like
TRIAE_CS42_2AS_TGACv1_112560_AA0341040	13	16	13	175	209	162	2	7	12	Plant disease resistance response protein
TRIAE_CS42_2AS_TGACv1_112673_AA0343140	7	13	14	112	39	73	45	27	18	Protein kinase domain
TRIAE_CS42_2AS_TGACv1_112675_AA0343270	208	24	48	1234	1066	1022	230	53	78	Aromatic amino acid lyase
TRIAE_CS42_2AS_TGACv1_112687_AA0343460	18	19	15	102	79	65	44	31	19	consensus disorder prediction
TRIAE_CS42_2AS_TGACv1_112703_AA0343730	23	2	7	136	64	117	13	1	1	Zinc finger, C2H2
TRIAE_CS42_2AS_TGACv1_112744_AA0344440	1	3	0	23	25	9	0	2	2	#N/A
TRIAE_CS42_2AS_TGACv1_112823_AA0345760	92	64	38	635	877	740	160	82	49	#N/A
TRIAE_CS42_2AS_TGACv1_112831_AA0345900	167	171	236	3417	3041	3023	318	156	333	#N/A
TRIAE_CS42_2AS_TGACv1_112852_AA0346180	27	19	47	892	547	764	527	125	136	S-adenosyl-L-methionine-dependent methyltransferase
TRIAE_CS42_2AS_TGACv1_112866_AA0346290	0	2	4	13	19	16	0	1	3	consensus disorder prediction
TRIAE_CS42_2AS_TGACv1_112882_AA0346490	28	60	68	6172	5231	4786	1502	112	165	Heat shock protein Hsp90 family
TRIAE_CS42_2AS_TGACv1_112938_AA0348170	22	16	20	178	227	160	7	1	0	ABC transporter type 1, transmembrane domain
TRIAE_CS42_2AS_TGACv1_112941_AA0348200	3	2	1	13	6	19	3	10	7	Prokaryotic membrane lipoprotein lipid attachment site profile.
TRIAE_CS42_2AS_TGACv1_112965_AA0348840	2	3	0	26	25	17	8	1	0	RNA-dependent RNA polymerase, eukaryotic-type
TRIAE_CS42_2AS_TGACv1_112977_AA0348970	155	157	164	910	621	725	455	375	376	#N/A
TRIAE_CS42_2AS_TGACv1_112984_AA0349150	1	1	1	82	47	83	2	2	3	Actin cross-linking
TRIAE_CS42_2AS_TGACv1_113002_AA0349480	3	3	2	43	47	32	26	4	4	NAD-dependent epimerase/dehydratase
TRIAE_CS42_2AS_TGACv1_113054_AA0350470	0	0	1	12	7	11	3	0	1	#N/A
TRIAE_CS42_2AS_TGACv1_113054_AA0350480	252	256	268	3900	1831	2924	322	137	137	Sulfotransferase domain
TRIAE_CS42_2AS_TGACv1_113084_AA0350970	9	7	12	48	38	49	14	14	37	Cytochrome P450
TRIAE_CS42_2AS_TGACv1_113098_AA0351170	8	3	3	32	34	46	0	3	2	Cytochrome P450
TRIAE_CS42_2AS_TGACv1_113140_AA0351850	52	35	50	1672	931	1240	158	53	71	Serine/threonine-protein kinase, active site
TRIAE_CS42_2AS_TGACv1_113164_AA0352370	8	1	6	45	22	50	7	4	1	#N/A
TRIAE_CS42_2AS_TGACv1_113168_AA0352430	118	73	61	1251	955	1175	148	45	41	#N/A
TRIAE_CS42_2AS_TGACv1_113175_AA0352590	214	158	203	1184	1399	1174	289	228	182	AAA domain
TRIAE_CS42_2AS_TGACv1_113210_AA0353090	738	643	648	4359	2396	3473	781	576	613	#N/A
TRIAE_CS42_2AS_TGACv1_113212_AA0353100	69	85	53	390	199	319	41	24	25	#N/A
TRIAE_CS42_2AS_TGACv1_113238_AA0353290	9	11	11	58	76	44	14	9	9	#N/A
TRIAE_CS42_2AS_TGACv1_113238_AA0353300	10	6	8	111	167	87	33	8	4	#N/A
TRIAE_CS42_2AS_TGACv1_113245_AA0353450	52	49	43	373	167	301	337	55	112	consensus disorder prediction
TRIAE_CS42_2AS_TGACv1_113258_AA0353590	19	22	26	106	160	114	11	16	26	consensus disorder prediction
TRIAE_CS42_2AS_TGACv1_113289_AA0354090	28	11	41	117	113	135	18	14	21	consensus disorder prediction
TRIAE_CS42_2AS_TGACv1_113337_AA0354640	0	0	0	31	11	18	0	2	1	Cytochrome P450, E-class, group I
TRIAE_CS42_2AS_TGACv1_113337_AA0354660	2	3	2	741	515	734	22	4	5	Cytochrome P450
TRIAE_CS42_2AS_TGACv1_113436_AA0356020	0	1	0	12	3	5	0	0	0	Protein of unknown function DUF3681
TRIAE_CS42_2AS_TGACv1_113444_AA0356080	1274	1197	1680	8116	4915	7207	2254	1076	1396	Mlo-related protein
TRIAE_CS42_2AS_TGACv1_113598_AA0358340	36	16	49	498	178	331	33	72	137	Protein kinase-like domain
TRIAE_CS42_2AS_TGACv1_113692_AA0359480	4	2	1	23	5	20	10	2	0	Reverse transcriptase zinc-binding domain
TRIAE_CS42_2AS_TGACv1_113707_AA0359660	133	105	75	640	579	527	209	278	256	consensus disorder prediction
TRIAE_CS42_2AS_TGACv1_113792_AA0360550	0	2	1	46	40	45	1	5	0	UDP-glucuronosyl/UDP-glucosyltransferase
TRIAE_CS42_2AS_TGACv1_113803_AA0360840	225	230	142	2294	1169	1627	453	114	114	AMP-dependent synthetase/ligase
TRIAE_CS42_2AS_TGACv1_113906_AA0362240	12	8	2	119	76	84	20	7	10	Protein of unknown function DUF1719
TRIAE_CS42_2AS_TGACv1_113931_AA0362580	0	0	0	8	10	5	1	2	2	Gnk2-homologous domain
TRIAE_CS42_2AS_TGACv1_114163_AA0364530	110	105	87	448	466	430	159	187	137	#N/A
TRIAE_CS42_2AS_TGACv1_114173_AA0364590	104	49	74	982	623	701	153	89	89	WRKY domain
TRIAE_CS42_2AS_TGACv1_114398_AA0366720	36	13	20	113	103	102	13	9	14	#N/A
TRIAE_CS42_2AS_TGACv1_114434_AA0367190	90	44	109	2345	1524	1672	51	46	51	Concanavalin A-like lectin/glucanase domain
TRIAE_CS42_2AS_TGACv1_114535_AA0367840	551	503	772	4032	2850	3093	2197	2201	2034	Transcription factor GRAS
TRIAE_CS42_2AS_TGACv1_114537_AA0367910	276	247	195	1730	771	1341	661	156	187	#N/A
TRIAE_CS42_2AS_TGACv1_114583_AA0368170	88	61	85	801	507	649	207	97	130	Serine-threonine/tyrosine-protein kinase catalytic domain
TRIAE_CS42_2AS_TGACv1_114678_AA0368830	78	27	33	593	424	434	56	76	71	Nucleotide-diphospho-sugar transferases
TRIAE_CS42_2AS_TGACv1_114720_AA0369090	0	0	0	13	17	11	0	0	0	#N/A
TRIAE_CS42_2AS_TGACv1_114832_AA0369660	532	484	592	7345	5236	5195	736	1323	1132	consensus disorder prediction
TRIAE_CS42_2AS_TGACv1_115086_AA0370920	223	203	306	3098	2040	3031	536	420	414	#N/A
TRIAE_CS42_2AS_TGACv1_115718_AA0373060	373	200	170	1505	916	1155	506	493	442	Armadillo
TRIAE_CS42_2BL_TGACv1_129283_AA0376470	172	94	79	782	434	484	169	391	643	Homeodomain-like
TRIAE_CS42_2BL_TGACv1_129294_AA0376980	0	0	0	7	5	4	0	2	0	consensus disorder prediction
TRIAE_CS42_2BL_TGACv1_129315_AA0378140	44	34	39	179	218	123	27	27	20	Oxoglutarate/iron-dependent dioxygenase
TRIAE_CS42_2BL_TGACv1_129338_AA0379250	9	26	13	209	188	199	284	19	29	consensus disorder prediction
TRIAE_CS42_2BL_TGACv1_129377_AA0380840	2	3	7	44	76	85	88	21	6	GT1_Gtf_like
TRIAE_CS42_2BL_TGACv1_129382_AA0381040	252	295	238	1724	921	1218	498	370	326	Zinc finger, C3HC4 type (RING finger)
TRIAE_CS42_2BL_TGACv1_129391_AA0381420	16	15	15	132	56	100	12	4	8	#N/A
TRIAE_CS42_2BL_TGACv1_129419_AA0382880	430	361	503	3477	2493	2854	651	352	476	Tetratricopeptide repeat
TRIAE_CS42_2BL_TGACv1_129423_AA0383040	2	2	1	18	6	10	3	4	4	F-box domain
TRIAE_CS42_2BL_TGACv1_129444_AA0383940	327	313	371	1962	1418	1409	217	191	157	IQ motif, EF-hand binding site
TRIAE_CS42_2BL_TGACv1_129467_AA0384960	209	117	193	1749	1149	1380	432	285	293	Transcription factor GRAS
TRIAE_CS42_2BL_TGACv1_129475_AA0385350	4	1	1	10	12	16	0	9	13	AP2/ERF domain
TRIAE_CS42_2BL_TGACv1_129516_AA0386790	191	148	121	1101	577	713	360	81	97	#N/A
TRIAE_CS42_2BL_TGACv1_129535_AA0387540	20	29	34	372	118	280	51	48	53	consensus disorder prediction
TRIAE_CS42_2BL_TGACv1_129553_AA0388330	12	12	4	56	35	60	3	5	11	#N/A
TRIAE_CS42_2BL_TGACv1_129574_AA0389300	5	3	0	9	22	19	19	3	1	GST_N_Tau
TRIAE_CS42_2BL_TGACv1_129574_AA0389310	129	65	118	1228	1083	1068	897	152	190	Glutathione S-transferase, N-terminal
TRIAE_CS42_2BL_TGACv1_129609_AA0390320	11	7	2	58	43	38	19	11	7	RT_nLTR_like
TRIAE_CS42_2BL_TGACv1_129613_AA0390550	28	22	33	171	184	187	92	55	64	consensus disorder prediction
TRIAE_CS42_2BL_TGACv1_129638_AA0391290	7	9	2	134	132	90	6	13	5	ABC transporter type 1, transmembrane domain
TRIAE_CS42_2BL_TGACv1_129673_AA0392230	0	2	1	78	37	59	9	1	16	CO/COL/TOC1, conserved site
TRIAE_CS42_2BL_TGACv1_129703_AA0393130	3	1	0	24	8	6	0	0	0	consensus disorder prediction
TRIAE_CS42_2BL_TGACv1_129703_AA0393140	5	0	2	49	10	19	2	1	1	consensus disorder prediction
TRIAE_CS42_2BL_TGACv1_129726_AA0393910	34	23	44	201	210	178	85	78	58	Cyclin-like
TRIAE_CS42_2BL_TGACv1_129771_AA0395320	3	0	0	32	28	14	2	0	0	Homeodomain-like
TRIAE_CS42_2BL_TGACv1_129778_AA0395600	74	107	48	726	337	373	119	51	77	Protein kinase-like domain
TRIAE_CS42_2BL_TGACv1_129809_AA0396880	256	201	173	1203	907	895	319	376	430	U box domain
TRIAE_CS42_2BL_TGACv1_129857_AA0398150	46	72	45	3251	1974	2555	128	31	25	Multi antimicrobial extrusion protein
TRIAE_CS42_2BL_TGACv1_129885_AA0398720	2	4	2	19	9	15	0	0	0	consensus disorder prediction
TRIAE_CS42_2BL_TGACv1_129936_AA0399870	1023	225	396	5567	3222	4030	547	413	674	Ribonuclease H-like domain
TRIAE_CS42_2BL_TGACv1_129937_AA0399900	3	3	4	29	23	22	5	4	5	#N/A
TRIAE_CS42_2BL_TGACv1_129995_AA0401220	34	33	22	542	273	438	636	44	35	UDP-glucuronosyl/UDP-glucosyltransferase
TRIAE_CS42_2BL_TGACv1_130047_AA0402320	265	170	172	4158	2503	2648	674	384	307	#N/A
TRIAE_CS42_2BL_TGACv1_130296_AA0408240	30	37	45	181	140	165	22	30	23	Amino acid transporter, transmembrane domain
TRIAE_CS42_2BL_TGACv1_130375_AA0409800	11	2	7	40	56	41	11	15	10	#N/A
TRIAE_CS42_2BL_TGACv1_130395_AA0410290	53	135	101	6197	3334	4307	60	39	48	Heavy metal-associated domain, HMA
TRIAE_CS42_2BL_TGACv1_130395_AA0410320	10	3	6	193	79	146	7	7	3	#N/A
TRIAE_CS42_2BL_TGACv1_130404_AA0410640	179	193	146	2146	986	1389	32	25	32	Heavy metal-associated domain, HMA
TRIAE_CS42_2BL_TGACv1_130517_AA0412760	1	2	0	18	11	9	5	1	1	Leucine-rich repeat domain, L domain-like
TRIAE_CS42_2BL_TGACv1_130558_AA0413560	218	278	220	3219	1840	2446	417	382	451	Protein kinase-like domain
TRIAE_CS42_2BL_TGACv1_130605_AA0414600	1	8	4	35	12	20	15	1	5	#N/A
TRIAE_CS42_2BL_TGACv1_130658_AA0415490	527	197	457	4533	2046	2733	122	169	182	WRKY domain
TRIAE_CS42_2BL_TGACv1_130700_AA0416210	17	15	8	106	41	58	178	12	3	Ubiquitin
TRIAE_CS42_2BL_TGACv1_130734_AA0417020	0	3	0	19	27	18	22	2	2	Cactin, C-terminal
TRIAE_CS42_2BL_TGACv1_130737_AA0417070	348	352	432	2117	1424	1605	957	619	551	Serine-threonine/tyrosine-protein kinase catalytic domain
TRIAE_CS42_2BL_TGACv1_130768_AA0417670	0	0	0	0	43	209	34	0	0	#N/A
TRIAE_CS42_2BL_TGACv1_130814_AA0418250	5	0	2	33	13	15	22	3	6	Myb domain
TRIAE_CS42_2BL_TGACv1_130816_AA0418300	1	7	0	20	11	18	1	0	0	#N/A
TRIAE_CS42_2BL_TGACv1_130844_AA0418630	6	18	10	114	81	98	58	24	13	Domain unknown function DUF295
TRIAE_CS42_2BL_TGACv1_130856_AA0418930	8	14	1	39	29	32	5	6	5	#N/A
TRIAE_CS42_2BL_TGACv1_130896_AA0419530	45	26	17	136	150	109	90	32	22	Cysteine-rich transmembrane CYSTM domain
TRIAE_CS42_2BL_TGACv1_130899_AA0419580	8	15	5	53	36	38	11	12	7	HAD_like
TRIAE_CS42_2BL_TGACv1_130934_AA0420140	6	6	1	17	24	24	25	12	2	Transketolase binding site
TRIAE_CS42_2BL_TGACv1_130980_AA0420860	1	4	5	25	16	20	7	4	7	Amino acid/polyamine transporter I
TRIAE_CS42_2BL_TGACv1_131173_AA0423790	115	116	90	962	422	620	112	87	85	Indole-3-glycerol phosphate synthase
TRIAE_CS42_2BL_TGACv1_131175_AA0423890	0	0	1	12	7	11	3	0	0	Protein of unknown function DUF594
TRIAE_CS42_2BL_TGACv1_131277_AA0425370	5	5	1	44	7	27	8	1	1	#N/A
TRIAE_CS42_2BL_TGACv1_131297_AA0425570	2	0	2	19	11	7	3	1	0	Armadillo-like helical
TRIAE_CS42_2BL_TGACv1_131310_AA0425790	3	6	0	17	16	14	3	3	2	Ovate protein family, C-terminal
TRIAE_CS42_2BL_TGACv1_131310_AA0425810	423	155	316	1856	1054	1533	443	512	690	Late embryogenesis abundant protein, LEA-14
TRIAE_CS42_2BL_TGACv1_131329_AA0426120	9	11	5	295	109	197	13	3	3	#N/A
TRIAE_CS42_2BL_TGACv1_131372_AA0426830	231	152	244	887	981	765	628	787	646	consensus disorder prediction
TRIAE_CS42_2BL_TGACv1_131378_AA0426900	7	3	3	91	70	74	19	5	6	consensus disorder prediction
TRIAE_CS42_2BL_TGACv1_131397_AA0427130	1	1	1	13	29	22	1	2	0	#N/A
TRIAE_CS42_2BL_TGACv1_131467_AA0428190	497	448	377	2783	1450	2107	1264	1132	1149	#N/A
TRIAE_CS42_2BL_TGACv1_131487_AA0428380	810	521	831	6004	2849	5088	2495	1581	2523	#N/A
TRIAE_CS42_2BL_TGACv1_131517_AA0428760	166	56	64	1245	597	916	416	179	261	Phenylalanine ammonia-lyase
TRIAE_CS42_2BL_TGACv1_131521_AA0428800	42	31	38	2396	1394	1632	48	54	52	consensus disorder prediction
TRIAE_CS42_2BL_TGACv1_131548_AA0429060	7	0	0	36	15	18	4	0	1	consensus disorder prediction
TRIAE_CS42_2BL_TGACv1_131618_AA0429920	164	144	197	1549	1086	1185	201	201	294	Alpha/Beta hydrolase fold
TRIAE_CS42_2BL_TGACv1_131715_AA0431080	38	11	22	205	388	176	55	76	77	Protein kinase domain
TRIAE_CS42_2BL_TGACv1_131719_AA0431100	28	22	25	193	183	184	12	9	13	consensus disorder prediction
TRIAE_CS42_2BL_TGACv1_131738_AA0431450	6	18	7	74	50	47	16	9	6	#N/A
TRIAE_CS42_2BL_TGACv1_131865_AA0433020	0	0	1	102	43	44	5	2	4	Heavy metal-associated domain, HMA
TRIAE_CS42_2BL_TGACv1_131892_AA0433310	5	1	2	128	121	177	20	1	2	Pyridoxal-phosphate binding site
TRIAE_CS42_2BL_TGACv1_131953_AA0433890	286	173	151	1129	929	893	351	366	357	#N/A
TRIAE_CS42_2BL_TGACv1_132000_AA0434350	22	9	12	977	454	503	11	6	9	#N/A
TRIAE_CS42_2BL_TGACv1_132000_AA0434360	17	11	22	1662	662	1093	77	15	14	consensus disorder prediction
TRIAE_CS42_2BL_TGACv1_132000_AA0434370	32	36	24	449	198	252	19	8	7	consensus disorder prediction
TRIAE_CS42_2BL_TGACv1_132086_AA0435050	1	2	5	79	35	52	4	9	5	Heavy metal-associated domain, HMA
TRIAE_CS42_2BL_TGACv1_132101_AA0435290	29	31	44	172	154	133	95	79	74	Cytochrome P450, E-class, group I
TRIAE_CS42_2BL_TGACv1_132106_AA0435350	2	4	2	29	10	13	4	0	3	Protein of unknown function DUF599
TRIAE_CS42_2BL_TGACv1_132120_AA0435430	12	6	8	456	260	405	30	10	17	L-Aspartase-like
TRIAE_CS42_2BL_TGACv1_132237_AA0436190	9	5	16	59	57	55	53	24	22	consensus disorder prediction
TRIAE_CS42_2BL_TGACv1_132238_AA0436240	7	8	7	78	43	59	15	5	16	#N/A
TRIAE_CS42_2BL_TGACv1_132297_AA0436590	101	112	91	1073	720	792	183	75	45	Zinc finger, MYND-type
TRIAE_CS42_2BL_TGACv1_132298_AA0436600	6	5	4	17	25	19	2	1	4	#N/A
TRIAE_CS42_2BL_TGACv1_132324_AA0436760	485	598	485	5265	1961	3544	1484	1477	1672	#N/A
TRIAE_CS42_2BL_TGACv1_132354_AA0437000	0	0	0	41	23	29	6	0	2	Pyridoxal-phosphate binding site
TRIAE_CS42_2BL_TGACv1_132535_AA0438220	861	559	720	5981	2633	4415	942	774	986	Aromatic amino acid lyase
TRIAE_CS42_2BL_TGACv1_132648_AA0438860	107	163	104	828	439	550	327	73	42	consensus disorder prediction
TRIAE_CS42_2BL_TGACv1_132767_AA0439680	487	850	685	8026	5367	7354	4740	577	597	consensus disorder prediction
TRIAE_CS42_2BL_TGACv1_132951_AA0440690	74	72	106	639	365	410	185	107	81	#N/A
TRIAE_CS42_2BL_TGACv1_133061_AA0441150	3	2	2	24	7	9	6	4	2	#N/A
TRIAE_CS42_2BL_TGACv1_133094_AA0441380	471	449	533	7398	4644	5443	1104	1054	1155	PLAT/LH2 domain
TRIAE_CS42_2BL_TGACv1_144910_AA0446120	0	0	1	11	10	6	11	1	0	#N/A
TRIAE_CS42_2BS_TGACv1_145841_AA0446540	3	5	6	33	9	23	3	1	7	#N/A
TRIAE_CS42_2BS_TGACv1_145847_AA0447110	2	4	3	67	58	88	65	4	5	consensus disorder prediction
TRIAE_CS42_2BS_TGACv1_145847_AA0447120	176	191	292	5673	4164	4597	1534	467	418	AdoMet_MTases
TRIAE_CS42_2BS_TGACv1_145892_AA0448350	145	244	121	1139	1148	942	697	465	272	consensus disorder prediction
TRIAE_CS42_2BS_TGACv1_145958_AA0450840	1	1	1	104	110	100	7	2	0	#N/A
TRIAE_CS42_2BS_TGACv1_146003_AA0452670	17	4	5	169	69	133	2	7	11	consensus disorder prediction
TRIAE_CS42_2BS_TGACv1_146019_AA0453300	14	19	6	293	103	218	9	1	3	NAD(P)-binding domain
TRIAE_CS42_2BS_TGACv1_146019_AA0453320	27	17	10	281	90	219	4	2	0	#N/A
TRIAE_CS42_2BS_TGACv1_146031_AA0453560	60	30	26	240	127	235	40	22	19	NB-ARC
TRIAE_CS42_2BS_TGACv1_146120_AA0455800	6	7	7	23	37	26	35	12	17	#N/A
TRIAE_CS42_2BS_TGACv1_146136_AA0456320	486	283	495	2797	1522	2558	599	226	307	Mlo-related protein
TRIAE_CS42_2BS_TGACv1_146136_AA0456330	578	411	667	3086	1436	2787	800	340	558	consensus disorder prediction
TRIAE_CS42_2BS_TGACv1_146140_AA0456520	238	214	274	1300	865	1175	772	421	395	ABC transporter, conserved site
TRIAE_CS42_2BS_TGACv1_146144_AA0456630	70	54	49	455	255	293	74	58	43	consensus disorder prediction
TRIAE_CS42_2BS_TGACv1_146153_AA0456850	90	63	62	2131	947	1553	308	77	126	Leucine-rich repeat
TRIAE_CS42_2BS_TGACv1_146201_AA0458690	7	25	26	1658	1729	1674	497	25	96	#N/A
TRIAE_CS42_2BS_TGACv1_146203_AA0458750	2	1	4	25	11	21	9	3	1	consensus disorder prediction
TRIAE_CS42_2BS_TGACv1_146215_AA0459140	17	5	12	80	60	36	54	26	37	Short-chain dehydrogenase/reductase SDR
TRIAE_CS42_2BS_TGACv1_146236_AA0459810	3	3	3	42	12	26	10	3	2	STKc_IRAK
TRIAE_CS42_2BS_TGACv1_146325_AA0462680	1	0	0	13	11	9	0	2	1	Short-chain dehydrogenase/reductase SDR
TRIAE_CS42_2BS_TGACv1_146371_AA0463610	11	4	8	103	21	47	3	0	0	WRKY domain
TRIAE_CS42_2BS_TGACv1_146441_AA0465120	17	17	19	107	91	50	38	55	60	#N/A
TRIAE_CS42_2BS_TGACv1_146486_AA0466360	0	2	0	6	11	7	4	3	3	Frigida-like
TRIAE_CS42_2BS_TGACv1_146642_AA0469960	147	171	173	1140	951	885	290	411	553	Alpha/Beta hydrolase fold
TRIAE_CS42_2BS_TGACv1_146679_AA0470560	232	165	271	924	1373	773	264	207	382	GH3 family
TRIAE_CS42_2BS_TGACv1_146719_AA0471530	2	4	1	20	8	13	3	5	3	Ribonuclease H-like domain
TRIAE_CS42_2BS_TGACv1_146787_AA0472710	198	102	117	1130	516	957	295	57	65	Fumarase/histidase, N-terminal
TRIAE_CS42_2BS_TGACv1_146787_AA0472750	266	93	122	1716	902	1393	450	82	113	Aromatic amino acid lyase
TRIAE_CS42_2BS_TGACv1_146831_AA0473640	0	0	0	0	12	16	4	0	0	#N/A
TRIAE_CS42_2BS_TGACv1_146868_AA0474290	16	31	37	318	105	190	146	63	67	WRKY domain
TRIAE_CS42_2BS_TGACv1_146925_AA0475480	17	24	13	369	106	161	37	12	7	Alpha/Beta hydrolase fold
TRIAE_CS42_2BS_TGACv1_147060_AA0477440	49	31	39	264	162	174	21	19	14	consensus disorder prediction
TRIAE_CS42_2BS_TGACv1_147099_AA0477950	379	351	267	4866	2269	3376	797	214	190	AMP-dependent synthetase/ligase
TRIAE_CS42_2BS_TGACv1_147113_AA0478190	0	0	0	4	7	5	0	0	0	#N/A
TRIAE_CS42_2BS_TGACv1_147173_AA0479070	6	6	2	87	42	42	8	12	7	Protein argonaute, N-terminal
TRIAE_CS42_2BS_TGACv1_147253_AA0480620	20	20	37	147	77	119	16	19	17	WRKY domain
TRIAE_CS42_2BS_TGACv1_147270_AA0480830	175	133	228	3977	2477	2459	393	180	190	Protein kinase-like domain
TRIAE_CS42_2BS_TGACv1_147285_AA0481090	942	853	835	5373	3346	3466	78	195	192	consensus disorder prediction
TRIAE_CS42_2BS_TGACv1_147452_AA0483330	679	905	849	6689	3290	4494	3610	2283	2297	#N/A
TRIAE_CS42_2BS_TGACv1_147474_AA0483570	14	9	6	88	32	67	14	19	10	#N/A
TRIAE_CS42_2BS_TGACv1_147477_AA0483610	2	1	5	50	58	39	5	2	4	Translation initiation factor IF2/IF5, N-terminal
TRIAE_CS42_2BS_TGACv1_147534_AA0484450	0	1	4	15	7	16	2	0	0	Exocyst complex component Exo70
TRIAE_CS42_2BS_TGACv1_147664_AA0486170	0	0	0	6	9	9	1	1	0	consensus disorder prediction
TRIAE_CS42_2BS_TGACv1_147669_AA0486260	3	6	2	35	16	24	35	9	9	Protein of unknown function DUF1719
TRIAE_CS42_2BS_TGACv1_147730_AA0487040	184	68	62	723	362	451	69	34	63	P-loop containing nucleoside triphosphate hydrolase
TRIAE_CS42_2BS_TGACv1_148020_AA0489840	9	20	9	84	84	106	223	17	9	Proline rich extensin signature
TRIAE_CS42_2BS_TGACv1_148070_AA0490340	3	1	7	113	94	125	68	3	14	consensus disorder prediction
TRIAE_CS42_2BS_TGACv1_148173_AA0491160	131	115	183	2935	2361	2579	301	101	196	Zinc finger, RING-type
TRIAE_CS42_2BS_TGACv1_148429_AA0492780	100	133	107	977	533	670	165	94	84	START_STARD2_7-like
TRIAE_CS42_2BS_TGACv1_148543_AA0493630	76	47	60	305	285	290	73	76	73	ATPase, AAA-type, core
TRIAE_CS42_2BS_TGACv1_148549_AA0493660	124	88	101	517	339	519	389	170	178	ADCK2-like
TRIAE_CS42_2BS_TGACv1_148575_AA0493880	35	3	9	173	107	171	22	2	1	Zinc finger, C2H2
TRIAE_CS42_2BS_TGACv1_148639_AA0494290	34	43	26	361	194	308	141	78	100	RX-CC_like
TRIAE_CS42_2BS_TGACv1_149027_AA0495950	23	3	1	213	91	134	7	3	3	Probable zinc-ribbon domain, plant
TRIAE_CS42_2BS_TGACv1_149094_AA0496260	14	16	17	116	110	112	44	19	10	NAD(P)-binding domain
TRIAE_CS42_2BS_TGACv1_149616_AA0497360	9	10	13	144	72	187	8	1	0	Legume lectin domain
TRIAE_CS42_2BS_TGACv1_149741_AA0497560	1	2	1	22	21	19	3	6	1	#N/A
TRIAE_CS42_2BS_TGACv1_149924_AA0497820	400	338	455	11875	6265	9348	1081	234	295	P-loop containing nucleoside triphosphate hydrolase
TRIAE_CS42_2BS_TGACv1_149972_AA0497860	192	160	219	2243	1703	1784	934	441	537	#N/A
TRIAE_CS42_2BS_TGACv1_150353_AA0498140	6	1	3	39	28	26	1	0	2	Leucine-rich repeat
TRIAE_CS42_2DL_TGACv1_157888_AA0500440	6	7	6	38	12	37	8	6	11	consensus disorder prediction
TRIAE_CS42_2DL_TGACv1_157905_AA0501230	1	0	1	12	30	21	3	1	0	#N/A
TRIAE_CS42_2DL_TGACv1_157911_AA0501410	0	2	2	480	205	325	9	0	0	#N/A
TRIAE_CS42_2DL_TGACv1_157911_AA0501420	0	2	6	187	157	175	69	8	2	consensus disorder prediction
TRIAE_CS42_2DL_TGACv1_157933_AA0502470	86	70	65	1087	525	660	169	158	173	#N/A
TRIAE_CS42_2DL_TGACv1_157979_AA0504630	7	4	3	150	98	144	45	6	12	Pyridoxal-phosphate binding site
TRIAE_CS42_2DL_TGACv1_158025_AA0506300	17	7	6	46	54	55	3	7	7	Ovate protein family, C-terminal
TRIAE_CS42_2DL_TGACv1_158048_AA0507250	628	426	639	4375	1939	3427	2109	1241	1950	Phenylalanine ammonia-lyase, shielding domain
TRIAE_CS42_2DL_TGACv1_158053_AA0507440	357	309	297	1688	1127	1685	260	297	275	consensus disorder prediction
TRIAE_CS42_2DL_TGACv1_158060_AA0507640	36	37	32	285	270	225	71	88	135	Protein of unknown function DUF241, plant
TRIAE_CS42_2DL_TGACv1_158090_AA0508720	3	0	0	46	29	23	11	0	3	Homeodomain-like
TRIAE_CS42_2DL_TGACv1_158090_AA0508730	19	5	11	137	81	75	33	8	13	Myb domain
TRIAE_CS42_2DL_TGACv1_158090_AA0508750	1	0	4	112	82	47	19	7	1	Myb domain
TRIAE_CS42_2DL_TGACv1_158157_AA0510820	0	0	0	10	7	4	0	0	0	consensus disorder prediction
TRIAE_CS42_2DL_TGACv1_158157_AA0510850	10	0	7	36	29	17	1	0	0	#N/A
TRIAE_CS42_2DL_TGACv1_158177_AA0511450	32	48	25	206	248	248	95	73	54	#N/A
TRIAE_CS42_2DL_TGACv1_158198_AA0512160	902	702	1035	5946	4837	5251	920	660	833	AP2/ERF domain
TRIAE_CS42_2DL_TGACv1_158217_AA0512760	4	4	4	38	46	17	2	2	3	Cationic amino acid transporter, C-terminal
TRIAE_CS42_2DL_TGACv1_158228_AA0513110	21	43	22	320	177	208	28	9	18	Amino acid transporter, transmembrane domain
TRIAE_CS42_2DL_TGACv1_158230_AA0513140	245	164	286	3983	2578	3000	865	415	550	Transcription factor GRAS
TRIAE_CS42_2DL_TGACv1_158240_AA0513320	301	331	222	5005	4846	5327	1344	503	516	NADP-dependent oxidoreductase domain
TRIAE_CS42_2DL_TGACv1_158319_AA0515510	6	2	2	41	23	27	4	4	3	#N/A
TRIAE_CS42_2DL_TGACv1_158333_AA0515890	281	242	259	2689	1091	2203	1480	496	749	Aromatic amino acid lyase
TRIAE_CS42_2DL_TGACv1_158343_AA0516110	119	76	78	5552	3178	3295	86	286	306	Heavy metal-associated domain, HMA
TRIAE_CS42_2DL_TGACv1_158343_AA0516140	116	58	137	10585	6130	6937	127	149	137	Heavy metal-associated domain, HMA
TRIAE_CS42_2DL_TGACv1_158343_AA0516160	342	265	438	13394	7832	8399	775	728	543	consensus disorder prediction
TRIAE_CS42_2DL_TGACv1_158414_AA0518190	1239	561	762	7896	3931	5503	1446	2123	2554	Late embryogenesis abundant protein, LEA-14
TRIAE_CS42_2DL_TGACv1_158414_AA0518200	492	134	252	2828	1213	2078	443	357	534	#N/A
TRIAE_CS42_2DL_TGACv1_158422_AA0518390	7	3	5	101	52	59	22	3	21	consensus disorder prediction
TRIAE_CS42_2DL_TGACv1_158477_AA0519690	28	25	23	176	82	171	173	34	75	Blue (type 1) copper protein, binding site
TRIAE_CS42_2DL_TGACv1_158494_AA0520150	103	110	199	925	440	629	217	118	137	#N/A
TRIAE_CS42_2DL_TGACv1_158540_AA0521450	21	20	39	690	386	569	38	31	34	consensus disorder prediction
TRIAE_CS42_2DL_TGACv1_158572_AA0522140	46	15	15	272	196	165	31	21	16	#N/A
TRIAE_CS42_2DL_TGACv1_158597_AA0522840	1	2	6	20	15	31	36	13	7	Cytochrome P450, conserved site
TRIAE_CS42_2DL_TGACv1_158597_AA0522860	1	4	1	40	19	15	15	6	3	#N/A
TRIAE_CS42_2DL_TGACv1_158639_AA0523740	48	57	28	563	433	334	53	37	30	#N/A
TRIAE_CS42_2DL_TGACv1_158681_AA0524390	1	3	2	27	15	13	7	1	24	#N/A
TRIAE_CS42_2DL_TGACv1_158819_AA0526620	423	132	365	3831	1701	2460	125	195	169	WRKY domain
TRIAE_CS42_2DL_TGACv1_158907_AA0528500	0	4	0	26	25	33	11	1	20	CO/COL/TOC1, conserved site
TRIAE_CS42_2DL_TGACv1_158910_AA0528580	95	68	128	635	311	457	51	53	28	MATE_eukaryotic
TRIAE_CS42_2DL_TGACv1_158910_AA0528600	127	125	117	1112	461	706	175	87	72	MATE_eukaryotic
TRIAE_CS42_2DL_TGACv1_158972_AA0529690	123	75	57	1802	1065	1275	439	134	126	ACT domain
TRIAE_CS42_2DL_TGACv1_159044_AA0531270	544	1121	718	16410	9528	12746	7994	1260	1348	AOX
TRIAE_CS42_2DL_TGACv1_159079_AA0531950	3	0	2	39	24	22	2	0	0	#N/A
TRIAE_CS42_2DL_TGACv1_159162_AA0533630	12	16	6	468	150	433	156	23	35	Aminotransferase class V domain
TRIAE_CS42_2DL_TGACv1_159192_AA0534170	75	76	45	1030	424	465	314	133	91	Regulator of chromosome condensation 1/beta-lactamase-inhibitor protein II
TRIAE_CS42_2DL_TGACv1_159353_AA0536960	314	478	416	2773	1552	2086	1586	1025	1237	#N/A
TRIAE_CS42_2DL_TGACv1_159355_AA0536990	170	108	196	1181	785	968	397	516	680	GRAM domain
TRIAE_CS42_2DL_TGACv1_159432_AA0538240	0	5	2	30	12	17	231	5	6	Zinc-binding ribosomal protein
TRIAE_CS42_2DL_TGACv1_159467_AA0538710	422	78	153	3168	1805	2158	242	78	119	Ribonuclease CAF1
TRIAE_CS42_2DL_TGACv1_159480_AA0538960	4	0	0	10	12	11	0	0	1	#N/A
TRIAE_CS42_2DL_TGACv1_159519_AA0539260	279	281	314	7149	4473	4884	833	724	809	PLAT/LH2 domain
TRIAE_CS42_2DL_TGACv1_159535_AA0539520	0	0	1	4	9	7	1	0	0	O-methyltransferase, family 2
TRIAE_CS42_2DL_TGACv1_159579_AA0540080	346	322	356	1980	1116	1719	599	822	787	Alpha/Beta hydrolase fold
TRIAE_CS42_2DL_TGACv1_159581_AA0540100	7	4	5	178	44	70	26	10	3	Heavy metal-associated domain, HMA
TRIAE_CS42_2DL_TGACv1_159678_AA0541400	26	30	22	158	106	98	33	23	27	DNA-binding pseudobarrel domain
TRIAE_CS42_2DL_TGACv1_159743_AA0542200	371	463	429	2843	1563	2467	1461	570	871	#N/A
TRIAE_CS42_2DL_TGACv1_159789_AA0542800	126	119	108	1249	419	822	267	263	273	consensus disorder prediction
TRIAE_CS42_2DL_TGACv1_159944_AA0544770	247	232	486	1576	1272	1449	1365	859	1218	#N/A
TRIAE_CS42_2DL_TGACv1_159963_AA0544940	0	0	0	26	25	14	0	0	1	#N/A
TRIAE_CS42_2DL_TGACv1_160135_AA0547310	6	4	5	17	23	24	20	12	17	AP2/ERF domain
TRIAE_CS42_2DL_TGACv1_160230_AA0548410	316	327	348	3609	1310	2949	1040	258	475	Transferase
TRIAE_CS42_2DL_TGACv1_160351_AA0549610	510	258	272	3480	3727	3226	298	208	231	Ribosome-inactivating protein, subdomain 1
TRIAE_CS42_2DL_TGACv1_160351_AA0549620	0	0	0	33	78	35	0	0	3	#N/A
TRIAE_CS42_2DL_TGACv1_160354_AA0549710	448	230	346	3368	1708	2295	423	213	221	Pyridoxal phosphate-dependent transferase, major region, subdomain 1
TRIAE_CS42_2DL_TGACv1_160367_AA0549780	2	8	12	48	23	36	35	11	12	Alternative oxidase
TRIAE_CS42_2DL_TGACv1_160390_AA0550030	145	67	66	2166	1091	1238	88	52	41	Heavy metal-associated domain, HMA
TRIAE_CS42_2DL_TGACv1_160390_AA0550040	295	218	305	3453	1762	2248	155	50	71	#N/A
TRIAE_CS42_2DL_TGACv1_160390_AA0550070	437	258	364	10257	5316	6357	341	237	168	Heavy metal-associated domain, HMA
TRIAE_CS42_2DL_TGACv1_160471_AA0550830	270	114	261	1385	990	1097	326	415	681	GRAM domain
TRIAE_CS42_2DL_TGACv1_160492_AA0551110	0	0	0	5	4	7	0	0	0	DNA-binding domain
TRIAE_CS42_2DL_TGACv1_160531_AA0551460	10	5	14	72	49	38	17	5	1	Myb domain
TRIAE_CS42_2DL_TGACv1_160571_AA0551850	1	5	4	34	12	23	0	0	3	consensus disorder prediction
TRIAE_CS42_2DL_TGACv1_160639_AA0552500	2	4	2	28	14	10	9	6	3	consensus disorder prediction
TRIAE_CS42_2DL_TGACv1_160639_AA0552510	492	524	540	3717	2006	3014	1821	1357	1421	consensus disorder prediction
TRIAE_CS42_2DL_TGACv1_160660_AA0552810	603	511	573	3259	2095	2435	1536	838	990	Glutathione S-transferase, C-terminal-like
TRIAE_CS42_2DL_TGACv1_160660_AA0552820	2	3	0	22	17	25	19	3	5	Glutathione S-transferase, C-terminal
TRIAE_CS42_2DL_TGACv1_160666_AA0552910	465	393	461	2604	1938	2014	561	367	428	Tetratricopeptide repeat
TRIAE_CS42_2DL_TGACv1_160902_AA0555030	65	44	77	3732	1595	2060	24	11	22	Heavy metal-associated domain, HMA
TRIAE_CS42_2DL_TGACv1_161043_AA0556250	87	39	66	407	412	285	100	87	109	consensus disorder prediction
TRIAE_CS42_2DL_TGACv1_161383_AA0558400	8	6	4	36	29	12	9	6	4	FBD domain
TRIAE_CS42_2DL_TGACv1_161745_AA0560430	2	0	3	134	89	80	19	3	1	SANT
TRIAE_CS42_2DL_TGACv1_161787_AA0560600	0	0	0	46	73	59	0	1	0	consensus disorder prediction
TRIAE_CS42_2DL_TGACv1_161933_AA0561140	3	5	2	32	33	26	25	6	8	consensus disorder prediction
TRIAE_CS42_2DS_TGACv1_177169_AA0567350	45	63	52	425	239	286	91	68	75	Plastid lipid-associated protein/fibrillin conserved domain
TRIAE_CS42_2DS_TGACv1_177174_AA0567930	0	0	0	11	5	10	1	0	3	consensus disorder prediction
TRIAE_CS42_2DS_TGACv1_177184_AA0568130	18	66	62	4195	3905	3575	957	80	189	Heat shock protein Hsp90, N-terminal
TRIAE_CS42_2DS_TGACv1_177215_AA0569260	493	369	424	2428	1447	1810	680	544	476	Armadillo-type fold
TRIAE_CS42_2DS_TGACv1_177235_AA0569960	23	9	20	118	42	76	1	0	1	consensus disorder prediction
TRIAE_CS42_2DS_TGACv1_177249_AA0570400	151	170	299	3291	2446	2935	534	447	424	GST_N_Tau
TRIAE_CS42_2DS_TGACv1_177260_AA0571040	88	73	115	1914	1465	1629	111	31	65	Zinc finger, RING-type
TRIAE_CS42_2DS_TGACv1_177279_AA0572210	0	0	1	8	12	21	0	2	1	FAD-binding, type 2, subdomain 1
TRIAE_CS42_2DS_TGACv1_177323_AA0573470	657	673	666	4069	2076	3194	812	676	736	EF-hand domain pair
TRIAE_CS42_2DS_TGACv1_177373_AA0574940	11	1	3	100	67	113	11	4	1	Zinc finger, C2H2
TRIAE_CS42_2DS_TGACv1_177392_AA0575400	129	95	95	1252	1204	988	56	32	34	ABC transporter-like
TRIAE_CS42_2DS_TGACv1_177411_AA0576180	10	9	2	397	425	307	32	6	15	#N/A
TRIAE_CS42_2DS_TGACv1_177437_AA0577120	0	0	0	40	15	44	2	0	1	Oxoglutarate/iron-dependent dioxygenase
TRIAE_CS42_2DS_TGACv1_177481_AA0578310	86	56	85	1168	662	798	82	156	157	Glycosyl transferase, family 8
TRIAE_CS42_2DS_TGACv1_177487_AA0578440	14	8	4	59	37	27	7	16	23	Alpha/Beta hydrolase fold
TRIAE_CS42_2DS_TGACv1_177502_AA0578920	1	5	5	88	50	91	52	19	8	#N/A
TRIAE_CS42_2DS_TGACv1_177565_AA0580190	911	1311	959	8023	4809	6838	3485	3968	3437	PDI_a_APS_reductase
TRIAE_CS42_2DS_TGACv1_177582_AA0580590	129	167	180	3912	1741	2627	297	167	149	Tetratricopeptide repeat
TRIAE_CS42_2DS_TGACv1_177658_AA0582060	53	48	59	882	461	502	79	36	49	Alpha/beta hydrolase fold-1
TRIAE_CS42_2DS_TGACv1_177687_AA0582480	4	2	4	28	19	30	3	2	3	NAC domain
TRIAE_CS42_2DS_TGACv1_177710_AA0582860	8	4	8	3888	2047	3145	90	5	1	#N/A
TRIAE_CS42_2DS_TGACv1_177710_AA0582910	1	0	0	293	133	223	5	1	0	UDP-glucuronosyl/UDP-glucosyltransferase
TRIAE_CS42_2DS_TGACv1_177717_AA0583140	8	15	14	84	46	86	7	4	11	#N/A
TRIAE_CS42_2DS_TGACv1_177750_AA0583840	671	511	698	4755	2403	4209	2029	1245	1415	P-loop containing nucleoside triphosphate hydrolase
TRIAE_CS42_2DS_TGACv1_177808_AA0584950	80	65	101	4169	2532	2556	275	149	163	Bulb-type lectin domain
TRIAE_CS42_2DS_TGACv1_177832_AA0585420	409	355	478	3186	1573	2845	677	311	401	Mlo-related protein
TRIAE_CS42_2DS_TGACv1_177860_AA0586210	3	2	0	58	41	52	2	1	1	Translation initiation factor IF2/IF5
TRIAE_CS42_2DS_TGACv1_177865_AA0586260	62	57	93	333	473	359	147	103	133	Protein of unknown function DUF4228, plant
TRIAE_CS42_2DS_TGACv1_177893_AA0586750	0	0	0	10	12	13	1	0	1	Thiamin diphosphate-binding fold
TRIAE_CS42_2DS_TGACv1_177918_AA0587350	64	94	58	956	516	999	1303	33	48	Cytochrome P450, conserved site
TRIAE_CS42_2DS_TGACv1_177920_AA0587360	47	22	53	285	199	208	78	53	35	WRKY domain
TRIAE_CS42_2DS_TGACv1_177934_AA0587700	10	4	2	36	22	27	4	3	1	Leucine-rich repeat
TRIAE_CS42_2DS_TGACv1_177945_AA0587960	5	2	1	45	80	68	3	4	5	consensus disorder prediction
TRIAE_CS42_2DS_TGACv1_178033_AA0589700	21	20	20	127	77	78	20	11	18	#N/A
TRIAE_CS42_2DS_TGACv1_178036_AA0589740	8	6	8	44	29	23	16	19	12	#N/A
TRIAE_CS42_2DS_TGACv1_178063_AA0590140	0	0	0	7	9	14	2	0	0	#N/A
TRIAE_CS42_2DS_TGACv1_178073_AA0590270	12	18	13	262	284	207	19	17	17	Protein of unknown function DUF2921
TRIAE_CS42_2DS_TGACv1_178077_AA0590340	1	2	1	11	14	8	0	0	2	consensus disorder prediction
TRIAE_CS42_2DS_TGACv1_178157_AA0592020	302	278	206	1970	1055	1668	562	190	223	L-Aspartase-like
TRIAE_CS42_2DS_TGACv1_178240_AA0593350	373	422	440	6682	4432	4982	1400	793	687	Six-bladed beta-propeller, TolB-like
TRIAE_CS42_2DS_TGACv1_178332_AA0594230	76	38	32	332	320	291	30	22	22	#N/A
TRIAE_CS42_2DS_TGACv1_178348_AA0594350	1	0	3	19	9	10	1	0	0	Cytochrome P450
TRIAE_CS42_2DS_TGACv1_178366_AA0594640	46	37	29	388	123	180	38	46	93	Six-bladed beta-propeller, TolB-like
TRIAE_CS42_2DS_TGACv1_178414_AA0595260	138	192	148	860	935	686	648	359	243	consensus disorder prediction
TRIAE_CS42_2DS_TGACv1_178484_AA0596190	572	483	774	4625	2731	3149	1534	1225	1487	consensus disorder prediction
TRIAE_CS42_2DS_TGACv1_178493_AA0596360	6	8	3	40	23	33	7	4	8	#N/A
TRIAE_CS42_2DS_TGACv1_178525_AA0597060	1	2	2	34	10	10	1	1	4	Alpha/beta hydrolase fold-1
TRIAE_CS42_2DS_TGACv1_178581_AA0597760	437	439	580	13903	7706	10624	3777	1105	1058	#N/A
TRIAE_CS42_2DS_TGACv1_178743_AA0600410	14	41	19	244	213	213	98	19	20	consensus disorder prediction
TRIAE_CS42_2DS_TGACv1_178770_AA0600750	2	0	0	9	11	9	1	1	0	FAS1 domain
TRIAE_CS42_2DS_TGACv1_178809_AA0601240	1	1	4	25	8	20	50	4	10	WRKY domain
TRIAE_CS42_2DS_TGACv1_178822_AA0601370	600	574	644	4221	2062	3644	965	351	446	Mlo-related protein
TRIAE_CS42_2DS_TGACv1_178829_AA0601440	506	645	629	10090	6355	7782	946	976	1106	Triose phosphate/phosphoenolpyruvate translocator
TRIAE_CS42_2DS_TGACv1_178845_AA0601700	12	16	15	241	57	74	22	18	10	Cytochrome P450
TRIAE_CS42_2DS_TGACv1_178855_AA0601830	289	318	166	3406	1531	2225	693	203	177	#N/A
TRIAE_CS42_2DS_TGACv1_178955_AA0602750	35	28	27	201	131	163	131	69	108	STKc_IRAK
TRIAE_CS42_2DS_TGACv1_179054_AA0603960	78	75	64	2915	1312	1856	392	155	182	Leucine-rich repeat
TRIAE_CS42_2DS_TGACv1_179091_AA0604270	51	38	35	627	186	343	137	59	115	WRKY domain
TRIAE_CS42_2DS_TGACv1_179236_AA0605530	96	7	20	1703	981	1070	47	8	44	consensus disorder prediction
TRIAE_CS42_2DS_TGACv1_179632_AA0608330	21	13	9	146	244	152	11	20	19	consensus disorder prediction
TRIAE_CS42_2DS_TGACv1_179635_AA0608340	2	1	4	99	35	77	60	13	14	Aspartic peptidase, active site
TRIAE_CS42_2DS_TGACv1_179954_AA0609730	82	120	100	495	465	297	124	109	58	consensus disorder prediction
TRIAE_CS42_2DS_TGACv1_180394_AA0610870	10	11	13	129	117	85	36	14	11	#N/A
TRIAE_CS42_3AL_TGACv1_193613_AA0615060	106	83	63	622	226	386	161	80	143	Xylanase inhibitor, C-terminal
TRIAE_CS42_3AL_TGACv1_193654_AA0616360	433	405	462	2657	1973	2896	1109	1004	957	Inorganic polyphosphate/ATP-NAD kinase, domain 1
TRIAE_CS42_3AL_TGACv1_193668_AA0617190	171	37	86	771	286	430	30	37	91	AP2/ERF domain
TRIAE_CS42_3AL_TGACv1_193689_AA0617590	1111	1307	1123	7047	5509	6081	2222	1639	1783	Zinc finger, RING/FYVE/PHD-type
TRIAE_CS42_3AL_TGACv1_193705_AA0618130	25	29	31	153	161	117	59	43	38	Coiled-coil domain containing protein 109, C-terminal
TRIAE_CS42_3AL_TGACv1_193724_AA0618530	572	347	322	3997	3074	3048	1462	1039	1326	consensus disorder prediction
TRIAE_CS42_3AL_TGACv1_193734_AA0618700	84	68	48	292	285	271	64	53	35	Cytochrome P450
TRIAE_CS42_3AL_TGACv1_193814_AA0620140	96	122	91	511	583	483	235	148	134	consensus disorder prediction
TRIAE_CS42_3AL_TGACv1_193821_AA0620220	3	2	1	73	47	54	3	0	2	NAC domain
TRIAE_CS42_3AL_TGACv1_193824_AA0620280	46	56	43	357	183	244	215	70	110	EF-hand domain
TRIAE_CS42_3AL_TGACv1_193846_AA0620840	16	32	12	1720	1245	1248	98	14	10	ABC transporter-like
TRIAE_CS42_3AL_TGACv1_193875_AA0621500	76	98	81	417	383	334	362	201	181	#N/A
TRIAE_CS42_3AL_TGACv1_193894_AA0622090	15	5	7	73	80	61	6	12	11	SANT/Myb domain
TRIAE_CS42_3AL_TGACv1_193897_AA0622120	4	16	8	1223	1381	826	117	17	41	ABC transporter-like
TRIAE_CS42_3AL_TGACv1_193915_AA0622510	1511	1094	1307	8989	4904	8402	2503	1305	1535	ABC transporter, conserved site
TRIAE_CS42_3AL_TGACv1_193926_AA0622680	1	0	1	12	10	17	1	3	0	consensus disorder prediction
TRIAE_CS42_3AL_TGACv1_193938_AA0622990	51	69	37	735	292	428	143	98	61	consensus disorder prediction
TRIAE_CS42_3AL_TGACv1_193940_AA0623110	0	0	0	8	3	7	3	1	1	CBS domain
TRIAE_CS42_3AL_TGACv1_193959_AA0623510	134	178	135	1531	1397	1625	103	99	65	Uroporphyrin-III C-methyltransferase
TRIAE_CS42_3AL_TGACv1_194017_AA0624640	7	6	11	75	96	90	852	101	120	consensus disorder prediction
TRIAE_CS42_3AL_TGACv1_194017_AA0624650	1	0	3	16	22	20	65	1	10	RING
TRIAE_CS42_3AL_TGACv1_194047_AA0625340	7	6	5	193	178	159	91	22	13	consensus disorder prediction
TRIAE_CS42_3AL_TGACv1_194089_AA0626100	226	35	76	759	468	728	184	113	163	#N/A
TRIAE_CS42_3AL_TGACv1_194141_AA0627340	64	58	93	489	295	243	285	218	138	ABA/WDS induced protein
TRIAE_CS42_3AL_TGACv1_194150_AA0627490	1	0	0	8	6	8	2	0	0	BTB/POZ domain
TRIAE_CS42_3AL_TGACv1_194166_AA0627760	55	14	25	578	395	403	84	40	89	#N/A
TRIAE_CS42_3AL_TGACv1_194173_AA0627900	5	1	13	156	46	49	11	22	8	consensus disorder prediction
TRIAE_CS42_3AL_TGACv1_194180_AA0627980	3	3	4	37	34	38	1	4	0	consensus disorder prediction
TRIAE_CS42_3AL_TGACv1_194229_AA0629090	17	19	13	77	84	61	30	18	11	consensus disorder prediction
TRIAE_CS42_3AL_TGACv1_194243_AA0629540	1	1	0	9	3	15	50	1	8	consensus disorder prediction
TRIAE_CS42_3AL_TGACv1_194305_AA0630850	135	27	73	1557	748	1022	149	73	104	Late embryogenesis abundant protein, LEA-14
TRIAE_CS42_3AL_TGACv1_194379_AA0632150	9	15	8	51	32	63	15	14	10	consensus disorder prediction
TRIAE_CS42_3AL_TGACv1_194402_AA0632510	0	5	5	29	16	16	13	8	6	Transposase (putative), gypsy type
TRIAE_CS42_3AL_TGACv1_194419_AA0632670	117	105	112	572	379	501	317	234	170	50S ribosomal protein L30e-like
TRIAE_CS42_3AL_TGACv1_194453_AA0633390	2039	1555	1530	10834	5395	9493	1772	669	626	ABC-transporter extracellular N-terminal domain
TRIAE_CS42_3AL_TGACv1_194463_AA0633520	233	303	210	1451	845	1099	1009	746	569	consensus disorder prediction
TRIAE_CS42_3AL_TGACv1_194468_AA0633610	8	14	15	72	49	59	11	12	4	Ammonium transporter, conserved site
TRIAE_CS42_3AL_TGACv1_194473_AA0633690	506	476	461	4400	2887	4099	1549	1145	1336	Mitochondrial substrate/solute carrier
TRIAE_CS42_3AL_TGACv1_194480_AA0633830	0	2	0	11	6	10	2	0	3	#N/A
TRIAE_CS42_3AL_TGACv1_194518_AA0634800	330	324	272	2171	1100	1465	475	275	273	Myc-type, basic helix-loop-helix (bHLH) domain
TRIAE_CS42_3AL_TGACv1_194518_AA0634810	2	1	1	27	15	12	10	6	4	#N/A
TRIAE_CS42_3AL_TGACv1_194635_AA0637090	1	4	1	30	17	27	2	3	1	C2 domain
TRIAE_CS42_3AL_TGACv1_194675_AA0637580	2	3	0	46	29	42	5	3	0	Winged helix-turn-helix DNA-binding domain
TRIAE_CS42_3AL_TGACv1_194877_AA0641230	6	4	2	18	17	16	2	5	2	consensus disorder prediction
TRIAE_CS42_3AL_TGACv1_194913_AA0641980	5	8	10	55	45	57	22	12	20	Phospholipase/carboxylesterase/thioesterase
TRIAE_CS42_3AL_TGACv1_194959_AA0642710	2	6	2	187	168	112	16	4	4	Heat shock protein 70kD, peptide-binding domain
TRIAE_CS42_3AL_TGACv1_194972_AA0642950	5	0	3	26	33	18	12	6	4	#N/A
TRIAE_CS42_3AL_TGACv1_195100_AA0644750	18	15	14	92	59	61	35	24	22	#N/A
TRIAE_CS42_3AL_TGACv1_195180_AA0645890	4	5	3	20	23	13	9	3	6	Leucine-rich repeat-containing N-terminal, plant-type
TRIAE_CS42_3AL_TGACv1_195181_AA0646000	7	2	8	23	45	41	1	5	0	consensus disorder prediction
TRIAE_CS42_3AL_TGACv1_195181_AA0646020	1024	1122	1110	5640	5394	5789	2679	2454	2356	DHS-like NAD/FAD-binding domain
TRIAE_CS42_3AL_TGACv1_195286_AA0647420	271	218	261	1469	1026	1197	886	525	642	Serine-threonine/tyrosine-protein kinase catalytic domain
TRIAE_CS42_3AL_TGACv1_195333_AA0648190	0	0	0	7	14	12	1	1	0	ABC transporter type 1, transmembrane domain
TRIAE_CS42_3AL_TGACv1_195369_AA0648630	6	4	3	28	19	21	3	4	3	AAA-type ATPase, N-terminal domain
TRIAE_CS42_3AL_TGACv1_195474_AA0650000	6	2	6	36	21	20	1	0	2	Endo-1,3(4)-beta-glucanase
TRIAE_CS42_3AL_TGACv1_195515_AA0650390	12	10	5	62	13	54	5	3	5	Peptidase S10, serine carboxypeptidase
TRIAE_CS42_3AL_TGACv1_195536_AA0650830	11	6	5	115	83	73	17	7	16	#N/A
TRIAE_CS42_3AL_TGACv1_195550_AA0651040	588	594	509	5913	3095	3485	757	1309	1539	Protein kinase domain
TRIAE_CS42_3AL_TGACv1_195550_AA0651050	108	81	86	1057	351	772	97	86	70	Wall-associated receptor kinase, C-terminal
TRIAE_CS42_3AL_TGACv1_195599_AA0651710	4	3	5	63	47	39	8	1	6	#N/A
TRIAE_CS42_3AL_TGACv1_195604_AA0651830	24	40	55	502	278	438	96	17	36	consensus disorder prediction
TRIAE_CS42_3AL_TGACv1_195607_AA0651870	11	7	10	111	44	110	186	8	21	consensus disorder prediction
TRIAE_CS42_3AL_TGACv1_195607_AA0651880	0	0	0	13	11	21	24	1	4	consensus disorder prediction
TRIAE_CS42_3AL_TGACv1_195613_AA0651930	1315	738	822	13112	8923	8634	1937	1031	1224	consensus disorder prediction
TRIAE_CS42_3AL_TGACv1_195712_AA0653010	7	5	6	108	174	162	74	17	10	Glutathione S-transferase, C-terminal-like
TRIAE_CS42_3AL_TGACv1_195712_AA0653020	2	0	2	54	88	56	58	3	11	Glutathione S-transferase, C-terminal-like
TRIAE_CS42_3AL_TGACv1_195852_AA0654840	10	8	4	91	145	112	20	16	7	Ovate protein family, C-terminal
TRIAE_CS42_3AL_TGACv1_195978_AA0656100	13	3	4	36	23	38	28	15	23	Zinc finger, C2H2
TRIAE_CS42_3AL_TGACv1_196062_AA0656950	242	209	203	3173	2160	2158	685	631	438	nsLTP_like
TRIAE_CS42_3AL_TGACv1_196076_AA0657130	176	153	144	3943	3323	3429	405	190	224	ClpA/B, conserved site 2
TRIAE_CS42_3AL_TGACv1_196147_AA0657630	65	42	42	837	499	567	131	70	131	NAC domain
TRIAE_CS42_3AL_TGACv1_196305_AA0659290	1632	444	677	6718	5310	5031	639	326	558	Zinc finger, CCCH-type
TRIAE_CS42_3AL_TGACv1_196334_AA0659570	0	1	0	14	9	10	0	0	0	WRKY domain
TRIAE_CS42_3AL_TGACv1_196439_AA0660410	774	675	634	4331	2200	2982	856	602	757	#N/A
TRIAE_CS42_3AL_TGACv1_196513_AA0661010	9	14	7	59	38	43	21	17	11	Leucine-rich repeat domain, L domain-like
TRIAE_CS42_3AL_TGACv1_196835_AA0663200	185	45	68	695	378	407	93	64	105	Probable zinc-ribbon domain, plant
TRIAE_CS42_3AL_TGACv1_197146_AA0665090	5	2	1	30	11	10	0	0	1	consensus disorder prediction
TRIAE_CS42_3AL_TGACv1_197445_AA0666300	1	2	4	74	43	57	4	1	2	#N/A
TRIAE_CS42_3AL_TGACv1_197487_AA0666460	162	86	136	3459	1401	2330	369	151	183	consensus disorder prediction
TRIAE_CS42_3AL_TGACv1_197633_AA0666880	1	0	0	17	17	9	0	0	1	#N/A
TRIAE_CS42_3AL_TGACv1_197688_AA0666980	3	9	5	59	25	35	28	4	5	consensus disorder prediction
TRIAE_CS42_3AL_TGACv1_197911_AA0667580	410	528	484	6199	3099	4695	1124	544	632	Transcription factor GRAS
TRIAE_CS42_3AL_TGACv1_198101_AA0667980	53	28	18	204	123	237	15	4	23	consensus disorder prediction
TRIAE_CS42_3AL_TGACv1_198518_AA0668780	160	62	67	1101	642	625	94	43	67	Myc-type, basic helix-loop-helix (bHLH) domain
TRIAE_CS42_3AL_TGACv1_200876_AA0670290	34	22	50	5504	2275	4794	184	22	129	consensus disorder prediction
TRIAE_CS42_3AL_TGACv1_206458_AA0671130	129	117	81	874	252	672	179	94	98	Wall-associated receptor kinase, galacturonan-binding domain
TRIAE_CS42_3AS_TGACv1_210467_AA0672790	83	111	101	1198	754	1026	223	274	260	#N/A
TRIAE_CS42_3AS_TGACv1_210485_AA0673140	960	971	875	6510	3743	4552	3172	2608	3068	WRKY domain
TRIAE_CS42_3AS_TGACv1_210620_AA0675830	119	121	115	822	545	629	243	225	275	#N/A
TRIAE_CS42_3AS_TGACv1_210772_AA0678670	0	0	1	6	6	7	1	0	1	Phosphoenolpyruvate carboxylase, bacterial/plant-type
TRIAE_CS42_3AS_TGACv1_210796_AA0679220	368	382	406	2269	1269	1726	565	648	773	consensus disorder prediction
TRIAE_CS42_3AS_TGACv1_210800_AA0679390	0	0	1	115	153	110	7	3	6	Alpha crystallin/Hsp20 domain
TRIAE_CS42_3AS_TGACv1_210823_AA0679710	10	17	11	74	47	46	31	33	25	#N/A
TRIAE_CS42_3AS_TGACv1_210851_AA0680220	16	11	7	58	46	39	17	15	16	Chromo/chromo shadow domain
TRIAE_CS42_3AS_TGACv1_210855_AA0680350	3	3	5	62	57	45	28	11	7	Serine/threonine-protein kinase, active site
TRIAE_CS42_3AS_TGACv1_210857_AA0680370	970	1110	1237	7712	6083	6761	2468	2790	3032	Malic enzyme, NAD-binding
TRIAE_CS42_3AS_TGACv1_210938_AA0681650	5	6	7	30	28	34	119	15	19	#N/A
TRIAE_CS42_3AS_TGACv1_211024_AA0683300	6	8	3	26	48	37	22	11	13	consensus disorder prediction
TRIAE_CS42_3AS_TGACv1_211027_AA0683460	16	0	3	319	410	287	13	1	12	consensus disorder prediction
TRIAE_CS42_3AS_TGACv1_211035_AA0683560	117	83	69	496	379	288	74	140	96	NPR1/NH1-interacting protein
TRIAE_CS42_3AS_TGACv1_211035_AA0683590	54	21	66	341	150	230	68	66	59	consensus disorder prediction
TRIAE_CS42_3AS_TGACv1_211101_AA0685100	7	13	7	97	126	110	566	116	58	#N/A
TRIAE_CS42_3AS_TGACv1_211210_AA0686750	301	81	151	3455	1948	2655	62	49	62	CALMODULIN-BINDING PROTEIN60
TRIAE_CS42_3AS_TGACv1_211278_AA0687970	13	7	1	46	25	36	15	9	11	consensus disorder prediction
TRIAE_CS42_3AS_TGACv1_211317_AA0688550	61	58	74	679	456	583	58	96	64	Ankyrin repeat
TRIAE_CS42_3AS_TGACv1_211381_AA0689460	93	101	63	720	541	578	139	52	50	Phenazine biosynthesis PhzF protein
TRIAE_CS42_3AS_TGACv1_211403_AA0689800	1385	1534	1437	22401	11896	18587	2381	1057	965	ABC transporter type 1, transmembrane domain
TRIAE_CS42_3AS_TGACv1_211522_AA0691080	1	3	1	16	9	9	9	1	1	consensus disorder prediction
TRIAE_CS42_3AS_TGACv1_211536_AA0691310	3	2	1	28	12	25	4	3	4	consensus disorder prediction
TRIAE_CS42_3AS_TGACv1_211550_AA0691360	32	25	27	197	64	116	42	41	46	Protein of unknown function DUF538
TRIAE_CS42_3AS_TGACv1_211593_AA0692010	1	0	0	152	22	71	1	0	0	Chloramphenicol acetyltransferase-like domain
TRIAE_CS42_3AS_TGACv1_211639_AA0692470	0	0	0	5	5	11	4	0	1	Serine carboxypeptidases, histidine active site
TRIAE_CS42_3AS_TGACv1_211763_AA0693870	11	0	0	30	14	45	10	3	7	consensus disorder prediction
TRIAE_CS42_3AS_TGACv1_211771_AA0694050	378	472	487	2550	1526	1935	440	286	388	#N/A
TRIAE_CS42_3AS_TGACv1_211831_AA0694820	80	12	37	266	80	235	3	9	11	Protein kinase domain
TRIAE_CS42_3AS_TGACv1_211880_AA0695200	330	343	327	1680	1298	1473	632	568	650	consensus disorder prediction
TRIAE_CS42_3AS_TGACv1_212044_AA0697140	6	12	16	157	306	197	1127	101	42	Cytochrome P450
TRIAE_CS42_3AS_TGACv1_212205_AA0698780	7	2	6	84	97	72	29	6	7	B3 DNA binding domain
TRIAE_CS42_3AS_TGACv1_212205_AA0698790	4	3	2	169	129	112	32	7	7	DNA-binding pseudobarrel domain
TRIAE_CS42_3AS_TGACv1_212205_AA0698800	63	57	74	332	260	265	309	59	85	Aminoacyl-tRNA synthetase, class Ia, anticodon-binding
TRIAE_CS42_3AS_TGACv1_212223_AA0698940	0	0	0	12	4	3	0	1	0	Malectin-like carbohydrate-binding domain
TRIAE_CS42_3AS_TGACv1_212306_AA0699780	517	592	678	3099	3123	2663	382	465	399	Peroxidase, active site
TRIAE_CS42_3AS_TGACv1_212432_AA0700820	176	119	86	997	277	503	124	30	30	WRKY domain
TRIAE_CS42_3AS_TGACv1_212675_AA0702590	108	159	238	1663	1182	1276	506	466	583	#N/A
TRIAE_CS42_3AS_TGACv1_212755_AA0703100	1	0	1	136	223	152	47	6	12	#N/A
TRIAE_CS42_3B_TGACv1_220612_AA0711300	9	14	7	83	39	68	16	11	12	Domain of unknown function DUF1618
TRIAE_CS42_3B_TGACv1_220697_AA0715830	81	58	58	529	208	443	330	162	195	#N/A
TRIAE_CS42_3B_TGACv1_220733_AA0717520	0	0	0	11	3	4	0	0	0	Myb domain
TRIAE_CS42_3B_TGACv1_220740_AA0717700	4	7	3	30	14	27	10	1	1	consensus disorder prediction
TRIAE_CS42_3B_TGACv1_220748_AA0717950	89	80	63	595	511	417	111	92	86	Zinc finger, Dof-type
TRIAE_CS42_3B_TGACv1_220776_AA0718880	3	8	4	33	23	22	1	0	2	NB-ARC
TRIAE_CS42_3B_TGACv1_220791_AA0719280	2	4	6	66	49	36	5	3	7	Serine-threonine/tyrosine-protein kinase catalytic domain
TRIAE_CS42_3B_TGACv1_220813_AA0719980	0	0	0	14	16	9	3	1	1	Tubby C-terminal-like domain
TRIAE_CS42_3B_TGACv1_220813_AA0720010	695	788	763	4770	4029	4755	1176	1187	1047	Thiamin diphosphate-binding fold
TRIAE_CS42_3B_TGACv1_220835_AA0720840	3	5	1	25	9	9	18	4	6	S-receptor-like serine/threonine-protein kinase
TRIAE_CS42_3B_TGACv1_220838_AA0721030	29	16	77	246	331	320	94	63	79	SGNH hydrolase-type esterase domain
TRIAE_CS42_3B_TGACv1_220847_AA0721180	54	54	61	976	472	633	74	39	18	Amidohydrolase
TRIAE_CS42_3B_TGACv1_220884_AA0722480	40	76	86	877	483	732	258	83	102	consensus disorder prediction
TRIAE_CS42_3B_TGACv1_220906_AA0723340	10	8	16	169	49	77	44	11	17	Myb domain
TRIAE_CS42_3B_TGACv1_220906_AA0723360	3	4	2	110	37	62	40	13	6	consensus disorder prediction
TRIAE_CS42_3B_TGACv1_220919_AA0723700	2	6	7	61	55	87	327	28	14	#N/A
TRIAE_CS42_3B_TGACv1_220967_AA0725330	0	1	0	8	6	8	1	1	1	Tubby C-terminal-like domain
TRIAE_CS42_3B_TGACv1_220977_AA0725540	139	142	169	893	507	719	180	155	166	#N/A
TRIAE_CS42_3B_TGACv1_220977_AA0725550	0	0	0	14	12	8	2	0	0	#N/A
TRIAE_CS42_3B_TGACv1_220982_AA0725790	9	10	12	65	102	158	895	57	40	#N/A
TRIAE_CS42_3B_TGACv1_220994_AA0726170	65	71	86	473	384	347	59	35	85	consensus disorder prediction
TRIAE_CS42_3B_TGACv1_221004_AA0726490	93	54	75	1850	892	1149	184	159	196	consensus disorder prediction
TRIAE_CS42_3B_TGACv1_221026_AA0727320	6	2	0	14	12	16	11	11	6	#N/A
TRIAE_CS42_3B_TGACv1_221027_AA0727390	1	3	3	14	23	12	12	7	10	consensus disorder prediction
TRIAE_CS42_3B_TGACv1_221045_AA0728060	22	21	33	237	170	241	332	47	67	EF-hand domain
TRIAE_CS42_3B_TGACv1_221078_AA0729520	0	0	0	86	119	96	3	0	6	Alpha crystallin/Hsp20 domain
TRIAE_CS42_3B_TGACv1_221078_AA0729530	1	0	0	13	21	18	4	1	1	HSP20-like chaperone
TRIAE_CS42_3B_TGACv1_221102_AA0730380	374	395	430	2104	1464	1597	270	302	369	AUX/IAA domain
TRIAE_CS42_3B_TGACv1_221133_AA0731430	27	20	17	119	101	68	52	48	43	SIAH-type domain
TRIAE_CS42_3B_TGACv1_221166_AA0732680	280	349	507	2707	1470	2861	2751	395	521	Cytochrome P450, E-class, group I
TRIAE_CS42_3B_TGACv1_221169_AA0732720	66	24	29	343	240	249	38	19	40	EF-hand domain
TRIAE_CS42_3B_TGACv1_221225_AA0734360	664	179	267	4244	3047	3410	513	292	474	consensus disorder prediction
TRIAE_CS42_3B_TGACv1_221246_AA0735050	10	6	9	95	226	98	125	31	30	GST_N_Tau
TRIAE_CS42_3B_TGACv1_221256_AA0735320	115	88	130	487	565	404	66	70	72	Glycoside hydrolase superfamily
TRIAE_CS42_3B_TGACv1_221263_AA0735540	0	0	1	4	8	7	14	1	0	F-box domain
TRIAE_CS42_3B_TGACv1_221369_AA0738560	20	4	15	107	39	121	10	1	4	C2_putative_Elicitor-responsive_gene
TRIAE_CS42_3B_TGACv1_221402_AA0739710	11	2	2	22	27	18	3	6	4	Leucine-rich repeat, typical subtype
TRIAE_CS42_3B_TGACv1_221413_AA0740140	1	0	2	13	20	21	0	0	1	Concanavalin A-like lectin/glucanase domain
TRIAE_CS42_3B_TGACv1_221438_AA0740810	44	43	39	254	196	215	125	58	42	SANT
TRIAE_CS42_3B_TGACv1_221448_AA0741230	3	1	5	70	13	63	6	2	2	C2 domain
TRIAE_CS42_3B_TGACv1_221485_AA0741810	4	16	3	48	29	29	0	1	2	Zinc finger, CCCH-type
TRIAE_CS42_3B_TGACv1_221577_AA0744710	95	74	87	703	436	515	152	125	85	O-fucosyltransferase, plant
TRIAE_CS42_3B_TGACv1_221646_AA0746500	323	148	235	3793	1743	2688	727	291	403	consensus disorder prediction
TRIAE_CS42_3B_TGACv1_221653_AA0746630	2	3	1	13	7	21	0	0	4	Tubby C-terminal-like domain
TRIAE_CS42_3B_TGACv1_221667_AA0747000	0	0	0	5	5	8	0	0	0	#N/A
TRIAE_CS42_3B_TGACv1_221681_AA0747370	94	31	65	3272	2558	2895	92	61	95	#N/A
TRIAE_CS42_3B_TGACv1_221701_AA0747880	4	1	0	30	20	13	1	0	1	WRKY domain
TRIAE_CS42_3B_TGACv1_221753_AA0749240	25	2	3	59	43	47	14	4	10	consensus disorder prediction
TRIAE_CS42_3B_TGACv1_221754_AA0749260	2	8	6	39	30	34	7	4	6	consensus disorder prediction
TRIAE_CS42_3B_TGACv1_221806_AA0750230	1	0	3	57	103	77	7	0	9	Alpha crystallin/Hsp20 domain
TRIAE_CS42_3B_TGACv1_221836_AA0750990	3	1	4	20	16	11	8	2	0	Wall-associated receptor kinase, galacturonan-binding domain
TRIAE_CS42_3B_TGACv1_221845_AA0751560	63	36	59	331	399	309	3108	196	176	Alpha/beta hydrolase fold-3
TRIAE_CS42_3B_TGACv1_221850_AA0751680	12	6	18	178	202	253	527	75	57	consensus disorder prediction
TRIAE_CS42_3B_TGACv1_221924_AA0753300	734	700	753	4699	2312	4411	3821	952	1455	#N/A
TRIAE_CS42_3B_TGACv1_221946_AA0753740	1	3	1	22	33	57	17	5	0	Alternative oxidase
TRIAE_CS42_3B_TGACv1_221983_AA0754430	0	3	2	14	9	11	3	1	4	#N/A
TRIAE_CS42_3B_TGACv1_222057_AA0756260	1368	1012	1332	7302	4245	5953	1262	1614	1826	Exostosin-like
TRIAE_CS42_3B_TGACv1_222064_AA0756550	76	70	84	535	463	446	31	46	31	#N/A
TRIAE_CS42_3B_TGACv1_222094_AA0757180	0	1	1	43	72	52	0	3	6	HSP20-like chaperone
TRIAE_CS42_3B_TGACv1_222109_AA0757480	53	63	62	1839	1905	1760	253	95	162	ClpA/B, conserved site 2
TRIAE_CS42_3B_TGACv1_222163_AA0758700	0	0	0	19	8	14	1	0	0	#N/A
TRIAE_CS42_3B_TGACv1_222169_AA0758800	456	585	465	2834	1720	2087	1380	1790	1870	#N/A
TRIAE_CS42_3B_TGACv1_222181_AA0759180	2	0	2	50	58	53	1	1	0	Protein kinase domain
TRIAE_CS42_3B_TGACv1_222189_AA0759400	26	23	35	196	118	118	71	72	45	Protein of unknown function DUF1639
TRIAE_CS42_3B_TGACv1_222291_AA0761390	0	0	1	14	14	10	95	0	0	SLC26A/SulP transporter
TRIAE_CS42_3B_TGACv1_222340_AA0762490	605	599	644	19582	9274	15654	1476	476	484	consensus disorder prediction
TRIAE_CS42_3B_TGACv1_222377_AA0763460	8	5	7	66	19	47	0	5	5	consensus disorder prediction
TRIAE_CS42_3B_TGACv1_222565_AA0766860	11	10	19	5034	3063	3202	73	8	6	#N/A
TRIAE_CS42_3B_TGACv1_222607_AA0767670	29	39	37	281	132	178	103	24	33	Ammonium transporter AmtB-like domain
TRIAE_CS42_3B_TGACv1_222610_AA0767750	7	3	1	113	32	31	7	2	3	Zinc finger, RING/FYVE/PHD-type
TRIAE_CS42_3B_TGACv1_222629_AA0768190	3	1	3	7	23	22	219	30	10	Flavoprotein-like domain
TRIAE_CS42_3B_TGACv1_222667_AA0768720	39	27	23	298	143	173	61	25	21	3-beta hydroxysteroid dehydrogenase/isomerase
TRIAE_CS42_3B_TGACv1_222766_AA0770260	5	9	5	100	67	70	21	22	15	Seven-in-absentia protein, TRAF-like domain
TRIAE_CS42_3B_TGACv1_222793_AA0770880	124	151	82	5339	4373	3456	275	81	76	Nucleic acid-binding, OB-fold
TRIAE_CS42_3B_TGACv1_222876_AA0772270	1	0	2	8	16	16	1	1	2	#N/A
TRIAE_CS42_3B_TGACv1_222884_AA0772510	10	3	6	207	207	181	16	2	7	#N/A
TRIAE_CS42_3B_TGACv1_222972_AA0774440	305	306	347	2518	1599	2278	914	775	908	Mitochondrial substrate/solute carrier
TRIAE_CS42_3B_TGACv1_222986_AA0774630	1044	1084	1160	8741	7479	7543	2512	2683	3059	consensus disorder prediction
TRIAE_CS42_3B_TGACv1_222993_AA0774750	1	3	2	28	8	25	14	14	49	consensus disorder prediction
TRIAE_CS42_3B_TGACv1_223009_AA0775160	2679	1095	1448	9835	8386	7628	1154	719	1076	Zinc finger, CCCH-type
TRIAE_CS42_3B_TGACv1_223075_AA0776100	0	0	0	12	8	12	0	0	0	consensus disorder prediction
TRIAE_CS42_3B_TGACv1_223119_AA0776710	27	10	15	614	456	457	13	12	15	Inhibitor of apoptosis-promoting Bax1
TRIAE_CS42_3B_TGACv1_223177_AA0777490	2	0	1	36	36	26	4	4	0	Reverse transcriptase domain
TRIAE_CS42_3B_TGACv1_223262_AA0779300	246	220	262	1511	830	992	404	437	430	consensus disorder prediction
TRIAE_CS42_3B_TGACv1_223275_AA0779450	133	220	113	1210	615	1022	750	438	433	WRKY domain
TRIAE_CS42_3B_TGACv1_223511_AA0783220	1	0	2	16	7	24	0	1	4	Inhibitor of apoptosis-promoting Bax1
TRIAE_CS42_3B_TGACv1_223519_AA0783390	328	328	242	1644	909	1376	937	794	866	Cytochrome P450, conserved site
TRIAE_CS42_3B_TGACv1_223549_AA0783710	16	12	17	61	70	58	16	25	11	#N/A
TRIAE_CS42_3B_TGACv1_223712_AA0785980	26	16	17	108	59	97	254	87	46	#N/A
TRIAE_CS42_3B_TGACv1_223800_AA0787600	39	31	33	219	201	183	67	35	50	#N/A
TRIAE_CS42_3B_TGACv1_223830_AA0788140	0	4	0	18	14	7	4	3	4	Domain of unknown function DUF1618
TRIAE_CS42_3B_TGACv1_223970_AA0790390	747	558	525	5363	2249	4914	840	252	291	ABC-transporter extracellular N-terminal domain
TRIAE_CS42_3B_TGACv1_223993_AA0790600	201	186	195	980	725	926	335	326	368	EF-hand domain
TRIAE_CS42_3B_TGACv1_224046_AA0791510	161	187	193	1063	1017	785	583	570	359	Heavy metal-associated domain, HMA
TRIAE_CS42_3B_TGACv1_224066_AA0791870	0	0	1	10	4	7	0	0	0	Small auxin-up RNA
TRIAE_CS42_3B_TGACv1_224153_AA0793090	2	7	0	23	12	11	10	19	6	#N/A
TRIAE_CS42_3B_TGACv1_224164_AA0793280	8	3	10	187	49	88	17	1	3	Peptidase S8, subtilisin-related
TRIAE_CS42_3B_TGACv1_224175_AA0793440	13	18	20	142	145	102	7	5	2	WD40-repeat-containing domain
TRIAE_CS42_3B_TGACv1_224195_AA0793700	4	15	11	74	58	71	23	11	15	consensus disorder prediction
TRIAE_CS42_3B_TGACv1_224199_AA0793780	287	220	196	3299	1405	2138	222	181	274	MATE_eukaryotic
TRIAE_CS42_3B_TGACv1_224323_AA0795250	331	243	396	1733	1188	1329	892	295	279	Protein of unknown function PDDEXK-like
TRIAE_CS42_3B_TGACv1_224332_AA0795380	0	0	0	18	37	27	14	0	1	Cytochrome P450, E-class, group I
TRIAE_CS42_3B_TGACv1_224343_AA0795520	267	262	194	2413	1373	1506	456	739	762	Protein kinase, ATP binding site
TRIAE_CS42_3B_TGACv1_224343_AA0795530	66	51	51	903	325	628	216	119	140	Wall-associated receptor kinase, C-terminal
TRIAE_CS42_3B_TGACv1_224357_AA0795640	12	9	4	122	70	67	11	17	15	Myc-type, basic helix-loop-helix (bHLH) domain
TRIAE_CS42_3B_TGACv1_224416_AA0796570	22	17	49	231	59	191	38	91	80	Pectinesterase, catalytic
TRIAE_CS42_3B_TGACv1_224428_AA0796690	69	25	24	291	246	251	93	11	30	Cytochrome P450
TRIAE_CS42_3B_TGACv1_224563_AA0797980	102	104	115	1670	1709	2152	97	121	83	SUMT
TRIAE_CS42_3B_TGACv1_224652_AA0799410	3	6	13	1280	869	1219	615	19	35	#N/A
TRIAE_CS42_3B_TGACv1_224715_AA0800460	891	1049	1478	7302	3719	8119	6870	1241	1564	Cytochrome P450
TRIAE_CS42_3B_TGACv1_224757_AA0801150	383	435	451	4972	2459	4111	1146	526	670	Transcription factor GRAS
TRIAE_CS42_3B_TGACv1_224782_AA0801470	189	171	187	1030	1068	973	521	407	286	consensus disorder prediction
TRIAE_CS42_3B_TGACv1_224807_AA0801790	793	674	644	4219	2454	3148	2216	1806	2179	WRKY domain
TRIAE_CS42_3B_TGACv1_224947_AA0803460	175	53	65	1117	659	574	149	122	251	consensus disorder prediction
TRIAE_CS42_3B_TGACv1_225014_AA0804100	0	2	7	12	15	20	9	12	9	O-methyltransferase COMT-type
TRIAE_CS42_3B_TGACv1_225015_AA0804150	1	2	0	17	3	10	13	6	4	Protein of unknown function DUF594
TRIAE_CS42_3B_TGACv1_225183_AA0805920	291	226	375	1686	1222	1448	212	237	199	#N/A
TRIAE_CS42_3B_TGACv1_225183_AA0805930	31	23	31	622	437	404	175	51	51	CO dehydrogenase flavoprotein-like, FAD-binding, subdomain 2
TRIAE_CS42_3B_TGACv1_225362_AA0807540	1	1	0	84	112	113	1	3	6	HSP20-like chaperone
TRIAE_CS42_3B_TGACv1_225425_AA0808260	1	1	0	11	7	15	0	4	1	Ubiquitin fusion degradation protein UFD1
TRIAE_CS42_3B_TGACv1_225512_AA0809280	121	110	101	824	586	701	252	297	409	Zinc finger, TAZ-type
TRIAE_CS42_3B_TGACv1_225517_AA0809310	91	42	78	510	517	522	221	200	127	NADPH-dependent FMN reductase-like
TRIAE_CS42_3B_TGACv1_225871_AA0812510	28	84	104	506	357	455	592	38	56	Eukaryotic porin/Tom40
TRIAE_CS42_3B_TGACv1_226127_AA0814160	3	7	1	26	30	15	5	9	5	#N/A
TRIAE_CS42_3B_TGACv1_226158_AA0814320	405	260	247	2382	1575	1921	707	377	482	consensus disorder prediction
TRIAE_CS42_3B_TGACv1_226399_AA0816690	18	16	18	99	94	68	26	38	16	Alpha/Beta hydrolase fold
TRIAE_CS42_3B_TGACv1_226597_AA0817990	0	1	0	11	8	7	0	0	0	Ovate protein family, C-terminal
TRIAE_CS42_3B_TGACv1_226620_AA0818100	1	0	0	68	36	39	0	2	0	WRKY domain
TRIAE_CS42_3B_TGACv1_226713_AA0819000	4	1	0	19	5	9	0	0	0	#N/A
TRIAE_CS42_3B_TGACv1_227011_AA0820740	14	7	12	69	32	47	16	10	24	CBS domain
TRIAE_CS42_3B_TGACv1_227101_AA0821380	63	60	65	317	272	232	110	115	108	ABC transporter type 1, transmembrane domain
TRIAE_CS42_3B_TGACv1_227343_AA0822970	94	100	89	821	916	747	691	131	280	Heat shock protein 70, conserved site
TRIAE_CS42_3B_TGACv1_227390_AA0823200	5	5	6	1062	548	895	40	4	17	consensus disorder prediction
TRIAE_CS42_3B_TGACv1_227460_AA0823450	67	27	26	518	305	274	46	19	37	HLH
TRIAE_CS42_3B_TGACv1_227554_AA0823820	4	3	6	44	18	33	15	7	9	Phytocyanin domain
TRIAE_CS42_3B_TGACv1_227867_AA0824990	5	2	4	38	30	30	13	6	5	Reverse transcriptase domain
TRIAE_CS42_3B_TGACv1_227962_AA0825320	27	0	3	602	551	400	28	5	7	consensus disorder prediction
TRIAE_CS42_3B_TGACv1_228096_AA0825790	0	0	1	9	6	7	4	1	2	Uncharacterised conserved protein UCP031279
TRIAE_CS42_3B_TGACv1_228136_AA0825940	3	3	3	91	36	43	5	1	1	F-box domain
TRIAE_CS42_3B_TGACv1_229159_AA0828290	548	448	412	2435	1472	2161	1358	1467	1712	consensus disorder prediction
TRIAE_CS42_3B_TGACv1_229172_AA0828310	20	7	25	328	765	424	824	193	84	UDP-glucuronosyl/UDP-glucosyltransferase
TRIAE_CS42_3B_TGACv1_229631_AA0828970	55	34	43	419	294	240	18	25	16	consensus disorder prediction
TRIAE_CS42_3B_TGACv1_229834_AA0829190	0	3	7	119	121	162	14	7	2	Peptide Chain Release Factor eRF1/aRF1, N-terminal
TRIAE_CS42_3B_TGACv1_236452_AA0832650	9	11	13	72	38	45	28	21	74	AP2/ERF domain
TRIAE_CS42_3DL_TGACv1_249024_AA0834820	55	65	51	956	1489	980	131	79	119	Clp, N-terminal
TRIAE_CS42_3DL_TGACv1_249075_AA0836780	380	444	377	2714	1648	1886	479	319	278	Multi antimicrobial extrusion protein
TRIAE_CS42_3DL_TGACv1_249140_AA0839370	3	1	4	99	45	47	53	4	17	EF-hand domain
TRIAE_CS42_3DL_TGACv1_249140_AA0839380	17	7	5	309	225	235	228	23	53	EF-hand domain
TRIAE_CS42_3DL_TGACv1_249140_AA0839390	2	0	1	57	34	44	50	5	5	EF-hand domain pair
TRIAE_CS42_3DL_TGACv1_249152_AA0839770	14	3	5	198	71	183	47	0	4	C2 domain
TRIAE_CS42_3DL_TGACv1_249174_AA0840380	9	6	5	49	26	40	6	8	9	#N/A
TRIAE_CS42_3DL_TGACv1_249203_AA0841160	19	63	57	376	93	367	124	86	53	consensus disorder prediction
TRIAE_CS42_3DL_TGACv1_249203_AA0841200	83	47	229	824	399	386	168	259	175	ABA/WDS induced protein
TRIAE_CS42_3DL_TGACv1_249219_AA0841940	485	433	663	3803	2418	3129	1553	764	760	Protein of unknown function PDDEXK-like
TRIAE_CS42_3DL_TGACv1_249244_AA0842980	18	19	27	177	106	117	61	18	22	F-box domain
TRIAE_CS42_3DL_TGACv1_249245_AA0843050	0	2	0	6	6	13	5	1	0	Leucine-rich repeat, typical subtype
TRIAE_CS42_3DL_TGACv1_249255_AA0843310	2	0	0	40	18	18	0	1	1	WRKY domain
TRIAE_CS42_3DL_TGACv1_249271_AA0843790	21	21	7	98	50	65	15	11	4	#N/A
TRIAE_CS42_3DL_TGACv1_249284_AA0844220	0	2	0	15	9	11	4	0	2	#N/A
TRIAE_CS42_3DL_TGACv1_249284_AA0844230	2	2	2	24	33	27	3	4	3	#N/A
TRIAE_CS42_3DL_TGACv1_249294_AA0844470	89	45	59	1273	725	890	131	106	167	NAC domain
TRIAE_CS42_3DL_TGACv1_249309_AA0844910	4	0	1	77	36	60	1	2	7	consensus disorder prediction
TRIAE_CS42_3DL_TGACv1_249357_AA0846460	458	378	395	3045	1840	2156	600	441	591	consensus disorder prediction
TRIAE_CS42_3DL_TGACv1_249383_AA0847210	279	272	281	1344	1053	1360	540	359	398	Winged helix-turn-helix DNA-binding domain
TRIAE_CS42_3DL_TGACv1_249389_AA0847430	141	128	88	1121	509	766	255	97	87	consensus disorder prediction
TRIAE_CS42_3DL_TGACv1_249415_AA0848170	37	29	26	174	131	110	59	45	27	DNA ligase, ATP-dependent, C-terminal
TRIAE_CS42_3DL_TGACv1_249449_AA0849070	8	8	7	74	46	53	6	1	2	#N/A
TRIAE_CS42_3DL_TGACv1_249459_AA0849260	567	319	325	2452	1858	1871	1254	982	1112	WRKY domain
TRIAE_CS42_3DL_TGACv1_249544_AA0851270	0	0	0	13	2	11	0	1	0	Zinc finger, BED-type
TRIAE_CS42_3DL_TGACv1_249618_AA0852770	353	179	179	1402	728	990	196	120	247	consensus disorder prediction
TRIAE_CS42_3DL_TGACv1_249679_AA0854130	13	11	14	94	85	57	6	14	2	consensus disorder prediction
TRIAE_CS42_3DL_TGACv1_249687_AA0854340	306	301	337	2488	1588	2212	776	658	725	Mitochondrial substrate/solute carrier
TRIAE_CS42_3DL_TGACv1_249770_AA0855930	23	2	5	1073	763	831	53	30	93	consensus disorder prediction
TRIAE_CS42_3DL_TGACv1_249773_AA0856010	0	0	0	9	2	7	0	0	1	Serine-threonine/tyrosine-protein kinase catalytic domain
TRIAE_CS42_3DL_TGACv1_249801_AA0856690	59	22	52	3399	2463	2866	183	63	121	#N/A
TRIAE_CS42_3DL_TGACv1_249869_AA0857660	4	8	3	39	34	28	6	9	4	LURP1-related protein domain
TRIAE_CS42_3DL_TGACv1_249869_AA0857670	0	0	0	13	14	11	0	0	1	Tubby C-terminal-like domain
TRIAE_CS42_3DL_TGACv1_249881_AA0857980	363	395	314	1972	1256	1481	716	514	465	STKc_IRAK
TRIAE_CS42_3DL_TGACv1_249949_AA0858950	198	187	287	4167	1722	3443	1626	245	281	#N/A
TRIAE_CS42_3DL_TGACv1_249959_AA0859150	6	5	3	32	25	32	7	2	4	ABC transporter type 1, transmembrane domain
TRIAE_CS42_3DL_TGACv1_249970_AA0859480	16	59	46	1057	355	444	203	105	94	CO dehydrogenase flavoprotein-like, FAD-binding, subdomain 2
TRIAE_CS42_3DL_TGACv1_250038_AA0860940	3	5	15	1096	723	1086	198	18	28	consensus disorder prediction
TRIAE_CS42_3DL_TGACv1_250044_AA0861140	126	67	108	718	178	634	350	191	253	Glutathione S-transferase, C-terminal-like
TRIAE_CS42_3DL_TGACv1_250135_AA0862790	120	116	78	746	1077	674	88	66	65	Protein of unknown function DUF966
TRIAE_CS42_3DL_TGACv1_250205_AA0864250	238	244	437	1436	1283	1647	1065	844	815	consensus disorder prediction
TRIAE_CS42_3DL_TGACv1_250232_AA0864660	7	3	2	26	22	22	2	0	1	consensus disorder prediction
TRIAE_CS42_3DL_TGACv1_250315_AA0866010	340	426	587	10477	5887	7701	1303	393	499	P-loop containing nucleoside triphosphate hydrolase
TRIAE_CS42_3DL_TGACv1_250337_AA0866420	3	1	0	203	103	123	0	1	2	WRKY domain
TRIAE_CS42_3DL_TGACv1_250356_AA0866760	10	18	11	195	138	164	76	10	12	AP2/ERF domain
TRIAE_CS42_3DL_TGACv1_250365_AA0866940	35	10	33	300	501	444	433	110	60	Flavoprotein-like domain
TRIAE_CS42_3DL_TGACv1_250417_AA0867840	1250	845	823	7665	4607	6500	1225	736	928	ABC transporter-like
TRIAE_CS42_3DL_TGACv1_250491_AA0869130	10	18	16	82	90	60	55	46	29	Alpha/Beta hydrolase fold
TRIAE_CS42_3DL_TGACv1_250538_AA0869900	1	2	0	21	6	7	1	0	0	WRKY domain
TRIAE_CS42_3DL_TGACv1_250553_AA0870190	1	4	0	17	12	8	1	2	0	Ubiquitin-conjugating enzyme/RWD-like
TRIAE_CS42_3DL_TGACv1_250602_AA0870940	6	3	4	30	35	33	78	9	21	Zinc finger, C2H2
TRIAE_CS42_3DL_TGACv1_250780_AA0873040	219	99	76	2175	1091	2392	262	71	170	consensus disorder prediction
TRIAE_CS42_3DL_TGACv1_250782_AA0873080	0	0	0	10	5	7	1	0	0	WRKY domain
TRIAE_CS42_3DL_TGACv1_250797_AA0873290	190	238	170	1553	1090	1212	168	260	250	Bifunctional inhibitor/plant lipid transfer protein/seed storage helical domain
TRIAE_CS42_3DL_TGACv1_250810_AA0873500	0	1	1	11	28	15	2	4	0	consensus disorder prediction
TRIAE_CS42_3DL_TGACv1_250810_AA0873510	3	2	1	44	46	38	6	5	2	#N/A
TRIAE_CS42_3DL_TGACv1_250816_AA0873600	211	257	251	1303	870	1109	472	528	794	Zinc finger, TAZ-type
TRIAE_CS42_3DL_TGACv1_250816_AA0873610	74	51	70	452	363	417	182	148	248	Zinc finger, TAZ-type
TRIAE_CS42_3DL_TGACv1_250910_AA0874910	9	2	6	148	34	79	18	1	2	consensus disorder prediction
TRIAE_CS42_3DL_TGACv1_250993_AA0875950	2	0	1	15	4	8	0	0	1	Decaprenyl diphosphate synthase-like
TRIAE_CS42_3DL_TGACv1_251017_AA0876210	0	3	4	34	46	42	1	6	1	Protein kinase-like domain
TRIAE_CS42_3DL_TGACv1_251058_AA0876840	1	4	2	231	236	261	17	5	3	eRF1 domain 3
TRIAE_CS42_3DL_TGACv1_251058_AA0876860	1	1	0	17	15	20	4	7	3	Leucine-rich repeat domain, L domain-like
TRIAE_CS42_3DL_TGACv1_251066_AA0876990	1152	902	1232	6730	3431	5358	3309	1692	2335	RING
TRIAE_CS42_3DL_TGACv1_251066_AA0877000	1	6	7	36	74	67	3	0	0	Amino acid transporter, transmembrane domain
TRIAE_CS42_3DL_TGACv1_251071_AA0877050	13	8	9	67	80	51	16	9	6	#N/A
TRIAE_CS42_3DL_TGACv1_251229_AA0879090	5	4	11	62	113	78	0	2	2	#N/A
TRIAE_CS42_3DL_TGACv1_251270_AA0879500	617	645	605	3863	3581	3786	1260	1374	1245	DHS-like NAD/FAD-binding domain
TRIAE_CS42_3DL_TGACv1_251291_AA0879820	31	27	14	374	366	355	126	49	46	SANT
TRIAE_CS42_3DL_TGACv1_251318_AA0880080	0	0	2	266	361	340	113	7	9	NADPH-dependent FMN reductase-like
TRIAE_CS42_3DL_TGACv1_251355_AA0880580	0	0	1	12	6	11	0	2	2	#N/A
TRIAE_CS42_3DL_TGACv1_251365_AA0880720	95	103	91	1508	1544	1685	45	62	62	Tetrapyrrole methylase
TRIAE_CS42_3DL_TGACv1_251384_AA0881000	30	21	34	136	169	132	21	10	11	WD40 repeat
TRIAE_CS42_3DL_TGACv1_251394_AA0881110	227	102	112	737	688	546	113	196	190	Phosphatase PHOSPHO-type
TRIAE_CS42_3DL_TGACv1_251394_AA0881120	232	86	113	1081	883	745	166	264	264	Phosphatase PHOSPHO-type
TRIAE_CS42_3DL_TGACv1_251440_AA0881490	625	521	532	3164	2086	2723	1045	951	1014	consensus disorder prediction
TRIAE_CS42_3DL_TGACv1_251552_AA0882470	2	2	3	17	16	12	5	5	6	Isopenicillin N synthase-like
TRIAE_CS42_3DL_TGACv1_251689_AA0883880	9	14	10	2550	2123	2207	96	22	19	Glutathione S-transferase, C-terminal-like
TRIAE_CS42_3DL_TGACv1_251733_AA0884370	617	615	672	7276	4177	6402	1806	555	687	#N/A
TRIAE_CS42_3DL_TGACv1_251753_AA0884560	71	69	98	692	471	560	29	19	37	consensus disorder prediction
TRIAE_CS42_3DL_TGACv1_251813_AA0885260	122	57	48	563	288	314	85	68	117	Probable zinc-ribbon domain, plant
TRIAE_CS42_3DL_TGACv1_251869_AA0885580	312	285	228	2181	1229	1340	589	832	1046	Protein kinase domain
TRIAE_CS42_3DL_TGACv1_252066_AA0887390	0	0	0	20	12	4	4	1	5	Aldolase-type TIM barrel
TRIAE_CS42_3DL_TGACv1_252173_AA0888060	0	0	0	10	10	12	0	3	1	Homeodomain-like
TRIAE_CS42_3DL_TGACv1_252247_AA0888810	4	5	12	80	28	56	2	0	3	#N/A
TRIAE_CS42_3DL_TGACv1_252282_AA0889100	1	5	1	179	78	82	163	17	15	STAS domain
TRIAE_CS42_3DL_TGACv1_252316_AA0889290	85	63	53	593	488	510	244	65	62	Cytochrome P450, conserved site
TRIAE_CS42_3DL_TGACv1_252320_AA0889310	167	169	212	1000	876	908	418	326	288	Chloroquine-resistance transporter-like
TRIAE_CS42_3DL_TGACv1_252373_AA0889640	11	0	3	835	460	702	10	0	9	consensus disorder prediction
TRIAE_CS42_3DL_TGACv1_252373_AA0889650	4	1	3	468	254	368	20	5	8	consensus disorder prediction
TRIAE_CS42_3DL_TGACv1_252428_AA0889980	141	123	112	785	358	615	147	109	102	NAD(P)-binding domain
TRIAE_CS42_3DL_TGACv1_252494_AA0890300	3	0	0	168	131	125	9	0	8	#N/A
TRIAE_CS42_3DL_TGACv1_252494_AA0890310	18	13	22	148	80	133	33	23	18	#N/A
TRIAE_CS42_3DL_TGACv1_252556_AA0890650	95	65	136	2684	1567	1970	372	191	365	consensus disorder prediction
TRIAE_CS42_3DL_TGACv1_253076_AA0893270	4	5	11	53	40	31	40	9	10	#N/A
TRIAE_CS42_3DL_TGACv1_253118_AA0893450	31	10	28	256	257	215	34	25	59	consensus disorder prediction
TRIAE_CS42_3DL_TGACv1_253481_AA0894690	8	0	2	27	28	23	1	2	2	Harbinger transposase-derived nuclease domain
TRIAE_CS42_3DL_TGACv1_253902_AA0895730	409	331	348	2071	1466	1735	638	411	551	Leucine-rich repeat-containing N-terminal, plant-type
TRIAE_CS42_3DL_TGACv1_254173_AA0896070	396	213	309	7351	2926	4796	909	536	677	IQ motif, EF-hand binding site
TRIAE_CS42_3DS_TGACv1_271450_AA0898850	7	6	4	28	21	28	10	8	4	#N/A
TRIAE_CS42_3DS_TGACv1_271471_AA0899610	2	1	2	19	13	31	12	3	4	NAD(P)-binding domain
TRIAE_CS42_3DS_TGACv1_271634_AA0904380	45	39	86	1441	188	785	75	37	65	Peptidase S8, subtilisin, His-active site
TRIAE_CS42_3DS_TGACv1_271791_AA0908080	12	13	4	116	42	67	22	4	4	Alpha/beta hydrolase fold-3
TRIAE_CS42_3DS_TGACv1_271827_AA0908930	596	114	189	3403	2125	2597	103	66	67	CALMODULIN-BINDING PROTEIN60
TRIAE_CS42_3DS_TGACv1_271843_AA0909280	342	370	369	2045	1556	1522	205	150	204	#N/A
TRIAE_CS42_3DS_TGACv1_271880_AA0910090	2	2	4	13	11	19	0	2	2	Protein of unknown function DUF674
TRIAE_CS42_3DS_TGACv1_271972_AA0912060	49	19	16	178	87	152	24	7	11	consensus disorder prediction
TRIAE_CS42_3DS_TGACv1_271994_AA0912660	35	38	29	182	116	146	65	53	37	WD40
TRIAE_CS42_3DS_TGACv1_272013_AA0913110	642	593	704	3682	2056	3095	1537	772	855	NAC domain
TRIAE_CS42_3DS_TGACv1_272064_AA0914040	93	87	115	601	334	452	139	114	74	Ankyrin repeat-containing domain
TRIAE_CS42_3DS_TGACv1_272095_AA0914580	1	0	7	209	356	285	423	58	31	#N/A
TRIAE_CS42_3DS_TGACv1_272144_AA0915540	55	46	58	293	267	334	185	122	157	#N/A
TRIAE_CS42_3DS_TGACv1_272154_AA0915800	50	8	4	1511	1532	961	37	8	17	Harbinger transposase-derived nuclease domain
TRIAE_CS42_3DS_TGACv1_272327_AA0919080	4	0	2	18	17	9	6	8	6	TRAF-like
TRIAE_CS42_3DS_TGACv1_272485_AA0921430	112	59	42	792	301	562	55	12	25	WRKY domain
TRIAE_CS42_3DS_TGACv1_272534_AA0921990	1121	1089	980	6385	4236	5859	1473	1064	734	Glutamyl/glutaminyl-tRNA synthetase, class Ib, catalytic domain
TRIAE_CS42_3DS_TGACv1_272535_AA0922000	15	19	23	117	78	80	22	14	9	consensus disorder prediction
TRIAE_CS42_3DS_TGACv1_272660_AA0923630	0	0	0	13	21	6	2	0	1	Ribonuclease H-like domain
TRIAE_CS42_3DS_TGACv1_272777_AA0925200	0	1	0	20	5	18	82	3	1	RmlC-like cupin domain
TRIAE_CS42_3DS_TGACv1_272832_AA0925670	123	92	123	591	479	458	349	220	266	#N/A
TRIAE_CS42_3DS_TGACv1_272882_AA0926090	0	0	1	3	17	21	159	13	1	Cytochrome P450
TRIAE_CS42_3DS_TGACv1_272888_AA0926140	85	60	70	497	388	284	52	72	92	consensus disorder prediction
TRIAE_CS42_3DS_TGACv1_272901_AA0926360	2	4	12	46	22	20	17	3	11	Wall-associated receptor kinase, C-terminal
TRIAE_CS42_3DS_TGACv1_272939_AA0926820	310	263	337	3717	1336	1989	476	406	556	#N/A
TRIAE_CS42_3DS_TGACv1_273142_AA0928820	19	30	24	182	160	137	61	32	36	B3 DNA binding domain
TRIAE_CS42_3DS_TGACv1_273229_AA0929650	4	2	1	114	83	69	19	7	4	consensus disorder prediction
TRIAE_CS42_3DS_TGACv1_273334_AA0930440	1625	1446	1757	21746	11443	18358	2368	1385	1203	P-loop containing nucleoside triphosphate hydrolase
TRIAE_CS42_3DS_TGACv1_273403_AA0930970	6	7	8	74	92	140	583	24	24	#N/A
TRIAE_CS42_3DS_TGACv1_273570_AA0932240	1	1	0	45	88	65	10	2	5	HSP20-like chaperone
TRIAE_CS42_3DS_TGACv1_273617_AA0932540	32	0	2	676	535	414	18	2	26	consensus disorder prediction
TRIAE_CS42_3DS_TGACv1_273657_AA0932770	2	6	2	560	422	570	80	1	2	consensus disorder prediction
TRIAE_CS42_3DS_TGACv1_273657_AA0932780	31	35	91	2763	1760	2378	796	108	90	consensus disorder prediction
TRIAE_CS42_3DS_TGACv1_273741_AA0933190	218	269	255	1584	1070	1291	560	314	298	Protein of unknown function DUF761, plant
TRIAE_CS42_3DS_TGACv1_274000_AA0934260	43	53	44	649	818	590	1078	176	102	#N/A
TRIAE_CS42_3DS_TGACv1_274119_AA0934800	1	1	0	6	8	15	2	0	1	#N/A
TRIAE_CS42_3DS_TGACv1_274373_AA0935610	24	35	17	156	155	104	29	21	27	Alpha/Beta hydrolase fold
TRIAE_CS42_3DS_TGACv1_274837_AA0936350	273	134	278	4395	3995	4330	815	427	453	Flavoprotein-like domain
TRIAE_CS42_4AL_TGACv1_288138_AA0938110	20	26	17	104	84	78	30	23	16	#N/A
TRIAE_CS42_4AL_TGACv1_288218_AA0940790	116	97	97	864	281	745	786	240	259	Glutathione S-transferase, C-terminal-like
TRIAE_CS42_4AL_TGACv1_288243_AA0941980	0	1	1	12	6	6	0	0	2	#N/A
TRIAE_CS42_4AL_TGACv1_288316_AA0944660	32	7	10	229	141	238	82	16	31	ABC-transporter extracellular N-terminal domain
TRIAE_CS42_4AL_TGACv1_288467_AA0949470	9	5	5	19	42	35	15	10	4	consensus disorder prediction
TRIAE_CS42_4AL_TGACv1_288474_AA0949660	19	44	33	317	400	235	45	34	25	#N/A
TRIAE_CS42_4AL_TGACv1_288590_AA0953160	3	6	7	156	86	132	15	0	5	Chloramphenicol acetyltransferase-like domain
TRIAE_CS42_4AL_TGACv1_288640_AA0954230	566	560	555	2929	2213	2466	865	729	733	RING/Ubox like zinc-binding domain
TRIAE_CS42_4AL_TGACv1_288726_AA0956580	298	291	242	2523	1331	1619	443	137	152	Alpha carbonic anhydrase
TRIAE_CS42_4AL_TGACv1_288769_AA0957610	5	7	4	37	22	27	10	3	3	Transcription factor GRAS
TRIAE_CS42_4AL_TGACv1_288769_AA0957630	0	5	1	27	39	24	1	1	1	consensus disorder prediction
TRIAE_CS42_4AL_TGACv1_288769_AA0957640	3	4	6	48	38	26	8	2	2	Transcription factor GRAS
TRIAE_CS42_4AL_TGACv1_288781_AA0958010	0	0	0	5	4	14	1	1	1	Late embryogenesis abundant protein, LEA-14
TRIAE_CS42_4AL_TGACv1_288792_AA0958240	261	215	254	1410	901	962	262	320	286	consensus disorder prediction
TRIAE_CS42_4AL_TGACv1_288813_AA0958750	2	1	4	30	12	12	6	4	9	Reverse transcriptase domain
TRIAE_CS42_4AL_TGACv1_288907_AA0961070	79	64	34	390	147	264	196	140	128	Zinc finger, C2H2
TRIAE_CS42_4AL_TGACv1_288965_AA0962160	0	1	0	18	25	11	2	1	2	consensus disorder prediction
TRIAE_CS42_4AL_TGACv1_289022_AA0963650	2	0	4	15	10	14	8	1	0	#N/A
TRIAE_CS42_4AL_TGACv1_289132_AA0965440	342	209	148	1710	742	1028	442	299	413	consensus disorder prediction
TRIAE_CS42_4AL_TGACv1_289132_AA0965450	3	4	1	14	11	19	3	0	0	#N/A
TRIAE_CS42_4AL_TGACv1_289139_AA0965750	4	2	4	41	11	22	6	7	4	consensus disorder prediction
TRIAE_CS42_4AL_TGACv1_289320_AA0969080	1071	675	839	6703	1901	3923	731	238	410	#N/A
TRIAE_CS42_4AL_TGACv1_289359_AA0969670	11	3	6	735	826	895	10	6	7	R3H-associated N-terminal domain
TRIAE_CS42_4AL_TGACv1_289365_AA0969800	29	24	51	202	121	157	59	41	67	Cytochrome P450
TRIAE_CS42_4AL_TGACv1_289418_AA0970710	16	27	10	247	123	163	125	28	60	Multi antimicrobial extrusion protein
TRIAE_CS42_4AL_TGACv1_289471_AA0971690	1	2	1	35	38	38	411	7	4	GST_C_Tau
TRIAE_CS42_4AL_TGACv1_289592_AA0973550	429	259	246	2873	1939	1689	242	203	285	consensus disorder prediction
TRIAE_CS42_4AL_TGACv1_289608_AA0974000	398	402	366	2942	1443	2425	464	412	464	consensus disorder prediction
TRIAE_CS42_4AL_TGACv1_289670_AA0974890	1	1	1	15	5	7	5	1	0	consensus disorder prediction
TRIAE_CS42_4AL_TGACv1_289688_AA0975310	126	125	98	3188	938	2103	218	141	171	Vacuolar protein sorting-associated protein Ist1
TRIAE_CS42_4AL_TGACv1_289771_AA0976680	12	8	13	56	43	43	94	38	21	#N/A
TRIAE_CS42_4AL_TGACv1_289787_AA0976860	213	193	238	1181	749	1110	347	383	402	#N/A
TRIAE_CS42_4AL_TGACv1_289868_AA0978150	347	284	263	3680	2436	2419	783	433	410	Alpha/Beta hydrolase fold
TRIAE_CS42_4AL_TGACv1_289945_AA0979260	5	13	8	102	96	70	88	19	6	consensus disorder prediction
TRIAE_CS42_4AL_TGACv1_290001_AA0980170	1	3	1	69	99	61	33	4	9	Pre-mRNA processing factor 4 (PRP4)-like
TRIAE_CS42_4AL_TGACv1_290153_AA0982330	1	0	3	18	12	7	3	0	2	consensus disorder prediction
TRIAE_CS42_4AL_TGACv1_290177_AA0982610	31	16	35	3240	1444	2155	49	18	36	#N/A
TRIAE_CS42_4AL_TGACv1_290177_AA0982620	7	4	5	1232	644	926	40	1	7	consensus disorder prediction
TRIAE_CS42_4AL_TGACv1_290322_AA0984090	88	40	67	4196	3334	3472	121	74	59	#N/A
TRIAE_CS42_4AL_TGACv1_290391_AA0984880	383	265	274	3038	1411	2682	1906	529	719	#N/A
TRIAE_CS42_4AL_TGACv1_290434_AA0985440	67	64	57	1175	693	699	178	44	23	OB-fold nucleic acid binding domain, AA-tRNA synthetase-type
TRIAE_CS42_4AL_TGACv1_290488_AA0985950	2	2	0	14	11	10	11	3	5	#N/A
TRIAE_CS42_4AL_TGACv1_290690_AA0988220	26	23	38	275	202	229	46	46	48	Domain unknown function DUF295
TRIAE_CS42_4AL_TGACv1_290740_AA0988810	86	95	79	1215	547	736	79	71	65	Domain of unknown function DUF569
TRIAE_CS42_4AL_TGACv1_290743_AA0988850	34	29	25	621	578	498	17	14	7	Lateral organ boundaries, LOB
TRIAE_CS42_4AL_TGACv1_290785_AA0989360	0	3	0	17	23	19	2	0	2	AP2/ERF domain
TRIAE_CS42_4AL_TGACv1_290820_AA0989680	85	91	88	1717	1031	900	102	77	86	Inosine triphosphate pyrophosphatase-like
TRIAE_CS42_4AL_TGACv1_290820_AA0989690	3	13	1	35	22	17	3	1	4	Maf-like protein
TRIAE_CS42_4AL_TGACv1_290832_AA0989860	6	7	11	76	35	42	7	4	10	#N/A
TRIAE_CS42_4AL_TGACv1_290985_AA0991160	10	9	13	162	214	116	83	13	21	Pirin
TRIAE_CS42_4AL_TGACv1_291002_AA0991310	2	1	0	1145	936	1081	134	3	3	Eukaryotic translation initiation factor 3 subunit G, N-terminal
TRIAE_CS42_4AL_TGACv1_291054_AA0991830	0	0	1	5	5	9	32	1	0	#N/A
TRIAE_CS42_4AL_TGACv1_291146_AA0992480	40	38	15	213	101	181	75	12	38	Purine nucleobase transmembrane transport
TRIAE_CS42_4AL_TGACv1_291265_AA0993290	22	2	12	178	93	118	21	6	5	consensus disorder prediction
TRIAE_CS42_4AL_TGACv1_291355_AA0994150	80	63	73	801	536	893	382	142	206	RmlC-like jelly roll fold
TRIAE_CS42_4AL_TGACv1_291355_AA0994170	123	95	99	907	638	859	335	161	156	Cupin 1
TRIAE_CS42_4AL_TGACv1_291824_AA0996740	1	1	5	44	30	36	9	1	3	DNA-binding domain
TRIAE_CS42_4AL_TGACv1_292230_AA0998160	2137	1991	2515	16884	11260	11302	4713	4396	4495	NAC domain
TRIAE_CS42_4AL_TGACv1_292235_AA0998210	26	21	31	194	106	110	4	30	14	Caspase-like domain
TRIAE_CS42_4AL_TGACv1_292371_AA0998660	22	8	10	67	47	61	49	14	19	consensus disorder prediction
TRIAE_CS42_4AL_TGACv1_294735_AA1001600	36	33	36	272	119	164	128	63	84	GNAT domain
TRIAE_CS42_4AL_TGACv1_294735_AA1001610	80	98	74	520	338	283	188	115	126	GNAT domain
TRIAE_CS42_4AL_TGACv1_302529_AA1003350	0	1	1	9	14	13	5	4	2	#N/A
TRIAE_CS42_4AS_TGACv1_306296_AA1005970	82	60	140	518	390	379	37	16	35	Myb domain
TRIAE_CS42_4AS_TGACv1_306345_AA1006720	11	11	10	105	87	78	17	8	4	#N/A
TRIAE_CS42_4AS_TGACv1_306371_AA1007170	64	58	56	353	180	263	71	22	53	Oxoglutarate/iron-dependent dioxygenase
TRIAE_CS42_4AS_TGACv1_306400_AA1007600	3	0	1	54	26	25	1	2	0	PGG domain
TRIAE_CS42_4AS_TGACv1_306420_AA1007870	595	532	626	3298	2629	2878	980	940	982	#N/A
TRIAE_CS42_4AS_TGACv1_306424_AA1007960	213	257	170	1868	1567	1600	227	177	174	NTF2-like domain
TRIAE_CS42_4AS_TGACv1_306486_AA1008960	800	647	706	5700	2866	4134	1108	520	647	Protein kinase domain
TRIAE_CS42_4AS_TGACv1_306492_AA1009080	37	39	43	279	194	212	116	41	57	Winged helix-turn-helix DNA-binding domain
TRIAE_CS42_4AS_TGACv1_306607_AA1010970	291	189	234	3790	2170	2974	671	335	495	EF-hand domain
TRIAE_CS42_4AS_TGACv1_306645_AA1011420	1	3	5	17	15	18	4	3	2	consensus disorder prediction
TRIAE_CS42_4AS_TGACv1_306699_AA1012200	413	463	717	9285	4606	6560	4852	1307	1633	#N/A
TRIAE_CS42_4AS_TGACv1_306760_AA1012920	492	205	707	5252	6332	6035	6899	1703	1516	Glutathione S-transferase, N-terminal
TRIAE_CS42_4AS_TGACv1_306761_AA1013140	3	6	2	77	49	34	20	3	5	P-type ATPase, transmembrane domain
TRIAE_CS42_4AS_TGACv1_306789_AA1013420	12	11	9	50	39	49	35	28	24	consensus disorder prediction
TRIAE_CS42_4AS_TGACv1_306881_AA1014450	493	438	406	4706	2486	3553	770	696	568	HAD-like domain
TRIAE_CS42_4AS_TGACv1_306883_AA1014550	32	22	19	505	563	540	75	12	22	AP2/ERF domain
TRIAE_CS42_4AS_TGACv1_306962_AA1015530	11	1	3	223	50	134	17	5	9	Haem peroxidase, plant/fungal/bacterial
TRIAE_CS42_4AS_TGACv1_307058_AA1016590	385	274	352	3161	1398	2147	341	140	203	Cupredoxin
TRIAE_CS42_4AS_TGACv1_307094_AA1016910	0	0	0	11	14	8	0	0	2	HSP20-like chaperone
TRIAE_CS42_4AS_TGACv1_307158_AA1017770	163	147	179	2619	1852	1938	597	265	314	Alpha crystallin/Hsp20 domain
TRIAE_CS42_4AS_TGACv1_307167_AA1017950	31	31	38	330	210	229	81	46	30	ABC transporter type 1, transmembrane domain
TRIAE_CS42_4AS_TGACv1_307193_AA1018260	10	12	1	91	38	49	9	6	5	#N/A
TRIAE_CS42_4AS_TGACv1_307200_AA1018380	16	3	6	55	27	36	8	6	9	#N/A
TRIAE_CS42_4AS_TGACv1_307239_AA1018700	31	32	24	285	201	261	103	49	26	#N/A
TRIAE_CS42_4AS_TGACv1_307322_AA1019440	0	0	0	38	44	26	1	1	0	#N/A
TRIAE_CS42_4AS_TGACv1_307328_AA1019520	469	70	105	4599	2726	3481	137	103	216	PPM-type phosphatase domain
TRIAE_CS42_4AS_TGACv1_307370_AA1019900	108	26	24	297	268	248	22	18	58	Protein of unknown function DUF761, plant
TRIAE_CS42_4AS_TGACv1_307448_AA1020490	43	42	42	233	151	208	100	175	142	WD40 repeat
TRIAE_CS42_4AS_TGACv1_307507_AA1020940	381	277	292	3414	3161	2837	869	720	741	zinc-ribbon
TRIAE_CS42_4AS_TGACv1_307555_AA1021350	340	242	411	3268	1711	2642	887	857	1064	Phosphoenolpyruvate carboxykinase, ATP-utilising
TRIAE_CS42_4AS_TGACv1_307633_AA1022190	0	1	1	21	5	17	2	0	0	Cytochrome P450
TRIAE_CS42_4AS_TGACv1_307667_AA1022530	0	0	0	93	154	98	2	0	3	Alpha crystallin/Hsp20 domain
TRIAE_CS42_4AS_TGACv1_307767_AA1023400	101	45	58	2287	1439	1895	241	125	249	Short-chain dehydrogenase/reductase SDR
TRIAE_CS42_4AS_TGACv1_307817_AA1023680	523	644	384	3778	2556	2443	477	648	589	#N/A
TRIAE_CS42_4AS_TGACv1_307865_AA1024140	164	142	160	1241	784	1009	231	148	131	Anthranilate synthase component I, PabB-like
TRIAE_CS42_4AS_TGACv1_307923_AA1024430	0	1	3	16	21	18	0	1	0	consensus disorder prediction
TRIAE_CS42_4AS_TGACv1_308000_AA1025150	1397	901	1285	9924	4810	6865	4214	2841	3499	Cupredoxin
TRIAE_CS42_4AS_TGACv1_308068_AA1025640	6	3	4	42	22	17	21	6	10	#N/A
TRIAE_CS42_4AS_TGACv1_308110_AA1025950	150	159	171	1326	210	903	463	220	302	Pat17_isozyme_like
TRIAE_CS42_4AS_TGACv1_308185_AA1026510	98	123	110	791	394	634	180	213	258	#N/A
TRIAE_CS42_4AS_TGACv1_308455_AA1027980	1	2	1	27	17	15	11	2	3	#N/A
TRIAE_CS42_4AS_TGACv1_308463_AA1028010	1653	1312	1316	28486	19852	18398	4095	3330	4138	DOMON domain
TRIAE_CS42_4AS_TGACv1_308477_AA1028140	28	40	27	209	208	188	13	6	54	Protein kinase, ATP binding site
TRIAE_CS42_4AS_TGACv1_308520_AA1028400	117	105	144	1431	1043	1178	258	132	188	HSP20-like chaperone
TRIAE_CS42_4AS_TGACv1_308614_AA1028690	228	150	339	6019	3725	5367	377	306	384	consensus disorder prediction
TRIAE_CS42_4AS_TGACv1_308618_AA1028700	1	0	0	35	76	52	0	0	1	consensus disorder prediction
TRIAE_CS42_4AS_TGACv1_308795_AA1029550	184	76	120	1193	519	994	373	126	215	Protein of unknown function DUF1262
TRIAE_CS42_4AS_TGACv1_308911_AA1029920	427	346	529	5334	4643	4669	1770	956	1388	Heavy metal-associated domain, HMA
TRIAE_CS42_4AS_TGACv1_309013_AA1030140	44	47	52	525	137	275	52	47	34	consensus disorder prediction
TRIAE_CS42_4AS_TGACv1_309895_AA1031260	0	0	0	14	4	4	1	0	0	RlpA-like protein, double-psi beta-barrel domain
TRIAE_CS42_4AS_TGACv1_309895_AA1031270	39	49	29	288	207	268	81	16	26	FAD-binding domain
TRIAE_CS42_4AS_TGACv1_309924_AA1031300	587	365	618	3113	2345	2972	1359	948	673	Glutathione S-transferase, C-terminal
TRIAE_CS42_4BL_TGACv1_320262_AA1032990	200	254	201	2207	1507	1367	175	170	137	Tetratricopeptide-like helical domain
TRIAE_CS42_4BL_TGACv1_320270_AA1033300	787	614	689	5948	3447	4531	1134	501	635	Serine/threonine-protein kinase, active site
TRIAE_CS42_4BL_TGACv1_320279_AA1033690	7	6	1	47	45	35	13	4	5	F-box domain
TRIAE_CS42_4BL_TGACv1_320309_AA1034660	173	83	160	3381	4087	3289	1696	319	244	Glutathione S-transferase, N-terminal
TRIAE_CS42_4BL_TGACv1_320310_AA1034750	211	257	462	2884	2049	2140	686	1027	1087	#N/A
TRIAE_CS42_4BL_TGACv1_320317_AA1035010	1	0	0	33	31	21	6	1	3	Alpha crystallin/Hsp20 domain
TRIAE_CS42_4BL_TGACv1_320317_AA1035040	2	1	0	12	4	13	6	4	1	consensus disorder prediction
TRIAE_CS42_4BL_TGACv1_320340_AA1035950	2	0	0	6	11	6	2	3	4	Leucine-rich repeat domain, L domain-like
TRIAE_CS42_4BL_TGACv1_320400_AA1037840	2	0	1	7	10	11	8	11	0	CCT domain
TRIAE_CS42_4BL_TGACv1_320407_AA1038140	219	103	181	1033	805	737	121	168	165	Isopenicillin N synthase-like
TRIAE_CS42_4BL_TGACv1_320407_AA1038150	61	28	49	257	133	238	34	70	50	Isopenicillin N synthase-like
TRIAE_CS42_4BL_TGACv1_320414_AA1038330	12	23	35	92	151	106	28	61	49	consensus disorder prediction
TRIAE_CS42_4BL_TGACv1_320475_AA1040750	5	1	8	42	52	34	13	13	26	Zf-FLZ domain
TRIAE_CS42_4BL_TGACv1_320496_AA1041540	698	597	601	5216	3526	4055	2084	954	1142	Phytocyanin
TRIAE_CS42_4BL_TGACv1_320502_AA1041730	64	57	54	762	748	682	200	98	92	consensus disorder prediction
TRIAE_CS42_4BL_TGACv1_320520_AA1042120	213	148	200	3274	1959	2657	447	265	374	EF-hand domain
TRIAE_CS42_4BL_TGACv1_320543_AA1042700	8	4	2	37	13	19	5	5	2	PGG domain
TRIAE_CS42_4BL_TGACv1_320553_AA1043050	3	4	3	25	9	20	24	0	2	Protein kinase-like domain
TRIAE_CS42_4BL_TGACv1_320566_AA1043510	3	2	2	37	13	19	7	3	4	consensus disorder prediction
TRIAE_CS42_4BL_TGACv1_320568_AA1043520	222	170	180	2606	1464	1938	743	202	257	Phytocyanin domain
TRIAE_CS42_4BL_TGACv1_320580_AA1043710	13	7	4	228	124	157	31	15	27	Tify domain
TRIAE_CS42_4BL_TGACv1_320599_AA1044250	94	132	76	2374	2708	2835	156	69	41	FAD-binding domain
TRIAE_CS42_4BL_TGACv1_320617_AA1044750	22	36	25	370	274	380	132	61	64	Multi antimicrobial extrusion protein
TRIAE_CS42_4BL_TGACv1_320643_AA1045450	17	14	4	92	40	58	59	35	22	consensus disorder prediction
TRIAE_CS42_4BL_TGACv1_320661_AA1045860	2	2	1	11	12	16	14	4	1	NAC domain
TRIAE_CS42_4BL_TGACv1_320661_AA1045870	9	3	4	32	26	19	6	9	3	NAC domain
TRIAE_CS42_4BL_TGACv1_320718_AA1046980	396	391	386	3122	2497	2690	950	826	880	Zinc finger, RING/FYVE/PHD-type
TRIAE_CS42_4BL_TGACv1_320747_AA1047740	192	207	164	1679	842	1330	197	141	140	consensus disorder prediction
TRIAE_CS42_4BL_TGACv1_320748_AA1047760	1621	1356	1196	16206	11355	11459	3393	3719	4321	DOMON domain
TRIAE_CS42_4BL_TGACv1_320755_AA1047930	36	35	54	252	161	188	144	95	56	ABC transporter, conserved site
TRIAE_CS42_4BL_TGACv1_320779_AA1048540	1	2	1	25	15	12	7	2	3	consensus disorder prediction
TRIAE_CS42_4BL_TGACv1_320800_AA1049060	169	172	208	1083	883	787	342	280	316	#N/A
TRIAE_CS42_4BL_TGACv1_320814_AA1049320	72	71	94	850	583	655	137	60	102	Isopenicillin N synthase-like
TRIAE_CS42_4BL_TGACv1_320815_AA1049370	22	12	9	125	56	79	11	10	14	Gnk2-homologous domain
TRIAE_CS42_4BL_TGACv1_320974_AA1052850	2195	2910	4791	23805	17146	24306	11380	6481	6043	Globin-like
TRIAE_CS42_4BL_TGACv1_321002_AA1053370	5	8	7	42	74	55	27	13	11	consensus disorder prediction
TRIAE_CS42_4BL_TGACv1_321080_AA1054950	54	59	67	294	174	362	250	130	221	DnaJ domain
TRIAE_CS42_4BL_TGACv1_321140_AA1056120	792	882	940	5097	3892	3690	1790	2181	2047	HSP20-like chaperone
TRIAE_CS42_4BL_TGACv1_321194_AA1057030	16	8	11	88	44	53	13	11	10	#N/A
TRIAE_CS42_4BL_TGACv1_321267_AA1058170	103	109	91	603	350	490	165	157	103	PLAT/LH2 domain
TRIAE_CS42_4BL_TGACv1_321284_AA1058330	20	17	4	175	123	120	26	12	22	Myb domain
TRIAE_CS42_4BL_TGACv1_321289_AA1058450	1	1	2	33	30	24	40	1	35	#N/A
TRIAE_CS42_4BL_TGACv1_321304_AA1058740	0	0	2	13	6	4	4	3	4	Mlo-related protein
TRIAE_CS42_4BL_TGACv1_321420_AA1060210	1	0	1	17	18	13	3	5	9	Prokaryotic membrane lipoprotein lipid attachment site profile.
TRIAE_CS42_4BL_TGACv1_321503_AA1061470	1258	1285	1423	13005	7058	10810	4834	2548	3181	NADPH oxidase subgroup (NOX)
TRIAE_CS42_4BL_TGACv1_321553_AA1062220	0	0	1	14	6	5	0	2	0	Reverse transcriptase domain
TRIAE_CS42_4BL_TGACv1_321575_AA1062420	28	30	17	153	93	88	31	20	13	Heat shock factor (HSF)-type, DNA-binding
TRIAE_CS42_4BL_TGACv1_321636_AA1063430	3	2	0	26	13	9	4	0	1	Cation-transporting P-type ATPase, N-terminal
TRIAE_CS42_4BL_TGACv1_321677_AA1063990	5	5	3	18	23	19	3	2	3	Leucine-rich repeat domain, L domain-like
TRIAE_CS42_4BL_TGACv1_321683_AA1064050	313	301	308	2734	829	2030	760	328	450	Protein of unknown function DUF1262
TRIAE_CS42_4BL_TGACv1_321836_AA1066040	23	33	14	171	105	121	27	31	50	Lambda repressor-like, DNA-binding domain
TRIAE_CS42_4BL_TGACv1_321968_AA1067310	0	1	0	15	21	17	2	2	0	Cyclin, C-terminal domain
TRIAE_CS42_4BL_TGACv1_322251_AA1070040	0	3	0	9	12	9	9	1	0	consensus disorder prediction
TRIAE_CS42_4BL_TGACv1_322260_AA1070160	6	0	5	159	185	171	5	3	8	CO dehydrogenase flavoprotein-like, FAD-binding, subdomain 2
TRIAE_CS42_4BL_TGACv1_322296_AA1070410	367	97	109	3498	1963	2726	145	100	190	PPM-type phosphatase domain
TRIAE_CS42_4BL_TGACv1_322546_AA1071930	104	11	19	281	186	181	13	15	42	consensus disorder prediction
TRIAE_CS42_4BL_TGACv1_322707_AA1072720	1	4	6	23	11	18	122	5	0	#N/A
TRIAE_CS42_4BL_TGACv1_322715_AA1072790	33	2	6	98	140	97	13	14	5	NAC domain
TRIAE_CS42_4BL_TGACv1_322716_AA1072800	388	323	371	2253	1561	1776	383	383	259	Calcium-transporting P-type ATPase, N-terminal autoinhibitory domain
TRIAE_CS42_4BL_TGACv1_322968_AA1073540	257	106	214	1263	1052	1317	221	92	79	Aromatic-ring hydroxylase (flavoprotein monooxygenase) signature
TRIAE_CS42_4BS_TGACv1_327843_AA1075940	2	3	0	1330	1048	1209	36	5	3	R3H domain
TRIAE_CS42_4BS_TGACv1_327852_AA1076300	183	153	148	8506	6248	4702	741	104	93	Aminoacyl-tRNA synthetase, class II (D/K/N)
TRIAE_CS42_4BS_TGACv1_327883_AA1077670	0	1	0	11	8	7	3	4	7	consensus disorder prediction
TRIAE_CS42_4BS_TGACv1_327919_AA1078720	193	263	135	1644	1027	1217	347	444	339	Amino acid transporter, transmembrane domain
TRIAE_CS42_4BS_TGACv1_327925_AA1078970	1618	1472	1746	9920	6750	7108	2415	1878	2208	NAC domain
TRIAE_CS42_4BS_TGACv1_327925_AA1078980	0	2	1	137	154	90	9	3	0	Peptidase family A1 domain
TRIAE_CS42_4BS_TGACv1_327925_AA1078990	72	60	52	1465	852	906	96	65	60	Aspartic peptidase, active site
TRIAE_CS42_4BS_TGACv1_328069_AA1082240	405	418	458	2424	1819	2300	561	467	588	F-box domain
TRIAE_CS42_4BS_TGACv1_328152_AA1083590	149	241	236	3995	2540	2464	203	151	180	Inosine triphosphate pyrophosphatase-like
TRIAE_CS42_4BS_TGACv1_328195_AA1084410	5	13	18	186	224	366	236	29	29	Cupin 1
TRIAE_CS42_4BS_TGACv1_328209_AA1084680	0	0	0	58	33	42	0	0	1	consensus disorder prediction
TRIAE_CS42_4BS_TGACv1_328448_AA1087930	374	168	190	2773	2064	1918	305	267	396	#N/A
TRIAE_CS42_4BS_TGACv1_328507_AA1089110	23	28	9	614	596	537	7	6	7	consensus disorder prediction
TRIAE_CS42_4BS_TGACv1_328589_AA1090600	2	2	1	20	16	8	8	1	4	Capsid/spike protein, ssDNA virus
TRIAE_CS42_4BS_TGACv1_328613_AA1091020	88	62	58	479	382	426	80	83	64	NAC domain
TRIAE_CS42_4BS_TGACv1_328726_AA1092690	1	0	0	47	31	33	9	0	0	consensus disorder prediction
TRIAE_CS42_4BS_TGACv1_328726_AA1092700	96	80	160	1398	1068	1020	293	235	401	consensus disorder prediction
TRIAE_CS42_4BS_TGACv1_328762_AA1093290	0	0	0	0	21	21	0	1	0	S-adenosyl-L-methionine-dependent methyltransferase
TRIAE_CS42_4BS_TGACv1_328956_AA1096160	16	10	18	195	158	177	7	13	3	HPP
TRIAE_CS42_4BS_TGACv1_329063_AA1097530	3	4	2	957	836	874	165	2	2	Nucleotide-binding alpha-beta plait domain
TRIAE_CS42_4BS_TGACv1_329082_AA1097730	0	1	1	8	8	7	1	1	2	Reverse transcriptase domain
TRIAE_CS42_4BS_TGACv1_329228_AA1099130	7	10	4	42	24	31	22	20	22	#N/A
TRIAE_CS42_4BS_TGACv1_329268_AA1099450	13	5	6	210	293	216	11	6	6	consensus disorder prediction
TRIAE_CS42_4BS_TGACv1_329334_AA1100250	5	9	8	37	27	32	15	13	9	consensus disorder prediction
TRIAE_CS42_4BS_TGACv1_329455_AA1101520	1	0	3	17	11	13	57	0	4	#N/A
TRIAE_CS42_4BS_TGACv1_329487_AA1101840	17	17	9	235	164	96	62	22	52	#N/A
TRIAE_CS42_4BS_TGACv1_329601_AA1102650	27	28	11	160	108	131	13	13	11	Leucine-rich repeat domain, L domain-like
TRIAE_CS42_4BS_TGACv1_329875_AA1104470	114	133	156	4925	1761	3525	294	172	316	consensus disorder prediction
TRIAE_CS42_4BS_TGACv1_329973_AA1105190	268	239	199	1776	1049	1096	495	298	300	Fungal lipase-like domain
TRIAE_CS42_4BS_TGACv1_330426_AA1107610	27	9	12	215	153	157	11	2	12	consensus disorder prediction
TRIAE_CS42_4BS_TGACv1_330426_AA1107620	42	23	41	184	145	186	25	10	17	consensus disorder prediction
TRIAE_CS42_4BS_TGACv1_330737_AA1108690	5	2	10	85	86	80	169	28	46	#N/A
TRIAE_CS42_4BS_TGACv1_331300_AA1109830	3	3	10	175	77	125	90	4	7	#N/A
TRIAE_CS42_4DL_TGACv1_342396_AA1112390	68	73	81	940	457	649	178	62	145	Oxoglutarate/iron-dependent dioxygenase
TRIAE_CS42_4DL_TGACv1_342407_AA1112810	0	0	0	61	61	45	2	1	0	#N/A
TRIAE_CS42_4DL_TGACv1_342407_AA1112820	51	41	35	1554	1138	1536	83	68	66	tRNA synthetases class I, catalytic domain
TRIAE_CS42_4DL_TGACv1_342448_AA1114000	426	280	350	3683	2785	2942	861	677	989	Heavy metal-associated domain, HMA
TRIAE_CS42_4DL_TGACv1_342478_AA1114680	124	141	111	654	473	580	237	152	170	HSP20-like chaperone
TRIAE_CS42_4DL_TGACv1_342488_AA1114970	109	150	88	835	538	602	99	90	75	STAS domain
TRIAE_CS42_4DL_TGACv1_342610_AA1117970	1	2	1	13	7	15	1	2	4	Reverse transcriptase domain
TRIAE_CS42_4DL_TGACv1_342660_AA1119340	86	61	95	3478	3093	3601	159	53	34	FAD/NAD(P)-binding domain
TRIAE_CS42_4DL_TGACv1_342721_AA1120330	305	316	274	1779	1057	1378	753	772	1300	Thaumatin
TRIAE_CS42_4DL_TGACv1_342747_AA1120870	1450	1294	1080	16990	13332	12054	3404	3031	3821	DOMON_CIL1_like
TRIAE_CS42_4DL_TGACv1_342786_AA1122050	41	31	37	435	157	249	79	27	39	Protein kinase domain
TRIAE_CS42_4DL_TGACv1_342830_AA1123160	3	4	6	49	25	35	13	8	4	Pre-SET domain
TRIAE_CS42_4DL_TGACv1_342840_AA1123390	0	1	5	39	15	30	10	6	12	Secretory peroxidase
TRIAE_CS42_4DL_TGACv1_342852_AA1123730	2775	2740	3338	21941	15489	14725	2622	3624	3490	Peptidase S54, rhomboid domain
TRIAE_CS42_4DL_TGACv1_342870_AA1124330	15	9	16	62	45	70	18	17	8	RNA polymerase sigma-70 region 4
TRIAE_CS42_4DL_TGACv1_342892_AA1124800	8	6	6	62	41	52	15	21	15	consensus disorder prediction
TRIAE_CS42_4DL_TGACv1_342934_AA1125640	2	0	2	131	192	142	16	0	10	HSP20-like chaperone
TRIAE_CS42_4DL_TGACv1_342936_AA1125660	3200	3614	6836	31170	19999	29354	18772	10987	11419	#N/A
TRIAE_CS42_4DL_TGACv1_342956_AA1126070	1	2	0	17	19	16	6	5	6	Nucleotide-diphospho-sugar transferases
TRIAE_CS42_4DL_TGACv1_342978_AA1126740	10	5	5	125	85	87	3	0	3	SGNH hydrolase-type esterase domain
TRIAE_CS42_4DL_TGACv1_342992_AA1127230	580	579	473	4152	3370	3277	699	552	486	Alpha-ketoglutarate-dependent dioxygenase AlkB-like
TRIAE_CS42_4DL_TGACv1_343029_AA1127810	1385	1471	1540	23622	14249	18071	5564	3329	3455	FAD-binding 8
TRIAE_CS42_4DL_TGACv1_343034_AA1127970	133	95	141	3624	2896	3045	556	221	239	consensus disorder prediction
TRIAE_CS42_4DL_TGACv1_343034_AA1127990	46	70	73	2285	1860	1906	610	128	120	FAD-binding domain
TRIAE_CS42_4DL_TGACv1_343079_AA1129090	50	12	14	308	98	237	132	41	90	consensus disorder prediction
TRIAE_CS42_4DL_TGACv1_343079_AA1129100	80	34	25	384	141	245	107	59	123	consensus disorder prediction
TRIAE_CS42_4DL_TGACv1_343079_AA1129120	69	38	27	356	119	250	169	63	150	consensus disorder prediction
TRIAE_CS42_4DL_TGACv1_343233_AA1131910	212	242	212	1243	799	1006	416	324	241	Lipoxygenase, C-terminal
TRIAE_CS42_4DL_TGACv1_343241_AA1132000	6	3	3	51	18	32	5	2	3	Cytochrome P450, E-class, group I
TRIAE_CS42_4DL_TGACv1_343300_AA1132910	448	450	385	3820	2700	2710	1860	713	970	Phytocyanin domain
TRIAE_CS42_4DL_TGACv1_343368_AA1133680	67	50	53	1600	933	1087	203	53	86	Phytocyanin domain
TRIAE_CS42_4DL_TGACv1_343378_AA1133810	12	5	2	66	41	46	7	7	15	AMP-dependent synthetase/ligase
TRIAE_CS42_4DL_TGACv1_343409_AA1134090	357	381	346	5067	2908	3800	337	117	198	Delta12-FADS-like
TRIAE_CS42_4DL_TGACv1_343434_AA1134330	32	21	47	133	158	161	56	55	38	Acid phosphatase, plant
TRIAE_CS42_4DL_TGACv1_343503_AA1135520	154	121	145	1531	1102	1237	305	429	389	Alpha crystallin/Hsp20 domain
TRIAE_CS42_4DL_TGACv1_343543_AA1136320	154	92	300	1991	3032	2170	4626	791	596	Thioredoxin-like fold
TRIAE_CS42_4DL_TGACv1_343567_AA1136680	216	151	361	3096	1699	3235	149	112	208	#N/A
TRIAE_CS42_4DL_TGACv1_343593_AA1137090	8	1	5	53	70	36	7	12	5	NAC domain
TRIAE_CS42_4DL_TGACv1_343724_AA1138630	0	0	1	10	4	10	1	3	0	CCT domain
TRIAE_CS42_4DL_TGACv1_343752_AA1139190	0	0	0	6	6	3	5	4	1	Bromodomain
TRIAE_CS42_4DL_TGACv1_343876_AA1140880	103	164	74	907	416	678	382	68	55	consensus disorder prediction
TRIAE_CS42_4DL_TGACv1_343876_AA1140900	39	24	23	192	96	163	137	35	59	Purine nucleobase transmembrane transport
TRIAE_CS42_4DL_TGACv1_343907_AA1141370	533	369	440	2072	1685	1964	823	770	675	Glutathione S-transferase, C-terminal-like
TRIAE_CS42_4DL_TGACv1_344014_AA1142510	83	79	88	459	288	352	148	73	89	Heat shock factor (HSF)-type, DNA-binding
TRIAE_CS42_4DL_TGACv1_344018_AA1142590	19	10	25	131	128	162	49	46	104	Zf-FLZ domain
TRIAE_CS42_4DL_TGACv1_344052_AA1142970	228	307	214	2724	1855	1831	904	647	654	Alpha crystallin/Hsp20 domain
TRIAE_CS42_4DL_TGACv1_344082_AA1143440	189	211	163	2734	1108	1550	653	467	419	Multi antimicrobial extrusion protein
TRIAE_CS42_4DL_TGACv1_344093_AA1143600	52	40	47	263	262	242	40	16	17	#N/A
TRIAE_CS42_4DL_TGACv1_344108_AA1143780	109	12	27	546	492	407	46	38	116	Protein of unknown function DUF761, plant
TRIAE_CS42_4DL_TGACv1_344110_AA1143820	43	50	53	424	264	413	489	90	59	ABC transporter type 1, transmembrane domain
TRIAE_CS42_4DL_TGACv1_344270_AA1145700	3	1	0	9	11	16	2	1	1	#N/A
TRIAE_CS42_4DL_TGACv1_344545_AA1147820	3	0	3	7	13	13	3	0	3	consensus disorder prediction
TRIAE_CS42_4DL_TGACv1_344649_AA1148710	158	182	139	1325	846	962	213	206	236	consensus disorder prediction
TRIAE_CS42_4DL_TGACv1_344691_AA1148960	513	468	437	3153	1890	2601	1163	558	633	Serine/threonine-protein kinase, active site
TRIAE_CS42_4DL_TGACv1_344702_AA1149090	298	344	415	1885	1385	1461	272	182	179	#N/A
TRIAE_CS42_4DL_TGACv1_344760_AA1149570	403	444	433	2389	2064	2002	871	777	913	#N/A
TRIAE_CS42_4DL_TGACv1_344775_AA1149730	2	0	1	12	20	7	4	5	3	SANT/Myb domain
TRIAE_CS42_4DL_TGACv1_344776_AA1149750	414	237	198	2976	1200	1791	1011	877	995	consensus disorder prediction
TRIAE_CS42_4DL_TGACv1_344839_AA1150090	351	69	93	4914	2920	3666	175	108	226	PPM-type phosphatase domain
TRIAE_CS42_4DL_TGACv1_344908_AA1150460	19	2	5	164	78	63	4	7	3	#N/A
TRIAE_CS42_4DL_TGACv1_345058_AA1151320	29	33	63	285	67	225	195	28	44	Cupin 1
TRIAE_CS42_4DL_TGACv1_345093_AA1151630	2	10	9	85	71	175	13	10	6	Transferase
TRIAE_CS42_4DL_TGACv1_345171_AA1151990	10	1	33	63	63	72	25	28	21	Caspase-like domain
TRIAE_CS42_4DL_TGACv1_345526_AA1153490	65	62	55	348	333	320	33	29	30	Myb domain
TRIAE_CS42_4DL_TGACv1_345553_AA1153680	245	349	250	1516	1039	1031	277	465	375	#N/A
TRIAE_CS42_4DL_TGACv1_345573_AA1153850	23	16	24	181	114	92	23	26	11	Cyclin, N-terminal
TRIAE_CS42_4DL_TGACv1_345586_AA1153860	0	0	1	18	16	7	4	2	1	Protein of unknown function DUF241, plant
TRIAE_CS42_4DL_TGACv1_345634_AA1154040	2	2	1	15	26	12	5	3	4	#N/A
TRIAE_CS42_4DL_TGACv1_345847_AA1154590	10	18	9	51	63	58	0	4	18	consensus disorder prediction
TRIAE_CS42_4DL_TGACv1_356130_AA1157420	44	58	70	579	99	406	397	89	100	RmlC-like jelly roll fold
TRIAE_CS42_4DL_TGACv1_359486_AA1157640	51	77	114	892	282	551	539	118	140	#N/A
TRIAE_CS42_4DS_TGACv1_361061_AA1159970	7	7	5	2005	1189	1649	37	5	8	consensus disorder prediction
TRIAE_CS42_4DS_TGACv1_361061_AA1159990	24	32	46	1136	556	632	55	36	85	consensus disorder prediction
TRIAE_CS42_4DS_TGACv1_361069_AA1160320	11	8	25	217	127	134	44	52	112	Aminotransferase, class I/classII
TRIAE_CS42_4DS_TGACv1_361237_AA1164140	43	19	18	153	99	160	29	24	27	consensus disorder prediction
TRIAE_CS42_4DS_TGACv1_361414_AA1167510	1	1	0	23	27	41	6	6	3	RmlC-like jelly roll fold
TRIAE_CS42_4DS_TGACv1_361432_AA1167910	45	40	26	1030	944	835	45	33	24	consensus disorder prediction
TRIAE_CS42_4DS_TGACv1_361473_AA1168630	176	215	211	1391	390	1156	383	293	409	consensus disorder prediction
TRIAE_CS42_4DS_TGACv1_361658_AA1171140	25	16	25	369	258	281	17	28	20	Zinc finger, LSD1-type
TRIAE_CS42_4DS_TGACv1_361684_AA1171540	0	0	0	37	39	31	0	0	0	Xylanase inhibitor, N-terminal
TRIAE_CS42_4DS_TGACv1_361684_AA1171560	2613	2460	2660	15355	11231	10557	3388	2507	2767	consensus disorder prediction
TRIAE_CS42_4DS_TGACv1_361796_AA1172850	10	16	7	93	91	62	37	6	7	Ubiquitin-conjugating enzyme/RWD-like
TRIAE_CS42_4DS_TGACv1_361925_AA1174360	7	1	5	28	19	26	24	10	12	#N/A
TRIAE_CS42_4DS_TGACv1_361936_AA1174500	5	2	1	64	57	38	2	0	1	#N/A
TRIAE_CS42_4DS_TGACv1_361936_AA1174510	322	275	236	10979	7104	7741	781	173	184	Lysine-tRNA ligase, class II
TRIAE_CS42_4DS_TGACv1_361963_AA1174760	11	5	3	38	29	26	9	3	2	Transcription factor GRAS
TRIAE_CS42_4DS_TGACv1_361964_AA1174820	25	34	29	417	443	317	124	71	59	HSP20-like chaperone
TRIAE_CS42_4DS_TGACv1_361975_AA1175050	6	8	5	51	27	38	8	18	13	NAC domain
TRIAE_CS42_4DS_TGACv1_361977_AA1175170	9	1	3	1109	1210	1087	16	4	1	R3H domain
TRIAE_CS42_4DS_TGACv1_361988_AA1175370	350	264	225	2749	1933	2100	620	351	342	Fungal lipase-like domain
TRIAE_CS42_4DS_TGACv1_362029_AA1175940	234	243	282	1937	1014	1601	482	417	662	consensus disorder prediction
TRIAE_CS42_4DS_TGACv1_362080_AA1176530	1	3	2	13	10	25	4	3	2	consensus disorder prediction
TRIAE_CS42_4DS_TGACv1_362100_AA1176800	0	1	2	99	132	81	4	0	1	Inosine triphosphate pyrophosphatase-like
TRIAE_CS42_4DS_TGACv1_362243_AA1178160	302	232	233	2435	1614	1585	185	173	243	consensus disorder prediction
TRIAE_CS42_4DS_TGACv1_362249_AA1178220	21	2	10	206	144	159	47	12	35	EF-hand domain
TRIAE_CS42_4DS_TGACv1_362406_AA1179560	1	5	0	2177	1616	1694	190	4	0	Eukaryotic translation initiation factor 3 subunit G, N-terminal
TRIAE_CS42_4DS_TGACv1_362497_AA1180120	9	1	5	34	23	27	2	3	5	EF-hand domain pair
TRIAE_CS42_4DS_TGACv1_362508_AA1180190	6	5	3	166	38	46	7	4	4	Protein kinase-like domain
TRIAE_CS42_4DS_TGACv1_362549_AA1180530	382	323	426	2619	1775	2553	1109	629	951	F-box domain
TRIAE_CS42_4DS_TGACv1_362712_AA1181700	84	82	109	3309	2437	2166	175	99	107	Maf-like protein
TRIAE_CS42_4DS_TGACv1_362836_AA1182350	0	0	0	7	4	8	0	0	0	Reverse transcriptase zinc-binding domain
TRIAE_CS42_4DS_TGACv1_363014_AA1183040	0	0	1	210	306	215	2	3	0	AP2/ERF domain
TRIAE_CS42_4DS_TGACv1_363437_AA1183850	25	28	32	1117	458	676	54	30	39	Actin cross-linking
TRIAE_CS42_4DS_TGACv1_367469_AA1184620	3	2	6	17	13	20	6	7	10	F-box domain
TRIAE_CS42_5AL_TGACv1_373966_AA1185670	20	14	7	148	75	58	3	19	2	WRKY domain
TRIAE_CS42_5AL_TGACv1_373980_AA1186340	22	8	1	54	42	40	13	30	48	consensus disorder prediction
TRIAE_CS42_5AL_TGACv1_373983_AA1186440	330	255	299	8159	4004	6577	2052	614	668	Mitochondrial substrate/solute carrier
TRIAE_CS42_5AL_TGACv1_373990_AA1186710	0	0	0	14	15	13	1	1	0	Uncharacterised protein family UPF0114
TRIAE_CS42_5AL_TGACv1_374059_AA1189090	135	85	120	1351	581	946	195	42	59	Multi antimicrobial extrusion protein
TRIAE_CS42_5AL_TGACv1_374078_AA1189700	18	32	34	214	176	189	22	21	39	Protein kinase domain
TRIAE_CS42_5AL_TGACv1_374088_AA1189980	197	166	145	1097	784	799	328	458	657	consensus disorder prediction
TRIAE_CS42_5AL_TGACv1_374092_AA1190100	26	19	24	143	148	85	114	36	41	Nucleotide-binding alpha-beta plait domain
TRIAE_CS42_5AL_TGACv1_374107_AA1190510	1	1	1	21	18	12	1	1	2	#N/A
TRIAE_CS42_5AL_TGACv1_374125_AA1190970	82	93	62	563	487	381	78	72	46	consensus disorder prediction
TRIAE_CS42_5AL_TGACv1_374131_AA1191260	8	10	7	43	35	41	2	3	4	#N/A
TRIAE_CS42_5AL_TGACv1_374155_AA1191910	531	445	440	2858	2113	2680	534	229	282	Cytochrome P450
TRIAE_CS42_5AL_TGACv1_374191_AA1193090	9	1	2	20	27	19	9	13	10	consensus disorder prediction
TRIAE_CS42_5AL_TGACv1_374242_AA1194820	10	81	33	282	354	337	3539	143	65	Alpha/beta hydrolase fold-1
TRIAE_CS42_5AL_TGACv1_374272_AA1195690	1	0	0	8	6	8	0	0	0	#N/A
TRIAE_CS42_5AL_TGACv1_374312_AA1196640	490	358	422	2741	1069	1882	457	466	682	NADPH oxidase Respiratory burst
TRIAE_CS42_5AL_TGACv1_374359_AA1197900	274	280	295	1781	1086	1321	471	426	363	Zinc finger, RING-type, conserved site
TRIAE_CS42_5AL_TGACv1_374390_AA1198600	1	0	1	31	9	11	1	0	0	#N/A
TRIAE_CS42_5AL_TGACv1_374409_AA1199500	5	2	5	15	18	18	50	6	32	#N/A
TRIAE_CS42_5AL_TGACv1_374507_AA1201930	13	15	11	201	258	185	35	10	24	Acyl-CoA N-acyltransferase
TRIAE_CS42_5AL_TGACv1_374543_AA1202830	5	0	5	51	18	22	0	0	3	Multicopper oxidase, type 3
TRIAE_CS42_5AL_TGACv1_374569_AA1203500	206	118	154	1703	908	1084	255	213	226	Oxoglutarate/iron-dependent dioxygenase
TRIAE_CS42_5AL_TGACv1_374620_AA1204650	7	3	1	120	82	96	14	9	4	#N/A
TRIAE_CS42_5AL_TGACv1_374631_AA1204930	21	9	7	161	141	100	22	11	8	NAC domain
TRIAE_CS42_5AL_TGACv1_374656_AA1205730	10	19	13	2085	980	1575	221	41	73	Protein of unknown function DUF4228, plant
TRIAE_CS42_5AL_TGACv1_374689_AA1206590	723	657	691	9870	8012	8545	2459	1246	1291	Alpha/Beta hydrolase fold
TRIAE_CS42_5AL_TGACv1_374707_AA1207080	1	2	0	9	22	13	10	0	1	Domain of unknown function DUF2828
TRIAE_CS42_5AL_TGACv1_374802_AA1209180	52	50	42	497	380	685	193	48	131	consensus disorder prediction
TRIAE_CS42_5AL_TGACv1_374821_AA1209580	111	141	144	5983	5808	5954	7219	1473	972	Cytochrome P450, conserved site
TRIAE_CS42_5AL_TGACv1_374821_AA1209600	22	22	12	194	502	318	91	28	27	Cytochrome P450, conserved site
TRIAE_CS42_5AL_TGACv1_374860_AA1210360	307	268	201	1558	1049	1150	92	95	115	consensus disorder prediction
TRIAE_CS42_5AL_TGACv1_374864_AA1210460	42	40	73	384	210	262	146	172	210	Glycosyl transferase, family 31
TRIAE_CS42_5AL_TGACv1_374870_AA1210670	0	0	0	67	23	46	0	0	0	#N/A
TRIAE_CS42_5AL_TGACv1_374870_AA1210700	5	1	0	41	41	59	2	0	0	Tryptophan synthase, alpha chain
TRIAE_CS42_5AL_TGACv1_374876_AA1210810	23	38	25	271	229	221	23	30	47	Leucine zipper, homeobox-associated
TRIAE_CS42_5AL_TGACv1_374903_AA1211440	71	17	24	1063	580	887	70	24	61	consensus disorder prediction
TRIAE_CS42_5AL_TGACv1_374929_AA1212280	513	434	419	4008	3051	3562	1411	1418	1637	#N/A
TRIAE_CS42_5AL_TGACv1_374929_AA1212290	19	17	17	99	62	85	41	16	25	Thaumatin
TRIAE_CS42_5AL_TGACv1_374973_AA1213060	4	1	2	196	170	233	84	4	1	#N/A
TRIAE_CS42_5AL_TGACv1_374973_AA1213070	0	0	0	10	9	6	0	0	0	F-box domain
TRIAE_CS42_5AL_TGACv1_374979_AA1213160	47	30	24	313	242	229	106	84	75	ENTH/VHS
TRIAE_CS42_5AL_TGACv1_374995_AA1213610	2	3	5	73	49	39	3	2	1	Ribonuclease H-like domain
TRIAE_CS42_5AL_TGACv1_375015_AA1214010	0	0	4	177	108	127	48	7	6	Zinc finger, C2H2
TRIAE_CS42_5AL_TGACv1_375018_AA1214100	64	58	89	343	317	343	120	104	99	Concanavalin A-like lectin/glucanase domain
TRIAE_CS42_5AL_TGACv1_375026_AA1214240	1381	1350	1528	12865	6221	9989	3616	2458	3009	NADPH oxidase subgroup (NOX)
TRIAE_CS42_5AL_TGACv1_375068_AA1215200	56	46	35	486	166	340	172	62	68	#N/A
TRIAE_CS42_5AL_TGACv1_375074_AA1215470	12	2	5	261	196	220	24	17	52	Zinc finger, C2H2
TRIAE_CS42_5AL_TGACv1_375074_AA1215530	14	6	17	364	273	275	278	34	43	Zinc finger, C2H2
TRIAE_CS42_5AL_TGACv1_375086_AA1215810	34	21	23	228	205	177	24	17	19	Alpha/Beta hydrolase fold
TRIAE_CS42_5AL_TGACv1_375112_AA1216220	1102	1002	1230	8238	2270	5195	729	662	837	AAA+ ATPase domain
TRIAE_CS42_5AL_TGACv1_375200_AA1217570	655	622	650	4526	2908	3247	867	532	723	Cytochrome P450
TRIAE_CS42_5AL_TGACv1_375316_AA1219720	94	73	43	363	261	347	132	58	47	Plant disease resistance response protein
TRIAE_CS42_5AL_TGACv1_375378_AA1220660	212	195	137	1243	681	763	140	102	89	WRKY domain
TRIAE_CS42_5AL_TGACv1_375383_AA1220810	18	15	17	131	145	130	20	24	15	consensus disorder prediction
TRIAE_CS42_5AL_TGACv1_375383_AA1220830	166	110	139	808	455	599	156	128	114	CALMODULIN-BINDING PROTEIN60
TRIAE_CS42_5AL_TGACv1_375595_AA1224190	61	24	50	340	212	266	59	29	43	RmlC-like cupin domain
TRIAE_CS42_5AL_TGACv1_375686_AA1225650	213	209	231	1182	731	902	103	119	140	#N/A
TRIAE_CS42_5AL_TGACv1_375727_AA1226210	2	3	3	511	445	563	75	2	7	#N/A
TRIAE_CS42_5AL_TGACv1_375761_AA1226810	7	1	9	976	552	559	5	5	23	Copine
TRIAE_CS42_5AL_TGACv1_375786_AA1227140	21	27	7	414	194	393	96	30	32	#N/A
TRIAE_CS42_5AL_TGACv1_375786_AA1227160	66	77	48	3572	2444	2454	249	87	184	Myc-type, basic helix-loop-helix (bHLH) domain
TRIAE_CS42_5AL_TGACv1_375801_AA1227370	0	0	0	10	4	6	2	0	0	Reverse transcriptase domain
TRIAE_CS42_5AL_TGACv1_375823_AA1227600	3	1	3	56	16	33	2	8	1	#N/A
TRIAE_CS42_5AL_TGACv1_375932_AA1229060	0	0	0	8	15	9	0	1	2	Zinc finger, C2H2
TRIAE_CS42_5AL_TGACv1_375932_AA1229070	1	1	3	114	75	85	21	11	62	Zinc finger, C2H2
TRIAE_CS42_5AL_TGACv1_375937_AA1229100	600	120	228	2151	1497	1621	103	49	62	consensus disorder prediction
TRIAE_CS42_5AL_TGACv1_375952_AA1229310	1	0	0	75	32	37	73	1	0	NAC domain
TRIAE_CS42_5AL_TGACv1_376042_AA1231170	61	47	50	277	230	164	141	113	128	Glycoside hydrolase superfamily
TRIAE_CS42_5AL_TGACv1_376044_AA1231240	511	68	212	2394	2073	2000	34	33	55	WRKY domain
TRIAE_CS42_5AL_TGACv1_376053_AA1231490	1031	820	783	13913	6514	9333	2172	1870	2132	Tetraspanin
TRIAE_CS42_5AL_TGACv1_376058_AA1231650	2	4	2	17	20	10	8	5	4	consensus disorder prediction
TRIAE_CS42_5AL_TGACv1_376140_AA1232700	0	0	2	10	11	5	0	1	1	Serpin domain
TRIAE_CS42_5AL_TGACv1_376148_AA1232840	2	2	4	22	16	17	2	1	12	AMP-binding enzyme C-terminal domain
TRIAE_CS42_5AL_TGACv1_376163_AA1233010	237	269	187	1719	696	1014	778	645	715	Actin cross-linking
TRIAE_CS42_5AL_TGACv1_376167_AA1233120	9	11	5	49	31	39	21	11	8	Reverse transcriptase zinc-binding domain
TRIAE_CS42_5AL_TGACv1_376245_AA1234380	29	28	34	6516	3814	4960	273	41	24	AsxRS_core
TRIAE_CS42_5AL_TGACv1_376274_AA1234820	2826	2754	2692	15076	12126	10915	1107	1482	1294	consensus disorder prediction
TRIAE_CS42_5AL_TGACv1_376286_AA1234920	109	93	97	671	290	503	221	144	172	Solute-binding protein family 3/N-terminal domain of MltF
TRIAE_CS42_5AL_TGACv1_376389_AA1236190	63	89	90	1458	1188	1542	318	121	138	#N/A
TRIAE_CS42_5AL_TGACv1_376389_AA1236200	17	18	5	74	53	47	16	9	7	Pentatricopeptide repeat
TRIAE_CS42_5AL_TGACv1_376442_AA1236920	3	13	7	52	20	35	10	6	4	consensus disorder prediction
TRIAE_CS42_5AL_TGACv1_376518_AA1237980	107	92	108	620	395	495	65	75	99	#N/A
TRIAE_CS42_5AL_TGACv1_376518_AA1237990	91	111	86	751	314	531	92	45	106	#N/A
TRIAE_CS42_5AL_TGACv1_376547_AA1238290	219	314	443	3714	2534	3543	5240	459	384	Cytochrome P450, conserved site
TRIAE_CS42_5AL_TGACv1_376624_AA1239230	7	8	8	37	33	30	12	7	2	#N/A
TRIAE_CS42_5AL_TGACv1_376676_AA1239810	0	0	0	10	14	5	1	2	3	Reverse transcriptase zinc-binding domain
TRIAE_CS42_5AL_TGACv1_376676_AA1239820	187	151	235	1232	847	710	75	83	74	consensus disorder prediction
TRIAE_CS42_5AL_TGACv1_376743_AA1240570	79	68	113	723	416	486	66	40	44	#N/A
TRIAE_CS42_5AL_TGACv1_376855_AA1241580	0	0	0	63	40	68	0	1	0	Zinc finger, RING-type
TRIAE_CS42_5AL_TGACv1_376855_AA1241590	1	0	0	15	6	4	0	0	0	RING
TRIAE_CS42_5AL_TGACv1_376855_AA1241600	2	0	6	57	24	32	6	0	6	Zinc finger, RING-type
TRIAE_CS42_5AL_TGACv1_376855_AA1241610	2	0	0	13	8	11	1	2	3	RING
TRIAE_CS42_5AL_TGACv1_376929_AA1242500	49	27	51	727	308	620	40	32	32	#N/A
TRIAE_CS42_5AL_TGACv1_376981_AA1242930	9	0	0	35	64	32	4	1	7	AP2/ERF domain
TRIAE_CS42_5AL_TGACv1_376992_AA1243070	13	3	9	48	50	41	11	8	5	#N/A
TRIAE_CS42_5AL_TGACv1_376998_AA1243120	98	42	80	5725	3232	3738	389	192	212	Alpha/Beta hydrolase fold
TRIAE_CS42_5AL_TGACv1_377037_AA1243460	4	5	4	71	54	64	38	4	6	Leucine-rich repeat domain, L domain-like
TRIAE_CS42_5AL_TGACv1_377078_AA1243870	3	6	2	11	17	19	32	5	3	ATP-binding cassette transporter, PDR-like subfamily G, domain 1
TRIAE_CS42_5AL_TGACv1_377211_AA1244910	9	10	8	127	44	56	30	3	1	consensus disorder prediction
TRIAE_CS42_5AL_TGACv1_377291_AA1245660	1	8	4	353	157	371	0	3	10	SGNH_plant_lipase_like
TRIAE_CS42_5AL_TGACv1_377350_AA1246120	1	5	3	12	15	20	8	1	0	#N/A
TRIAE_CS42_5AL_TGACv1_377382_AA1246340	1216	345	735	8904	4548	5888	678	416	556	#N/A
TRIAE_CS42_5AL_TGACv1_377390_AA1246460	22	15	14	132	73	71	48	26	19	#N/A
TRIAE_CS42_5AL_TGACv1_377408_AA1246590	199	205	180	2432	665	1686	406	299	429	P-loop containing nucleoside triphosphate hydrolase
TRIAE_CS42_5AL_TGACv1_377443_AA1246860	44	39	31	238	124	205	113	91	82	RT_LTR
TRIAE_CS42_5AL_TGACv1_377565_AA1247970	2	2	0	161	116	120	3	4	8	Zinc finger, C2H2
TRIAE_CS42_5AL_TGACv1_377591_AA1248160	7	4	6	33	22	21	2	7	5	#N/A
TRIAE_CS42_5AL_TGACv1_377599_AA1248230	20	11	13	88	52	61	38	43	46	PLAC8 motif-containing protein
TRIAE_CS42_5AL_TGACv1_377644_AA1248500	38	49	35	1016	466	715	77	11	18	DNA-binding domain
TRIAE_CS42_5AL_TGACv1_377650_AA1248560	3	3	3	190	263	199	21	4	10	Alpha crystallin/Hsp20 domain
TRIAE_CS42_5AL_TGACv1_377737_AA1249090	192	184	185	1948	1361	1499	564	647	639	Aspartic peptidase domain
TRIAE_CS42_5AL_TGACv1_377911_AA1250090	2	0	1	14	10	5	2	1	1	#N/A
TRIAE_CS42_5AL_TGACv1_378280_AA1252530	5	0	2	30	20	10	6	2	3	consensus disorder prediction
TRIAE_CS42_5AL_TGACv1_378450_AA1253440	7	5	8	473	384	380	322	26	62	#N/A
TRIAE_CS42_5AL_TGACv1_378930_AA1255070	0	0	1	734	351	533	6	3	3	F-box domain
TRIAE_CS42_5AL_TGACv1_378946_AA1255150	3	0	1	31	20	20	4	1	2	Zinc finger, AN1-type
TRIAE_CS42_5AL_TGACv1_379274_AA1256020	25	12	11	166	80	164	58	27	29	Calcineurin-like phosphoesterase domain, ApaH type
TRIAE_CS42_5AL_TGACv1_379331_AA1256080	78	77	74	3104	1504	2100	324	184	187	Tify domain
TRIAE_CS42_5AL_TGACv1_379622_AA1256590	355	375	356	6586	2998	3775	1186	1269	1189	#N/A
TRIAE_CS42_5AL_TGACv1_379733_AA1256770	7	1	0	30	22	22	5	2	1	NADP-dependent oxidoreductase domain
TRIAE_CS42_5AL_TGACv1_379839_AA1256950	2	0	3	10	16	19	0	0	0	#N/A
TRIAE_CS42_5AL_TGACv1_380108_AA1257250	238	254	327	3590	1968	2266	892	425	461	Mss4-like
TRIAE_CS42_5AL_TGACv1_380684_AA1257530	186	67	161	615	584	587	290	289	221	#N/A
TRIAE_CS42_5AL_TGACv1_382846_AA1257990	36	30	19	217	48	136	70	25	14	Cupin 1
TRIAE_CS42_5AL_TGACv1_390875_AA1258920	8	3	8	70	19	43	23	4	9	Germin
TRIAE_CS42_5AL_TGACv1_729459_AA2172130	24	41	50	471	91	315	200	45	67	Germin, manganese binding site
TRIAE_CS42_5AS_TGACv1_392488_AA1259390	0	0	0	12	17	15	0	0	0	LURP1-related protein domain
TRIAE_CS42_5AS_TGACv1_392495_AA1259560	2	2	2	27	25	13	12	11	2	Domain of unknown function DUF629
TRIAE_CS42_5AS_TGACv1_392521_AA1259860	349	250	252	1876	1310	1440	422	534	638	#N/A
TRIAE_CS42_5AS_TGACv1_392748_AA1264020	31	1	12	138	71	199	2	1	9	NAD(P)-binding domain
TRIAE_CS42_5AS_TGACv1_392783_AA1264600	3	8	4	281	150	213	22	4	7	consensus disorder prediction
TRIAE_CS42_5AS_TGACv1_393130_AA1268840	67	16	51	196	212	213	25	32	38	Protein of unknown function DUF1719
TRIAE_CS42_5AS_TGACv1_393382_AA1272040	2	5	2	11	20	15	3	4	2	WD40 repeat
TRIAE_CS42_5AS_TGACv1_393415_AA1272200	8	9	12	72	20	39	2	5	1	Domain of unknown function DUF1618
TRIAE_CS42_5AS_TGACv1_393499_AA1273300	13	10	9	82	77	48	3	6	5	#N/A
TRIAE_CS42_5AS_TGACv1_393631_AA1274680	7	3	11	42	19	37	145	30	11	Terpenoid cyclases/protein prenyltransferase alpha-alpha toroid
TRIAE_CS42_5AS_TGACv1_393696_AA1275280	2901	2891	2718	15230	9569	12634	4271	3972	4059	Ubiquitin domain
TRIAE_CS42_5AS_TGACv1_393820_AA1276260	26	9	13	287	143	196	55	30	29	UDP-glucuronosyl/UDP-glucosyltransferase
TRIAE_CS42_5AS_TGACv1_394157_AA1278460	6	5	4	43	37	36	27	10	6	Aspartic peptidase, active site
TRIAE_CS42_5AS_TGACv1_394391_AA1280030	37	9	10	111	122	82	8	8	9	Zinc finger, RING-type
TRIAE_CS42_5AS_TGACv1_394422_AA1280290	76	70	85	545	420	488	385	216	218	HSR1_MMR1
TRIAE_CS42_5AS_TGACv1_394571_AA1281060	2	0	0	118	167	163	0	0	7	NAD-dependent epimerase/dehydratase
TRIAE_CS42_5AS_TGACv1_394608_AA1281230	6	3	1	16	17	21	7	5	14	Zinc finger, RING-type
TRIAE_CS42_5BL_TGACv1_404143_AA1286460	361	149	269	4938	3115	4843	1496	344	444	ATP-binding cassette transporter, PDR-like subfamily G, domain 1
TRIAE_CS42_5BL_TGACv1_404159_AA1287370	0	0	3	24	11	8	1	0	0	Phosphatidic acid phosphatase type 2/haloperoxidase
TRIAE_CS42_5BL_TGACv1_404178_AA1288370	19	14	16	109	69	82	16	16	11	Pentatricopeptide repeat
TRIAE_CS42_5BL_TGACv1_404180_AA1288530	464	186	225	2694	1812	1890	588	244	318	consensus disorder prediction
TRIAE_CS42_5BL_TGACv1_404180_AA1288540	37	26	13	388	127	247	138	26	24	consensus disorder prediction
TRIAE_CS42_5BL_TGACv1_404184_AA1288850	14	15	16	868	480	745	31	6	22	GNAT domain
TRIAE_CS42_5BL_TGACv1_404184_AA1288900	45	18	36	1294	509	1044	152	53	80	#N/A
TRIAE_CS42_5BL_TGACv1_404188_AA1289140	16	20	14	138	35	71	51	38	43	consensus disorder prediction
TRIAE_CS42_5BL_TGACv1_404222_AA1291220	211	224	276	1872	2047	2716	6813	1149	1143	Cytochrome P450
TRIAE_CS42_5BL_TGACv1_404236_AA1291590	18	29	35	291	171	236	21	9	14	Homeobox domain
TRIAE_CS42_5BL_TGACv1_404247_AA1292110	4	10	3	33	41	23	2	0	3	PPM-type phosphatase domain
TRIAE_CS42_5BL_TGACv1_404250_AA1292270	105	89	100	552	421	459	226	253	198	Mitochondrial substrate/solute carrier
TRIAE_CS42_5BL_TGACv1_404267_AA1293000	43	57	26	769	335	551	30	5	13	DNA-binding domain
TRIAE_CS42_5BL_TGACv1_404309_AA1294930	6	9	13	88	72	99	39	12	6	consensus disorder prediction
TRIAE_CS42_5BL_TGACv1_404312_AA1295090	8	22	48	146	91	229	143	26	84	Transferase
TRIAE_CS42_5BL_TGACv1_404316_AA1295270	1327	1120	1176	9658	5574	7428	1711	1857	2176	#N/A
TRIAE_CS42_5BL_TGACv1_404327_AA1295690	9	10	10	66	57	76	21	41	20	PLAC8 motif-containing protein
TRIAE_CS42_5BL_TGACv1_404378_AA1297530	22	21	19	173	81	138	28	28	40	LURP1-related protein domain
TRIAE_CS42_5BL_TGACv1_404388_AA1298050	2	5	3	15	18	11	10	2	6	#N/A
TRIAE_CS42_5BL_TGACv1_404407_AA1298690	48	47	37	382	186	237	54	56	38	Domain of unknown function DUF4094
TRIAE_CS42_5BL_TGACv1_404457_AA1300500	169	137	268	1962	1902	1726	783	480	439	Alanine racemase/group IV decarboxylase, C-terminal
TRIAE_CS42_5BL_TGACv1_404484_AA1301580	337	99	103	955	719	745	293	156	174	EF-hand domain
TRIAE_CS42_5BL_TGACv1_404494_AA1301950	6	1	4	30	14	24	4	12	7	consensus disorder prediction
TRIAE_CS42_5BL_TGACv1_404507_AA1302460	236	268	226	1730	931	1294	777	820	861	#N/A
TRIAE_CS42_5BL_TGACv1_404540_AA1303440	1	0	0	5	7	9	0	1	0	#N/A
TRIAE_CS42_5BL_TGACv1_404540_AA1303450	4	3	5	474	327	330	15	7	4	Leucine-rich repeat domain, L domain-like
TRIAE_CS42_5BL_TGACv1_404543_AA1303670	69	61	66	1158	642	732	39	54	47	HLH
TRIAE_CS42_5BL_TGACv1_404565_AA1304390	24	2	9	191	229	200	57	11	29	consensus disorder prediction
TRIAE_CS42_5BL_TGACv1_404578_AA1304820	186	206	281	1863	1065	1662	452	317	377	consensus disorder prediction
TRIAE_CS42_5BL_TGACv1_404599_AA1305710	0	0	1	31	23	29	0	0	0	#N/A
TRIAE_CS42_5BL_TGACv1_404629_AA1306750	0	0	1	9	13	6	9	1	1	Domain of unknown function DUF2828
TRIAE_CS42_5BL_TGACv1_404646_AA1307240	44	15	42	502	293	332	23	32	22	EF-hand domain
TRIAE_CS42_5BL_TGACv1_404657_AA1307570	2	0	0	3	19	23	32	2	1	#N/A
TRIAE_CS42_5BL_TGACv1_404758_AA1310270	10	9	8	85	77	70	105	22	25	RNA polymerase II, heptapeptide repeat, eukaryotic
TRIAE_CS42_5BL_TGACv1_404818_AA1311750	19	10	3	375	324	260	21	33	75	Cytochrome P450
TRIAE_CS42_5BL_TGACv1_404826_AA1312020	1	1	1	18	15	7	1	1	0	Zinc finger, RING-type
TRIAE_CS42_5BL_TGACv1_404826_AA1312030	14	2	2	81	61	40	6	7	7	Zinc finger, RING-type
TRIAE_CS42_5BL_TGACv1_404826_AA1312040	0	0	0	10	19	19	0	2	0	Zinc finger, RING-type
TRIAE_CS42_5BL_TGACv1_404911_AA1314600	13	11	10	99	53	59	38	24	17	Metallo-dependent phosphatase-like
TRIAE_CS42_5BL_TGACv1_405047_AA1318750	2	0	0	23	22	18	36	0	0	#N/A
TRIAE_CS42_5BL_TGACv1_405078_AA1319460	416	424	399	8903	5069	6850	471	230	205	Multi antimicrobial extrusion protein
TRIAE_CS42_5BL_TGACv1_405078_AA1319470	4	7	4	36	27	24	5	4	2	von Willebrand factor, type A
TRIAE_CS42_5BL_TGACv1_405098_AA1319840	5	4	0	28	8	23	9	8	11	NAD(P)-binding domain
TRIAE_CS42_5BL_TGACv1_405098_AA1319910	6	5	6	522	368	460	29	8	15	Protein of unknown function DUF4228, plant
TRIAE_CS42_5BL_TGACv1_405119_AA1320510	31	6	18	1179	1237	1101	80	26	37	Zinc finger, C2H2
TRIAE_CS42_5BL_TGACv1_405121_AA1320610	12	23	8	111	73	91	20	8	27	consensus disorder prediction
TRIAE_CS42_5BL_TGACv1_405122_AA1320640	1300	418	808	9611	4774	7318	1627	1202	1853	#N/A
TRIAE_CS42_5BL_TGACv1_405129_AA1320770	75	56	80	740	277	539	295	145	137	#N/A
TRIAE_CS42_5BL_TGACv1_405144_AA1321090	8	3	2	46	15	17	5	2	2	L-ascorbate oxidase, plants
TRIAE_CS42_5BL_TGACv1_405196_AA1321990	181	123	181	1757	996	1308	229	231	230	Galectin, carbohydrate recognition domain
TRIAE_CS42_5BL_TGACv1_405225_AA1322480	22	41	30	360	292	264	62	53	73	consensus disorder prediction
TRIAE_CS42_5BL_TGACv1_405230_AA1322730	22	11	7	74	88	66	7	6	4	consensus disorder prediction
TRIAE_CS42_5BL_TGACv1_405294_AA1324250	300	271	296	4142	1341	2924	495	452	610	ABC transporter-like
TRIAE_CS42_5BL_TGACv1_405322_AA1324930	28	4	15	355	165	262	51	24	40	RmlC-like jelly roll fold
TRIAE_CS42_5BL_TGACv1_405327_AA1325060	0	0	0	4	8	6	1	0	2	consensus disorder prediction
TRIAE_CS42_5BL_TGACv1_405338_AA1325370	26	40	27	194	82	143	57	43	24	#N/A
TRIAE_CS42_5BL_TGACv1_405340_AA1325390	8	9	15	305	252	268	258	41	43	Zinc finger, C2H2
TRIAE_CS42_5BL_TGACv1_405341_AA1325520	17	9	9	126	67	64	39	13	8	Protein of unknown function DUF761, plant
TRIAE_CS42_5BL_TGACv1_405380_AA1326080	145	26	54	729	550	494	10	1	16	WRKY domain
TRIAE_CS42_5BL_TGACv1_405422_AA1326990	584	525	605	4824	3876	4277	1656	722	797	Alpha/Beta hydrolase fold
TRIAE_CS42_5BL_TGACv1_405422_AA1327030	1	0	1	6	10	11	4	1	1	Serine carboxypeptidases, histidine active site
TRIAE_CS42_5BL_TGACv1_405449_AA1327620	4	5	2	43	23	23	6	7	4	consensus disorder prediction
TRIAE_CS42_5BL_TGACv1_405488_AA1328490	5	6	1	27	14	17	3	3	5	consensus disorder prediction
TRIAE_CS42_5BL_TGACv1_405497_AA1328710	827	475	507	3931	1825	2729	747	779	1105	Syntaxin, N-terminal domain
TRIAE_CS42_5BL_TGACv1_405499_AA1328770	1	6	3	30	41	28	18	1	3	von Willebrand factor, type A
TRIAE_CS42_5BL_TGACv1_405521_AA1329410	0	1	1	8	8	9	1	5	3	#N/A
TRIAE_CS42_5BL_TGACv1_405530_AA1329540	1	3	1	14	10	9	8	2	1	consensus disorder prediction
TRIAE_CS42_5BL_TGACv1_405552_AA1330060	1	2	3	109	80	118	23	4	7	AP2/ERF domain
[truncated: 1,736 more rows]

## Sheet: ABA-dependent signalling 24 h
Genes in red were up-regulated at 24 h osmotic stress, and the genes in green were down-regulated at 24 h osmotic stress in ABA-dependent signalling pathway.
Gene_id	CK_24 h (1)	CK_24 h (2)	CK_24 h (3)	PEG_24 h (1)	PEG_24 h (2)	PEG_24 h (3)	ABA_24 h (1)	ABA_24 h (2)	ABA_24 h (3)	Gene description
Novel00005	2	5	2	21	13	16	10	12	8	hypothetical protein TRIUR3_27912 [Triticum urartu]
Novel00037	9	12	9	102	143	111	34	31	94	Subtilisin-like protease SDD1 [Triticum urartu]
Novel00045	15	22	15	206	93	62	70	43	103	#N/A
Novel00049	0	0	6	7	14	10	35	46	99	Wall-associated receptor kinase 3 [Aegilops tauschii]
Novel00208	0	1	4	23	17	16	335	257	268	Disease resistance protein RPP13 [Aegilops tauschii]
Novel00211	12	5	14	674	650	980	1046	1178	1641	hypothetical protein TRIUR3_27239 [Triticum urartu]
Novel00292	0	0	1	6	5	12	3	3	10	Putative zinc finger protein [Aegilops tauschii]
Novel00387	10	4	6	121	142	93	30	19	10	predicted protein [Hordeum vulgare subsp. vulgare]
Novel00410	804	1003	1311	4091	3502	4851	5946	7904	6176	putative glutathione S-transferase GSTF1 [Triticum urartu]
Novel00417	0	0	0	28	32	5	402	322	145	Low temperature-induced protein [Aegilops tauschii]
Novel00422	6	0	1	16	18	26	11	6	22	hypothetical protein F775_22572 [Aegilops tauschii]
Novel00495	17	16	15	79	64	65	525	534	521	hypothetical protein F775_16633 [Aegilops tauschii]
Novel00529	3	3	7	86	67	65	76	76	206	hypothetical protein TRIUR3_01061 [Triticum urartu]
Novel00552	1	2	4	21	25	34	40	32	50	putative anion transporter 7 [Triticum urartu]
Novel00566	68	45	37	192	279	245	149	151	283	hypothetical protein TRIUR3_34012 [Triticum urartu]
Novel00606	1	0	4	49	52	41	1595	1058	1354	#N/A
Novel00692	13	4	8	217	192	61	2511	2698	2806	TPA: plant-specific domain TIGR01568 family protein [Zea mays]>gi|645168135|gb|AIB05652.1| OFP transcription factor, partial [Zea mays]
Novel00811	0	0	2	32	23	39	122	160	89	brassinosteroid-insensitive 1 [Triticum aestivum]
Novel00820	0	0	0	8	15	7	13	4	3	hypothetical protein TRIUR3_27955 [Triticum urartu]
Novel00845	11	5	16	156	161	63	4219	3661	3730	#N/A
Novel00949	0	0	1	50	81	195	31	57	137	hypothetical protein F775_24032 [Aegilops tauschii]
Novel01218	0	1	0	9	9	15	17	14	21	#N/A
Novel01241	2	0	1	32	34	45	8	13	32	Putative WRKY transcription factor 38 [Aegilops tauschii]
Novel01308	4	3	1	7	16	12	17	9	17	Sulfotransferase 17 [Aegilops tauschii]
Novel01393	22	39	74	366	283	532	420	381	885	hypothetical protein SORBIDRAFT_09g023900 [Sorghum bicolor]>gi|241945272|gb|EES18417.1| hypothetical protein SORBIDRAFT_09g023900 [Sorghum bicolor]
Novel01543	0	1	2	14	8	17	4	9	6	hypothetical protein TRIUR3_05839 [Triticum urartu]
Novel01545	4	3	2	46	41	27	463	336	191	Low temperature-induced protein [Aegilops tauschii]
Novel01588	22	9	5	369	365	399	2415	2460	3643	hypothetical protein TRIUR3_16882 [Triticum urartu]
Novel01724	55	13	31	1099	1091	164	20347	19465	19583	#N/A
Novel01734	1	1	0	10	18	22	5	6	9	PREDICTED: probable LRR receptor-like serine/threonine-protein kinase At3g47570 [Zea mays]
Novel01776	31	10	25	310	222	311	2795	2121	2847	#N/A
Novel01814	6	0	5	42	33	6	400	294	286	#N/A
Novel01827	217	155	230	777	779	890	520	444	941	predicted protein [Hordeum vulgare subsp. vulgare]
Novel01828	0	0	0	8	7	1	185	83	12	#N/A
Novel01832	20	23	64	419	371	420	180	129	113	putative cysteine desulfurase [Triticum urartu]
Novel01843	3	0	1	16	16	8	56	17	12	unnamed protein product [Triticum aestivum]
Novel02014	4	1	2	22	20	13	40	27	7	#N/A
Novel02042	9	4	7	31	26	79	16	22	22	hypothetical protein F775_24812 [Aegilops tauschii]
Novel02052	4	2	2	12	17	19	40	13	20	#N/A
Novel02149	54	34	67	1237	1046	1176	368	311	637	#N/A
Novel02150	0	1	1	95	76	50	10	11	32	#N/A
Novel02223	14	6	22	335	345	549	89	113	67	predicted protein [Hordeum vulgare subsp. vulgare]
Novel02235	0	0	1	3	8	6	9	9	4	hypothetical protein OsI_34068 [Oryza sativa Indica Group]
Novel02311	294	366	529	5170	4438	6979	2416	1998	3564	predicted protein [Hordeum vulgare subsp. vulgare]
Novel02351	0	0	0	13	27	17	220	137	115	Putative cysteine desulfurase [Aegilops tauschii]
Novel02376	2	2	0	12	9	20	57	59	66	hypothetical protein F775_24485 [Aegilops tauschii]
Novel02484	9	1	1	61	53	53	512	495	807	hypothetical protein TRIUR3_03612 [Triticum urartu]
Novel02606	6	7	19	204	239	292	253	212	326	hypothetical protein F775_52605 [Aegilops tauschii]
Novel02631	9	2	2	185	118	14	1929	1767	1134	predicted protein [Hordeum vulgare subsp. vulgare]
Novel02639	11	3	5	25	50	18	41	16	40	hypothetical protein F775_15371 [Aegilops tauschii]
Novel02645	8	3	3	95	67	39	1986	1857	2749	Acyltransferase-like protein [Aegilops tauschii]
Novel02687	0	4	0	75	37	6	807	862	872	predicted protein [Hordeum vulgare subsp. vulgare]
Novel02714	7	1	8	155	137	443	252	216	261	#N/A
Novel02826	1	1	1	8	13	16	8	5	11	hypothetical protein F775_17571 [Aegilops tauschii]
Novel02845	1	0	1	25	14	63	185	219	93	Os03g0237250 [Oryza sativa Japonica Group]>gi|255674351|dbj|BAH92065.1| Os03g0237250 [Oryza sativa Japonica Group]
Novel02975	15	5	8	290	142	85	2424	1163	428	hypothetical protein F775_08562 [Aegilops tauschii]
Novel03030	36	17	12	436	365	108	4186	4465	4388	hypothetical protein F775_52247 [Aegilops tauschii]
Novel03038	0	0	0	19	15	55	141	117	274	PREDICTED: ATP-dependent DNA helicase PIF1-like [Zea mays]
Novel03074	19	12	17	90	61	50	544	467	343	hypothetical protein F775_21354 [Aegilops tauschii]
Novel03107	45	69	112	804	652	1147	367	339	477	predicted protein [Hordeum vulgare subsp. vulgare]
Novel03111	13	20	13	141	137	153	51	32	110	predicted protein [Hordeum vulgare subsp. vulgare]
Novel03297	5	6	5	22	26	28	13	14	31	hypothetical protein F775_24119 [Aegilops tauschii]
Novel03307	28	32	55	242	347	516	79	71	182	heat shock factor protein 4 [Zea mays]
Novel03386	22	5	14	81	84	44	89	58	99	hypothetical protein TRIUR3_06504 [Triticum urartu]
Novel03478	51	42	68	931	650	1009	262	154	431	hypothetical protein F775_04286 [Aegilops tauschii]
Novel03501	3	2	0	40	55	0	1643	1718	2541	Os01g0630700 [Oryza sativa Japonica Group]>gi|255673487|dbj|BAH91204.1| Os01g0630700 [Oryza sativa Japonica Group]
Novel03581	1	0	3	29	26	62	7	10	22	gag-pol polyprotein [Zea mays]
Novel03692	0	0	0	18	5	5	597	556	280	#N/A
Novel03723	9	2	2	79	85	22	559	404	364	#N/A
Novel03882	5	3	4	20	17	14	26	22	43	hypothetical protein OsJ_15963 [Oryza sativa Japonica Group]
Novel03917	1	0	1	19	25	1	483	357	188	putative protein phosphatase 2C 12 [Triticum urartu]
Novel03926	2	1	4	18	28	25	323	236	349	RING finger protein 165 [Aegilops tauschii]
Novel04098	1	1	1	41	55	24	26	11	23	hypothetical protein TRIUR3_07214 [Triticum urartu]
Novel04101	3	4	13	116	134	281	170	135	191	hypothetical protein TRIUR3_09710 [Triticum urartu]
Novel04220	11	12	33	250	196	255	130	123	295	Subtilisin-like protease [Triticum urartu]
Novel04302	28	20	65	188	162	161	239	212	339	Subtilisin-like protease [Triticum urartu]
Novel04325	0	0	1	10	10	6	98	70	178	hypothetical protein TRIUR3_06504 [Triticum urartu]
Novel04405	1	2	1	8	4	12	62	35	39	#N/A
Novel04421	10	14	11	94	42	33	399	424	642	Tropinone reductase-like protein [Aegilops tauschii]
Novel04425	1	7	3	165	232	124	22	11	27	Putative calcium-binding protein CML31 [Aegilops tauschii]
Novel04482	0	0	0	9	4	5	89	54	67	hypothetical protein F775_05928 [Aegilops tauschii]
Novel04483	1	0	0	14	7	19	289	244	283	#N/A
Novel04665	2	0	2	42	72	53	17	12	30	Putative LRR receptor-like serine/threonine-protein kinase [Aegilops tauschii]
Novel04673	12	4	5	160	144	21	5206	4966	6522	#N/A
Novel04761	10	26	43	251	339	233	171	211	293	unnamed protein product [Triticum aestivum]
Novel04762	31	54	86	454	472	369	267	302	572	unnamed protein product [Triticum aestivum]
Novel04770	6	1	1	188	259	60	5495	5193	3450	unnamed protein product [Triticum aestivum]
Novel04785	18	13	7	639	571	532	4846	4241	6535	#N/A
Novel04823	14	8	4	139	71	98	2437	2526	3761	#N/A
Novel04922	2	1	4	30	43	28	19	17	11	#N/A
Novel05075	2	0	0	20	14	3	639	321	196	#N/A
Novel05083	2	1	1	83	46	13	445	406	209	predicted protein [Hordeum vulgare subsp. vulgare]
Novel05164	2	2	4	11	12	11	14	9	30	#N/A
Novel05180	5	1	3	19	17	13	64	70	45	Zinc finger protein ZPR1 [Aegilops tauschii]
Novel05203	7	9	1	31	50	28	21	22	26	#N/A
Novel05233	3	4	8	41	34	16	26	34	69	hypothetical protein OsJ_03139 [Oryza sativa Japonica Group]
Novel05355	4	8	8	32	22	33	40	45	72	Aspartic proteinase nepenthesin-1 [Aegilops tauschii]
Novel05411	5	4	7	31	26	26	61	37	33	AP-2 complex subunit mu [Aegilops tauschii]
Novel05448	7	5	8	74	171	294	12	19	34	Transposon Ty3-G Gag-Pol polyprotein [Triticum urartu]
Novel05477	21	18	15	75	76	66	123	97	169	putative reverse transcriptase [Oryza sativa Japonica Group]>gi|108711395|gb|ABF99190.1| retrotransposon protein, putative, LINE subclass [Oryza sativa Japonica Group]
Novel05497	2	0	1	41	31	14	572	387	241	#N/A
Novel05503	4	5	2	24	23	20	13	7	26	hypothetical protein TRIUR3_04372 [Triticum urartu]
Novel05648	0	0	0	8	9	6	259	282	132	predicted protein [Hordeum vulgare subsp. vulgare]
Novel05657	12	6	10	161	174	68	3455	3772	2904	unnamed protein product [Triticum aestivum]
Novel05757	6	7	16	378	287	652	1564	1456	1349	hypothetical protein F775_13911 [Aegilops tauschii]
Novel05804	4	4	7	69	46	26	1032	902	1324	hypothetical protein F775_09183 [Aegilops tauschii]
Novel05842	36	19	43	582	567	466	7041	6175	11028	Acyltransferase-like protein [Aegilops tauschii]
Novel05876	0	0	0	18	14	1	434	433	311	#N/A
Novel05878	0	1	1	8	12	14	17	10	12	hypothetical protein F775_52145 [Aegilops tauschii]
Novel05879	0	0	0	14	10	4	341	275	227	#N/A
Novel05896	4	11	14	282	305	36	3944	3825	3863	hypothetical protein F775_30593 [Aegilops tauschii]
Novel05963	3	1	5	21	35	19	17	14	4	hypothetical protein TRIUR3_25268 [Triticum urartu]
Novel05984	0	1	4	10	10	8	16	12	30	#N/A
Novel05990	9	7	29	169	263	432	1385	1307	2056	hypothetical protein F775_23973 [Aegilops tauschii]
Novel06024	44	41	61	207	241	316	304	361	462	#N/A
Novel06032	36	6	46	1214	889	1863	3027	2696	4518	#N/A
Novel06056	3	0	1	46	36	80	169	177	98	predicted protein [Hordeum vulgare subsp. vulgare]
Novel06080	3	5	1	18	16	16	35	23	16	#N/A
Novel06128	1	1	0	9	8	4	76	45	21	predicted protein [Hordeum vulgare subsp. vulgare]
Novel06202	1	2	0	6	11	6	235	210	90	hypothetical protein TRIUR3_30190 [Triticum urartu]
Novel06299	3	0	1	19	11	8	171	128	153	#N/A
Novel06418	0	3	1	23	16	4	116	74	77	GDSL esterase/lipase [Aegilops tauschii]
Novel06464	0	0	0	5	12	8	22	29	12	#N/A
Novel06466	0	0	0	3	2	8	40	40	54	PREDICTED: pheophorbide a oxygenase, chloroplastic-like [Brachypodium distachyon]
Novel06636	4	4	3	13	23	25	13	12	22	TPA: hypothetical protein ZEAMMB73_131539 [Zea mays]
Novel06682	0	0	1	8	5	8	5	2	9	#N/A
Novel06728	10	5	14	36	28	69	39	32	52	#N/A
Novel06779	0	0	0	8	7	24	43	47	81	#N/A
Novel06851	3	3	5	13	20	17	13	12	39	putative polyprotein [Oryza sativa Japonica Group]
Novel06900	4	0	5	154	93	5	1055	1595	1927	Myosin-J heavy chain [Triticum urartu]
Novel07015	13	14	10	62	54	62	55	38	66	Nucleosome assembly protein 1-like 1-A [Triticum urartu]
Novel07037	0	0	0	5	6	4	47	38	23	predicted protein [Hordeum vulgare subsp. vulgare]
Novel07076	10	4	26	110	80	73	56	29	28	predicted protein [Hordeum vulgare subsp. vulgare]
Novel07302	0	5	25	65	146	287	127	79	18	hypothetical protein TRIUR3_26271 [Triticum urartu]
Novel07405	0	0	0	14	18	0	401	173	97	#N/A
Novel07433	5	0	0	47	56	2	1422	1260	994	#N/A
Novel07434	1	2	0	30	36	0	635	446	313	#N/A
Novel07579	20	12	29	88	98	95	97	113	165	hypothetical protein TRIUR3_29840 [Triticum urartu]
Novel07582	118	130	306	1325	1522	1607	1459	1281	3654	hypothetical protein TRIUR3_01061 [Triticum urartu]
Novel07721	0	0	2	62	79	49	13	36	54	#N/A
Novel07742	27	27	35	82	148	171	62	60	166	E3 ubiquitin-protein ligase UBR4 [Triticum urartu]
Novel07753	5	11	17	136	140	96	658	730	538	predicted protein [Hordeum vulgare subsp. vulgare]
Novel07771	1	1	3	28	26	3	394	173	176	hypothetical protein F775_22455 [Aegilops tauschii]
Novel07795	3	7	1	14	19	16	22	35	33	predicted protein [Hordeum vulgare subsp. vulgare]
Novel07824	14	9	28	104	175	281	160	176	233	hypothetical protein F775_20100 [Aegilops tauschii]
Novel07913	0	0	2	18	9	21	12	5	30	unknown protein [Oryza sativa Japonica Group]
Novel07990	0	0	1	14	28	8	393	350	264	hypothetical protein TRIUR3_01476 [Triticum urartu]
Novel08028	0	1	0	11	8	9	54	38	18	hypothetical protein TRIUR3_15295 [Triticum urartu]
Novel08103	17	10	15	466	878	694	2521	2098	4206	Putative peptide transporter [Aegilops tauschii]
Novel08123	119	122	173	521	600	529	393	374	535	1,2-dihydroxy-3-keto-5-methylthiopentene dioxygenase 2 [Triticum urartu]
Novel08129	1	0	3	14	19	6	31	50	20	hypothetical protein TRIUR3_10557 [Triticum urartu]
Novel08145	2	1	5	11	13	19	12	15	30	hypothetical protein F775_24281 [Aegilops tauschii]
Novel08190	40	46	62	313	302	155	852	922	1181	#N/A
Novel08344	3	3	1	135	119	112	349	280	577	#N/A
Novel08360	3	0	2	186	377	197	115	99	220	PREDICTED: serine/threonine-protein phosphatase 7 long form homolog [Brachypodium distachyon]
Novel08366	46	54	99	798	510	339	9545	8262	10917	Dehydrin DHN1 [Aegilops tauschii]
Novel08381	1	1	2	16	22	39	14	12	9	Serine/threonine phosphatase BSL1-like protein [Aegilops tauschii]
Novel08392	2	2	6	305	193	367	1138	929	1265	#N/A
Novel08398	94	91	103	345	431	422	739	715	1440	Subtilisin-like protease [Triticum urartu]
Novel08404	3	2	3	184	229	234	14	35	64	hypothetical protein TRIUR3_15912 [Triticum urartu]
Novel08409	2	4	4	25	23	15	11	11	14	hypothetical protein F775_00516 [Aegilops tauschii]
Novel08481	0	1	1	16	25	31	9	12	10	#N/A
Novel08501	115	108	302	1322	1014	1780	4157	3734	9946	hypothetical protein F775_23973 [Aegilops tauschii]
Novel08546	0	0	0	23	9	16	974	1029	565	retrotransposon protein, putative, Ty3-gypsy subclass [Oryza sativa Japonica Group]
Novel08581	1	3	3	25	31	15	17	7	10	hypothetical protein OsJ_17229 [Oryza sativa Japonica Group]
Novel08589	1	1	2	57	50	76	161	174	194	#N/A
Novel08683	1	5	3	73	28	39	920	989	677	#N/A
Novel08688	8	7	5	14	29	39	18	21	19	hypothetical protein F775_03999 [Aegilops tauschii]
Novel08702	124	77	71	1623	1772	1673	456	481	469	hypothetical protein TRIUR3_34545 [Triticum urartu]
Novel08731	9	13	9	49	59	38	505	679	291	#N/A
Novel08796	32	40	98	1480	1480	2413	2628	2240	5692	#N/A
Novel08815	1	0	0	23	18	0	444	320	107	#N/A
Novel08828	0	0	1	9	15	12	9	13	30	PREDICTED: replication protein A 70 kDa DNA-binding subunit B-like isoform X1 [Oryza brachyantha]>gi|573947888|ref|XP_006656254.1| PREDICTED: replication protein A 70 kDa DNA-binding subunit B-like isoform X2 [Oryza brachyantha]>gi|573947890|ref|XP_006656255.1| PREDICTED: replication protein A 70 kDa DNA-binding subunit B-like isoform X3 [Oryza brachyantha]>gi|573947892|ref|XP_006656256.1| PREDIC…
Novel08840	116	107	124	455	557	473	204	265	535	predicted protein [Hordeum vulgare subsp. vulgare]
Novel08855	174	166	178	845	1028	811	1417	1536	1563	predicted protein [Hordeum vulgare subsp. vulgare]>gi|326508520|dbj|BAJ95782.1| predicted protein [Hordeum vulgare subsp. vulgare]>gi|326514232|dbj|BAJ92266.1| predicted protein [Hordeum vulgare subsp. vulgare]
Novel08856	17	22	18	70	91	77	121	81	83	Cellulose synthase-like protein E6 [Aegilops tauschii]
Novel08938	6	5	5	51	31	16	238	195	407	PREDICTED: metalloendoproteinase 1-like [Brachypodium distachyon]
Novel08947	0	0	0	10	9	0	188	102	43	#N/A
Novel08968	0	2	1	100	73	83	8	12	15	unnamed protein product [Triticum aestivum]
Novel09026	0	1	1	7	13	11	127	136	112	Sulfotransferase 17 [Aegilops tauschii]
Novel09129	63	43	107	1145	1181	1324	3596	3542	9502	hypothetical protein F775_23760 [Aegilops tauschii]
Novel09213	93	87	102	274	439	463	184	209	427	E3 ubiquitin-protein ligase UPL1 [Aegilops tauschii]
Novel09267	7	8	30	86	116	127	65	52	58	hypothetical protein SORBIDRAFT_09g023900 [Sorghum bicolor]>gi|241945272|gb|EES18417.1| hypothetical protein SORBIDRAFT_09g023900 [Sorghum bicolor]
Novel09415	2	4	5	28	54	89	101	90	81	predicted protein [Hordeum vulgare subsp. vulgare]
Novel09537	0	2	5	50	50	78	631	613	745	predicted protein [Hordeum vulgare subsp. vulgare]>gi|326524099|dbj|BAJ97060.1| predicted protein [Hordeum vulgare subsp. vulgare]
Novel09568	5	3	6	20	20	19	18	11	20	#N/A
Novel09572	1	0	0	17	25	51	12	20	19	hypothetical protein TRIUR3_11211 [Triticum urartu]
Novel09641	0	0	0	14	22	6	115	113	75	Putative homeobox-leucine zipper protein HOX26 [Triticum urartu]
Novel09799	2	1	17	27	16	34	281	257	321	hypothetical protein F775_24486 [Aegilops tauschii]
Novel09800	2	0	1	10	12	11	11	7	19	hypothetical protein F775_24114 [Aegilops tauschii]
Novel09831	1	3	1	15	13	34	7	7	21	predicted protein [Hordeum vulgare subsp. vulgare]
Novel09953	1	2	4	8	8	14	118	107	114	hypothetical protein F775_00271 [Aegilops tauschii]
Novel09966	0	0	1	5	20	19	104	74	36	#N/A
Novel10086	11	2	2	24	36	14	710	605	700	#N/A
Novel10140	8	4	2	42	44	18	1002	833	876	#N/A
Novel10143	2	0	0	7	10	2	383	342	465	#N/A
Novel10146	0	1	0	23	28	12	548	475	564	hypothetical protein F775_18998 [Aegilops tauschii]
Novel10189	8	6	7	70	75	23	1384	1121	1160	#N/A
Novel10252	1	0	1	12	17	3	1451	964	896	#N/A
Novel10300	132	178	330	3099	2857	3095	1060	873	1120	#N/A
Novel10380	14	5	12	127	119	109	4237	4860	5582	hypothetical protein F775_42390 [Aegilops tauschii]
Novel10382	10	14	18	62	68	39	162	129	104	#N/A
Novel10407	0	0	0	4	4	5	63	51	127	hypothetical protein F775_43333 [Aegilops tauschii]
Novel10408	5	5	4	52	74	34	311	287	585	PREDICTED: uncharacterized protein LOC103848711 [Brassica rapa]
Novel10458	5	4	3	19	22	26	86	78	97	hypothetical protein F775_07166 [Aegilops tauschii]
Novel10491	4	0	0	14	6	7	140	129	101	hypothetical protein TRIUR3_02695 [Triticum urartu]
Novel10592	9	17	14	93	107	23	731	638	609	hypothetical protein TRIUR3_13481 [Triticum urartu]
Novel10598	4	1	5	23	17	13	16	11	7	starch synthase IIb precursor [Triticum aestivum]
Novel10637	2	0	4	16	20	16	252	237	375	hypothetical protein TRIUR3_16882 [Triticum urartu]
Novel10741	1	0	0	39	36	0	259	251	216	Auxilin-related protein 2 [Triticum urartu]
Novel10753	0	0	1	15	16	1	99	150	70	#N/A
Novel10762	0	0	0	13	9	1	495	644	279	Dehydrin DHN3 [Aegilops tauschii]
Novel10796	5	6	15	35	64	57	24	22	35	#N/A
Novel10804	6	4	14	143	114	126	30	16	41	PREDICTED: uncharacterized protein LOC101768421 [Setaria italica]
Novel11063	2	0	1	17	9	14	148	120	153	unnamed protein product [Triticum aestivum]
Novel11108	7	2	6	18	29	17	12	14	22	Putative cysteine-rich receptor-like protein kinase 20 [Triticum urartu]
Novel11119	5	6	8	43	56	80	14	27	27	hypothetical protein F775_04012 [Aegilops tauschii]
Novel11180	3	5	3	29	32	37	13	15	19	#N/A
Novel11181	7	6	15	43	46	74	30	35	67	predicted protein [Hordeum vulgare subsp. vulgare]
Novel11272	0	1	0	10	2	6	59	41	40	Protein FAR1-RELATED SEQUENCE 3 [Aegilops tauschii]
Novel11275	2	1	2	12	17	14	39	21	46	predicted protein [Hordeum vulgare subsp. vulgare]
Novel11314	40	33	42	659	534	586	257	152	180	predicted protein [Hordeum vulgare subsp. vulgare]
Novel11384	9	3	1	102	88	53	596	560	908	#N/A
Novel11389	2	0	2	10	10	13	12	23	35	hypothetical protein TRIUR3_30867 [Triticum urartu]
Novel11428	3	2	5	15	17	9	11	10	7	#N/A
Novel11446	26	20	23	151	151	126	156	102	89	#N/A
Novel11481	2	2	1	6	6	14	17	9	18	transcription elongation factor 1 [Zea mays]
Novel11491	387	402	463	1662	1903	1686	2431	2074	3355	#N/A
Novel11539	0	0	0	14	39	160	3	2	5	#N/A
Novel11554	0	0	0	31	18	2	468	265	199	#N/A
Novel11558	3	12	3	78	56	39	730	769	637	hypothetical protein TRIUR3_11261 [Triticum urartu]
Novel11559	16	15	14	150	137	96	1685	1920	1742	PREDICTED: uncharacterized protein LOC101782315 [Setaria italica]
Novel11623	19	10	11	53	55	68	50	32	82	#N/A
Novel11626	6	3	13	190	200	199	1051	1121	1362	hypothetical protein TRIUR3_25792 [Triticum urartu]
Novel11676	8	1	3	53	59	39	1117	1380	1529	hypothetical protein F775_42390 [Aegilops tauschii]
Novel11677	0	0	2	55	39	23	1179	1277	1067	#N/A
Novel11687	66	60	169	2116	2023	2773	1960	2037	4457	hypothetical protein TRIUR3_06504 [Triticum urartu]
Novel11802	0	1	2	16	21	26	252	252	153	#N/A
Novel11832	2	0	2	144	164	177	622	493	668	#N/A
Novel11872	1	2	1	47	58	5	705	827	614	OSJNBb0034I13.10 [Oryza sativa Japonica Group]
Novel11906	3	1	2	61	38	4	1001	733	1136	hypothetical protein F775_20598 [Aegilops tauschii]
Novel11928	0	0	1	8	14	4	322	275	149	#N/A
Novel11945	1	0	3	24	38	29	45	33	78	hypothetical protein TRIUR3_06512 [Triticum urartu]
Novel11971	0	0	0	11	17	16	148	117	47	#N/A
Novel11976	3	4	9	251	341	797	283	235	926	hypothetical protein TRIUR3_10988 [Triticum urartu]
Novel12004	0	0	0	7	21	21	286	421	331	hypothetical protein F775_23500 [Aegilops tauschii]
Novel12005	7	5	2	26	26	16	16	17	14	hypothetical protein [Hordeum vulgare subsp. vulgare]>gi|326511138|dbj|BAJ87583.1| predicted protein [Hordeum vulgare subsp. vulgare]
Novel12028	0	0	1	11	18	19	3	6	9	hypothetical protein F775_23500 [Aegilops tauschii]
Novel12141	5	5	18	126	100	83	138	78	83	hypothetical protein F775_17175 [Aegilops tauschii]
Novel12238	72	54	96	642	561	591	888	772	1322	Bifunctional aspartokinase/homoserine dehydrogenase 2, chloroplastic [Triticum urartu]
Novel12240	2	1	0	10	4	8	22	15	12	hypothetical protein F775_17105 [Aegilops tauschii]
Novel12282	7	1	5	30	35	10	29	24	5	#N/A
Novel12306	1	5	24	124	289	668	177	229	85	Os08g0544300 [Oryza sativa Japonica Group]>gi|255678617|dbj|BAH94406.1| Os08g0544300 [Oryza sativa Japonica Group]
Novel12329	4	1	5	48	80	37	33	30	61	Putative glucan endo-1,3-beta-glucosidase A6 [Aegilops tauschii]
Novel12369	1	1	3	154	200	365	88	90	358	#N/A
Novel12461	2	3	0	10	11	10	51	29	15	#N/A
Novel12479	38	35	31	378	428	173	2083	2730	2745	early salt-stress induced 2-2 [Triticum aestivum]
Novel12583	12	15	16	138	120	220	434	253	433	#N/A
Novel12592	4	3	16	135	162	239	92	72	217	Cytochrome P450 76C2 [Triticum urartu]
Novel12627	1	2	1	25	33	34	6	6	10	#N/A
Novel12683	2	0	1	12	10	15	236	185	267	PH01B001I13.11 [Phyllostachys edulis]
Novel12826	14	8	8	30	57	45	23	35	45	hypothetical protein F775_24119 [Aegilops tauschii]
Novel12956	5	2	1	13	18	25	11	3	12	#N/A
Novel13060	10	8	12	28	57	69	17	26	46	PREDICTED: midasin [Phoenix dactylifera]
Novel13116	13	7	17	234	187	236	40	55	42	predicted protein [Hordeum vulgare subsp. vulgare]
Novel13129	1	0	0	23	13	30	5	5	3	#N/A
Novel13188	6	0	2	66	37	14	692	794	629	#N/A
Novel13360	9	5	3	45	46	51	19	11	33	#N/A
Novel13388	11	14	33	161	204	235	773	599	640	hypothetical protein TRIUR3_23739 [Triticum urartu]
Novel13457	0	0	3	34	46	74	23	24	138	gag polyprotein [Triticum monococcum subsp. aegilopoides]
Novel13469	0	3	2	14	10	11	42	53	107	#N/A
Novel13474	1	0	4	18	17	8	12	13	26	hypothetical protein F775_32167 [Aegilops tauschii]
Novel13544	0	1	9	74	80	132	17	20	21	hypothetical protein TRIUR3_09772 [Triticum urartu]
Novel13838	6	4	8	24	24	25	16	11	24	#N/A
Novel13982	1	6	3	22	15	17	12	13	8	unnamed protein product [Triticum aestivum]
Novel13993	3	2	1	17	19	19	689	658	657	#N/A
Novel14003	5	8	13	34	29	41	23	26	31	PREDICTED: transformation/transcription domain-associated protein [Brachypodium distachyon]
Novel14187	0	0	2	67	64	9	1432	1083	1627	Acyltransferase-like protein [Aegilops tauschii]
TRIAE_CS42_1AL_TGACv1_000138_AA0004440	199	108	336	820	781	1005	1103	942	1652	#N/A
TRIAE_CS42_1AL_TGACv1_000157_AA0005000	475	439	484	2574	2401	2228	1636	1719	2152	Aldolase-type TIM barrel
TRIAE_CS42_1AL_TGACv1_000167_AA0005240	1157	1240	1776	5732	6242	6065	4805	4801	7825	Heavy metal-associated domain, HMA
TRIAE_CS42_1AL_TGACv1_000172_AA0005290	1	0	0	9	5	2	9	8	8	#N/A
TRIAE_CS42_1AL_TGACv1_000237_AA0006940	0	0	4	44	93	2	2399	3002	1646	consensus disorder prediction
TRIAE_CS42_1AL_TGACv1_000312_AA0008510	313	213	753	4451	4191	1763	61635	73843	76339	consensus disorder prediction
TRIAE_CS42_1AL_TGACv1_000384_AA0010680	0	2	0	7	10	12	13	16	8	NADH-ubiquinone oxidoreductase, 20 Kd subunit
TRIAE_CS42_1AL_TGACv1_000466_AA0012740	16	21	18	131	77	63	2144	2364	2015	#N/A
TRIAE_CS42_1AL_TGACv1_000496_AA0013490	68	30	52	375	245	326	208	163	161	MATH
TRIAE_CS42_1AL_TGACv1_000597_AA0015440	17	9	9	128	98	95	34	48	49	consensus disorder prediction
TRIAE_CS42_1AL_TGACv1_000710_AA0017540	5	6	0	148	120	147	913	785	1270	#N/A
TRIAE_CS42_1AL_TGACv1_000714_AA0017680	2	3	2	9	17	14	15	9	29	FAD-binding, type 2, subdomain 1
TRIAE_CS42_1AL_TGACv1_000762_AA0018590	19	24	59	709	806	1117	6510	6286	7081	consensus disorder prediction
TRIAE_CS42_1AL_TGACv1_000775_AA0018930	0	0	2	9	5	7	17	9	17	Protein kinase-like domain
TRIAE_CS42_1AL_TGACv1_000845_AA0020270	7646	6886	11993	37769	37584	40965	30162	25903	39813	FAD linked oxidase, N-terminal
TRIAE_CS42_1AL_TGACv1_000848_AA0020320	1	0	0	55	61	4	1079	1259	1065	Small hydrophilic plant seed protein, conserved site
TRIAE_CS42_1AL_TGACv1_000931_AA0022100	4	4	11	29	17	29	173	151	567	Reverse transcriptase domain
TRIAE_CS42_1AL_TGACv1_000931_AA0022110	7	3	17	57	34	38	493	631	1075	consensus disorder prediction
TRIAE_CS42_1AL_TGACv1_000938_AA0022260	174	89	120	1677	1062	1101	2217	2220	1426	Pyridoxal phosphate-dependent transferase, major region, subdomain 1
TRIAE_CS42_1AL_TGACv1_000986_AA0023230	17	23	68	340	242	177	3361	4134	3437	consensus disorder prediction
TRIAE_CS42_1AL_TGACv1_001087_AA0024710	117	127	199	717	787	1027	732	734	908	consensus disorder prediction
TRIAE_CS42_1AL_TGACv1_001135_AA0025630	9	3	5	35	34	47	32	55	77	GDP-fucose protein O-fucosyltransferase
TRIAE_CS42_1AL_TGACv1_001291_AA0028340	13	12	10	83	74	60	43	61	93	consensus disorder prediction
TRIAE_CS42_1AL_TGACv1_001352_AA0029160	13	12	7	144	115	27	3724	3345	1351	Aldo/keto reductase
TRIAE_CS42_1AL_TGACv1_001362_AA0029390	311	225	478	2140	1145	1582	7825	5150	5374	Uncharacterised protein family, basic secretory protein
TRIAE_CS42_1AL_TGACv1_001460_AA0030860	38	33	58	551	394	119	16992	19725	18690	consensus disorder prediction
TRIAE_CS42_1AL_TGACv1_001539_AA0031920	4	2	1	32	37	6	225	315	308	consensus disorder prediction
TRIAE_CS42_1AL_TGACv1_001550_AA0032090	2	1	2	60	53	48	9	4	10	Short-chain dehydrogenase/reductase SDR
TRIAE_CS42_1AL_TGACv1_001552_AA0032180	0	0	1	16	5	7	81	72	21	#N/A
TRIAE_CS42_1AL_TGACv1_001567_AA0032430	2	3	3	27	55	9	1623	1399	657	#N/A
TRIAE_CS42_1AL_TGACv1_001582_AA0032490	4	2	8	30	30	16	43	36	24	#N/A
TRIAE_CS42_1AL_TGACv1_001646_AA0033400	477	312	1242	10452	9817	5955	56898	51908	66232	#N/A
TRIAE_CS42_1AL_TGACv1_001646_AA0033410	5	2	5	48	37	21	115	159	290	#N/A
TRIAE_CS42_1AL_TGACv1_001993_AA0037630	9	13	21	198	137	52	959	898	1088	PPM-type phosphatase domain
TRIAE_CS42_1AL_TGACv1_002036_AA0038010	5	13	7	359	199	20	5972	8200	7513	consensus disorder prediction
TRIAE_CS42_1AL_TGACv1_002057_AA0038220	8	16	90	985	1440	3081	291	211	172	Clp ATPase, C-terminal
TRIAE_CS42_1AL_TGACv1_002075_AA0038510	12	14	29	195	160	219	613	226	122	Uncharacterised protein family, basic secretory protein
TRIAE_CS42_1AL_TGACv1_002083_AA0038560	26	22	25	246	159	170	3363	3392	2447	#N/A
TRIAE_CS42_1AL_TGACv1_002139_AA0039010	83	55	134	712	489	712	823	737	1398	NAC domain
TRIAE_CS42_1AL_TGACv1_002164_AA0039330	1	1	0	35	66	11	1391	705	466	Small hydrophilic plant seed protein
TRIAE_CS42_1AL_TGACv1_002218_AA0039840	4	10	6	19	21	46	24	29	15	consensus disorder prediction
TRIAE_CS42_1AL_TGACv1_002247_AA0040050	25	32	85	361	420	644	186	204	345	RING
TRIAE_CS42_1AL_TGACv1_002281_AA0040460	1	0	3	103	93	59	1898	2362	2003	Oleosin
TRIAE_CS42_1AL_TGACv1_002415_AA0041640	39	15	30	381	364	122	2960	3145	6084	eRF1 domain 1/Pelota-like
TRIAE_CS42_1AL_TGACv1_002444_AA0042030	16	13	33	181	156	166	92	109	137	Serine/threonine-protein kinase, active site
TRIAE_CS42_1AL_TGACv1_002530_AA0042850	3	2	0	31	15	15	60	44	12	Bifunctional inhibitor/plant lipid transfer protein/seed storage helical domain
TRIAE_CS42_1AL_TGACv1_002546_AA0042990	99	92	94	1036	1247	1081	3820	4562	4434	NIF system FeS cluster assembly, NifU, N-terminal
TRIAE_CS42_1AL_TGACv1_002626_AA0043850	1	3	1	8	11	13	6	6	11	Nucleic acid-binding, OB-fold
TRIAE_CS42_1AL_TGACv1_002675_AA0044370	159	85	284	2229	1782	1047	24190	28423	28408	Phosphatidylethanolamine-binding protein
TRIAE_CS42_1AL_TGACv1_002955_AA0046720	1808	1626	2630	17762	17056	14068	6687	7369	6361	Glutathione S-transferase, C-terminal-like
TRIAE_CS42_1AL_TGACv1_003118_AA0047850	8	1	5	233	242	47	4139	4250	4392	Aldo/keto reductase, conserved site
TRIAE_CS42_1AL_TGACv1_003154_AA0048330	2	1	6	18	18	16	38	16	14	P-loop containing nucleoside triphosphate hydrolase
TRIAE_CS42_1AL_TGACv1_003203_AA0048670	121	117	164	818	991	891	428	578	334	Thioredoxin-like fold
TRIAE_CS42_1AL_TGACv1_003472_AA0049980	26	11	41	151	150	423	92	57	81	Heat shock protein 70 family
TRIAE_CS42_1AL_TGACv1_003944_AA0052000	0	1	0	27	12	5	73	74	94	#N/A
TRIAE_CS42_1AL_TGACv1_004249_AA0052940	122	147	147	949	937	896	668	869	1787	EF-hand domain
TRIAE_CS42_1AL_TGACv1_004406_AA0053410	1	0	1	6	14	8	719	844	885	#N/A
TRIAE_CS42_1AL_TGACv1_006068_AA0055030	0	0	0	22	39	0	158	102	29	consensus disorder prediction
TRIAE_CS42_1AS_TGACv1_018970_AA0057130	1	3	0	13	24	5	20	10	6	Transcription factor, MADS-box
TRIAE_CS42_1AS_TGACv1_019017_AA0058020	3	4	3	84	75	98	386	396	576	#N/A
TRIAE_CS42_1AS_TGACv1_019041_AA0058660	11	3	10	348	351	39	3860	4226	2714	AWPM-19-like
TRIAE_CS42_1AS_TGACv1_019074_AA0059770	3	1	5	27	16	20	31	98	183	RmlC-like jelly roll fold
TRIAE_CS42_1AS_TGACv1_019154_AA0061750	1	5	0	63	68	27	11	12	6	consensus disorder prediction
TRIAE_CS42_1AS_TGACv1_019169_AA0062010	5	1	2	34	56	40	29	16	30	consensus disorder prediction
TRIAE_CS42_1AS_TGACv1_019300_AA0064520	4	4	13	37	37	35	90	59	84	#N/A
TRIAE_CS42_1AS_TGACv1_019317_AA0064810	2	7	12	57	47	75	32	30	16	GST_C_Phi
TRIAE_CS42_1AS_TGACv1_019319_AA0064890	3	4	3	27	22	19	27	21	19	consensus disorder prediction
TRIAE_CS42_1AS_TGACv1_019507_AA0067450	12	6	18	131	176	88	49	33	46	Homeodomain-like
TRIAE_CS42_1AS_TGACv1_019639_AA0069270	65	47	140	718	617	276	9834	9740	9271	consensus disorder prediction
TRIAE_CS42_1AS_TGACv1_019763_AA0071210	6	1	1	139	123	26	1957	906	333	Knottin, scorpion toxin-like
TRIAE_CS42_1AS_TGACv1_019861_AA0072300	2	0	3	7	10	16	24	29	28	Glyoxalase/Bleomycin resistance protein/Dihydroxybiphenyl dioxygenase
TRIAE_CS42_1AS_TGACv1_019982_AA0073540	76	20	108	1211	1420	1533	1447	1401	1962	Chloramphenicol acetyltransferase-like domain
TRIAE_CS42_1AS_TGACv1_020007_AA0073790	14	14	36	100	97	147	129	145	170	CCR4-NOT transcription complex subunit 1, CAF1-binding domain
TRIAE_CS42_1AS_TGACv1_020267_AA0076100	8	3	6	263	586	29	9718	11642	7003	NAD(P)-binding domain
TRIAE_CS42_1AS_TGACv1_020422_AA0077450	0	0	1	8	8	1	23	8	7	SGNH hydrolase-type esterase domain
TRIAE_CS42_1AS_TGACv1_020434_AA0077500	23	12	25	350	240	102	7763	9473	8175	consensus disorder prediction
TRIAE_CS42_1BL_TGACv1_030290_AA0085570	49	31	45	672	651	180	3537	4270	5166	Peptide Chain Release Factor eRF1/aRF1, N-terminal
TRIAE_CS42_1BL_TGACv1_030367_AA0088180	4	0	9	127	89	243	236	156	627	#N/A
TRIAE_CS42_1BL_TGACv1_030387_AA0089080	0	0	1	56	73	4	1667	1683	1462	#N/A
TRIAE_CS42_1BL_TGACv1_030421_AA0090240	2	0	0	65	50	3	304	373	218	PPM-type phosphatase domain
TRIAE_CS42_1BL_TGACv1_030424_AA0090340	22	19	20	81	106	84	79	84	134	Pentatricopeptide repeat
TRIAE_CS42_1BL_TGACv1_030440_AA0090730	11	14	16	225	177	105	1762	2618	1996	consensus disorder prediction
TRIAE_CS42_1BL_TGACv1_030456_AA0091220	36	38	119	1131	1299	2113	7522	7627	8250	consensus disorder prediction
TRIAE_CS42_1BL_TGACv1_030460_AA0091400	5	2	1	169	113	13	1638	1818	1524	#N/A
TRIAE_CS42_1BL_TGACv1_030465_AA0091580	0	0	0	25	31	0	470	529	437	Zinc finger, CCHC-type
TRIAE_CS42_1BL_TGACv1_030471_AA0091900	0	0	0	4	9	13	3	3	6	Late embryogenesis abundant protein, LEA-14
TRIAE_CS42_1BL_TGACv1_030473_AA0091920	6	2	6	38	29	12	69	82	69	NADP-dependent oxidoreductase domain
TRIAE_CS42_1BL_TGACv1_030501_AA0092460	8	6	14	71	70	85	51	58	122	#N/A
TRIAE_CS42_1BL_TGACv1_030501_AA0092470	6	3	7	65	78	54	14	14	27	#N/A
TRIAE_CS42_1BL_TGACv1_030514_AA0092960	6	2	3	26	10	15	12	9	17	consensus disorder prediction
TRIAE_CS42_1BL_TGACv1_030669_AA0097430	75	14	27	1270	1661	127	47991	62821	37655	Aldo/keto reductase, conserved site
TRIAE_CS42_1BL_TGACv1_030695_AA0098120	0	2	4	8	6	15	3	11	16	Cytochrome c oxidase subunit VII
TRIAE_CS42_1BL_TGACv1_030765_AA0100240	1	0	0	4	8	4	11	7	2	P-loop containing nucleoside triphosphate hydrolase
TRIAE_CS42_1BL_TGACv1_030782_AA0100720	14	16	21	579	389	487	260	326	290	Enoyl-(Acyl carrier protein) reductase
TRIAE_CS42_1BL_TGACv1_030961_AA0104610	10	5	18	54	52	50	82	65	67	consensus disorder prediction
TRIAE_CS42_1BL_TGACv1_030966_AA0104690	14	18	18	307	266	30	11233	12719	11437	consensus disorder prediction
TRIAE_CS42_1BL_TGACv1_031022_AA0105970	2	3	5	127	122	99	91	112	170	#N/A
TRIAE_CS42_1BL_TGACv1_031048_AA0106690	141	225	725	2128	2695	5242	1331	1210	995	ATPase, AAA-type, core
TRIAE_CS42_1BL_TGACv1_031049_AA0106750	99	99	147	1249	989	225	17126	22165	19918	consensus disorder prediction
TRIAE_CS42_1BL_TGACv1_031117_AA0108110	13	19	20	147	144	147	48	76	108	Serine/threonine-protein kinase, active site
TRIAE_CS42_1BL_TGACv1_031145_AA0108610	14	12	24	751	802	654	3132	3723	3353	NIF system FeS cluster assembly, NifU, N-terminal
TRIAE_CS42_1BL_TGACv1_031320_AA0111530	2	2	1	22	23	19	34	71	34	consensus disorder prediction
TRIAE_CS42_1BL_TGACv1_031362_AA0112350	110	74	156	1620	1079	583	13082	14619	14599	consensus disorder prediction
TRIAE_CS42_1BL_TGACv1_031362_AA0112360	68	97	190	1081	826	424	10215	11542	13728	#N/A
TRIAE_CS42_1BL_TGACv1_031533_AA0115710	52	66	61	219	220	289	365	326	389	RNA polymerase sigma-70 region 3
TRIAE_CS42_1BL_TGACv1_031533_AA0115720	5	2	11	28	23	26	24	17	28	#N/A
TRIAE_CS42_1BL_TGACv1_031624_AA0117310	232	188	524	3109	2641	1616	35955	36336	39167	#N/A
TRIAE_CS42_1BL_TGACv1_031767_AA0120300	0	0	2	51	68	25	1259	1659	1300	Oleosin
TRIAE_CS42_1BL_TGACv1_031805_AA0120880	1	1	1	58	78	6	2117	1861	723	Small hydrophilic plant seed protein, conserved site
TRIAE_CS42_1BL_TGACv1_031822_AA0121110	4	12	15	223	302	407	72	44	89	consensus disorder prediction
TRIAE_CS42_1BL_TGACv1_031958_AA0123500	43	42	60	577	615	582	111	122	318	#N/A
TRIAE_CS42_1BL_TGACv1_031997_AA0124020	5	10	6	27	45	16	21	19	20	Leucine-rich repeat-containing N-terminal, plant-type
TRIAE_CS42_1BL_TGACv1_032005_AA0124130	1	0	0	18	12	19	16	8	15	NADH:ubiquinone oxidoreductase-like, 20kDa subunit
TRIAE_CS42_1BL_TGACv1_032010_AA0124150	69	62	177	548	411	302	1705	1825	2775	NAC domain
TRIAE_CS42_1BL_TGACv1_032208_AA0126830	8	7	20	276	181	256	67	60	211	Protein kinase domain
TRIAE_CS42_1BL_TGACv1_032402_AA0129480	5	0	3	143	238	12	7527	7509	5851	#N/A
TRIAE_CS42_1BL_TGACv1_032454_AA0130080	204	76	302	2162	1697	829	22176	29122	26558	YbhB/YbcL
TRIAE_CS42_1BL_TGACv1_032533_AA0130990	2	3	4	10	11	15	33	43	24	Blue (type 1) copper protein, binding site
TRIAE_CS42_1BL_TGACv1_032611_AA0132040	9	3	5	50	65	33	8	25	34	consensus disorder prediction
TRIAE_CS42_1BL_TGACv1_032657_AA0132450	15	2	2	197	196	13	4610	4757	4356	#N/A
TRIAE_CS42_1BL_TGACv1_032703_AA0133100	44	15	36	803	795	152	13432	20098	17736	consensus disorder prediction
TRIAE_CS42_1BL_TGACv1_032741_AA0133580	4	1	0	15	7	8	11	9	5	Cytochrome P450, conserved site
TRIAE_CS42_1BL_TGACv1_032777_AA0134000	553	753	1362	6824	4828	6695	36746	35580	42222	Uncharacterised protein family, basic secretory protein
TRIAE_CS42_1BL_TGACv1_032980_AA0136000	12	21	21	133	98	33	1232	1339	1273	Zinc finger, RING-CH-type
TRIAE_CS42_1BL_TGACv1_033018_AA0136240	10	8	25	68	51	81	74	77	135	consensus disorder prediction
TRIAE_CS42_1BL_TGACv1_033189_AA0137630	27	16	22	117	104	52	9012	10792	9945	Helitron helicase-like domain
TRIAE_CS42_1BL_TGACv1_033292_AA0138560	7	0	0	35	10	15	11	11	7	CAP_ED
TRIAE_CS42_1BL_TGACv1_033749_AA0141880	5	1	7	29	37	13	72	75	110	#N/A
TRIAE_CS42_1BL_TGACv1_034040_AA0143180	627	470	964	14938	14161	12417	3864	4689	5192	Glutathione S-transferase, C-terminal-like
TRIAE_CS42_1BL_TGACv1_035047_AA0146070	1	0	6	33	25	13	714	813	466	#N/A
TRIAE_CS42_1BS_TGACv1_049385_AA0151620	25	20	50	316	280	112	4877	5606	5696	consensus disorder prediction
TRIAE_CS42_1BS_TGACv1_049649_AA0158860	2	1	0	46	43	3	534	471	275	AWPM-19-like
TRIAE_CS42_1BS_TGACv1_050130_AA0167880	4	1	3	26	25	35	126	116	157	Chloramphenicol acetyltransferase-like domain
TRIAE_CS42_1BS_TGACv1_050150_AA0168130	2	1	0	24	64	6	1339	1678	1138	SDR_c1
TRIAE_CS42_1BS_TGACv1_050178_AA0168680	2	4	12	47	48	20	1124	1116	1066	PLAT/LH2 domain
TRIAE_CS42_1BS_TGACv1_050183_AA0168730	0	1	5	7	15	7	8	4	13	#N/A
TRIAE_CS42_1BS_TGACv1_050370_AA0171310	0	0	0	5	3	7	11	6	2	#N/A
TRIAE_CS42_1BS_TGACv1_050399_AA0171670	11	0	1	42	19	13	30	35	20	Laccase
TRIAE_CS42_1BS_TGACv1_051393_AA0179440	1	0	0	3	11	8	28	29	19	Chloramphenicol acetyltransferase-like domain
TRIAE_CS42_1DL_TGACv1_061055_AA0183290	3	0	5	20	11	15	67	68	37	Protein of unknown function DUF810
TRIAE_CS42_1DL_TGACv1_061065_AA0183740	11	8	5	40	42	20	124	61	42	Alpha/Beta hydrolase fold
[truncated: 7,017 more rows]

## Sheet: ABA-independent signalling 24 h
Genes in red were up-regulated at 24 h osmotic stress, and the genes in green were down-regulated at 24 h osmotic stress in ABA-independent signalling pathway.
[truncated: 5,130 more rows]
