# Supplementary material for: Transcriptome analysis of osmotic-responsive genes in ABA-dependent and -independent pathways in wheat (Triticum aestivum L.) roots
Source: PeerJ. 2019 Mar 5;7:e6519. doi: 10.7717/peerj.6519 (PMC6407504; doi:10.7717/peerj.6519)
Supplement: Supplemental Information 3 [file peerj-07-6519-s003.xlsx]

## Sheet: Sheet1
Supplementary file 3. Transcription factors responding to osmotic stress in ABA-dependent and ABA-independent pathways at 3 h and 24 h.
Trans_Factor	Up-regulated				Down-regulated
	3h_ABA-dependent signaling	3h_ABA-independent signaling	24h_ABA-dependent signaling	24h_ABA-independent signaling	3h_ABA-dependent signaling	3h_ABA-independent signaling	24h_ABA-dependent signaling	24h_ABA-independent signaling
WRKY	9	70	3	23	0	2	7	2
AP2-EREBP	23	56	16	33	15	1	32	11
MYB	19	45	4	40	5	1	28	10
C2H2	30	40	25	42	1	0	4	4
NAC	10	32	13	42	0	2	5	2
bHLH	4	23	1	9	6	1	33	17
HSF	21	11	16	8	0	0	3	3
bZIP	5	5	9	3	4	5	17	0
HB	5	8	10	6	1	0	10	1
GRAS	2	17	1	7	1	0	9	1
Tify	12	18	3	3	0	0	0	1
OFP	1	5	1	0	2	0	24	4
ABI3VP1	0	7	2	11	1	1	5	3
Orphans	3	6	2	9	0	0	1	8
CCAAT	0	0	0	3	0	0	23	0
AUX/IAA	0	5	0	1	0	0	17	2
FAR1	0	1	3	7	0	7	2	5
MADS	1	2	2	10	1	3	1	1
GNAT	2	11	1	3	0	0	3	0
C2C2-Dof	1	6	0	1	0	0	10	2
C3H	2	5	0	4	0	0	3	0
LOB	0	4	0	2	1	0	2	5
TRAF	1	4	1	2	0	0	3	0
MBF1	0	3	0	3	0	0	0	0
TAZ	3	3	2	0	0	0	0	0
SET	2	2	0	7	0	0	3	0
Sigma70-like	0	2	0	2	0	0	0	0
CPP	0	1	0	7	0	0	0	0
G2-like	0	1	3	4	1	1	3	2
LIM	0	1	0	0	0	0	0	1
LUG	0	1	0	0	0	0	0	0
PLATZ	0	1	0	0	0	0	2	3
Rcd1-like	0	1	0	0	0	0	0	0
RWP-RK	0	1	0	1	0	0	0	0
SBP	0	1	0	0	0	0	0	1
SNF2	0	1	0	1	0	1	2	2
TCP	1	1	2	0	0	0	7	1
Trihelix	0	1	0	0	0	0	2	3
zf-HD	0	1	0	0	0	1	0	0
DBP	2	0	1	1	0	0	0	0
FHA	0	0	0	0	0	1	1	2
CSD	0	0	0	0	0	1	4	0
PHD	0	0	0	0	1	0	5	2
GRF	0	0	0	0	0	0	2	4
DDT	0	0	0	0	0	0	2	1
E2F-DP	0	0	0	0	0	0	2	0
HMG	0	0	0	0	0	0	5	2
TUB	0	0	0	0	0	0	1	2
C2C2-GATA	0	0	0	4	1	0	7	4
SRS	0	0	0	3	0	0	0	0
ARF	0	0	0	1	0	0	0	2
ARR-B	0	0	0	1	0	0	0	0
BES1	1	0	0	1	0	0	0	0
mTERF	0	0	2	1	0	0	0	0
EIL	0	0	3	0	0	0	0	0
Sum	160	403	126	306	41	28	290	114
